# Supplementary material for: Hydrogen production from natural gas and biomethane with carbon capture and storage – A techno-environmental analysis
Source: Royal Society of Chemistry journal article supplement (doi:10.1039/d0se00222d), 2020-01-01
Supplement: d0se00222d1.zip [file d0se00222d1.zip]

## Sheet: Contents
	Publication Title	Hydrogen production from natural gas and biomethane with carbon capture and storage – a techno-environmental analysis
	Authors	Cristina Antonini, Karin Treyer, Anne Streb, Mijndert van der Spek, Christian Bauer, Marco Mazzotti
	Electronic Supplementary Information:		Life Cycle Inventories and Life Cycle Impact Assessment results
	This workbook contains the following sheets:
		Sheet name	Description	Complementary jupyter notebooks	Comment jupyter notebook	Data sources
	1)	LCI_Cstorage_Biomethane	Life Cycle Inventory data for carbon transport and storage in a saline aquifer as well as for upgrading of biogas to biomethane via amine scrubbing.	1_Elegancy LCI Import.ipynb	Import of LCI data into BW2	a) C transport/storage: Volkart K, Bauer C, Boulet C. Life cycle assessment of carbon capture and storage in power generation and industry in Europe. Int J Greenh Gas Control. 2013;16. b) Biogas upgrading: Zhang X, Witte J, Schildhauer T, Bauer C. Life cycle assessment of Power-to-Gas with biogas as carbon source. Sustain Energy Fuels. 2019;submitted.
	2)	DS creation_SMR	LCI for datasets creation for H2 production from SMR, all configurations and sensitivities	2_H2 from SMR.ipynb	Creation of datasets in BW2	Data from present project
	3)	DS creation_ATR	LCI for datasets creation for H2 production from ATR, all configurations and sensitivities	3_H2 from ATR.ipynb	Creation of datasets in BW2	Data from present project
	4)	LCIA	LCIA results for the chosen LCIA method (ILCD, cumulative energy demand, non-renewable) including contribution analysis. Results are best presented and used in a Pivot table.	4_contribution_analysis_elegancy.ipynb	Calculation of LCIA results for chosen LCIA methods and subsequent calculation of contributions of foreground processes to defined contribution categories. Export of results in csv format.	Calculated within present project
	5)	H2 from electrolysis	LCI data for PEM electrolyser.	5_H2 from Electrolysis.ipynb	Import of LCI data into BW2	Zhang X, Bauer C, Mutel CL, Volkart K. Life Cycle Assessment of Power-to-Gas: Approaches, system variations and their environmental implications. Appl Energy. 2017;190:326–38.
	6)	Carbon balance	Assumptions and calculations for the carbon balance			ecoinvent v3.5 dataset "treatment of biowaste by anaerobic digestion" Zschokke, M. and Schleiss, K. 2016. Inventare zur Biomasse-Behandlung. Transfer in ecoinvent v3. Report issued for the Federal Office for Energy, Swiss Government, Switzerland. Personal communication with K. Schleiss
	Note for 1):	The three databases which we use in the LCI are "ecoinvent 3.5 cutoff", "biosphere3", "Elegancy".
		ecoinvent 3.5 cutoff	List of inventory datasets which model supply chains. This represents the background database "ecoinvent".
		biosphere 3	List of elementary flows from a specific ecoinvent release.
		Elegancy	This contains all specific foreground datasets which have been created within the running project.

## Sheet: LCI_Cstorage_Biomethane
cutoff	9
Database	Elegancy
Activity	CO2 storage and transport 200km pipeline, storage 1000m/2025
comment	This dataset represents the transport of CO2 and storage in a saline aquifer.
location	RER
production amount	1
type	process
unit	kilogram
Exchanges
name	reference product	amount	unit	database	categories	location	type	comment
CO2 storage and transport 200km pipeline, storage 1000m/2025	CO2 storage and transport 200km pipeline, storage 1000m/2025	1	kilogram	Elegancy		RER	production	reference product
drilling, deep borehole/m	drilling, deep borehole/m	1.69e-08	meter	Elegancy		RER	technosphere	CO2 transport and storage; taken from CARMA dataset "CO2 storage/100% SNG, post, 200km pipeline, storage 1000m/2025"
market for gas turbine, 10MW electrical	gas turbine, 10MW electrical	2.54e-11	unit	ecoinvent 3.5 cutoff		GLO	technosphere	CO2 transport and storage; taken from CARMA dataset "CO2 storage/100% SNG, post, 200km pipeline, storage 1000m/2025"; changed from medium-voltage to high-voltage due to ETH's comment that the grid access of electricity at the plant is at high voltage
market group for electricity, high voltage	electricity, high voltage	0.00948	kilowatt hour	ecoinvent 3.5 cutoff	RER	RER	technosphere	CO2 transport and storage; taken from CARMA dataset "CO2 storage/100% SNG, post, 200km pipeline, storage 1000m/2025"
transport, pipeline, supercritical CO2, 200km w/o recompression	transport, pipeline, supercritical CO2, 200km w/o recompression	0.0297	ton kilometer	Elegancy		RER	technosphere	CO2 transport and storage; taken from CARMA dataset "CO2 storage/100% SNG, post, 200km pipeline, storage 1000m/2025"
Activity	drilling, deep borehole/m
comment	This dataset represents the transport of CO2 and storage in a saline aquifer.
location	RER
production amount	1
type	process
unit	meter
Exchanges
name	reference product	amount	unit	database	categories	location	type	comment
drilling, deep borehole/m	drilling, deep borehole/m	1	meter	Elegancy		RER	production	reference product
AOX, Adsorbable Organic Halogen as Cl		4.78e-07	kilogram	biosphere3	water::surface water		biosphere
Aluminium		0.06	kilogram	biosphere3	water::surface water		biosphere
Arsenic, ion		0.00042	kilogram	biosphere3	water::surface water		biosphere
BOD5, Biological Oxygen Demand		0.3	kilogram	biosphere3	water::surface water		biosphere
Barium		0.006	kilogram	biosphere3	water::surface water		biosphere
Boron		0.009	kilogram	biosphere3	water::surface water		biosphere
COD, Chemical Oxygen Demand		3	kilogram	biosphere3	water::surface water		biosphere
Calcium, ion		0.6	kilogram	biosphere3	water::surface water		biosphere
Chloride		6	kilogram	biosphere3	water::surface water		biosphere
Chromium, ion		0.0006	kilogram	biosphere3	water::surface water		biosphere
DOC, Dissolved Organic Carbon		0.3	kilogram	biosphere3	water::surface water		biosphere
Fluoride		0.003	kilogram	biosphere3	water::surface water		biosphere
Hydrocarbons, aromatic		0.003	kilogram	biosphere3	water::surface water		biosphere
Iron, ion		0.18	kilogram	biosphere3	water::surface water		biosphere
Magnesium		0.12	kilogram	biosphere3	water::surface water		biosphere
Manganese		0.003	kilogram	biosphere3	water::surface water		biosphere
Methane, dichloro-, HCC-30		0.06	kilogram	biosphere3	water::surface water		biosphere
Particulates, > 10 um		0.0148	kilogram	biosphere3	air::non-urban air or from high stacks		biosphere
Phosphorus		0.0012	kilogram	biosphere3	water::surface water		biosphere
Potassium, ion		0.9	kilogram	biosphere3	water::surface water		biosphere
Silicon		0.03	kilogram	biosphere3	water::surface water		biosphere
Sodium, ion		6	kilogram	biosphere3	water::surface water		biosphere
Strontium		0.018	kilogram	biosphere3	water::surface water		biosphere
Sulfur		0.12	kilogram	biosphere3	water::surface water		biosphere
TOC, Total Organic Carbon		0.3	kilogram	biosphere3	water::surface water		biosphere
Water, well, in ground		3.34	cubic meter	biosphere3	natural resource::in water		biosphere
Zinc, ion		0.0012	kilogram	biosphere3	water::surface water		biosphere
activated bentonite production	activated bentonite	20	kilogram	ecoinvent 3.5 cutoff		DE	technosphere
barite production	barite	270	kilogram	ecoinvent 3.5 cutoff		RER	technosphere
cement production, Portland	cement, Portland	200	kilogram	ecoinvent 3.5 cutoff		CH	technosphere
diesel, burned in diesel-electric generating set, 18.5kW	diesel, burned in diesel-electric generating set, 18.5kW	6300	megajoule	ecoinvent 3.5 cutoff		GLO	technosphere
lignite mine operation	lignite	0.2	kilogram	ecoinvent 3.5 cutoff		RER	technosphere
market for chemical, organic	chemical, organic	9.05	kilogram	ecoinvent 3.5 cutoff		GLO	technosphere
market for chemicals, inorganic	chemical, inorganic	42.2	kilogram	ecoinvent 3.5 cutoff		GLO	technosphere
market for lubricating oil	lubricating oil	60	kilogram	ecoinvent 3.5 cutoff		RER	technosphere
market for steel, low-alloyed	steel, low-alloyed	210	kilogram	ecoinvent 3.5 cutoff		GLO	technosphere
market for transport, freight train	transport, freight train	487	ton kilometer	ecoinvent 3.5 cutoff		Europe without Switzerland	technosphere
market for transport, freight, lorry, unspecified	transport, freight, lorry, unspecified	81.1	ton kilometer	ecoinvent 3.5 cutoff		RER	technosphere
treatment of drilling waste, landfarming	drilling waste	-237	kilogram	ecoinvent 3.5 cutoff		CH	technosphere
treatment of drilling waste, residual material landfill	drilling waste	-158	kilogram	ecoinvent 3.5 cutoff		CH	technosphere
treatment of hazardous waste, hazardous waste incineration	hazardous waste, for incineration	-5	kilogram	ecoinvent 3.5 cutoff		CH	technosphere
Activity	transport, pipeline, supercritical CO2, 200km w/o recompression
comment	This dataset represents the transport of CO2 and storage in a saline aquifer.
location	RER
production amount	1
type	process
unit	ton kilometer
Exchanges
name	reference product	amount	unit	database	categories	location	type	comment
transport, pipeline, supercritical CO2, 200km w/o recompression	transport, pipeline, supercritical CO2, 200km w/o recompression	1	ton kilometer	Elegancy		RER	production	reference product
Carbon dioxide, fossil		0.00026	kilogram	biosphere3	air::urban air close to ground		biosphere
pipeline, supercritical CO2/km	pipeline, supercritical CO2/km	4.22e-09	kilometer	Elegancy		RER	technosphere
Activity	pipeline, supercritical CO2/km
comment	This dataset represents the transport of CO2 and storage in a saline aquifer.
location	RER
production amount	1
type	process
unit	kilometer
Exchanges
name	reference product	amount	unit	database	categories	location	type	comment
pipeline, supercritical CO2/km	pipeline, supercritical CO2/km	1	kilometer	Elegancy		RER	production	reference product
Occupation, construction site		3330	square meter-year	biosphere3	natural resource::land		biosphere
Transformation, from forest, unspecified		2000	square meter	biosphere3	natural resource::land		biosphere
Transformation, to heterogeneous, agricultural		2000	square meter	biosphere3	natural resource::land		biosphere
Water, unspecified natural origin		187	cubic meter	biosphere3	natural resource::in water		biosphere
drawing of pipe, steel	drawing of pipe, steel	270000	kilogram	ecoinvent 3.5 cutoff		RER	technosphere
gravel and sand quarry operation	sand	4400000	kilogram	ecoinvent 3.5 cutoff		CH	technosphere
market for diesel, burned in building machine	diesel, burned in building machine	3310000	megajoule	ecoinvent 3.5 cutoff		GLO	technosphere
market for steel, low-alloyed	steel, low-alloyed	270000	kilogram	ecoinvent 3.5 cutoff		GLO	technosphere
market for stone wool, packed	stone wool, packed	5120	kilogram	ecoinvent 3.5 cutoff		GLO	technosphere
market for transport, freight train	transport, freight train	55100	ton kilometer	ecoinvent 3.5 cutoff		Europe without Switzerland	technosphere
market for transport, freight, lorry, unspecified	transport, freight, lorry, unspecified	315000	ton kilometer	ecoinvent 3.5 cutoff		RER	technosphere
transport, helicopter	transport, helicopter	26	hour	ecoinvent 3.5 cutoff		GLO	technosphere
transport, helicopter, LTO cycle	transport, helicopter, LTO cycle	10.4	unit	ecoinvent 3.5 cutoff		GLO	technosphere
treatment of inert waste, inert material landfill	inert waste, for final disposal	-4400000	kilogram	ecoinvent 3.5 cutoff		CH	technosphere
treatment of scrap steel, inert material landfill	scrap steel	-135000	kilogram	ecoinvent 3.5 cutoff		CH	technosphere
treatment of waste mineral wool, inert material landfill	waste mineral wool, for final disposal	-5120	kilogram	ecoinvent 3.5 cutoff		CH	technosphere
Activity	biomethane from biogas upgrading - biowaste - amine scrubbing, best - with biogenic carbon uptake, lower bound C sequestration, with C to soil from digestate
comment	This dataset represents upgrading of biogas to biomethane via amine scrubbing. It is adjusted according to the composition of biogas that feeds into the process, and adjusted to include biogenic carbon uptake.
location	CH
production amount	1
unit	cubic meter
Exchanges
name	reference product	amount	unit	database	categories	location	type	comment
biomethane from biogas upgrading - biowaste - amine scrubbing, best - with biogenic carbon uptake, lower bound C sequestration, with C to soil from digestate	biomethane	1	cubic meter	Elegancy		CH	production	reference product
treatment of biowaste by anaerobic digestion, with biogenic carbon uptake, lower bound C sequestration, with C to soil from digestate	biogas	1.8232	cubic meter	ecoinvent 3.5 cutoff		CH	technosphere	adapted dataset to include carbon uptake
market for chemical factory, organics	chemical factory, organics	4e-10	unit	ecoinvent 3.5 cutoff		GLO	technosphere	conventional biogas upgrading facility; approximation based on ecoinvent background dataset for conventional biogas upgrading; including compressor, gas cleaning, upgrading, TSA
market for activated carbon, granular	activated carbon, granular	0.000883978	kilogram	ecoinvent 3.5 cutoff		GLO	technosphere	material consumption for desulphurisation
market for water, deionised, from tap water, at user	water, deionised, from tap water, at user	0.0546961	kilogram	ecoinvent 3.5 cutoff		CH	technosphere
market for monoethanolamine	monoethanolamine	5.46961e-05	kilogram	ecoinvent 3.5 cutoff		GLO	technosphere	material consumption for gas upgrading
activated silica production	activated silica	0.0232459	kilogram	ecoinvent 3.5 cutoff		GLO	technosphere	material used for water removal before biogas upgrading
production of 2 wt-% potassium iodide solution	2 wt-% potassium iodide solution	0.00917127	kilogram	Elegancy		RER	technosphere	material consumption for desulphurisation, used together with activated carbon
market for electricity, medium voltage	electricity, medium voltage	0.12	kilowatt hour	ecoinvent 3.5 cutoff		CH	technosphere	electricity consumption required for compression of feed-in gas, conditioning, and product gas recovery
Methane, non-fossil		0.0002868	kilogram	biosphere3	air		biosphere	methane slip	The methane slip for amine scrubbing is very low (<0.1% (Petersson & Wellinger, 2009), 0.1-0.2% (Sun et al., 2015), 0.06% (Bauer et al., 2013)) as suggested by several sources.[Hauser_2017_LCC and LCA of biogas upgrading from AD in US.pdf]
Carbon dioxide, from soil or biomass stock		1.82055	kilogram	biosphere3	air		biosphere	assume 2% of carbon dioxide remains in product upgraded biogas (Jungbluth, 2007), and the rest is removed through upgrading
Hydrogen sulfide		3.4875e-06	kilogram	biosphere3	air		biosphere	leak
Sulfur dioxide		0.00055158	kilogram	biosphere3	air		biosphere	H2S reacts with oxygen to produce S on activated carbon, assume S is further oxydized to SO2 to recover activated carbon
Monoethanolamine		6e-06	kilogram	biosphere3	air		biosphere	leak
Ammonia		0.000123	kilogram	biosphere3	air		biosphere	as degradation product of MEA
Activity	biomethane from biogas upgrading - biowaste - amine scrubbing, best - with biogenic carbon uptake, upper bound C sequestration, with C to soil from digestate
comment	This dataset represents upgrading of biogas to biomethane via amine scrubbing. It is adjusted according to the composition of biogas that feeds into the process, and adjusted to include biogenic carbon uptake.
location	CH
production amount	1
unit	cubic meter
Exchanges
name	reference product	amount	unit	database	categories	location	type	comment
biomethane from biogas upgrading - biowaste - amine scrubbing, best - with biogenic carbon uptake, upper bound C sequestration, with C to soil from digestate	biomethane	1	cubic meter	Elegancy		CH	production	reference product
treatment of biowaste by anaerobic digestion, with biogenic carbon uptake, upper bound C sequestration, with C to soil from digestate	biogas	1.8232	cubic meter	ecoinvent 3.5 cutoff		CH	technosphere	adapted dataset to include carbon uptake
market for chemical factory, organics	chemical factory, organics	4e-10	unit	ecoinvent 3.5 cutoff		GLO	technosphere	conventional biogas upgrading facility; approximation based on ecoinvent background dataset for conventional biogas upgrading; including compressor, gas cleaning, upgrading, TSA
market for activated carbon, granular	activated carbon, granular	0.000883978	kilogram	ecoinvent 3.5 cutoff		GLO	technosphere	material consumption for desulphurisation
market for water, deionised, from tap water, at user	water, deionised, from tap water, at user	0.0546961	kilogram	ecoinvent 3.5 cutoff		CH	technosphere
market for monoethanolamine	monoethanolamine	5.46961e-05	kilogram	ecoinvent 3.5 cutoff		GLO	technosphere	material consumption for gas upgrading
activated silica production	activated silica	0.0232459	kilogram	ecoinvent 3.5 cutoff		GLO	technosphere	material used for water removal before biogas upgrading
production of 2 wt-% potassium iodide solution	2 wt-% potassium iodide solution	0.00917127	kilogram	Elegancy		RER	technosphere	material consumption for desulphurisation, used together with activated carbon
market for electricity, medium voltage	electricity, medium voltage	0.12	kilowatt hour	ecoinvent 3.5 cutoff		CH	technosphere	electricity consumption required for compression of feed-in gas, conditioning, and product gas recovery
Methane, non-fossil		0.0002868	kilogram	biosphere3	air		biosphere	methane slip
Carbon dioxide, from soil or biomass stock		1.82055	kilogram	biosphere3	air		biosphere	assume 2% of carbon dioxide remains in product upgraded biogas (Jungbluth, 2007), and the rest is removed through upgrading
Hydrogen sulfide		3.4875e-06	kilogram	biosphere3	air		biosphere	leak
Sulfur dioxide		0.00055158	kilogram	biosphere3	air		biosphere	H2S reacts with oxygen to produce S on activated carbon, assume S is further oxydized to SO2 to recover activated carbon
Monoethanolamine		6e-06	kilogram	biosphere3	air		biosphere	leak
Ammonia		0.000123	kilogram	biosphere3	air		biosphere	as degradation product of MEA
Activity	biomethane from biogas upgrading - biowaste - amine scrubbing, best - with biogenic carbon uptake, lower bound C sequestration, digestate incineration
comment	This dataset represents upgrading of biogas to biomethane via amine scrubbing. It is adjusted according to the composition of biogas that feeds into the process, and adjusted to include biogenic carbon uptake.
location	CH
production amount	1
unit	cubic meter
Exchanges
name	reference product	amount	unit	database	categories	location	type	comment
biomethane from biogas upgrading - biowaste - amine scrubbing, best - with biogenic carbon uptake, lower bound C sequestration, digestate incineration	biomethane	1	cubic meter	Elegancy		CH	production	reference product
treatment of biowaste by anaerobic digestion, with biogenic carbon uptake, lower bound C sequestration, digestate incineration	biogas	1.8232	cubic meter	ecoinvent 3.5 cutoff		CH	technosphere	adapted dataset to include carbon uptake
market for chemical factory, organics	chemical factory, organics	4e-10	unit	ecoinvent 3.5 cutoff		GLO	technosphere	conventional biogas upgrading facility; approximation based on ecoinvent background dataset for conventional biogas upgrading; including compressor, gas cleaning, upgrading, TSA
market for activated carbon, granular	activated carbon, granular	0.000883978	kilogram	ecoinvent 3.5 cutoff		GLO	technosphere	material consumption for desulphurisation
market for water, deionised, from tap water, at user	water, deionised, from tap water, at user	0.0546961	kilogram	ecoinvent 3.5 cutoff		CH	technosphere
market for monoethanolamine	monoethanolamine	5.46961e-05	kilogram	ecoinvent 3.5 cutoff		GLO	technosphere	material consumption for gas upgrading
activated silica production	activated silica	0.0232459	kilogram	ecoinvent 3.5 cutoff		GLO	technosphere	material used for water removal before biogas upgrading
production of 2 wt-% potassium iodide solution	2 wt-% potassium iodide solution	0.00917127	kilogram	Elegancy		RER	technosphere	material consumption for desulphurisation, used together with activated carbon
market for electricity, medium voltage	electricity, medium voltage	0.12	kilowatt hour	ecoinvent 3.5 cutoff		CH	technosphere	electricity consumption required for compression of feed-in gas, conditioning, and product gas recovery
Methane, non-fossil		0.0002868	kilogram	biosphere3	air		biosphere	methane slip
Carbon dioxide, from soil or biomass stock		1.82055	kilogram	biosphere3	air		biosphere	assume 2% of carbon dioxide remains in product upgraded biogas (Jungbluth, 2007), and the rest is removed through upgrading
Hydrogen sulfide		3.4875e-06	kilogram	biosphere3	air		biosphere	leak
Sulfur dioxide		0.00055158	kilogram	biosphere3	air		biosphere	H2S reacts with oxygen to produce S on activated carbon, assume S is further oxydized to SO2 to recover activated carbon
Monoethanolamine		6e-06	kilogram	biosphere3	air		biosphere	leak
Ammonia		0.000123	kilogram	biosphere3	air		biosphere	as degradation product of MEA
Activity	biomethane from biogas upgrading - biowaste - amine scrubbing, best - cut-off approach
comment	This dataset represents upgrading of biogas to biomethane via amine scrubbing. It is adjusted according to the composition of biogas that feeds into the process, and adjusted to include biogenic carbon uptake.
location	CH
production amount	1
unit	cubic meter
Exchanges
name	reference product	amount	unit	database	categories	location	type	comment
biomethane from biogas upgrading - biowaste - amine scrubbing, best - cut-off approach	biomethane	1	cubic meter	Elegancy		CH	production	reference product
treatment of biowaste by anaerobic digestion, cut-off	biogas	1.8232	cubic meter	ecoinvent 3.5 cutoff		CH	technosphere	adapted dataset to include carbon uptake
market for chemical factory, organics	chemical factory, organics	4e-10	unit	ecoinvent 3.5 cutoff		GLO	technosphere	conventional biogas upgrading facility; approximation based on ecoinvent background dataset for conventional biogas upgrading; including compressor, gas cleaning, upgrading, TSA
market for activated carbon, granular	activated carbon, granular	0.000883978	kilogram	ecoinvent 3.5 cutoff		GLO	technosphere	material consumption for desulphurisation
market for water, deionised, from tap water, at user	water, deionised, from tap water, at user	0.0546961	kilogram	ecoinvent 3.5 cutoff		CH	technosphere
market for monoethanolamine	monoethanolamine	5.46961e-05	kilogram	ecoinvent 3.5 cutoff		GLO	technosphere	material consumption for gas upgrading
activated silica production	activated silica	0.0232459	kilogram	ecoinvent 3.5 cutoff		GLO	technosphere	material used for water removal before biogas upgrading
production of 2 wt-% potassium iodide solution	2 wt-% potassium iodide solution	0.00917127	kilogram	Elegancy		RER	technosphere	material consumption for desulphurisation, used together with activated carbon
market for electricity, medium voltage	electricity, medium voltage	0.12	kilowatt hour	ecoinvent 3.5 cutoff		CH	technosphere	electricity consumption required for compression of feed-in gas, conditioning, and product gas recovery
Methane, non-fossil		0.0002868	kilogram	biosphere3	air		biosphere	methane slip
Carbon dioxide, from soil or biomass stock		1.82055	kilogram	biosphere3	air		biosphere	assume 2% of carbon dioxide remains in product upgraded biogas (Jungbluth, 2007), and the rest is removed through upgrading
Hydrogen sulfide		3.4875e-06	kilogram	biosphere3	air		biosphere	leak
Sulfur dioxide		0.00055158	kilogram	biosphere3	air		biosphere	H2S reacts with oxygen to produce S on activated carbon, assume S is further oxydized to SO2 to recover activated carbon
Monoethanolamine		6e-06	kilogram	biosphere3	air		biosphere	leak
Ammonia		0.000123	kilogram	biosphere3	air		biosphere	as degradation product of MEA
Activity	treatment of biowaste by anaerobic digestion, with biogenic carbon uptake, lower bound C sequestration, with C to soil from digestate
comment	This dataset represents upgrading of biogas to biomethane via amine scrubbing. It is adjusted according to the composition of biogas that feeds into the process, and adjusted to include biogenic carbon uptake.
location	CH
production amount	1
unit	cubic meter
Exchanges
name	reference product	amount	unit	database	categories	location	type	comment
treatment of biowaste by anaerobic digestion, with biogenic carbon uptake, lower bound C sequestration, with C to soil from digestate	biogas	1	cubic meter	Elegancy		CH	production	reference product
Carbon dioxide, to soil or biomass stock		5.3592	kilogram	biosphere3	soil		biosphere	adapted dataset to include carbon uptake
Carbon dioxide, from soil or biomass stock		2.95147	kilogram	biosphere3	air		biosphere
Activity	treatment of biowaste by anaerobic digestion, with biogenic carbon uptake, upper bound C sequestration, with C to soil from digestate
comment	This dataset represents upgrading of biogas to biomethane via amine scrubbing. It is adjusted according to the composition of biogas that feeds into the process, and adjusted to include biogenic carbon uptake.
location	CH
production amount	1
unit	cubic meter
Exchanges
name	reference product	amount	unit	database	categories	location	type	comment
treatment of biowaste by anaerobic digestion, with biogenic carbon uptake, upper bound C sequestration, with C to soil from digestate	biogas	1	cubic meter	Elegancy		CH	production	reference product
Carbon dioxide, to soil or biomass stock		7.1456	kilogram	biosphere3	soil		biosphere	adapted dataset to include carbon uptake
Carbon dioxide, from soil or biomass stock		4.15859	kilogram	biosphere3	air		biosphere
Activity	treatment of biowaste by anaerobic digestion, with biogenic carbon uptake, lower bound C sequestration, digestate incineration
comment	This dataset represents upgrading of biogas to biomethane via amine scrubbing. It is adjusted according to the composition of biogas that feeds into the process, and adjusted to include biogenic carbon uptake.
location	CH
production amount	1
unit	cubic meter
Exchanges
name	reference product	amount	unit	database	categories	location	type	comment
treatment of biowaste by anaerobic digestion, with biogenic carbon uptake, lower bound C sequestration, digestate incineration	biogas	1	cubic meter	Elegancy		CH	production	reference product
Carbon dioxide, to soil or biomass stock		5.3592	kilogram	biosphere3	soil		biosphere	adapted dataset to include carbon uptake
Carbon dioxide, from soil or biomass stock		3.40834	kilogram	biosphere3	air		biosphere
Activity	treatment of biowaste by anaerobic digestion, cut-off
comment	This dataset represents upgrading of biogas to biomethane via amine scrubbing. It is adjusted according to the composition of biogas that feeds into the process, and adjusted to include biogenic carbon uptake.
location	CH
production amount	1
unit	cubic meter
Exchanges
name	reference product	amount	unit	database	categories	location	type	comment
treatment of biowaste by anaerobic digestion, cut-off	biogas	1	cubic meter	Elegancy		CH	production	reference product
Carbon dioxide, to soil or biomass stock		0	kilogram	biosphere3	soil		biosphere	biogas is a by-product from a treatment activity and comes free of burdens. The co-product digestate is not considered in this cut-off approach
Carbon dioxide, from soil or biomass stock		0	kilogram	biosphere3	air		biosphere	biogas is a by-product from a treatment activity and comes free of burdens. The co-product digestate is not considered in this cut-off approach
Activity	production of 2 wt-% potassium iodide solution
comment
location	RER
production amount	1
unit	kilogram
Exchanges
name	reference product	amount	unit	database	categories	location	type	Comment
production of 2 wt-% potassium iodide solution	2 wt-% potassium iodide solution	1	kilogram	Elegancy		RER	production
market for potassium hydroxide	potassium hydroxide	1.82069	kilogram	ecoinvent 3.5 cutoff		GLO	technosphere
market for iodine	iodine	1.31269	kilogram	ecoinvent 3.5 cutoff		GLO	technosphere
market for water, deionised, from tap water, at user	water, deionised, from tap water, at user	2.278	kilogram	ecoinvent 3.5 cutoff		Europe without Switzerland	technosphere
market group for electricity, medium voltage	electricity, medium voltage	1.806	kilowatt hour	ecoinvent 3.5 cutoff		ENTSO-E	technosphere
heat production, natural gas, at boiler condensing modulating >100kW	heat, district or industrial, natural gas	0	megajoule	ecoinvent 3.5 cutoff		Europe without Switzerland	technosphere
market for chemical factory	chemical factory	3.43397e-10	kilogram	ecoinvent 3.5 cutoff		GLO	technosphere	taken from process Sodium chloride electrolysis, RER

## Sheet: DS creation_SMR
							SMR NG,	SMR NG, HT+LT,	SMR NG + CCS (MDEA), 90 (lower bound)	SMR NG + CCS (MDEA), 90 (average)	SMR NG + CCS (MDEA), 90 (upper bound)	SMR NG + CCS (MDEA), 98 (lower bound)	SMR NG + CCS (MDEA), 98 (average)	SMR NG + CCS (MDEA), 98 (upper bound)	SMR NG, HT+LT, + CCS (MDEA), 90 (lower bound)	SMR NG, HT+LT, + CCS (MDEA), 90 (average)	SMR NG, HT+LT, + CCS (MDEA), 90 (upper bound)	SMR NG, HT+LT, + CCS (MDEA), 98 (lower bound)	SMR NG, HT+LT, + CCS (MDEA), 98 (average)	SMR NG, HT+LT, + CCS (MDEA), 98 (upper bound)	SMR NG + CCS (VPSA), 98 (lower bound)	SMR NG + CCS (VPSA), 98 (average)	SMR NG + CCS (VPSA), 98 (upper bound)	SMR NG, HT+LT, + CCS (VPSA), 98 (lower bound)	SMR NG, HT+LT, + CCS (VPSA), 98 (average)	SMR NG, HT+LT, + CCS (VPSA), 98 (upper bound)	SMR BM,	SMR BM, HT+LT,	SMR BM + CCS (MDEA), 90 (lower bound)	SMR BM + CCS (MDEA), 90 (average)	SMR BM + CCS (MDEA), 90 (upper bound)	SMR BM + CCS (MDEA), 98 (lower bound)	SMR BM + CCS (MDEA), 98 (average)	SMR BM + CCS (MDEA), 98 (upper bound)	SMR BM, HT+LT, + CCS (MDEA), 90 (lower bound)	SMR BM, HT+LT, + CCS (MDEA), 90 (average)	SMR BM, HT+LT, + CCS (MDEA), 90 (upper bound)	SMR BM, HT+LT, + CCS (MDEA), 98 (lower bound)	SMR BM, HT+LT, + CCS (MDEA), 98 (average)	SMR BM, HT+LT, + CCS (MDEA), 98 (upper bound)	SMR BM + CCS (VPSA), 98 (lower bound)	SMR BM + CCS (VPSA), 98 (average)	SMR BM + CCS (VPSA), 98 (upper bound)	SMR BM, HT+LT, + CCS (VPSA), 98 (lower bound)	SMR BM, HT+LT, + CCS (VPSA), 98 (average)	SMR BM, HT+LT, + CCS (VPSA), 98 (upper bound)	SMR BM, HT+LT, upper bound C sequestration	SMR BM, HT+LT, + CCS (MDEA), 98 (average), upper bound C sequestration	SMR BM, HT+LT, + CCS (VPSA), 98 (average), upper bound C sequestration
name	reference product	database	categories	location	type	unit	amount	amount	amount	amount	amount	amount	amount	amount	amount	amount	amount	amount	amount	amount	amount	amount	amount	amount	amount	amount	amount	amount	amount	amount	amount	amount	amount	amount	amount	amount	amount	amount	amount	amount	amount	amount	amount	amount	amount	amount	amount	amount	amount
Total energy input to reformer+furnace						megajoule	1.29842	1.30639	1.29375	1.29375	1.29375	1.29034	1.29034	1.29034	1.28539	1.28539	1.28539	1.28422	1.28422	1.28422	1.29196	1.29373	1.2955	1.29117	1.29285	1.29453	1.30045	1.30973	1.29324	1.29324	1.29324	1.28815	1.28815	1.28815	1.28624	1.28624	1.28624	1.28371	1.28371	1.28371	1.2962	1.30085	1.30549	1.28958	1.29158	1.29358	1.30973	1.28371	1.29158
Hydrogen production, gaseous, 200 bar, from SMR	Hydrogen, gaseous, 200 bar	H2 from SMR		RER	production	megajoule	1	1	1	1	1	1	1	1	1	1	1	1	1	1	1	1	1	1	1	1	1	1	1	1	1	1	1	1	1	1	1	1	1	1	1	1	1	1	1	1	1	1	1
market group for natural gas, high pressure	natural gas, high pressure	ecoinvent 3.5 cutoff		Europe without Switzerland	technosphere	cubic meter	0.0324606	0.0326598	0.0323438	0.0323438	0.0323438	0.0322586	0.0322586	0.0322586	0.0321346	0.0321346	0.0321346	0.0321054	0.0321054	0.0321054	0.032299	0.0323432	0.0323875	0.0322791	0.0323212	0.0323633	0	0	0	0	0	0	0	0	0	0	0	0	0	0	0	0	0	0	0	0	0	0	0
biomethane from biogas upgrading - biowaste - amine scrubbing, best - with biogenic carbon uptake, lower bound C sequestration, with C to soil from digestate	biomethane	Elegancy		CH	technosphere	cubic meter	0	0	0	0	0	0	0	0	0	0	0	0	0	0	0	0	0	0	0	0	0.0428754	0.0431814	0.0426378	0.0426378	0.0426378	0.0424699	0.0424699	0.0424699	0.042407	0.042407	0.042407	0.0423233	0.0423233	0.0423233	0.0427353	0.0428884	0.0430415	0.0425169	0.0425829	0.0426488	0	0	0
biomethane from biogas upgrading - biowaste - amine scrubbing, best - with biogenic carbon uptake, upper bound C sequestration, with C to soil from digestate	biomethane	Elegancy		CH	technosphere	cubic meter	0	0	0	0	0	0	0	0	0	0	0	0	0	0	0	0	0	0	0	0	0	0	0	0	0	0	0	0	0	0	0	0	0	0	0	0	0	0	0	0	0.0431814	0.0423233	0.0425829
biomethane from biogas upgrading - biowaste - amine scrubbing, best - with biogenic carbon uptake, lower bound C sequestration, digestate incineration	biomethane	Elegancy		CH	technosphere	cubic meter	0	0	0	0	0	0	0	0	0	0	0	0	0	0	0	0	0	0	0	0	0	0	0	0	0	0	0	0	0	0	0	0	0	0	0	0	0	0	0	0	0	0	0
biomethane from biogas upgrading - biowaste - amine scrubbing, best - cut-off approach	biomethane	Elegancy		CH	technosphere	cubic meter	0	0	0	0	0	0	0	0	0	0	0	0	0	0	0	0	0	0	0	0	0	0	0	0	0	0	0	0	0	0	0	0	0	0	0	0	0	0	0	0	0	0	0
market for liquid storage tank, chemicals, organics	liquid storage tank, chemicals, organics	ecoinvent 3.5 cutoff		GLO	technosphere	unit	2.1219e-11	2.1219e-11	2.1219e-11	2.1219e-11	2.1219e-11	2.1219e-11	2.1219e-11	2.1219e-11	2.1219e-11	2.1219e-11	2.1219e-11	2.1219e-11	2.1219e-11	2.1219e-11	2.1219e-11	2.1219e-11	2.1219e-11	2.1219e-11	2.1219e-11	2.1219e-11	2.1219e-11	2.1219e-11	2.1219e-11	2.1219e-11	2.1219e-11	2.1219e-11	2.1219e-11	2.1219e-11	2.1219e-11	2.1219e-11	2.1219e-11	2.1219e-11	2.1219e-11	2.1219e-11	2.1219e-11	2.1219e-11	2.1219e-11	2.1219e-11	2.1219e-11	2.1219e-11	2.1219e-11	2.1219e-11	2.1219e-11
chemical factory construction, organics	chemical factory, organics	ecoinvent 3.5 cutoff		RER	technosphere	unit	4.45693e-12	4.45693e-12	4.45699e-12	4.45699e-12	4.45699e-12	4.45693e-12	4.45693e-12	4.45693e-12	4.45642e-12	4.45642e-12	4.45642e-12	4.45642e-12	4.45642e-12	4.45642e-12	4.45703e-12	4.457e-12	4.45696e-12	4.45704e-12	4.45692e-12	4.45679e-12	4.45693e-12	4.45693e-12	4.45671e-12	4.45671e-12	4.45671e-12	4.45694e-12	4.45694e-12	4.45694e-12	4.45695e-12	4.45695e-12	4.45695e-12	4.45695e-12	4.45695e-12	4.45695e-12	4.45688e-12	4.45683e-12	4.45678e-12	4.45716e-12	4.4571e-12	4.45703e-12	4.45693e-12	4.45695e-12	4.4571e-12
market for water, deionised, from tap water, at user	water, deionised, from tap water, at user	ecoinvent 3.5 cutoff		Europe without Switzerland	technosphere	kilogram	0.0628201	0.0628201	0.0628209	0.0628209	0.0628209	0.0628201	0.0628201	0.0628201	0.0628129	0.0628129	0.0628129	0.0628129	0.0628129	0.0628129	0.0628215	0.062821	0.0628205	0.0628216	0.0628199	0.0628181	0.0628201	0.0628201	0.062817	0.062817	0.062817	0.0628201	0.0628201	0.0628201	0.0628203	0.0628203	0.0628203	0.0628203	0.0628203	0.0628203	0.0628194	0.0628187	0.062818	0.0628233	0.0628224	0.0628215	0.0628201	0.0628203	0.0628224
Water, cooling, unspecified natural origin		biosphere3	natural resource::in water		biosphere	cubic meter	0.00316984	0.00316985	0.00316988	0.00316988	0.00316988	0.00316984	0.00316984	0.00316984	0.00316948	0.00316948	0.00316948	0.00316948	0.00316948	0.00316948	0.00316962	0.00316975	0.00316988	0.00316991	0.00316982	0.00316974	0.00316984	0.00316979	0.00316968	0.00316968	0.00316968	0.00316984	0.00316984	0.00316984	0.0031698	0.0031698	0.0031698	0.0031698	0.0031698	0.0031698	0.0031698	0.00316976	0.00316973	0.00316995	0.0031699	0.00316986	0.00316979	0.0031698	0.0031699
market group for electricity, high voltage	electricity, high voltage	ecoinvent 3.5 cutoff		ENTSO-E	technosphere	kilowatt hour	-0.00115136	0.000103189	0.00210387	0.00213693	0.00216999	0.00296956	0.00300333	0.00303709	0.0040836	0.00411653	0.00414946	0.00567208	0.00570326	0.00573443	0.00550041	0.0059251	0.00634978	0.00641691	0.00695233	0.00748773	-0.00162886	-0.000466178	0.00204292	0.00207596	0.002109	0.00317231	0.00320602	0.00323973	0.00464704	0.00467999	0.00471294	0.00543919	0.00547757	0.00551594	0.00497459	0.00542043	0.00586625	0.00617546	0.00657609	0.00697671	-0.000466178	0.00547757	0.00657609
electricity production, hydro, reservoir, alpine region	electricity, high voltage	ecoinvent 3.5 cutoff		CH	technosphere	kilowatt hour	0	0	0	0	0	0	0	0	0	0	0	0	0	0	0	0	0	0	0	0	0	0	0	0	0	0	0	0	0	0	0	0	0	0	0	0	0	0	0	0	0	0	0
market for diethanolamine	diethanolamine	ecoinvent 3.5 cutoff		GLO	technosphere	kilogram	0	0	1.36487e-06	1.36487e-06	1.36487e-06	1.48502e-06	1.48502e-06	1.48502e-06	1.60507e-06	1.60507e-06	1.60507e-06	1.74566e-06	1.74566e-06	1.74566e-06	0	0	0	0	0	0	0	0	1.36757e-06	1.36757e-06	1.36757e-06	1.48874e-06	1.48874e-06	1.48874e-06	1.60136e-06	1.60136e-06	1.60136e-06	1.74241e-06	1.74241e-06	1.74241e-06	0	0	0	0	0	0	0	1.74241e-06	0
market for aluminium oxide	aluminium oxide	ecoinvent 3.5 cutoff		GLO	technosphere	kilogram	4.4394e-06	4.4394e-06	4.4394e-06	4.4394e-06	4.4394e-06	4.4394e-06	4.4394e-06	4.4394e-06	4.4394e-06	4.4394e-06	4.4394e-06	4.4394e-06	4.4394e-06	4.4394e-06	4.4394e-06	4.4394e-06	4.4394e-06	4.4394e-06	4.4394e-06	4.4394e-06	4.4394e-06	4.4394e-06	4.4394e-06	4.4394e-06	4.4394e-06	4.4394e-06	4.4394e-06	4.4394e-06	4.4394e-06	4.4394e-06	4.4394e-06	4.4394e-06	4.4394e-06	4.4394e-06	4.4394e-06	4.4394e-06	4.4394e-06	4.4394e-06	4.4394e-06	4.4394e-06	4.4394e-06	4.4394e-06	4.4394e-06
market for molybdenum trioxide	molybdenum trioxide	ecoinvent 3.5 cutoff		GLO	technosphere	kilogram	1.39e-07	1.39e-07	1.39e-07	1.39e-07	1.39e-07	1.39e-07	1.39e-07	1.39e-07	1.39e-07	1.39e-07	1.39e-07	1.39e-07	1.39e-07	1.39e-07	1.39e-07	1.39e-07	1.39e-07	1.39e-07	1.39e-07	1.39e-07	1.39e-07	1.39e-07	1.39e-07	1.39e-07	1.39e-07	1.39e-07	1.39e-07	1.39e-07	1.39e-07	1.39e-07	1.39e-07	1.39e-07	1.39e-07	1.39e-07	1.39e-07	1.39e-07	1.39e-07	1.39e-07	1.39e-07	1.39e-07	1.39e-07	1.39e-07	1.39e-07
market for zinc oxide	zinc oxide	ecoinvent 3.5 cutoff		GLO	technosphere	kilogram	3.095e-06	3.095e-06	3.095e-06	3.095e-06	3.095e-06	3.095e-06	3.095e-06	3.095e-06	3.095e-06	3.095e-06	3.095e-06	3.095e-06	3.095e-06	3.095e-06	3.095e-06	3.095e-06	3.095e-06	3.095e-06	3.095e-06	3.095e-06	3.095e-06	3.095e-06	3.095e-06	3.095e-06	3.095e-06	3.095e-06	3.095e-06	3.095e-06	3.095e-06	3.095e-06	3.095e-06	3.095e-06	3.095e-06	3.095e-06	3.095e-06	3.095e-06	3.095e-06	3.095e-06	3.095e-06	3.095e-06	3.095e-06	3.095e-06	3.095e-06
market for quicklime, milled, packed	quicklime, milled, packed	ecoinvent 3.5 cutoff		RER	technosphere	kilogram	4e-07	4e-07	4e-07	4e-07	4e-07	4e-07	4e-07	4e-07	4e-07	4e-07	4e-07	4e-07	4e-07	4e-07	4e-07	4e-07	4e-07	4e-07	4e-07	4e-07	4e-07	4e-07	4e-07	4e-07	4e-07	4e-07	4e-07	4e-07	4e-07	4e-07	4e-07	4e-07	4e-07	4e-07	4e-07	4e-07	4e-07	4e-07	4e-07	4e-07	4e-07	4e-07	4e-07
market for silica sand	silica sand	ecoinvent 3.5 cutoff		GLO	technosphere	kilogram	9.66e-08	9.66e-08	9.66e-08	9.66e-08	9.66e-08	9.66e-08	9.66e-08	9.66e-08	9.66e-08	9.66e-08	9.66e-08	9.66e-08	9.66e-08	9.66e-08	9.66e-08	9.66e-08	9.66e-08	9.66e-08	9.66e-08	9.66e-08	9.66e-08	9.66e-08	9.66e-08	9.66e-08	9.66e-08	9.66e-08	9.66e-08	9.66e-08	9.66e-08	9.66e-08	9.66e-08	9.66e-08	9.66e-08	9.66e-08	9.66e-08	9.66e-08	9.66e-08	9.66e-08	9.66e-08	9.66e-08	9.66e-08	9.66e-08	9.66e-08
market for chromium oxide, flakes	chromium oxide, flakes	ecoinvent 3.5 cutoff		GLO	technosphere	kilogram	3e-07	3e-07	3e-07	3e-07	3e-07	3e-07	3e-07	3e-07	3e-07	3e-07	3e-07	3e-07	3e-07	3e-07	3e-07	3e-07	3e-07	3e-07	3e-07	3e-07	3e-07	3e-07	3e-07	3e-07	3e-07	3e-07	3e-07	3e-07	3e-07	3e-07	3e-07	3e-07	3e-07	3e-07	3e-07	3e-07	3e-07	3e-07	3e-07	3e-07	3e-07	3e-07	3e-07
market for copper oxide	copper oxide	ecoinvent 3.5 cutoff		GLO	technosphere	kilogram	3.02e-06	3.02e-06	3.02e-06	3.02e-06	3.02e-06	3.02e-06	3.02e-06	3.02e-06	3.02e-06	3.02e-06	3.02e-06	3.02e-06	3.02e-06	3.02e-06	3.02e-06	3.02e-06	3.02e-06	3.02e-06	3.02e-06	3.02e-06	3.02e-06	3.02e-06	3.02e-06	3.02e-06	3.02e-06	3.02e-06	3.02e-06	3.02e-06	3.02e-06	3.02e-06	3.02e-06	3.02e-06	3.02e-06	3.02e-06	3.02e-06	3.02e-06	3.02e-06	3.02e-06	3.02e-06	3.02e-06	3.02e-06	3.02e-06	3.02e-06
market for magnesium oxide	magnesium oxide	ecoinvent 3.5 cutoff		GLO	technosphere	kilogram	2.33e-07	2.33e-07	2.33e-07	2.33e-07	2.33e-07	2.33e-07	2.33e-07	2.33e-07	2.33e-07	2.33e-07	2.33e-07	2.33e-07	2.33e-07	2.33e-07	2.33e-07	2.33e-07	2.33e-07	2.33e-07	2.33e-07	2.33e-07	2.33e-07	2.33e-07	2.33e-07	2.33e-07	2.33e-07	2.33e-07	2.33e-07	2.33e-07	2.33e-07	2.33e-07	2.33e-07	2.33e-07	2.33e-07	2.33e-07	2.33e-07	2.33e-07	2.33e-07	2.33e-07	2.33e-07	2.33e-07	2.33e-07	2.33e-07	2.33e-07
market for portafer	portafer	ecoinvent 3.5 cutoff		GLO	technosphere	kilogram	2.603e-06	2.603e-06	2.603e-06	2.603e-06	2.603e-06	2.603e-06	2.603e-06	2.603e-06	2.603e-06	2.603e-06	2.603e-06	2.603e-06	2.603e-06	2.603e-06	2.603e-06	2.603e-06	2.603e-06	2.603e-06	2.603e-06	2.603e-06	2.603e-06	2.603e-06	2.603e-06	2.603e-06	2.603e-06	2.603e-06	2.603e-06	2.603e-06	2.603e-06	2.603e-06	2.603e-06	2.603e-06	2.603e-06	2.603e-06	2.603e-06	2.603e-06	2.603e-06	2.603e-06	2.603e-06	2.603e-06	2.603e-06	2.603e-06	2.603e-06
market for nickel, 99.5%	nickel, 99.5%	ecoinvent 3.5 cutoff		GLO	technosphere	kilogram	1.691e-06	1.691e-06	1.691e-06	1.691e-06	1.691e-06	1.691e-06	1.691e-06	1.691e-06	1.691e-06	1.691e-06	1.691e-06	1.691e-06	1.691e-06	1.691e-06	1.691e-06	1.691e-06	1.691e-06	1.691e-06	1.691e-06	1.691e-06	1.691e-06	1.691e-06	1.691e-06	1.691e-06	1.691e-06	1.691e-06	1.691e-06	1.691e-06	1.691e-06	1.691e-06	1.691e-06	1.691e-06	1.691e-06	1.691e-06	1.691e-06	1.691e-06	1.691e-06	1.691e-06	1.691e-06	1.691e-06	1.691e-06	1.691e-06	1.691e-06
market for zeolite, powder	zeolite, powder	ecoinvent 3.5 cutoff		GLO	technosphere	kilogram	7.35751e-06	7.35751e-06	7.35751e-06	7.35751e-06	7.35751e-06	7.35751e-06	7.35751e-06	7.35751e-06	7.35751e-06	7.35751e-06	7.35751e-06	7.35751e-06	7.35751e-06	7.35751e-06	7.35751e-06	7.35751e-06	7.35751e-06	7.35751e-06	7.35751e-06	7.35751e-06	7.35751e-06	7.35751e-06	7.35751e-06	7.35751e-06	7.35751e-06	7.35751e-06	7.35751e-06	7.35751e-06	7.35751e-06	7.35751e-06	7.35751e-06	7.35751e-06	7.35751e-06	7.35751e-06	7.35751e-06	7.35751e-06	7.35751e-06	7.35751e-06	7.35751e-06	7.35751e-06	7.35751e-06	7.35751e-06	7.35751e-06
CO2 storage and transport 200km pipeline, storage 1000m/2025	CO2 storage and transport 200km pipeline, storage 1000m/2025	Elegancy		RER	technosphere	kilogram	0	0	0.0401432	0.0401432	0.0401432	0.043677	0.043677	0.043677	0.047208	0.047208	0.047208	0.0513431	0.0513431	0.0513431	0.0437131	0.0438959	0.0440788	0.0509641	0.0512845	0.0516049	0	0	0.0402228	0.0402228	0.0402228	0.0437865	0.0437865	0.0437865	0.0470987	0.0470987	0.0470987	0.0512474	0.0512474	0.0512474	0.0441529	0.0441672	0.0441815	0.0508236	0.0509612	0.0510988	0	0.0512474	0.0509612
carbon dioxide, fossil		biosphere3	air		biosphere	kilogram	0.0746243	0.0743524	0.0335096	0.0335096	0.0335096	0.0297827	0.0297827	0.0297827	0.025994	0.025994	0.025994	0.0217538	0.0217538	0.0217538	0.0290399	0.0289473	0.0288547	0.0218382	0.0215558	0.0212734	0	0	0	0	0	0	0	0	0	0	0	0	0	0	0	0	0	0	0	0	0	0	0
Carbon dioxide, from soil or biomass stock		biosphere3	air		biosphere	kilogram	0	0	0	0	0	0	0	0	0	0	0	0	0	0	0	0	0	0	0	0	0.0737682	0.0742943	0.0331381	0.0331381	0.0331381	0.0293394	0.0293394	0.0293394	0.0264145	0.0264145	0.0264145	0.0215704	0.0215704	0.0215704	0.0285484	0.0286153	0.0286823	0.0217564	0.0217244	0.0216924	0.0742943	0.0215704	0.0217244
Acetaldehyde		biosphere3	air		biosphere	kilogram	1.74327e-10	2.55638e-10	1.6964e-10	1.6964e-10	1.6964e-10	1.66245e-10	1.66245e-10	1.66245e-10	2.34779e-10	2.34779e-10	2.34779e-10	2.33608e-10	2.33608e-10	2.33608e-10	1.89793e-10	1.80535e-10	1.71277e-10	2.7941e-10	2.71601e-10	2.63793e-10	1.85133e-10	2.64275e-10	1.77458e-10	1.77458e-10	1.77458e-10	1.72302e-10	1.72302e-10	1.72302e-10	2.4078e-10	2.4078e-10	2.4078e-10	2.38244e-10	2.38244e-10	2.38244e-10	2.02171e-10	1.96049e-10	1.89927e-10	2.81885e-10	2.68925e-10	2.55966e-10	2.64275e-10	2.38244e-10	2.68925e-10
Acetic acid		biosphere3	air		biosphere	kilogram	2.6149e-08	3.83457e-08	2.5446e-08	2.5446e-08	2.5446e-08	2.49368e-08	2.49368e-08	2.49368e-08	3.52168e-08	3.52168e-08	3.52168e-08	3.50413e-08	3.50413e-08	3.50413e-08	2.84689e-08	2.70802e-08	2.56915e-08	4.19115e-08	4.07402e-08	3.95689e-08	2.777e-08	3.96412e-08	2.66187e-08	2.66187e-08	2.66187e-08	2.58453e-08	2.58453e-08	2.58453e-08	3.6117e-08	3.6117e-08	3.6117e-08	3.57365e-08	3.57365e-08	3.57365e-08	3.03256e-08	2.94074e-08	2.84891e-08	4.22828e-08	4.03388e-08	3.83949e-08	3.96412e-08	3.57365e-08	4.03388e-08
Benzene		biosphere3	air		biosphere	kilogram	6.97323e-08	1.02258e-07	6.78577e-08	6.78577e-08	6.78577e-08	6.64997e-08	6.64997e-08	6.64997e-08	9.39138e-08	9.39138e-08	9.39138e-08	9.34456e-08	9.34456e-08	9.34456e-08	7.59189e-08	7.22156e-08	6.85123e-08	1.11767e-07	1.08643e-07	1.0552e-07	7.40551e-08	1.05712e-07	7.09849e-08	7.09849e-08	7.09849e-08	6.89225e-08	6.89225e-08	6.89225e-08	9.63143e-08	9.63143e-08	9.63143e-08	9.52997e-08	9.52997e-08	9.52997e-08	8.08702e-08	7.84215e-08	7.59728e-08	1.12757e-07	1.07573e-07	1.02389e-07	1.05712e-07	9.52997e-08	1.07573e-07
Benzo(a)pyrene		biosphere3	air		biosphere	kilogram	1.74327e-12	2.55638e-12	1.6964e-12	1.6964e-12	1.6964e-12	1.66245e-12	1.66245e-12	1.66245e-12	2.34779e-12	2.34779e-12	2.34779e-12	2.33608e-12	2.33608e-12	2.33608e-12	1.89793e-12	1.80535e-12	1.71277e-12	2.7941e-12	2.71601e-12	2.63793e-12	1.85133e-12	2.64275e-12	1.77458e-12	1.77458e-12	1.77458e-12	1.72302e-12	1.72302e-12	1.72302e-12	2.4078e-12	2.4078e-12	2.4078e-12	2.38244e-12	2.38244e-12	2.38244e-12	2.02171e-12	1.96049e-12	1.89927e-12	2.81885e-12	2.68925e-12	2.55966e-12	2.64275e-12	2.38244e-12	2.68925e-12
Butane		biosphere3	air		biosphere	kilogram	1.22032e-07	1.78951e-07	1.18751e-07	1.18751e-07	1.18751e-07	1.16375e-07	1.16375e-07	1.16375e-07	1.6435e-07	1.6435e-07	1.6435e-07	1.6353e-07	1.6353e-07	1.6353e-07	1.32858e-07	1.26378e-07	1.19897e-07	1.95592e-07	1.90126e-07	1.8466e-07	1.29597e-07	1.84997e-07	1.24224e-07	1.24224e-07	1.24224e-07	1.20615e-07	1.20615e-07	1.20615e-07	1.68551e-07	1.68551e-07	1.68551e-07	1.66775e-07	1.66775e-07	1.66775e-07	1.41523e-07	1.37238e-07	1.32953e-07	1.97325e-07	1.88253e-07	1.79181e-07	1.84997e-07	1.66775e-07	1.88253e-07
Carbon monoxide, fossil		biosphere3	air		biosphere	kilogram	3.66092e-07	5.36849e-07	3.56251e-07	3.56251e-07	3.56251e-07	3.49122e-07	3.49122e-07	3.49122e-07	4.93045e-07	4.93045e-07	4.93045e-07	4.90587e-07	4.90587e-07	4.90587e-07	3.98572e-07	3.7913e-07	3.59688e-07	5.86771e-07	5.70373e-07	5.53975e-07	3.88787e-07	5.54987e-07	3.72668e-07	3.72668e-07	3.72668e-07	3.61841e-07	3.61841e-07	3.61841e-07	5.05647e-07	5.05647e-07	5.05647e-07	5.00321e-07	5.00321e-07	5.00321e-07	4.24566e-07	4.11711e-07	3.98855e-07	5.9197e-07	5.64754e-07	5.37538e-07	5.54987e-07	5.00321e-07	5.64754e-07
Dinitrogen monoxide		biosphere3	air		biosphere	kilogram	1.74327e-08	2.55638e-08	1.6964e-08	1.6964e-08	1.6964e-08	1.66245e-08	1.66245e-08	1.66245e-08	2.34779e-08	2.34779e-08	2.34779e-08	2.33608e-08	2.33608e-08	2.33608e-08	1.89793e-08	1.80535e-08	1.71277e-08	2.7941e-08	2.71601e-08	2.63793e-08	1.85133e-08	2.64275e-08	1.77458e-08	1.77458e-08	1.77458e-08	1.72302e-08	1.72302e-08	1.72302e-08	2.4078e-08	2.4078e-08	2.4078e-08	2.38244e-08	2.38244e-08	2.38244e-08	2.02171e-08	1.96049e-08	1.89927e-08	2.81885e-08	2.68925e-08	2.55966e-08	2.64275e-08	2.38244e-08	2.68925e-08
Formaldehyde		biosphere3	air		biosphere	kilogram	1.74327e-08	2.55638e-08	1.6964e-08	1.6964e-08	1.6964e-08	1.66245e-08	1.66245e-08	1.66245e-08	2.34779e-08	2.34779e-08	2.34779e-08	2.33608e-08	2.33608e-08	2.33608e-08	1.89793e-08	1.80535e-08	1.71277e-08	2.7941e-08	2.71601e-08	2.63793e-08	1.85133e-08	2.64275e-08	1.77458e-08	1.77458e-08	1.77458e-08	1.72302e-08	1.72302e-08	1.72302e-08	2.4078e-08	2.4078e-08	2.4078e-08	2.38244e-08	2.38244e-08	2.38244e-08	2.02171e-08	1.96049e-08	1.89927e-08	2.81885e-08	2.68925e-08	2.55966e-08	2.64275e-08	2.38244e-08	2.68925e-08
Mercury		biosphere3	air		biosphere	kilogram	5.22996e-12	7.66938e-12	5.08936e-12	5.08936e-12	5.08936e-12	4.98752e-12	4.98752e-12	4.98752e-12	7.04359e-12	7.04359e-12	7.04359e-12	7.00847e-12	7.00847e-12	7.00847e-12	5.69396e-12	5.41621e-12	5.13847e-12	8.38256e-12	8.1483e-12	7.91403e-12	5.55417e-12	7.92849e-12	5.32391e-12	5.32391e-12	5.32391e-12	5.16923e-12	5.16923e-12	5.16923e-12	7.22363e-12	7.22363e-12	7.22363e-12	7.14753e-12	7.14753e-12	7.14753e-12	6.06532e-12	5.88166e-12	5.698e-12	8.45683e-12	8.06802e-12	7.67921e-12	7.92849e-12	7.14753e-12	8.06802e-12
Methane, fossil		biosphere3	air		biosphere	kilogram	3.4867e-07	5.113e-07	3.39296e-07	3.39296e-07	3.39296e-07	3.32507e-07	3.32507e-07	3.32507e-07	4.6958e-07	4.6958e-07	4.6958e-07	4.67239e-07	4.67239e-07	4.67239e-07	3.79603e-07	3.61087e-07	3.4257e-07	5.58846e-07	5.43228e-07	5.27611e-07	3.70284e-07	5.28574e-07	3.54933e-07	3.54933e-07	3.54933e-07	3.44621e-07	3.44621e-07	3.44621e-07	4.81583e-07	4.81583e-07	4.81583e-07	4.7651e-07	4.7651e-07	4.7651e-07	4.04361e-07	3.92117e-07	3.79873e-07	5.63797e-07	5.37877e-07	5.11956e-07	5.28574e-07	4.7651e-07	5.37877e-07
Nitrogen oxides		biosphere3	air		biosphere	kilogram	3.12052e-06	4.57603e-06	3.03663e-06	3.03663e-06	3.03663e-06	2.97587e-06	2.97587e-06	2.97587e-06	4.20265e-06	4.20265e-06	4.20265e-06	4.18169e-06	4.18169e-06	4.18169e-06	3.39737e-06	3.23165e-06	3.06593e-06	5.00156e-06	4.86178e-06	4.72201e-06	3.31397e-06	4.73063e-06	3.17657e-06	3.17657e-06	3.17657e-06	3.08428e-06	3.08428e-06	3.08428e-06	4.31007e-06	4.31007e-06	4.31007e-06	4.26466e-06	4.26466e-06	4.26466e-06	3.61895e-06	3.50936e-06	3.39978e-06	5.04587e-06	4.81388e-06	4.5819e-06	4.73063e-06	4.26466e-06	4.81388e-06
PAH, polycyclic aromatic hydrocarbons		biosphere3	air		biosphere	kilogram	1.74327e-09	2.55638e-09	1.6964e-09	1.6964e-09	1.6964e-09	1.66245e-09	1.66245e-09	1.66245e-09	2.34779e-09	2.34779e-09	2.34779e-09	2.33608e-09	2.33608e-09	2.33608e-09	1.89793e-09	1.80535e-09	1.71277e-09	2.7941e-09	2.71601e-09	2.63793e-09	1.85133e-09	2.64275e-09	1.77458e-09	1.77458e-09	1.77458e-09	1.72302e-09	1.72302e-09	1.72302e-09	2.4078e-09	2.4078e-09	2.4078e-09	2.38244e-09	2.38244e-09	2.38244e-09	2.02171e-09	1.96049e-09	1.89927e-09	2.81885e-09	2.68925e-09	2.55966e-09	2.64275e-09	2.38244e-09	2.68925e-09
Particulates, < 2.5 um		biosphere3	air		biosphere	kilogram	3.4867e-08	5.113e-08	3.39296e-08	3.39296e-08	3.39296e-08	3.32507e-08	3.32507e-08	3.32507e-08	4.6958e-08	4.6958e-08	4.6958e-08	4.67239e-08	4.67239e-08	4.67239e-08	3.79603e-08	3.61087e-08	3.4257e-08	5.58846e-08	5.43228e-08	5.27611e-08	3.70284e-08	5.28574e-08	3.54933e-08	3.54933e-08	3.54933e-08	3.44621e-08	3.44621e-08	3.44621e-08	4.81583e-08	4.81583e-08	4.81583e-08	4.7651e-08	4.7651e-08	4.7651e-08	4.04361e-08	3.92117e-08	3.79873e-08	5.63797e-08	5.37877e-08	5.11956e-08	5.28574e-08	4.7651e-08	5.37877e-08
Pentane		biosphere3	air		biosphere	kilogram	2.09205e-07	3.06785e-07	2.03581e-07	2.03581e-07	2.03581e-07	1.99507e-07	1.99507e-07	1.99507e-07	2.81753e-07	2.81753e-07	2.81753e-07	2.80348e-07	2.80348e-07	2.80348e-07	2.27766e-07	2.16655e-07	2.05545e-07	3.35313e-07	3.25942e-07	3.16571e-07	2.22174e-07	3.1715e-07	2.12963e-07	2.12963e-07	2.12963e-07	2.06776e-07	2.06776e-07	2.06776e-07	2.88954e-07	2.88954e-07	2.88954e-07	2.8591e-07	2.8591e-07	2.8591e-07	2.4262e-07	2.35274e-07	2.27927e-07	3.38284e-07	3.22731e-07	3.07178e-07	3.1715e-07	2.8591e-07	3.22731e-07
Propane		biosphere3	air		biosphere	kilogram	3.4867e-08	5.113e-08	3.39296e-08	3.39296e-08	3.39296e-08	3.32507e-08	3.32507e-08	3.32507e-08	4.6958e-08	4.6958e-08	4.6958e-08	4.67239e-08	4.67239e-08	4.67239e-08	3.79603e-08	3.61087e-08	3.4257e-08	5.58846e-08	5.43228e-08	5.27611e-08	3.70284e-08	5.28574e-08	3.54933e-08	3.54933e-08	3.54933e-08	3.44621e-08	3.44621e-08	3.44621e-08	4.81583e-08	4.81583e-08	4.81583e-08	4.7651e-08	4.7651e-08	4.7651e-08	4.04361e-08	3.92117e-08	3.79873e-08	5.63797e-08	5.37877e-08	5.11956e-08	5.28574e-08	4.7651e-08	5.37877e-08
Propionic acid		biosphere3	air		biosphere	kilogram	3.4867e-09	5.113e-09	3.39296e-09	3.39296e-09	3.39296e-09	3.32507e-09	3.32507e-09	3.32507e-09	4.6958e-09	4.6958e-09	4.6958e-09	4.67239e-09	4.67239e-09	4.67239e-09	3.79603e-09	3.61087e-09	3.4257e-09	5.58846e-09	5.43228e-09	5.27611e-09	3.70284e-09	5.28574e-09	3.54933e-09	3.54933e-09	3.54933e-09	3.44621e-09	3.44621e-09	3.44621e-09	4.81583e-09	4.81583e-09	4.81583e-09	4.7651e-09	4.7651e-09	4.7651e-09	4.04361e-09	3.92117e-09	3.79873e-09	5.63797e-09	5.37877e-09	5.11956e-09	5.28574e-09	4.7651e-09	5.37877e-09
Sulfur dioxide		biosphere3	air		biosphere	kilogram	9.58829e-08	1.40606e-07	9.33053e-08	9.33053e-08	9.33053e-08	9.14381e-08	9.14381e-08	9.14381e-08	1.29133e-07	1.29133e-07	1.29133e-07	1.28489e-07	1.28489e-07	1.28489e-07	1.0439e-07	9.92975e-08	9.42055e-08	1.53681e-07	1.49386e-07	1.45091e-07	1.01827e-07	1.45356e-07	9.76052e-08	9.76052e-08	9.76052e-08	9.47695e-08	9.47695e-08	9.47695e-08	1.32434e-07	1.32434e-07	1.32434e-07	1.31039e-07	1.31039e-07	1.31039e-07	1.11198e-07	1.07831e-07	1.04464e-07	1.55042e-07	1.47914e-07	1.40786e-07	1.45356e-07	1.31039e-07	1.47914e-07
Toluene		biosphere3	air		biosphere	kilogram	3.4867e-08	5.113e-08	3.39296e-08	3.39296e-08	3.39296e-08	3.32507e-08	3.32507e-08	3.32507e-08	4.6958e-08	4.6958e-08	4.6958e-08	4.67239e-08	4.67239e-08	4.67239e-08	3.79603e-08	3.61087e-08	3.4257e-08	5.58846e-08	5.43228e-08	5.27611e-08	3.70284e-08	5.28574e-08	3.54933e-08	3.54933e-08	3.54933e-08	3.44621e-08	3.44621e-08	3.44621e-08	4.81583e-08	4.81583e-08	4.81583e-08	4.7651e-08	4.7651e-08	4.7651e-08	4.04361e-08	3.92117e-08	3.79873e-08	5.63797e-08	5.37877e-08	5.11956e-08	5.28574e-08	4.7651e-08	5.37877e-08
[truncated: 29 more columns]

## Sheet: DS creation_ATR
							ATR NG, HT+LT,	ATR NG, HT+LT, + CCS (MDEA), 90 (lower bound)	ATR NG, HT+LT, + CCS (MDEA), 90 (average)	ATR NG, HT+LT, + CCS (MDEA), 90 (upper bound)	ATR NG, HT+LT, + CCS (MDEA), 98 (lower bound)	ATR NG, HT+LT, + CCS (MDEA), 98 (average)	ATR NG, HT+LT, + CCS (MDEA), 98 (upper bound)	ATR NG, HT+LT, + CCS (VPSA), 98 (lower bound)	ATR NG, HT+LT, + CCS (VPSA), 98 (average)	ATR NG, HT+LT, + CCS (VPSA), 98 (upper bound)	ATR BM, HT+LT,	ATR BM, HT+LT, + CCS (MDEA), 90 (lower bound)	ATR BM, HT+LT, + CCS (MDEA), 90 (average)	ATR BM, HT+LT, + CCS (MDEA), 90 (upper bound)	ATR BM, HT+LT, + CCS (MDEA), 98 (lower bound)	ATR BM, HT+LT, + CCS (MDEA), 98 (average)	ATR BM, HT+LT, + CCS (MDEA), 98 (upper bound)	ATR BM, HT+LT, + CCS (VPSA), 98 (lower bound)	ATR BM, HT+LT, + CCS (VPSA), 98 (average)	ATR BM, HT+LT, + CCS (VPSA), 98 (upper bound)	ATR BM, HT+LT, maximum C uptake	ATR BM, HT+LT, + CCS (MDEA), 98 (average), maximum C uptake	ATR BM, HT+LT, + CCS (VPSA), 98 (average), maximum C uptake	ATR BM, HT+LT, with digestate incineration	ATR BM, HT+LT, + CCS (MDEA), 98 (average), digestate incineration	ATR BM, HT+LT, + CCS (VPSA), 98 (average), digestate incineration	ATR BM, HT+LT, cut-off approach	ATR BM, HT+LT, + CCS (MDEA), 98 (average), cut-off approach	ATR BM, HT+LT, + CCS (VPSA), 98 (average), cut-off approach	ATR NG, HT+LT, hydropower electricity	ATR NG, HT+LT, +CCS (VPSA), 98 (average), hydropower electricity	ATR BM, HT+LT, hydropower electricity	ATR BM, HT+LT, +CCS (VPSA), 98 (average), hydropower electricity	Comment
name	reference product	database	categories	location	type	unit	amount	amount	amount	amount	amount	amount	amount	amount	amount	amount	amount	amount	amount	amount	amount	amount	amount	amount	amount	amount	amount	amount	amount	amount	amount	amount	amount	amount	amount	amount	amount	amount	amount
Total energy input to reformer+furnace							1.30684	1.30684	1.30677	1.30671	1.30684	1.30685	1.30685	1.30721	1.3132	1.31919	1.30519	1.3052	1.3052	1.3052	1.3052	1.3052	1.3052	1.30571	1.31166	1.3176	1.30519	1.3052	1.31166	1.30519	1.3052	1.31166	1.3052	1.30571	1.31166	1.30684	1.3132	1.30519	1.31166
Hydrogen production, gaseous, 200 bar, from ATR	Hydrogen, gaseous, 200 bar	H2 from ATR		RER	production	megajoule	1	1	1	1	1	1	1	1	1	1	1	1	1	1	1	1	1	1	1	1	1	1	1	1	1	1	1	1	1	1	1	1	1
market group for natural gas, high pressure	natural gas, high pressure	ecoinvent 3.5 cutoff		Europe without Switzerland	technosphere	cubic meter	0.0326711	0.0326711	0.0326694	0.0326676	0.0326711	0.0326712	0.0326713	0.0326802	0.03283	0.0329798	0	0	0	0	0	0	0	0	0	0	0	0	0	0	0	0	0	0	0	0.0326711	0.03283	0	0	Input as feedstock
biomethane from biogas upgrading - biowaste - amine scrubbing, best - with biogenic carbon uptake, lower bound C sequestration, with C to soil from digestate	biomethane	Elegancy		CH	technosphere	cubic meter	0	0	0	0	0	0	0	0	0	0	0.0430316	0.043032	0.043032	0.043032	0.043032	0.043032	0.043032	0.0430486	0.0432448	0.0434409	0	0	0	0	0	0	0	0	0	0	0	0.0430316	0.0432448	Input as feedstock
biomethane from biogas upgrading - biowaste - amine scrubbing, best - with biogenic carbon uptake, upper bound C sequestration, with C to soil from digestate	biomethane	Elegancy		CH	technosphere	cubic meter	0	0	0	0	0	0	0	0	0	0	0	0	0	0	0	0	0	0	0	0	0.0430316	0.043032	0.0432448	0	0	0	0	0	0	0	0	0	0	Input as feedstock
biomethane from biogas upgrading - biowaste - amine scrubbing, best - with biogenic carbon uptake, lower bound C sequestration, digestate incineration	biomethane	Elegancy		CH	technosphere	cubic meter	0	0	0	0	0	0	0	0	0	0	0	0	0	0	0	0	0	0	0	0	0	0	0	0.0430316	0.043032	0.0432448	0	0	0	0	0	0	0	Input as feedstock
biomethane from biogas upgrading - biowaste - amine scrubbing, best - cut-off approach	biomethane	Elegancy		CH	technosphere	cubic meter	0	0	0	0	0	0	0	0	0	0	0	0	0	0	0	0	0	0	0	0	0	0	0	0	0	0	0.043032	0.0430486	0.0432448	0	0	0	0	Input as feedstock
market for liquid storage tank, chemicals, organics	liquid storage tank, chemicals, organics	ecoinvent 3.5 cutoff		GLO	technosphere	unit	2.1219e-11	2.1219e-11	2.1219e-11	2.1219e-11	2.1219e-11	2.1219e-11	2.1219e-11	2.1219e-11	2.1219e-11	2.1219e-11	2.1219e-11	2.1219e-11	2.1219e-11	2.1219e-11	2.1219e-11	2.1219e-11	2.1219e-11	2.1219e-11	2.1219e-11	2.1219e-11	2.1219e-11	2.1219e-11	2.1219e-11	2.1219e-11	2.1219e-11	2.1219e-11	2.1219e-11	2.1219e-11	2.1219e-11	2.1219e-11	2.1219e-11	2.1219e-11	2.1219e-11
chemical factory construction, organics	chemical factory, organics	ecoinvent 3.5 cutoff		RER	technosphere	unit	4.45729e-12	4.45729e-12	4.45705e-12	4.45682e-12	4.45729e-12	4.4573e-12	4.45731e-12	4.45716e-12	4.45709e-12	4.45701e-12	4.45701e-12	4.457e-12	4.457e-12	4.457e-12	4.457e-12	4.457e-12	4.457e-12	4.45702e-12	4.45699e-12	4.45696e-12	4.45701e-12	4.457e-12	4.45699e-12	4.45701e-12	4.457e-12	4.45699e-12	4.457e-12	4.45702e-12	4.45699e-12	4.45729e-12	4.45709e-12	4.45701e-12	4.45699e-12
market group for electricity, high voltage	electricity, high voltage	ecoinvent 3.5 cutoff		ENTSO-E	technosphere	kilowatt hour	0.00521701	0.00889543	0.0089279	0.00896037	0.00950232	0.00953569	0.00956907	0.0131341	0.0135371	0.0139401	0.00477664	0.00844404	0.00846077	0.00847749	0.00906211	0.00909546	0.00912882	0.0125735	0.0129794	0.0133852	0.00477664	0.00909546	0.0129794	0.00477664	0.00909546	0.0129794	0.00846077	0.0125735	0.0129794	0	0	0	0
electricity production, hydro, reservoir, alpine region	electricity, high voltage	ecoinvent 3.5 cutoff		CH	technosphere	kilowatt hour	0	0	0	0	0	0	0	0	0	0	0	0	0	0	0	0	0	0	0	0	0	0	0	0	0	0	0	0	0	0.00521701	0.0135371	0.00477664	0.0129794
market for water, deionised, from tap water, at user	water, deionised, from tap water, at user	ecoinvent 3.5 cutoff		Europe without Switzerland	technosphere	kilogram	0.0628251	0.0628251	0.0628218	0.0628185	0.0628251	0.0628253	0.0628255	0.0628233	0.0628223	0.0628213	0.0628212	0.0628211	0.0628211	0.0628211	0.0628211	0.0628211	0.0628211	0.0628213	0.0628209	0.0628205	0.0628212	0.0628211	0.0628209	0.0628212	0.0628211	0.0628209	0.0628211	0.0628213	0.0628209	0.0628251	0.0628223	0.0628212	0.0628209	Raw surface water input for steam production, with demineralisation. Water input only specified for few cases; values taken over for all other cases
Water, cooling, unspecified natural origin		biosphere3	natural resource::in water		biosphere	cubic meter	0.0031701	0.0031701	0.00316993	0.00316977	0.0031701	0.00317011	0.00317012	0.00317001	0.00316996	0.0031699	0.00316984	0.00316984	0.00316984	0.00316984	0.00316984	0.00316984	0.00316984	0.00316985	0.00316983	0.00316981	0.00316984	0.00316984	0.00316983	0.00316984	0.00316984	0.00316983	0.00316984	0.00316985	0.00316983	0.0031701	0.00316996	0.00316984	0.00316983
market for diethanolamine	diethanolamine	ecoinvent 3.5 cutoff		GLO	technosphere	kilogram	0	2.17121e-06	2.17109e-06	2.17098e-06	2.3642e-06	2.36421e-06	2.36421e-06	0	0	0	0	2.16441e-06	0	2.16441e-06	2.3568e-06	0	2.3568e-06	0	0	0	0	0	0	0	0	0	0	0	0	0	0	0	0
market for aluminium oxide	aluminium oxide	ecoinvent 3.5 cutoff		GLO	technosphere	kilogram	4.4394e-06	4.4394e-06	4.4394e-06	4.4394e-06	4.4394e-06	4.4394e-06	4.4394e-06	4.4394e-06	4.4394e-06	4.4394e-06	4.4394e-06	4.4394e-06	4.4394e-06	4.4394e-06	4.4394e-06	4.4394e-06	4.4394e-06	4.4394e-06	4.4394e-06	4.4394e-06	4.4394e-06	4.4394e-06	4.4394e-06	4.4394e-06	4.4394e-06	4.4394e-06	4.4394e-06	4.4394e-06	4.4394e-06	4.4394e-06	4.4394e-06	4.4394e-06	4.4394e-06	Al2O3; catalyst
market for molybdenum trioxide	molybdenum trioxide	ecoinvent 3.5 cutoff		GLO	technosphere	kilogram	1.39e-07	1.39e-07	1.39e-07	1.39e-07	1.39e-07	1.39e-07	1.39e-07	1.39e-07	1.39e-07	1.39e-07	1.39e-07	1.39e-07	1.39e-07	1.39e-07	1.39e-07	1.39e-07	1.39e-07	1.39e-07	1.39e-07	1.39e-07	1.39e-07	1.39e-07	1.39e-07	1.39e-07	1.39e-07	1.39e-07	1.39e-07	1.39e-07	1.39e-07	1.39e-07	1.39e-07	1.39e-07	1.39e-07	MoO3; catalyst
market for zinc oxide	zinc oxide	ecoinvent 3.5 cutoff		GLO	technosphere	kilogram	3.095e-06	3.095e-06	3.095e-06	3.095e-06	3.095e-06	3.095e-06	3.095e-06	3.095e-06	3.095e-06	3.095e-06	3.095e-06	3.095e-06	3.095e-06	3.095e-06	3.095e-06	3.095e-06	3.095e-06	3.095e-06	3.095e-06	3.095e-06	3.095e-06	3.095e-06	3.095e-06	3.095e-06	3.095e-06	3.095e-06	3.095e-06	3.095e-06	3.095e-06	3.095e-06	3.095e-06	3.095e-06	3.095e-06	ZnO; catalyst
market for quicklime, milled, packed	quicklime, milled, packed	ecoinvent 3.5 cutoff		RER	technosphere	kilogram	4e-07	4e-07	4e-07	4e-07	4e-07	4e-07	4e-07	4e-07	4e-07	4e-07	4e-07	4e-07	4e-07	4e-07	4e-07	4e-07	4e-07	4e-07	4e-07	4e-07	4e-07	4e-07	4e-07	4e-07	4e-07	4e-07	4e-07	4e-07	4e-07	4e-07	4e-07	4e-07	4e-07	CaO; catalyst
market for silica sand	silica sand	ecoinvent 3.5 cutoff		GLO	technosphere	kilogram	9.66e-08	9.66e-08	9.66e-08	9.66e-08	9.66e-08	9.66e-08	9.66e-08	9.66e-08	9.66e-08	9.66e-08	9.66e-08	9.66e-08	9.66e-08	9.66e-08	9.66e-08	9.66e-08	9.66e-08	9.66e-08	9.66e-08	9.66e-08	9.66e-08	9.66e-08	9.66e-08	9.66e-08	9.66e-08	9.66e-08	9.66e-08	9.66e-08	9.66e-08	9.66e-08	9.66e-08	9.66e-08	9.66e-08	SiO2; catalyst
market for chromium oxide, flakes	chromium oxide, flakes	ecoinvent 3.5 cutoff		GLO	technosphere	kilogram	3e-07	3e-07	3e-07	3e-07	3e-07	3e-07	3e-07	3e-07	3e-07	3e-07	3e-07	3e-07	3e-07	3e-07	3e-07	3e-07	3e-07	3e-07	3e-07	3e-07	3e-07	3e-07	3e-07	3e-07	3e-07	3e-07	3e-07	3e-07	3e-07	3e-07	3e-07	3e-07	3e-07	Cr2O3; catalyst
market for copper oxide	copper oxide	ecoinvent 3.5 cutoff		GLO	technosphere	kilogram	3.02e-06	3.02e-06	3.02e-06	3.02e-06	3.02e-06	3.02e-06	3.02e-06	3.02e-06	3.02e-06	3.02e-06	3.02e-06	3.02e-06	3.02e-06	3.02e-06	3.02e-06	3.02e-06	3.02e-06	3.02e-06	3.02e-06	3.02e-06	3.02e-06	3.02e-06	3.02e-06	3.02e-06	3.02e-06	3.02e-06	3.02e-06	3.02e-06	3.02e-06	3.02e-06	3.02e-06	3.02e-06	3.02e-06	CuO; catalyst
market for magnesium oxide	magnesium oxide	ecoinvent 3.5 cutoff		GLO	technosphere	kilogram	2.33e-07	2.33e-07	2.33e-07	2.33e-07	2.33e-07	2.33e-07	2.33e-07	2.33e-07	2.33e-07	2.33e-07	2.33e-07	2.33e-07	2.33e-07	2.33e-07	2.33e-07	2.33e-07	2.33e-07	2.33e-07	2.33e-07	2.33e-07	2.33e-07	2.33e-07	2.33e-07	2.33e-07	2.33e-07	2.33e-07	2.33e-07	2.33e-07	2.33e-07	2.33e-07	2.33e-07	2.33e-07	2.33e-07	MgO; catalyst
market for portafer	portafer	ecoinvent 3.5 cutoff		GLO	technosphere	kilogram	2.603e-06	2.603e-06	2.603e-06	2.603e-06	2.603e-06	2.603e-06	2.603e-06	2.603e-06	2.603e-06	2.603e-06	2.603e-06	2.603e-06	2.603e-06	2.603e-06	2.603e-06	2.603e-06	2.603e-06	2.603e-06	2.603e-06	2.603e-06	2.603e-06	2.603e-06	2.603e-06	2.603e-06	2.603e-06	2.603e-06	2.603e-06	2.603e-06	2.603e-06	2.603e-06	2.603e-06	2.603e-06	2.603e-06	Fe2O3; catalyst
market for nickel, 99.5%	nickel, 99.5%	ecoinvent 3.5 cutoff		GLO	technosphere	kilogram	1.691e-06	1.691e-06	1.691e-06	1.691e-06	1.691e-06	1.691e-06	1.691e-06	1.691e-06	1.691e-06	1.691e-06	1.691e-06	1.691e-06	1.691e-06	1.691e-06	1.691e-06	1.691e-06	1.691e-06	1.691e-06	1.691e-06	1.691e-06	1.691e-06	1.691e-06	1.691e-06	1.691e-06	1.691e-06	1.691e-06	1.691e-06	1.691e-06	1.691e-06	1.691e-06	1.691e-06	1.691e-06	1.691e-06	represent NiO; catalyst, although the energy consumption for producing NiO is not considered.
market for zeolite, powder	zeolite, powder	ecoinvent 3.5 cutoff		GLO	technosphere	kilogram	7.35751e-06	7.35751e-06	7.35751e-06	7.35751e-06	7.35751e-06	7.35751e-06	7.35751e-06	7.35751e-06	7.35751e-06	7.35751e-06	7.35751e-06	7.35751e-06	7.35751e-06	7.35751e-06	7.35751e-06	7.35751e-06	7.35751e-06	7.35751e-06	7.35751e-06	7.35751e-06	7.35751e-06	7.35751e-06	7.35751e-06	7.35751e-06	7.35751e-06	7.35751e-06	7.35751e-06	7.35751e-06	7.35751e-06	7.35751e-06	7.35751e-06	7.35751e-06	7.35751e-06	absorbent in the PSA process
CO2 storage and transport 200km pipeline, storage 1000m/2025	CO2 storage and transport 200km pipeline, storage 1000m/2025	Elegancy		RER	technosphere	kilogram	0	0.063859	0.0638556	0.0638522	0.0695353	0.0695355	0.0695357	0.0709494	0.0712718	0.0715943	0	0.0636592	0.0636592	0.0636592	0.0693178	0.0693178	0.0693178	0.0707137	0.0710385	0.0713634	0	0.0693178	0.0710385	0	0.0693178	0.0710385	0.0636592	0.0707137	0.0710385	0	0.0712718	0	0.0710385	CO2 transport and storage; taken from CARMA dataset "CO2 storage/100% SNG, post, 200km pipeline, storage 1000m/2025"
carbon dioxide, fossil		biosphere3	air		biosphere	kilogram	0.0748903	0.0105791	0.0105791	0.0105791	0.0049032	0.0049032	0.0049032	0.00157281	0.00159137	0.00160992	0	0	0	0	0	0	0	0	0	0	0	0	0	0	0	0	0	0	0	0.0748903	0.00159137	0	0	Direct emissions of CO2
Carbon dioxide, from soil or biomass stock		biosphere3	air		biosphere	kilogram	0	0	0	0	0	0	0	0	0	0	0.0740356	0.0103782	0.0103782	0.0103782	0.0047197	0.0047197	0.0047197	0.00142017	0.0014239	0.00142764	0.0740356	0.0047197	0.0014239	0.0740356	0.0047197	0.0014239	0.0103782	0.00142017	0.0014239	0	0	0.0740356	0.0014239	Direct emissions of CO2
Nitrogen oxides		biosphere3	air		biosphere	kilogram	2.49973e-05	2.49973e-05	2.49973e-05	2.49973e-05	2.49973e-05	2.49973e-05	2.49973e-05	2.49973e-05	2.49973e-05	2.49973e-05	2.49973e-05	2.49973e-05	2.49973e-05	2.49973e-05	2.49973e-05	2.49973e-05	2.49973e-05	2.49973e-05	2.49973e-05	2.49973e-05	2.49973e-05	2.49973e-05	2.49973e-05	2.49973e-05	2.49973e-05	2.49973e-05	2.49973e-05	2.49973e-05	2.49973e-05	2.49973e-05	2.49973e-05	2.49973e-05	2.49973e-05

## Sheet: LCIA
Impact cat	Activity	Contribution cat	Score
('cumulative energy demand', 'fossil', 'non-renewable energy resources, fossil')	'ATR BM, HT+LT' (megajoule, CH, None)	Catalysts&adsorbents	0.00104087
('cumulative energy demand', 'fossil', 'non-renewable energy resources, fossil')	'ATR BM, HT+LT' (megajoule, CH, None)	Direct CO2 emissions	0
('cumulative energy demand', 'fossil', 'non-renewable energy resources, fossil')	'ATR BM, HT+LT' (megajoule, CH, None)	Electricity from/to grid	0.0234226
('cumulative energy demand', 'fossil', 'non-renewable energy resources, fossil')	'ATR BM, HT+LT' (megajoule, CH, None)	Emissions from fuel burning in furnace	0
('cumulative energy demand', 'fossil', 'non-renewable energy resources, fossil')	'ATR BM, HT+LT' (megajoule, CH, None)	Fuel supply chain	0.116945
('cumulative energy demand', 'fossil', 'non-renewable energy resources, fossil')	'ATR BM, HT+LT' (megajoule, CH, None)	Plant infrastructure	0.00693808
('cumulative energy demand', 'fossil', 'non-renewable energy resources, fossil')	'ATR BM, HT+LT' (megajoule, CH, None)	Water supply	0.000277399
('cumulative energy demand', 'nuclear', 'non-renewable energy resources, nuclear')	'ATR BM, HT+LT' (megajoule, CH, None)	Catalysts&adsorbents	8.69457e-05
('cumulative energy demand', 'nuclear', 'non-renewable energy resources, nuclear')	'ATR BM, HT+LT' (megajoule, CH, None)	Direct CO2 emissions	0
('cumulative energy demand', 'nuclear', 'non-renewable energy resources, nuclear')	'ATR BM, HT+LT' (megajoule, CH, None)	Electricity from/to grid	0.0184825
('cumulative energy demand', 'nuclear', 'non-renewable energy resources, nuclear')	'ATR BM, HT+LT' (megajoule, CH, None)	Emissions from fuel burning in furnace	0
('cumulative energy demand', 'nuclear', 'non-renewable energy resources, nuclear')	'ATR BM, HT+LT' (megajoule, CH, None)	Fuel supply chain	0.0311949
('cumulative energy demand', 'nuclear', 'non-renewable energy resources, nuclear')	'ATR BM, HT+LT' (megajoule, CH, None)	Plant infrastructure	0.00171998
('cumulative energy demand', 'nuclear', 'non-renewable energy resources, nuclear')	'ATR BM, HT+LT' (megajoule, CH, None)	Water supply	5.86473e-05
('cumulative energy demand', 'primary forest', 'non-renewable energy resources, primary forest')	'ATR BM, HT+LT' (megajoule, CH, None)	Catalysts&adsorbents	2.14448e-08
('cumulative energy demand', 'primary forest', 'non-renewable energy resources, primary forest')	'ATR BM, HT+LT' (megajoule, CH, None)	Direct CO2 emissions	0
('cumulative energy demand', 'primary forest', 'non-renewable energy resources, primary forest')	'ATR BM, HT+LT' (megajoule, CH, None)	Electricity from/to grid	1.63008e-07
('cumulative energy demand', 'primary forest', 'non-renewable energy resources, primary forest')	'ATR BM, HT+LT' (megajoule, CH, None)	Emissions from fuel burning in furnace	0
('cumulative energy demand', 'primary forest', 'non-renewable energy resources, primary forest')	'ATR BM, HT+LT' (megajoule, CH, None)	Fuel supply chain	2.08206e-06
('cumulative energy demand', 'primary forest', 'non-renewable energy resources, primary forest')	'ATR BM, HT+LT' (megajoule, CH, None)	Plant infrastructure	3.70972e-07
('cumulative energy demand', 'primary forest', 'non-renewable energy resources, primary forest')	'ATR BM, HT+LT' (megajoule, CH, None)	Water supply	4.68064e-09
('ILCD 2.0 2018 midpoint', 'climate change', 'climate change total')	'ATR BM, HT+LT' (megajoule, CH, None)	Catalysts&adsorbents	9.12173e-05
('ILCD 2.0 2018 midpoint', 'climate change', 'climate change total')	'ATR BM, HT+LT' (megajoule, CH, None)	Direct CO2 emissions	0.0740356
('ILCD 2.0 2018 midpoint', 'climate change', 'climate change total')	'ATR BM, HT+LT' (megajoule, CH, None)	Electricity from/to grid	0.00193925
('ILCD 2.0 2018 midpoint', 'climate change', 'climate change total')	'ATR BM, HT+LT' (megajoule, CH, None)	Emissions from fuel burning in furnace	0
('ILCD 2.0 2018 midpoint', 'climate change', 'climate change total')	'ATR BM, HT+LT' (megajoule, CH, None)	Fuel supply chain	-0.10038
('ILCD 2.0 2018 midpoint', 'climate change', 'climate change total')	'ATR BM, HT+LT' (megajoule, CH, None)	Plant infrastructure	0.000631281
('ILCD 2.0 2018 midpoint', 'climate change', 'climate change total')	'ATR BM, HT+LT' (megajoule, CH, None)	Water supply	2.27993e-05
('ILCD 2.0 2018 midpoint', 'ecosystem quality', 'freshwater and terrestrial acidification')	'ATR BM, HT+LT' (megajoule, CH, None)	Catalysts&adsorbents	7.85337e-06
('ILCD 2.0 2018 midpoint', 'ecosystem quality', 'freshwater and terrestrial acidification')	'ATR BM, HT+LT' (megajoule, CH, None)	Direct CO2 emissions	0
('ILCD 2.0 2018 midpoint', 'ecosystem quality', 'freshwater and terrestrial acidification')	'ATR BM, HT+LT' (megajoule, CH, None)	Electricity from/to grid	1.00326e-05
('ILCD 2.0 2018 midpoint', 'ecosystem quality', 'freshwater and terrestrial acidification')	'ATR BM, HT+LT' (megajoule, CH, None)	Emissions from fuel burning in furnace	1.8498e-05
('ILCD 2.0 2018 midpoint', 'ecosystem quality', 'freshwater and terrestrial acidification')	'ATR BM, HT+LT' (megajoule, CH, None)	Fuel supply chain	0.000125074
('ILCD 2.0 2018 midpoint', 'ecosystem quality', 'freshwater and terrestrial acidification')	'ATR BM, HT+LT' (megajoule, CH, None)	Plant infrastructure	7.89893e-06
('ILCD 2.0 2018 midpoint', 'ecosystem quality', 'freshwater and terrestrial acidification')	'ATR BM, HT+LT' (megajoule, CH, None)	Water supply	2.47425e-07
('ILCD 2.0 2018 midpoint', 'ecosystem quality', 'freshwater ecotoxicity')	'ATR BM, HT+LT' (megajoule, CH, None)	Catalysts&adsorbents	0.000628182
('ILCD 2.0 2018 midpoint', 'ecosystem quality', 'freshwater ecotoxicity')	'ATR BM, HT+LT' (megajoule, CH, None)	Direct CO2 emissions	0
('ILCD 2.0 2018 midpoint', 'ecosystem quality', 'freshwater ecotoxicity')	'ATR BM, HT+LT' (megajoule, CH, None)	Electricity from/to grid	0.000488377
('ILCD 2.0 2018 midpoint', 'ecosystem quality', 'freshwater ecotoxicity')	'ATR BM, HT+LT' (megajoule, CH, None)	Emissions from fuel burning in furnace	0
('ILCD 2.0 2018 midpoint', 'ecosystem quality', 'freshwater ecotoxicity')	'ATR BM, HT+LT' (megajoule, CH, None)	Fuel supply chain	0.0123107
('ILCD 2.0 2018 midpoint', 'ecosystem quality', 'freshwater ecotoxicity')	'ATR BM, HT+LT' (megajoule, CH, None)	Plant infrastructure	0.00217872
('ILCD 2.0 2018 midpoint', 'ecosystem quality', 'freshwater ecotoxicity')	'ATR BM, HT+LT' (megajoule, CH, None)	Water supply	3.7633e-05
('ILCD 2.0 2018 midpoint', 'ecosystem quality', 'marine eutrophication')	'ATR BM, HT+LT' (megajoule, CH, None)	Catalysts&adsorbents	2.43506e-07
('ILCD 2.0 2018 midpoint', 'ecosystem quality', 'marine eutrophication')	'ATR BM, HT+LT' (megajoule, CH, None)	Direct CO2 emissions	0
('ILCD 2.0 2018 midpoint', 'ecosystem quality', 'marine eutrophication')	'ATR BM, HT+LT' (megajoule, CH, None)	Electricity from/to grid	1.73375e-06
('ILCD 2.0 2018 midpoint', 'ecosystem quality', 'marine eutrophication')	'ATR BM, HT+LT' (megajoule, CH, None)	Emissions from fuel burning in furnace	9.72394e-06
('ILCD 2.0 2018 midpoint', 'ecosystem quality', 'marine eutrophication')	'ATR BM, HT+LT' (megajoule, CH, None)	Fuel supply chain	1.03926e-05
('ILCD 2.0 2018 midpoint', 'ecosystem quality', 'marine eutrophication')	'ATR BM, HT+LT' (megajoule, CH, None)	Plant infrastructure	8.83642e-07
('ILCD 2.0 2018 midpoint', 'ecosystem quality', 'marine eutrophication')	'ATR BM, HT+LT' (megajoule, CH, None)	Water supply	2.4094e-08
('ILCD 2.0 2018 midpoint', 'ecosystem quality', 'terrestrial eutrophication')	'ATR BM, HT+LT' (megajoule, CH, None)	Catalysts&adsorbents	3.26269e-06
('ILCD 2.0 2018 midpoint', 'ecosystem quality', 'terrestrial eutrophication')	'ATR BM, HT+LT' (megajoule, CH, None)	Direct CO2 emissions	0
('ILCD 2.0 2018 midpoint', 'ecosystem quality', 'terrestrial eutrophication')	'ATR BM, HT+LT' (megajoule, CH, None)	Electricity from/to grid	1.60972e-05
('ILCD 2.0 2018 midpoint', 'ecosystem quality', 'terrestrial eutrophication')	'ATR BM, HT+LT' (megajoule, CH, None)	Emissions from fuel burning in furnace	0.000106488
('ILCD 2.0 2018 midpoint', 'ecosystem quality', 'terrestrial eutrophication')	'ATR BM, HT+LT' (megajoule, CH, None)	Fuel supply chain	0.000183952
('ILCD 2.0 2018 midpoint', 'ecosystem quality', 'terrestrial eutrophication')	'ATR BM, HT+LT' (megajoule, CH, None)	Plant infrastructure	1.03808e-05
('ILCD 2.0 2018 midpoint', 'ecosystem quality', 'terrestrial eutrophication')	'ATR BM, HT+LT' (megajoule, CH, None)	Water supply	2.44598e-07
('ILCD 2.0 2018 midpoint', 'human health', 'carcinogenic effects')	'ATR BM, HT+LT' (megajoule, CH, None)	Catalysts&adsorbents	2.32399e-11
('ILCD 2.0 2018 midpoint', 'human health', 'carcinogenic effects')	'ATR BM, HT+LT' (megajoule, CH, None)	Direct CO2 emissions	0
('ILCD 2.0 2018 midpoint', 'human health', 'carcinogenic effects')	'ATR BM, HT+LT' (megajoule, CH, None)	Electricity from/to grid	1.32948e-11
('ILCD 2.0 2018 midpoint', 'human health', 'carcinogenic effects')	'ATR BM, HT+LT' (megajoule, CH, None)	Emissions from fuel burning in furnace	0
('ILCD 2.0 2018 midpoint', 'human health', 'carcinogenic effects')	'ATR BM, HT+LT' (megajoule, CH, None)	Fuel supply chain	3.46694e-10
('ILCD 2.0 2018 midpoint', 'human health', 'carcinogenic effects')	'ATR BM, HT+LT' (megajoule, CH, None)	Plant infrastructure	7.30489e-11
('ILCD 2.0 2018 midpoint', 'human health', 'carcinogenic effects')	'ATR BM, HT+LT' (megajoule, CH, None)	Water supply	9.08747e-13
('ILCD 2.0 2018 midpoint', 'human health', 'ionising radiation')	'ATR BM, HT+LT' (megajoule, CH, None)	Catalysts&adsorbents	6.50284e-06
('ILCD 2.0 2018 midpoint', 'human health', 'ionising radiation')	'ATR BM, HT+LT' (megajoule, CH, None)	Direct CO2 emissions	0
('ILCD 2.0 2018 midpoint', 'human health', 'ionising radiation')	'ATR BM, HT+LT' (megajoule, CH, None)	Electricity from/to grid	0.00107189
('ILCD 2.0 2018 midpoint', 'human health', 'ionising radiation')	'ATR BM, HT+LT' (megajoule, CH, None)	Emissions from fuel burning in furnace	0
('ILCD 2.0 2018 midpoint', 'human health', 'ionising radiation')	'ATR BM, HT+LT' (megajoule, CH, None)	Fuel supply chain	0.00205998
('ILCD 2.0 2018 midpoint', 'human health', 'ionising radiation')	'ATR BM, HT+LT' (megajoule, CH, None)	Plant infrastructure	0.000106411
('ILCD 2.0 2018 midpoint', 'human health', 'ionising radiation')	'ATR BM, HT+LT' (megajoule, CH, None)	Water supply	3.82124e-06
('ILCD 2.0 2018 midpoint', 'human health', 'non-carcinogenic effects')	'ATR BM, HT+LT' (megajoule, CH, None)	Catalysts&adsorbents	1.68319e-10
('ILCD 2.0 2018 midpoint', 'human health', 'non-carcinogenic effects')	'ATR BM, HT+LT' (megajoule, CH, None)	Direct CO2 emissions	0
('ILCD 2.0 2018 midpoint', 'human health', 'non-carcinogenic effects')	'ATR BM, HT+LT' (megajoule, CH, None)	Electricity from/to grid	1.92667e-10
('ILCD 2.0 2018 midpoint', 'human health', 'non-carcinogenic effects')	'ATR BM, HT+LT' (megajoule, CH, None)	Emissions from fuel burning in furnace	0
('ILCD 2.0 2018 midpoint', 'human health', 'non-carcinogenic effects')	'ATR BM, HT+LT' (megajoule, CH, None)	Fuel supply chain	3.21404e-09
('ILCD 2.0 2018 midpoint', 'human health', 'non-carcinogenic effects')	'ATR BM, HT+LT' (megajoule, CH, None)	Plant infrastructure	5.72602e-10
('ILCD 2.0 2018 midpoint', 'human health', 'non-carcinogenic effects')	'ATR BM, HT+LT' (megajoule, CH, None)	Water supply	6.85549e-12
('ILCD 2.0 2018 midpoint', 'human health', 'ozone layer depletion')	'ATR BM, HT+LT' (megajoule, CH, None)	Catalysts&adsorbents	1.38511e-11
('ILCD 2.0 2018 midpoint', 'human health', 'ozone layer depletion')	'ATR BM, HT+LT' (megajoule, CH, None)	Direct CO2 emissions	0
('ILCD 2.0 2018 midpoint', 'human health', 'ozone layer depletion')	'ATR BM, HT+LT' (megajoule, CH, None)	Electricity from/to grid	1.66034e-10
('ILCD 2.0 2018 midpoint', 'human health', 'ozone layer depletion')	'ATR BM, HT+LT' (megajoule, CH, None)	Emissions from fuel burning in furnace	0
('ILCD 2.0 2018 midpoint', 'human health', 'ozone layer depletion')	'ATR BM, HT+LT' (megajoule, CH, None)	Fuel supply chain	9.73194e-10
('ILCD 2.0 2018 midpoint', 'human health', 'ozone layer depletion')	'ATR BM, HT+LT' (megajoule, CH, None)	Plant infrastructure	4.70936e-11
('ILCD 2.0 2018 midpoint', 'human health', 'ozone layer depletion')	'ATR BM, HT+LT' (megajoule, CH, None)	Water supply	1.53782e-11
('ILCD 2.0 2018 midpoint', 'human health', 'photochemical ozone creation')	'ATR BM, HT+LT' (megajoule, CH, None)	Catalysts&adsorbents	1.11653e-06
('ILCD 2.0 2018 midpoint', 'human health', 'photochemical ozone creation')	'ATR BM, HT+LT' (megajoule, CH, None)	Direct CO2 emissions	0
('ILCD 2.0 2018 midpoint', 'human health', 'photochemical ozone creation')	'ATR BM, HT+LT' (megajoule, CH, None)	Electricity from/to grid	3.99202e-06
('ILCD 2.0 2018 midpoint', 'human health', 'photochemical ozone creation')	'ATR BM, HT+LT' (megajoule, CH, None)	Emissions from fuel burning in furnace	2.49973e-05
('ILCD 2.0 2018 midpoint', 'human health', 'photochemical ozone creation')	'ATR BM, HT+LT' (megajoule, CH, None)	Fuel supply chain	3.26023e-05
('ILCD 2.0 2018 midpoint', 'human health', 'photochemical ozone creation')	'ATR BM, HT+LT' (megajoule, CH, None)	Plant infrastructure	2.9728e-06
('ILCD 2.0 2018 midpoint', 'human health', 'photochemical ozone creation')	'ATR BM, HT+LT' (megajoule, CH, None)	Water supply	7.74426e-08
('ILCD 2.0 2018 midpoint', 'human health', 'respiratory effects, inorganics')	'ATR BM, HT+LT' (megajoule, CH, None)	Catalysts&adsorbents	1.45044e-11
('ILCD 2.0 2018 midpoint', 'human health', 'respiratory effects, inorganics')	'ATR BM, HT+LT' (megajoule, CH, None)	Direct CO2 emissions	0
('ILCD 2.0 2018 midpoint', 'human health', 'respiratory effects, inorganics')	'ATR BM, HT+LT' (megajoule, CH, None)	Electricity from/to grid	2.93575e-11
('ILCD 2.0 2018 midpoint', 'human health', 'respiratory effects, inorganics')	'ATR BM, HT+LT' (megajoule, CH, None)	Emissions from fuel burning in furnace	3.99956e-11
('ILCD 2.0 2018 midpoint', 'human health', 'respiratory effects, inorganics')	'ATR BM, HT+LT' (megajoule, CH, None)	Fuel supply chain	8.93622e-10
('ILCD 2.0 2018 midpoint', 'human health', 'respiratory effects, inorganics')	'ATR BM, HT+LT' (megajoule, CH, None)	Plant infrastructure	4.70315e-11
('ILCD 2.0 2018 midpoint', 'human health', 'respiratory effects, inorganics')	'ATR BM, HT+LT' (megajoule, CH, None)	Water supply	1.74323e-12
('ILCD 2.0 2018 midpoint', 'resources', 'fossils')	'ATR BM, HT+LT' (megajoule, CH, None)	Catalysts&adsorbents	0.00122557
('ILCD 2.0 2018 midpoint', 'resources', 'fossils')	'ATR BM, HT+LT' (megajoule, CH, None)	Direct CO2 emissions	0
('ILCD 2.0 2018 midpoint', 'resources', 'fossils')	'ATR BM, HT+LT' (megajoule, CH, None)	Electricity from/to grid	0.0451489
('ILCD 2.0 2018 midpoint', 'resources', 'fossils')	'ATR BM, HT+LT' (megajoule, CH, None)	Emissions from fuel burning in furnace	0
('ILCD 2.0 2018 midpoint', 'resources', 'fossils')	'ATR BM, HT+LT' (megajoule, CH, None)	Fuel supply chain	0.158315
('ILCD 2.0 2018 midpoint', 'resources', 'fossils')	'ATR BM, HT+LT' (megajoule, CH, None)	Plant infrastructure	0.00956904
('ILCD 2.0 2018 midpoint', 'resources', 'fossils')	'ATR BM, HT+LT' (megajoule, CH, None)	Water supply	0.000352255
('ILCD 2.0 2018 midpoint', 'resources', 'land use')	'ATR BM, HT+LT' (megajoule, CH, None)	Catalysts&adsorbents	0.00112991
('ILCD 2.0 2018 midpoint', 'resources', 'land use')	'ATR BM, HT+LT' (megajoule, CH, None)	Direct CO2 emissions	0
('ILCD 2.0 2018 midpoint', 'resources', 'land use')	'ATR BM, HT+LT' (megajoule, CH, None)	Electricity from/to grid	0.019842
('ILCD 2.0 2018 midpoint', 'resources', 'land use')	'ATR BM, HT+LT' (megajoule, CH, None)	Emissions from fuel burning in furnace	0
('ILCD 2.0 2018 midpoint', 'resources', 'land use')	'ATR BM, HT+LT' (megajoule, CH, None)	Fuel supply chain	0.140779
('ILCD 2.0 2018 midpoint', 'resources', 'land use')	'ATR BM, HT+LT' (megajoule, CH, None)	Plant infrastructure	0.0215588
('ILCD 2.0 2018 midpoint', 'resources', 'land use')	'ATR BM, HT+LT' (megajoule, CH, None)	Water supply	0.000178246
('ILCD 2.0 2018 midpoint', 'resources', 'minerals and metals')	'ATR BM, HT+LT' (megajoule, CH, None)	Catalysts&adsorbents	1.55187e-08
('ILCD 2.0 2018 midpoint', 'resources', 'minerals and metals')	'ATR BM, HT+LT' (megajoule, CH, None)	Direct CO2 emissions	0
('ILCD 2.0 2018 midpoint', 'resources', 'minerals and metals')	'ATR BM, HT+LT' (megajoule, CH, None)	Electricity from/to grid	4.5058e-09
('ILCD 2.0 2018 midpoint', 'resources', 'minerals and metals')	'ATR BM, HT+LT' (megajoule, CH, None)	Emissions from fuel burning in furnace	0
('ILCD 2.0 2018 midpoint', 'resources', 'minerals and metals')	'ATR BM, HT+LT' (megajoule, CH, None)	Fuel supply chain	1.2466e-06
('ILCD 2.0 2018 midpoint', 'resources', 'minerals and metals')	'ATR BM, HT+LT' (megajoule, CH, None)	Plant infrastructure	1.81183e-07
('ILCD 2.0 2018 midpoint', 'resources', 'minerals and metals')	'ATR BM, HT+LT' (megajoule, CH, None)	Water supply	6.7666e-10
('ReCiPe Midpoint (H) V1.13', 'metal depletion', 'MDP')	'ATR BM, HT+LT' (megajoule, CH, None)	Catalysts&adsorbents	0.00028327
('ReCiPe Midpoint (H) V1.13', 'metal depletion', 'MDP')	'ATR BM, HT+LT' (megajoule, CH, None)	Direct CO2 emissions	0
('ReCiPe Midpoint (H) V1.13', 'metal depletion', 'MDP')	'ATR BM, HT+LT' (megajoule, CH, None)	Electricity from/to grid	1.61829e-05
('ReCiPe Midpoint (H) V1.13', 'metal depletion', 'MDP')	'ATR BM, HT+LT' (megajoule, CH, None)	Emissions from fuel burning in furnace	0
('ReCiPe Midpoint (H) V1.13', 'metal depletion', 'MDP')	'ATR BM, HT+LT' (megajoule, CH, None)	Fuel supply chain	0.0031838
('ReCiPe Midpoint (H) V1.13', 'metal depletion', 'MDP')	'ATR BM, HT+LT' (megajoule, CH, None)	Plant infrastructure	0.000575175
('ReCiPe Midpoint (H) V1.13', 'metal depletion', 'MDP')	'ATR BM, HT+LT' (megajoule, CH, None)	Water supply	2.07628e-06
('cumulative energy demand', 'fossil', 'non-renewable energy resources, fossil')	'ATR BM, HT+LT, + CCS (MDEA), 98 (average), cut-off approach' (megajoule, CH, None)	Catalysts&adsorbents	0.00104087
('cumulative energy demand', 'fossil', 'non-renewable energy resources, fossil')	'ATR BM, HT+LT, + CCS (MDEA), 98 (average), cut-off approach' (megajoule, CH, None)	CO2 transport and storage	0.00354802
('cumulative energy demand', 'fossil', 'non-renewable energy resources, fossil')	'ATR BM, HT+LT, + CCS (MDEA), 98 (average), cut-off approach' (megajoule, CH, None)	Direct CO2 emissions	0
('cumulative energy demand', 'fossil', 'non-renewable energy resources, fossil')	'ATR BM, HT+LT, + CCS (MDEA), 98 (average), cut-off approach' (megajoule, CH, None)	Electricity from/to grid	0.0616552
('cumulative energy demand', 'fossil', 'non-renewable energy resources, fossil')	'ATR BM, HT+LT, + CCS (MDEA), 98 (average), cut-off approach' (megajoule, CH, None)	Emissions from fuel burning in furnace	0
('cumulative energy demand', 'fossil', 'non-renewable energy resources, fossil')	'ATR BM, HT+LT, + CCS (MDEA), 98 (average), cut-off approach' (megajoule, CH, None)	Fuel supply chain	0.116991
('cumulative energy demand', 'fossil', 'non-renewable energy resources, fossil')	'ATR BM, HT+LT, + CCS (MDEA), 98 (average), cut-off approach' (megajoule, CH, None)	Plant infrastructure	0.00693809
('cumulative energy demand', 'fossil', 'non-renewable energy resources, fossil')	'ATR BM, HT+LT, + CCS (MDEA), 98 (average), cut-off approach' (megajoule, CH, None)	Water supply	0.0002774
('cumulative energy demand', 'nuclear', 'non-renewable energy resources, nuclear')	'ATR BM, HT+LT, + CCS (MDEA), 98 (average), cut-off approach' (megajoule, CH, None)	Catalysts&adsorbents	8.69457e-05
('cumulative energy demand', 'nuclear', 'non-renewable energy resources, nuclear')	'ATR BM, HT+LT, + CCS (MDEA), 98 (average), cut-off approach' (megajoule, CH, None)	CO2 transport and storage	0.0026844
('cumulative energy demand', 'nuclear', 'non-renewable energy resources, nuclear')	'ATR BM, HT+LT, + CCS (MDEA), 98 (average), cut-off approach' (megajoule, CH, None)	Direct CO2 emissions	0
('cumulative energy demand', 'nuclear', 'non-renewable energy resources, nuclear')	'ATR BM, HT+LT, + CCS (MDEA), 98 (average), cut-off approach' (megajoule, CH, None)	Electricity from/to grid	0.0486513
('cumulative energy demand', 'nuclear', 'non-renewable energy resources, nuclear')	'ATR BM, HT+LT, + CCS (MDEA), 98 (average), cut-off approach' (megajoule, CH, None)	Emissions from fuel burning in furnace	0
('cumulative energy demand', 'nuclear', 'non-renewable energy resources, nuclear')	'ATR BM, HT+LT, + CCS (MDEA), 98 (average), cut-off approach' (megajoule, CH, None)	Fuel supply chain	0.0312073
('cumulative energy demand', 'nuclear', 'non-renewable energy resources, nuclear')	'ATR BM, HT+LT, + CCS (MDEA), 98 (average), cut-off approach' (megajoule, CH, None)	Plant infrastructure	0.00171998
('cumulative energy demand', 'nuclear', 'non-renewable energy resources, nuclear')	'ATR BM, HT+LT, + CCS (MDEA), 98 (average), cut-off approach' (megajoule, CH, None)	Water supply	5.86473e-05
('cumulative energy demand', 'primary forest', 'non-renewable energy resources, primary forest')	'ATR BM, HT+LT, + CCS (MDEA), 98 (average), cut-off approach' (megajoule, CH, None)	Catalysts&adsorbents	2.14448e-08
('cumulative energy demand', 'primary forest', 'non-renewable energy resources, primary forest')	'ATR BM, HT+LT, + CCS (MDEA), 98 (average), cut-off approach' (megajoule, CH, None)	CO2 transport and storage	5.22357e-08
('cumulative energy demand', 'primary forest', 'non-renewable energy resources, primary forest')	'ATR BM, HT+LT, + CCS (MDEA), 98 (average), cut-off approach' (megajoule, CH, None)	Direct CO2 emissions	0
('cumulative energy demand', 'primary forest', 'non-renewable energy resources, primary forest')	'ATR BM, HT+LT, + CCS (MDEA), 98 (average), cut-off approach' (megajoule, CH, None)	Electricity from/to grid	4.29085e-07
('cumulative energy demand', 'primary forest', 'non-renewable energy resources, primary forest')	'ATR BM, HT+LT, + CCS (MDEA), 98 (average), cut-off approach' (megajoule, CH, None)	Emissions from fuel burning in furnace	0
('cumulative energy demand', 'primary forest', 'non-renewable energy resources, primary forest')	'ATR BM, HT+LT, + CCS (MDEA), 98 (average), cut-off approach' (megajoule, CH, None)	Fuel supply chain	2.08289e-06
('cumulative energy demand', 'primary forest', 'non-renewable energy resources, primary forest')	'ATR BM, HT+LT, + CCS (MDEA), 98 (average), cut-off approach' (megajoule, CH, None)	Plant infrastructure	3.70973e-07
('cumulative energy demand', 'primary forest', 'non-renewable energy resources, primary forest')	'ATR BM, HT+LT, + CCS (MDEA), 98 (average), cut-off approach' (megajoule, CH, None)	Water supply	4.68064e-09
('ILCD 2.0 2018 midpoint', 'climate change', 'climate change total')	'ATR BM, HT+LT, + CCS (MDEA), 98 (average), cut-off approach' (megajoule, CH, None)	Catalysts&adsorbents	9.12173e-05
('ILCD 2.0 2018 midpoint', 'climate change', 'climate change total')	'ATR BM, HT+LT, + CCS (MDEA), 98 (average), cut-off approach' (megajoule, CH, None)	CO2 transport and storage	0.000292212
('ILCD 2.0 2018 midpoint', 'climate change', 'climate change total')	'ATR BM, HT+LT, + CCS (MDEA), 98 (average), cut-off approach' (megajoule, CH, None)	Direct CO2 emissions	0.00142017
('ILCD 2.0 2018 midpoint', 'climate change', 'climate change total')	'ATR BM, HT+LT, + CCS (MDEA), 98 (average), cut-off approach' (megajoule, CH, None)	Electricity from/to grid	0.00510466
('ILCD 2.0 2018 midpoint', 'climate change', 'climate change total')	'ATR BM, HT+LT, + CCS (MDEA), 98 (average), cut-off approach' (megajoule, CH, None)	Emissions from fuel burning in furnace	0
('ILCD 2.0 2018 midpoint', 'climate change', 'climate change total')	'ATR BM, HT+LT, + CCS (MDEA), 98 (average), cut-off approach' (megajoule, CH, None)	Fuel supply chain	0.0885548
('ILCD 2.0 2018 midpoint', 'climate change', 'climate change total')	'ATR BM, HT+LT, + CCS (MDEA), 98 (average), cut-off approach' (megajoule, CH, None)	Plant infrastructure	0.000631281
('ILCD 2.0 2018 midpoint', 'climate change', 'climate change total')	'ATR BM, HT+LT, + CCS (MDEA), 98 (average), cut-off approach' (megajoule, CH, None)	Water supply	2.27994e-05
('ILCD 2.0 2018 midpoint', 'ecosystem quality', 'freshwater and terrestrial acidification')	'ATR BM, HT+LT, + CCS (MDEA), 98 (average), cut-off approach' (megajoule, CH, None)	Catalysts&adsorbents	7.85337e-06
('ILCD 2.0 2018 midpoint', 'ecosystem quality', 'freshwater and terrestrial acidification')	'ATR BM, HT+LT, + CCS (MDEA), 98 (average), cut-off approach' (megajoule, CH, None)	CO2 transport and storage	1.63589e-06
('ILCD 2.0 2018 midpoint', 'ecosystem quality', 'freshwater and terrestrial acidification')	'ATR BM, HT+LT, + CCS (MDEA), 98 (average), cut-off approach' (megajoule, CH, None)	Direct CO2 emissions	0
('ILCD 2.0 2018 midpoint', 'ecosystem quality', 'freshwater and terrestrial acidification')	'ATR BM, HT+LT, + CCS (MDEA), 98 (average), cut-off approach' (megajoule, CH, None)	Electricity from/to grid	2.64087e-05
('ILCD 2.0 2018 midpoint', 'ecosystem quality', 'freshwater and terrestrial acidification')	'ATR BM, HT+LT, + CCS (MDEA), 98 (average), cut-off approach' (megajoule, CH, None)	Emissions from fuel burning in furnace	1.8498e-05
('ILCD 2.0 2018 midpoint', 'ecosystem quality', 'freshwater and terrestrial acidification')	'ATR BM, HT+LT, + CCS (MDEA), 98 (average), cut-off approach' (megajoule, CH, None)	Fuel supply chain	0.000125123
('ILCD 2.0 2018 midpoint', 'ecosystem quality', 'freshwater and terrestrial acidification')	'ATR BM, HT+LT, + CCS (MDEA), 98 (average), cut-off approach' (megajoule, CH, None)	Plant infrastructure	7.89893e-06
('ILCD 2.0 2018 midpoint', 'ecosystem quality', 'freshwater and terrestrial acidification')	'ATR BM, HT+LT, + CCS (MDEA), 98 (average), cut-off approach' (megajoule, CH, None)	Water supply	2.47425e-07
('ILCD 2.0 2018 midpoint', 'ecosystem quality', 'freshwater ecotoxicity')	'ATR BM, HT+LT, + CCS (MDEA), 98 (average), cut-off approach' (megajoule, CH, None)	Catalysts&adsorbents	0.000628182
('ILCD 2.0 2018 midpoint', 'ecosystem quality', 'freshwater ecotoxicity')	'ATR BM, HT+LT, + CCS (MDEA), 98 (average), cut-off approach' (megajoule, CH, None)	CO2 transport and storage	9.89258e-05
('ILCD 2.0 2018 midpoint', 'ecosystem quality', 'freshwater ecotoxicity')	'ATR BM, HT+LT, + CCS (MDEA), 98 (average), cut-off approach' (megajoule, CH, None)	Direct CO2 emissions	0
('ILCD 2.0 2018 midpoint', 'ecosystem quality', 'freshwater ecotoxicity')	'ATR BM, HT+LT, + CCS (MDEA), 98 (average), cut-off approach' (megajoule, CH, None)	Electricity from/to grid	0.00128555
('ILCD 2.0 2018 midpoint', 'ecosystem quality', 'freshwater ecotoxicity')	'ATR BM, HT+LT, + CCS (MDEA), 98 (average), cut-off approach' (megajoule, CH, None)	Emissions from fuel burning in furnace	0
('ILCD 2.0 2018 midpoint', 'ecosystem quality', 'freshwater ecotoxicity')	'ATR BM, HT+LT, + CCS (MDEA), 98 (average), cut-off approach' (megajoule, CH, None)	Fuel supply chain	0.0123156
('ILCD 2.0 2018 midpoint', 'ecosystem quality', 'freshwater ecotoxicity')	'ATR BM, HT+LT, + CCS (MDEA), 98 (average), cut-off approach' (megajoule, CH, None)	Plant infrastructure	0.00217872
('ILCD 2.0 2018 midpoint', 'ecosystem quality', 'freshwater ecotoxicity')	'ATR BM, HT+LT, + CCS (MDEA), 98 (average), cut-off approach' (megajoule, CH, None)	Water supply	3.76331e-05
('ILCD 2.0 2018 midpoint', 'ecosystem quality', 'marine eutrophication')	'ATR BM, HT+LT, + CCS (MDEA), 98 (average), cut-off approach' (megajoule, CH, None)	Catalysts&adsorbents	2.43506e-07
('ILCD 2.0 2018 midpoint', 'ecosystem quality', 'marine eutrophication')	'ATR BM, HT+LT, + CCS (MDEA), 98 (average), cut-off approach' (megajoule, CH, None)	CO2 transport and storage	2.97556e-07
('ILCD 2.0 2018 midpoint', 'ecosystem quality', 'marine eutrophication')	'ATR BM, HT+LT, + CCS (MDEA), 98 (average), cut-off approach' (megajoule, CH, None)	Direct CO2 emissions	0
('ILCD 2.0 2018 midpoint', 'ecosystem quality', 'marine eutrophication')	'ATR BM, HT+LT, + CCS (MDEA), 98 (average), cut-off approach' (megajoule, CH, None)	Electricity from/to grid	4.56373e-06
('ILCD 2.0 2018 midpoint', 'ecosystem quality', 'marine eutrophication')	'ATR BM, HT+LT, + CCS (MDEA), 98 (average), cut-off approach' (megajoule, CH, None)	Emissions from fuel burning in furnace	9.72394e-06
('ILCD 2.0 2018 midpoint', 'ecosystem quality', 'marine eutrophication')	'ATR BM, HT+LT, + CCS (MDEA), 98 (average), cut-off approach' (megajoule, CH, None)	Fuel supply chain	1.03967e-05
('ILCD 2.0 2018 midpoint', 'ecosystem quality', 'marine eutrophication')	'ATR BM, HT+LT, + CCS (MDEA), 98 (average), cut-off approach' (megajoule, CH, None)	Plant infrastructure	8.83643e-07
('ILCD 2.0 2018 midpoint', 'ecosystem quality', 'marine eutrophication')	'ATR BM, HT+LT, + CCS (MDEA), 98 (average), cut-off approach' (megajoule, CH, None)	Water supply	2.4094e-08
('ILCD 2.0 2018 midpoint', 'ecosystem quality', 'terrestrial eutrophication')	'ATR BM, HT+LT, + CCS (MDEA), 98 (average), cut-off approach' (megajoule, CH, None)	Catalysts&adsorbents	3.26269e-06
('ILCD 2.0 2018 midpoint', 'ecosystem quality', 'terrestrial eutrophication')	'ATR BM, HT+LT, + CCS (MDEA), 98 (average), cut-off approach' (megajoule, CH, None)	CO2 transport and storage	2.84787e-06
('ILCD 2.0 2018 midpoint', 'ecosystem quality', 'terrestrial eutrophication')	'ATR BM, HT+LT, + CCS (MDEA), 98 (average), cut-off approach' (megajoule, CH, None)	Direct CO2 emissions	0
('ILCD 2.0 2018 midpoint', 'ecosystem quality', 'terrestrial eutrophication')	'ATR BM, HT+LT, + CCS (MDEA), 98 (average), cut-off approach' (megajoule, CH, None)	Electricity from/to grid	4.23724e-05
('ILCD 2.0 2018 midpoint', 'ecosystem quality', 'terrestrial eutrophication')	'ATR BM, HT+LT, + CCS (MDEA), 98 (average), cut-off approach' (megajoule, CH, None)	Emissions from fuel burning in furnace	0.000106488
('ILCD 2.0 2018 midpoint', 'ecosystem quality', 'terrestrial eutrophication')	'ATR BM, HT+LT, + CCS (MDEA), 98 (average), cut-off approach' (megajoule, CH, None)	Fuel supply chain	0.000184025
('ILCD 2.0 2018 midpoint', 'ecosystem quality', 'terrestrial eutrophication')	'ATR BM, HT+LT, + CCS (MDEA), 98 (average), cut-off approach' (megajoule, CH, None)	Plant infrastructure	1.03808e-05
('ILCD 2.0 2018 midpoint', 'ecosystem quality', 'terrestrial eutrophication')	'ATR BM, HT+LT, + CCS (MDEA), 98 (average), cut-off approach' (megajoule, CH, None)	Water supply	2.44599e-07
('ILCD 2.0 2018 midpoint', 'human health', 'carcinogenic effects')	'ATR BM, HT+LT, + CCS (MDEA), 98 (average), cut-off approach' (megajoule, CH, None)	Catalysts&adsorbents	2.32399e-11
('ILCD 2.0 2018 midpoint', 'human health', 'carcinogenic effects')	'ATR BM, HT+LT, + CCS (MDEA), 98 (average), cut-off approach' (megajoule, CH, None)	CO2 transport and storage	3.76598e-12
('ILCD 2.0 2018 midpoint', 'human health', 'carcinogenic effects')	'ATR BM, HT+LT, + CCS (MDEA), 98 (average), cut-off approach' (megajoule, CH, None)	Direct CO2 emissions	0
('ILCD 2.0 2018 midpoint', 'human health', 'carcinogenic effects')	'ATR BM, HT+LT, + CCS (MDEA), 98 (average), cut-off approach' (megajoule, CH, None)	Electricity from/to grid	3.49959e-11
('ILCD 2.0 2018 midpoint', 'human health', 'carcinogenic effects')	'ATR BM, HT+LT, + CCS (MDEA), 98 (average), cut-off approach' (megajoule, CH, None)	Emissions from fuel burning in furnace	0
('ILCD 2.0 2018 midpoint', 'human health', 'carcinogenic effects')	'ATR BM, HT+LT, + CCS (MDEA), 98 (average), cut-off approach' (megajoule, CH, None)	Fuel supply chain	3.46831e-10
('ILCD 2.0 2018 midpoint', 'human health', 'carcinogenic effects')	'ATR BM, HT+LT, + CCS (MDEA), 98 (average), cut-off approach' (megajoule, CH, None)	Plant infrastructure	7.3049e-11
('ILCD 2.0 2018 midpoint', 'human health', 'carcinogenic effects')	'ATR BM, HT+LT, + CCS (MDEA), 98 (average), cut-off approach' (megajoule, CH, None)	Water supply	9.08748e-13
('ILCD 2.0 2018 midpoint', 'human health', 'ionising radiation')	'ATR BM, HT+LT, + CCS (MDEA), 98 (average), cut-off approach' (megajoule, CH, None)	Catalysts&adsorbents	6.50284e-06
('ILCD 2.0 2018 midpoint', 'human health', 'ionising radiation')	'ATR BM, HT+LT, + CCS (MDEA), 98 (average), cut-off approach' (megajoule, CH, None)	CO2 transport and storage	0.000155422
('ILCD 2.0 2018 midpoint', 'human health', 'ionising radiation')	'ATR BM, HT+LT, + CCS (MDEA), 98 (average), cut-off approach' (megajoule, CH, None)	Direct CO2 emissions	0
('ILCD 2.0 2018 midpoint', 'human health', 'ionising radiation')	'ATR BM, HT+LT, + CCS (MDEA), 98 (average), cut-off approach' (megajoule, CH, None)	Electricity from/to grid	0.00282152
('ILCD 2.0 2018 midpoint', 'human health', 'ionising radiation')	'ATR BM, HT+LT, + CCS (MDEA), 98 (average), cut-off approach' (megajoule, CH, None)	Emissions from fuel burning in furnace	0
('ILCD 2.0 2018 midpoint', 'human health', 'ionising radiation')	'ATR BM, HT+LT, + CCS (MDEA), 98 (average), cut-off approach' (megajoule, CH, None)	Fuel supply chain	0.0020608
('ILCD 2.0 2018 midpoint', 'human health', 'ionising radiation')	'ATR BM, HT+LT, + CCS (MDEA), 98 (average), cut-off approach' (megajoule, CH, None)	Plant infrastructure	0.000106411
('ILCD 2.0 2018 midpoint', 'human health', 'ionising radiation')	'ATR BM, HT+LT, + CCS (MDEA), 98 (average), cut-off approach' (megajoule, CH, None)	Water supply	3.82125e-06
('ILCD 2.0 2018 midpoint', 'human health', 'non-carcinogenic effects')	'ATR BM, HT+LT, + CCS (MDEA), 98 (average), cut-off approach' (megajoule, CH, None)	Catalysts&adsorbents	1.68319e-10
('ILCD 2.0 2018 midpoint', 'human health', 'non-carcinogenic effects')	'ATR BM, HT+LT, + CCS (MDEA), 98 (average), cut-off approach' (megajoule, CH, None)	CO2 transport and storage	3.28241e-11
('ILCD 2.0 2018 midpoint', 'human health', 'non-carcinogenic effects')	'ATR BM, HT+LT, + CCS (MDEA), 98 (average), cut-off approach' (megajoule, CH, None)	Direct CO2 emissions	0
('ILCD 2.0 2018 midpoint', 'human health', 'non-carcinogenic effects')	'ATR BM, HT+LT, + CCS (MDEA), 98 (average), cut-off approach' (megajoule, CH, None)	Electricity from/to grid	5.07156e-10
('ILCD 2.0 2018 midpoint', 'human health', 'non-carcinogenic effects')	'ATR BM, HT+LT, + CCS (MDEA), 98 (average), cut-off approach' (megajoule, CH, None)	Emissions from fuel burning in furnace	0
('ILCD 2.0 2018 midpoint', 'human health', 'non-carcinogenic effects')	'ATR BM, HT+LT, + CCS (MDEA), 98 (average), cut-off approach' (megajoule, CH, None)	Fuel supply chain	3.21531e-09
('ILCD 2.0 2018 midpoint', 'human health', 'non-carcinogenic effects')	'ATR BM, HT+LT, + CCS (MDEA), 98 (average), cut-off approach' (megajoule, CH, None)	Plant infrastructure	5.72603e-10
('ILCD 2.0 2018 midpoint', 'human health', 'non-carcinogenic effects')	'ATR BM, HT+LT, + CCS (MDEA), 98 (average), cut-off approach' (megajoule, CH, None)	Water supply	6.85549e-12
('ILCD 2.0 2018 midpoint', 'human health', 'ozone layer depletion')	'ATR BM, HT+LT, + CCS (MDEA), 98 (average), cut-off approach' (megajoule, CH, None)	Catalysts&adsorbents	1.38511e-11
('ILCD 2.0 2018 midpoint', 'human health', 'ozone layer depletion')	'ATR BM, HT+LT, + CCS (MDEA), 98 (average), cut-off approach' (megajoule, CH, None)	CO2 transport and storage	2.5224e-11
('ILCD 2.0 2018 midpoint', 'human health', 'ozone layer depletion')	'ATR BM, HT+LT, + CCS (MDEA), 98 (average), cut-off approach' (megajoule, CH, None)	Direct CO2 emissions	0
('ILCD 2.0 2018 midpoint', 'human health', 'ozone layer depletion')	'ATR BM, HT+LT, + CCS (MDEA), 98 (average), cut-off approach' (megajoule, CH, None)	Electricity from/to grid	4.37051e-10
('ILCD 2.0 2018 midpoint', 'human health', 'ozone layer depletion')	'ATR BM, HT+LT, + CCS (MDEA), 98 (average), cut-off approach' (megajoule, CH, None)	Emissions from fuel burning in furnace	0
('ILCD 2.0 2018 midpoint', 'human health', 'ozone layer depletion')	'ATR BM, HT+LT, + CCS (MDEA), 98 (average), cut-off approach' (megajoule, CH, None)	Fuel supply chain	9.73579e-10
('ILCD 2.0 2018 midpoint', 'human health', 'ozone layer depletion')	'ATR BM, HT+LT, + CCS (MDEA), 98 (average), cut-off approach' (megajoule, CH, None)	Plant infrastructure	4.70937e-11
('ILCD 2.0 2018 midpoint', 'human health', 'ozone layer depletion')	'ATR BM, HT+LT, + CCS (MDEA), 98 (average), cut-off approach' (megajoule, CH, None)	Water supply	1.53782e-11
('ILCD 2.0 2018 midpoint', 'human health', 'photochemical ozone creation')	'ATR BM, HT+LT, + CCS (MDEA), 98 (average), cut-off approach' (megajoule, CH, None)	Catalysts&adsorbents	1.11653e-06
('ILCD 2.0 2018 midpoint', 'human health', 'photochemical ozone creation')	'ATR BM, HT+LT, + CCS (MDEA), 98 (average), cut-off approach' (megajoule, CH, None)	CO2 transport and storage	7.31427e-07
('ILCD 2.0 2018 midpoint', 'human health', 'photochemical ozone creation')	'ATR BM, HT+LT, + CCS (MDEA), 98 (average), cut-off approach' (megajoule, CH, None)	Direct CO2 emissions	0
('ILCD 2.0 2018 midpoint', 'human health', 'photochemical ozone creation')	'ATR BM, HT+LT, + CCS (MDEA), 98 (average), cut-off approach' (megajoule, CH, None)	Electricity from/to grid	1.05082e-05
('ILCD 2.0 2018 midpoint', 'human health', 'photochemical ozone creation')	'ATR BM, HT+LT, + CCS (MDEA), 98 (average), cut-off approach' (megajoule, CH, None)	Emissions from fuel burning in furnace	2.49973e-05
('ILCD 2.0 2018 midpoint', 'human health', 'photochemical ozone creation')	'ATR BM, HT+LT, + CCS (MDEA), 98 (average), cut-off approach' (megajoule, CH, None)	Fuel supply chain	3.26152e-05
('ILCD 2.0 2018 midpoint', 'human health', 'photochemical ozone creation')	'ATR BM, HT+LT, + CCS (MDEA), 98 (average), cut-off approach' (megajoule, CH, None)	Plant infrastructure	2.9728e-06
('ILCD 2.0 2018 midpoint', 'human health', 'photochemical ozone creation')	'ATR BM, HT+LT, + CCS (MDEA), 98 (average), cut-off approach' (megajoule, CH, None)	Water supply	7.74427e-08
('ILCD 2.0 2018 midpoint', 'human health', 'respiratory effects, inorganics')	'ATR BM, HT+LT, + CCS (MDEA), 98 (average), cut-off approach' (megajoule, CH, None)	Catalysts&adsorbents	1.45044e-11
('ILCD 2.0 2018 midpoint', 'human health', 'respiratory effects, inorganics')	'ATR BM, HT+LT, + CCS (MDEA), 98 (average), cut-off approach' (megajoule, CH, None)	CO2 transport and storage	5.64274e-12
('ILCD 2.0 2018 midpoint', 'human health', 'respiratory effects, inorganics')	'ATR BM, HT+LT, + CCS (MDEA), 98 (average), cut-off approach' (megajoule, CH, None)	Direct CO2 emissions	0
('ILCD 2.0 2018 midpoint', 'human health', 'respiratory effects, inorganics')	'ATR BM, HT+LT, + CCS (MDEA), 98 (average), cut-off approach' (megajoule, CH, None)	Electricity from/to grid	7.72775e-11
('ILCD 2.0 2018 midpoint', 'human health', 'respiratory effects, inorganics')	'ATR BM, HT+LT, + CCS (MDEA), 98 (average), cut-off approach' (megajoule, CH, None)	Emissions from fuel burning in furnace	3.99956e-11
('ILCD 2.0 2018 midpoint', 'human health', 'respiratory effects, inorganics')	'ATR BM, HT+LT, + CCS (MDEA), 98 (average), cut-off approach' (megajoule, CH, None)	Fuel supply chain	8.93976e-10
('ILCD 2.0 2018 midpoint', 'human health', 'respiratory effects, inorganics')	'ATR BM, HT+LT, + CCS (MDEA), 98 (average), cut-off approach' (megajoule, CH, None)	Plant infrastructure	4.70315e-11
('ILCD 2.0 2018 midpoint', 'human health', 'respiratory effects, inorganics')	'ATR BM, HT+LT, + CCS (MDEA), 98 (average), cut-off approach' (megajoule, CH, None)	Water supply	1.74323e-12
('ILCD 2.0 2018 midpoint', 'resources', 'fossils')	'ATR BM, HT+LT, + CCS (MDEA), 98 (average), cut-off approach' (megajoule, CH, None)	Catalysts&adsorbents	0.00122557
('ILCD 2.0 2018 midpoint', 'resources', 'fossils')	'ATR BM, HT+LT, + CCS (MDEA), 98 (average), cut-off approach' (megajoule, CH, None)	CO2 transport and storage	0.00672139
('ILCD 2.0 2018 midpoint', 'resources', 'fossils')	'ATR BM, HT+LT, + CCS (MDEA), 98 (average), cut-off approach' (megajoule, CH, None)	Direct CO2 emissions	0
('ILCD 2.0 2018 midpoint', 'resources', 'fossils')	'ATR BM, HT+LT, + CCS (MDEA), 98 (average), cut-off approach' (megajoule, CH, None)	Electricity from/to grid	0.118845
('ILCD 2.0 2018 midpoint', 'resources', 'fossils')	'ATR BM, HT+LT, + CCS (MDEA), 98 (average), cut-off approach' (megajoule, CH, None)	Emissions from fuel burning in furnace	0
('ILCD 2.0 2018 midpoint', 'resources', 'fossils')	'ATR BM, HT+LT, + CCS (MDEA), 98 (average), cut-off approach' (megajoule, CH, None)	Fuel supply chain	0.158378
('ILCD 2.0 2018 midpoint', 'resources', 'fossils')	'ATR BM, HT+LT, + CCS (MDEA), 98 (average), cut-off approach' (megajoule, CH, None)	Plant infrastructure	0.00956905
('ILCD 2.0 2018 midpoint', 'resources', 'fossils')	'ATR BM, HT+LT, + CCS (MDEA), 98 (average), cut-off approach' (megajoule, CH, None)	Water supply	0.000352256
('ILCD 2.0 2018 midpoint', 'resources', 'land use')	'ATR BM, HT+LT, + CCS (MDEA), 98 (average), cut-off approach' (megajoule, CH, None)	Catalysts&adsorbents	0.00112991
('ILCD 2.0 2018 midpoint', 'resources', 'land use')	'ATR BM, HT+LT, + CCS (MDEA), 98 (average), cut-off approach' (megajoule, CH, None)	CO2 transport and storage	0.00275431
('ILCD 2.0 2018 midpoint', 'resources', 'land use')	'ATR BM, HT+LT, + CCS (MDEA), 98 (average), cut-off approach' (megajoule, CH, None)	Direct CO2 emissions	0
('ILCD 2.0 2018 midpoint', 'resources', 'land use')	'ATR BM, HT+LT, + CCS (MDEA), 98 (average), cut-off approach' (megajoule, CH, None)	Electricity from/to grid	0.0522298
('ILCD 2.0 2018 midpoint', 'resources', 'land use')	'ATR BM, HT+LT, + CCS (MDEA), 98 (average), cut-off approach' (megajoule, CH, None)	Emissions from fuel burning in furnace	0
('ILCD 2.0 2018 midpoint', 'resources', 'land use')	'ATR BM, HT+LT, + CCS (MDEA), 98 (average), cut-off approach' (megajoule, CH, None)	Fuel supply chain	0.140835
('ILCD 2.0 2018 midpoint', 'resources', 'land use')	'ATR BM, HT+LT, + CCS (MDEA), 98 (average), cut-off approach' (megajoule, CH, None)	Plant infrastructure	0.0215589
('ILCD 2.0 2018 midpoint', 'resources', 'land use')	'ATR BM, HT+LT, + CCS (MDEA), 98 (average), cut-off approach' (megajoule, CH, None)	Water supply	0.000178246
('ILCD 2.0 2018 midpoint', 'resources', 'minerals and metals')	'ATR BM, HT+LT, + CCS (MDEA), 98 (average), cut-off approach' (megajoule, CH, None)	Catalysts&adsorbents	1.55187e-08
('ILCD 2.0 2018 midpoint', 'resources', 'minerals and metals')	'ATR BM, HT+LT, + CCS (MDEA), 98 (average), cut-off approach' (megajoule, CH, None)	CO2 transport and storage	9.04898e-10
('ILCD 2.0 2018 midpoint', 'resources', 'minerals and metals')	'ATR BM, HT+LT, + CCS (MDEA), 98 (average), cut-off approach' (megajoule, CH, None)	Direct CO2 emissions	0
('ILCD 2.0 2018 midpoint', 'resources', 'minerals and metals')	'ATR BM, HT+LT, + CCS (MDEA), 98 (average), cut-off approach' (megajoule, CH, None)	Electricity from/to grid	1.18606e-08
('ILCD 2.0 2018 midpoint', 'resources', 'minerals and metals')	'ATR BM, HT+LT, + CCS (MDEA), 98 (average), cut-off approach' (megajoule, CH, None)	Emissions from fuel burning in furnace	0
('ILCD 2.0 2018 midpoint', 'resources', 'minerals and metals')	'ATR BM, HT+LT, + CCS (MDEA), 98 (average), cut-off approach' (megajoule, CH, None)	Fuel supply chain	1.24709e-06
('ILCD 2.0 2018 midpoint', 'resources', 'minerals and metals')	'ATR BM, HT+LT, + CCS (MDEA), 98 (average), cut-off approach' (megajoule, CH, None)	Plant infrastructure	1.81183e-07
('ILCD 2.0 2018 midpoint', 'resources', 'minerals and metals')	'ATR BM, HT+LT, + CCS (MDEA), 98 (average), cut-off approach' (megajoule, CH, None)	Water supply	6.7666e-10
('ReCiPe Midpoint (H) V1.13', 'metal depletion', 'MDP')	'ATR BM, HT+LT, + CCS (MDEA), 98 (average), cut-off approach' (megajoule, CH, None)	Catalysts&adsorbents	0.00028327
('ReCiPe Midpoint (H) V1.13', 'metal depletion', 'MDP')	'ATR BM, HT+LT, + CCS (MDEA), 98 (average), cut-off approach' (megajoule, CH, None)	CO2 transport and storage	3.98431e-06
('ReCiPe Midpoint (H) V1.13', 'metal depletion', 'MDP')	'ATR BM, HT+LT, + CCS (MDEA), 98 (average), cut-off approach' (megajoule, CH, None)	Direct CO2 emissions	0
('ReCiPe Midpoint (H) V1.13', 'metal depletion', 'MDP')	'ATR BM, HT+LT, + CCS (MDEA), 98 (average), cut-off approach' (megajoule, CH, None)	Electricity from/to grid	4.25982e-05
('ReCiPe Midpoint (H) V1.13', 'metal depletion', 'MDP')	'ATR BM, HT+LT, + CCS (MDEA), 98 (average), cut-off approach' (megajoule, CH, None)	Emissions from fuel burning in furnace	0
('ReCiPe Midpoint (H) V1.13', 'metal depletion', 'MDP')	'ATR BM, HT+LT, + CCS (MDEA), 98 (average), cut-off approach' (megajoule, CH, None)	Fuel supply chain	0.00318507
('ReCiPe Midpoint (H) V1.13', 'metal depletion', 'MDP')	'ATR BM, HT+LT, + CCS (MDEA), 98 (average), cut-off approach' (megajoule, CH, None)	Plant infrastructure	0.000575176
('ReCiPe Midpoint (H) V1.13', 'metal depletion', 'MDP')	'ATR BM, HT+LT, + CCS (MDEA), 98 (average), cut-off approach' (megajoule, CH, None)	Water supply	2.07629e-06
('cumulative energy demand', 'fossil', 'non-renewable energy resources, fossil')	'ATR BM, HT+LT, + CCS (MDEA), 98 (average), digestate incineration' (megajoule, CH, None)	Catalysts&adsorbents	0.00104087
('cumulative energy demand', 'fossil', 'non-renewable energy resources, fossil')	'ATR BM, HT+LT, + CCS (MDEA), 98 (average), digestate incineration' (megajoule, CH, None)	CO2 transport and storage	0.00347798
('cumulative energy demand', 'fossil', 'non-renewable energy resources, fossil')	'ATR BM, HT+LT, + CCS (MDEA), 98 (average), digestate incineration' (megajoule, CH, None)	Direct CO2 emissions	0
('cumulative energy demand', 'fossil', 'non-renewable energy resources, fossil')	'ATR BM, HT+LT, + CCS (MDEA), 98 (average), digestate incineration' (megajoule, CH, None)	Electricity from/to grid	0.0446003
('cumulative energy demand', 'fossil', 'non-renewable energy resources, fossil')	'ATR BM, HT+LT, + CCS (MDEA), 98 (average), digestate incineration' (megajoule, CH, None)	Emissions from fuel burning in furnace	0
('cumulative energy demand', 'fossil', 'non-renewable energy resources, fossil')	'ATR BM, HT+LT, + CCS (MDEA), 98 (average), digestate incineration' (megajoule, CH, None)	Fuel supply chain	0.116946
('cumulative energy demand', 'fossil', 'non-renewable energy resources, fossil')	'ATR BM, HT+LT, + CCS (MDEA), 98 (average), digestate incineration' (megajoule, CH, None)	Plant infrastructure	0.00693806
('cumulative energy demand', 'fossil', 'non-renewable energy resources, fossil')	'ATR BM, HT+LT, + CCS (MDEA), 98 (average), digestate incineration' (megajoule, CH, None)	Water supply	0.000277399
('cumulative energy demand', 'nuclear', 'non-renewable energy resources, nuclear')	'ATR BM, HT+LT, + CCS (MDEA), 98 (average), digestate incineration' (megajoule, CH, None)	Catalysts&adsorbents	8.69457e-05
('cumulative energy demand', 'nuclear', 'non-renewable energy resources, nuclear')	'ATR BM, HT+LT, + CCS (MDEA), 98 (average), digestate incineration' (megajoule, CH, None)	CO2 transport and storage	0.00263141
('cumulative energy demand', 'nuclear', 'non-renewable energy resources, nuclear')	'ATR BM, HT+LT, + CCS (MDEA), 98 (average), digestate incineration' (megajoule, CH, None)	Direct CO2 emissions	0
('cumulative energy demand', 'nuclear', 'non-renewable energy resources, nuclear')	'ATR BM, HT+LT, + CCS (MDEA), 98 (average), digestate incineration' (megajoule, CH, None)	Electricity from/to grid	0.0351935
('cumulative energy demand', 'nuclear', 'non-renewable energy resources, nuclear')	'ATR BM, HT+LT, + CCS (MDEA), 98 (average), digestate incineration' (megajoule, CH, None)	Emissions from fuel burning in furnace	0
('cumulative energy demand', 'nuclear', 'non-renewable energy resources, nuclear')	'ATR BM, HT+LT, + CCS (MDEA), 98 (average), digestate incineration' (megajoule, CH, None)	Fuel supply chain	0.0311952
('cumulative energy demand', 'nuclear', 'non-renewable energy resources, nuclear')	'ATR BM, HT+LT, + CCS (MDEA), 98 (average), digestate incineration' (megajoule, CH, None)	Plant infrastructure	0.00171998
('cumulative energy demand', 'nuclear', 'non-renewable energy resources, nuclear')	'ATR BM, HT+LT, + CCS (MDEA), 98 (average), digestate incineration' (megajoule, CH, None)	Water supply	5.86471e-05
('cumulative energy demand', 'primary forest', 'non-renewable energy resources, primary forest')	'ATR BM, HT+LT, + CCS (MDEA), 98 (average), digestate incineration' (megajoule, CH, None)	Catalysts&adsorbents	2.14448e-08
('cumulative energy demand', 'primary forest', 'non-renewable energy resources, primary forest')	'ATR BM, HT+LT, + CCS (MDEA), 98 (average), digestate incineration' (megajoule, CH, None)	CO2 transport and storage	5.12046e-08
('cumulative energy demand', 'primary forest', 'non-renewable energy resources, primary forest')	'ATR BM, HT+LT, + CCS (MDEA), 98 (average), digestate incineration' (megajoule, CH, None)	Direct CO2 emissions	0
('cumulative energy demand', 'primary forest', 'non-renewable energy resources, primary forest')	'ATR BM, HT+LT, + CCS (MDEA), 98 (average), digestate incineration' (megajoule, CH, None)	Electricity from/to grid	3.10393e-07
('cumulative energy demand', 'primary forest', 'non-renewable energy resources, primary forest')	'ATR BM, HT+LT, + CCS (MDEA), 98 (average), digestate incineration' (megajoule, CH, None)	Emissions from fuel burning in furnace	0
('cumulative energy demand', 'primary forest', 'non-renewable energy resources, primary forest')	'ATR BM, HT+LT, + CCS (MDEA), 98 (average), digestate incineration' (megajoule, CH, None)	Fuel supply chain	2.08208e-06
('cumulative energy demand', 'primary forest', 'non-renewable energy resources, primary forest')	'ATR BM, HT+LT, + CCS (MDEA), 98 (average), digestate incineration' (megajoule, CH, None)	Plant infrastructure	3.70972e-07
('cumulative energy demand', 'primary forest', 'non-renewable energy resources, primary forest')	'ATR BM, HT+LT, + CCS (MDEA), 98 (average), digestate incineration' (megajoule, CH, None)	Water supply	4.68063e-09
('ILCD 2.0 2018 midpoint', 'climate change', 'climate change total')	'ATR BM, HT+LT, + CCS (MDEA), 98 (average), digestate incineration' (megajoule, CH, None)	Catalysts&adsorbents	9.12173e-05
('ILCD 2.0 2018 midpoint', 'climate change', 'climate change total')	'ATR BM, HT+LT, + CCS (MDEA), 98 (average), digestate incineration' (megajoule, CH, None)	CO2 transport and storage	0.000286444
('ILCD 2.0 2018 midpoint', 'climate change', 'climate change total')	'ATR BM, HT+LT, + CCS (MDEA), 98 (average), digestate incineration' (megajoule, CH, None)	Direct CO2 emissions	0.0047197
('ILCD 2.0 2018 midpoint', 'climate change', 'climate change total')	'ATR BM, HT+LT, + CCS (MDEA), 98 (average), digestate incineration' (megajoule, CH, None)	Electricity from/to grid	0.00369263
('ILCD 2.0 2018 midpoint', 'climate change', 'climate change total')	'ATR BM, HT+LT, + CCS (MDEA), 98 (average), digestate incineration' (megajoule, CH, None)	Emissions from fuel burning in furnace	0
('ILCD 2.0 2018 midpoint', 'climate change', 'climate change total')	'ATR BM, HT+LT, + CCS (MDEA), 98 (average), digestate incineration' (megajoule, CH, None)	Fuel supply chain	-0.0645362
('ILCD 2.0 2018 midpoint', 'climate change', 'climate change total')	'ATR BM, HT+LT, + CCS (MDEA), 98 (average), digestate incineration' (megajoule, CH, None)	Plant infrastructure	0.000631279
('ILCD 2.0 2018 midpoint', 'climate change', 'climate change total')	'ATR BM, HT+LT, + CCS (MDEA), 98 (average), digestate incineration' (megajoule, CH, None)	Water supply	2.27993e-05
('ILCD 2.0 2018 midpoint', 'ecosystem quality', 'freshwater and terrestrial acidification')	'ATR BM, HT+LT, + CCS (MDEA), 98 (average), digestate incineration' (megajoule, CH, None)	Catalysts&adsorbents	7.85337e-06
('ILCD 2.0 2018 midpoint', 'ecosystem quality', 'freshwater and terrestrial acidification')	'ATR BM, HT+LT, + CCS (MDEA), 98 (average), digestate incineration' (megajoule, CH, None)	CO2 transport and storage	1.60359e-06
('ILCD 2.0 2018 midpoint', 'ecosystem quality', 'freshwater and terrestrial acidification')	'ATR BM, HT+LT, + CCS (MDEA), 98 (average), digestate incineration' (megajoule, CH, None)	Direct CO2 emissions	0
('ILCD 2.0 2018 midpoint', 'ecosystem quality', 'freshwater and terrestrial acidification')	'ATR BM, HT+LT, + CCS (MDEA), 98 (average), digestate incineration' (megajoule, CH, None)	Electricity from/to grid	1.91036e-05
('ILCD 2.0 2018 midpoint', 'ecosystem quality', 'freshwater and terrestrial acidification')	'ATR BM, HT+LT, + CCS (MDEA), 98 (average), digestate incineration' (megajoule, CH, None)	Emissions from fuel burning in furnace	1.8498e-05
('ILCD 2.0 2018 midpoint', 'ecosystem quality', 'freshwater and terrestrial acidification')	'ATR BM, HT+LT, + CCS (MDEA), 98 (average), digestate incineration' (megajoule, CH, None)	Fuel supply chain	0.000125075
('ILCD 2.0 2018 midpoint', 'ecosystem quality', 'freshwater and terrestrial acidification')	'ATR BM, HT+LT, + CCS (MDEA), 98 (average), digestate incineration' (megajoule, CH, None)	Plant infrastructure	7.89891e-06
('ILCD 2.0 2018 midpoint', 'ecosystem quality', 'freshwater and terrestrial acidification')	'ATR BM, HT+LT, + CCS (MDEA), 98 (average), digestate incineration' (megajoule, CH, None)	Water supply	2.47425e-07
('ILCD 2.0 2018 midpoint', 'ecosystem quality', 'freshwater ecotoxicity')	'ATR BM, HT+LT, + CCS (MDEA), 98 (average), digestate incineration' (megajoule, CH, None)	Catalysts&adsorbents	0.000628182
('ILCD 2.0 2018 midpoint', 'ecosystem quality', 'freshwater ecotoxicity')	'ATR BM, HT+LT, + CCS (MDEA), 98 (average), digestate incineration' (megajoule, CH, None)	CO2 transport and storage	9.69729e-05
('ILCD 2.0 2018 midpoint', 'ecosystem quality', 'freshwater ecotoxicity')	'ATR BM, HT+LT, + CCS (MDEA), 98 (average), digestate incineration' (megajoule, CH, None)	Direct CO2 emissions	0
('ILCD 2.0 2018 midpoint', 'ecosystem quality', 'freshwater ecotoxicity')	'ATR BM, HT+LT, + CCS (MDEA), 98 (average), digestate incineration' (megajoule, CH, None)	Electricity from/to grid	0.000929946
('ILCD 2.0 2018 midpoint', 'ecosystem quality', 'freshwater ecotoxicity')	'ATR BM, HT+LT, + CCS (MDEA), 98 (average), digestate incineration' (megajoule, CH, None)	Emissions from fuel burning in furnace	0
('ILCD 2.0 2018 midpoint', 'ecosystem quality', 'freshwater ecotoxicity')	'ATR BM, HT+LT, + CCS (MDEA), 98 (average), digestate incineration' (megajoule, CH, None)	Fuel supply chain	0.0123108
('ILCD 2.0 2018 midpoint', 'ecosystem quality', 'freshwater ecotoxicity')	'ATR BM, HT+LT, + CCS (MDEA), 98 (average), digestate incineration' (megajoule, CH, None)	Plant infrastructure	0.00217871
('ILCD 2.0 2018 midpoint', 'ecosystem quality', 'freshwater ecotoxicity')	'ATR BM, HT+LT, + CCS (MDEA), 98 (average), digestate incineration' (megajoule, CH, None)	Water supply	3.76329e-05
('ILCD 2.0 2018 midpoint', 'ecosystem quality', 'marine eutrophication')	'ATR BM, HT+LT, + CCS (MDEA), 98 (average), digestate incineration' (megajoule, CH, None)	Catalysts&adsorbents	2.43506e-07
('ILCD 2.0 2018 midpoint', 'ecosystem quality', 'marine eutrophication')	'ATR BM, HT+LT, + CCS (MDEA), 98 (average), digestate incineration' (megajoule, CH, None)	CO2 transport and storage	2.91682e-07
('ILCD 2.0 2018 midpoint', 'ecosystem quality', 'marine eutrophication')	'ATR BM, HT+LT, + CCS (MDEA), 98 (average), digestate incineration' (megajoule, CH, None)	Direct CO2 emissions	0
('ILCD 2.0 2018 midpoint', 'ecosystem quality', 'marine eutrophication')	'ATR BM, HT+LT, + CCS (MDEA), 98 (average), digestate incineration' (megajoule, CH, None)	Electricity from/to grid	3.30132e-06
('ILCD 2.0 2018 midpoint', 'ecosystem quality', 'marine eutrophication')	'ATR BM, HT+LT, + CCS (MDEA), 98 (average), digestate incineration' (megajoule, CH, None)	Emissions from fuel burning in furnace	9.72394e-06
('ILCD 2.0 2018 midpoint', 'ecosystem quality', 'marine eutrophication')	'ATR BM, HT+LT, + CCS (MDEA), 98 (average), digestate incineration' (megajoule, CH, None)	Fuel supply chain	1.03927e-05
('ILCD 2.0 2018 midpoint', 'ecosystem quality', 'marine eutrophication')	'ATR BM, HT+LT, + CCS (MDEA), 98 (average), digestate incineration' (megajoule, CH, None)	Plant infrastructure	8.8364e-07
('ILCD 2.0 2018 midpoint', 'ecosystem quality', 'marine eutrophication')	'ATR BM, HT+LT, + CCS (MDEA), 98 (average), digestate incineration' (megajoule, CH, None)	Water supply	2.40939e-08
('ILCD 2.0 2018 midpoint', 'ecosystem quality', 'terrestrial eutrophication')	'ATR BM, HT+LT, + CCS (MDEA), 98 (average), digestate incineration' (megajoule, CH, None)	Catalysts&adsorbents	3.26269e-06
('ILCD 2.0 2018 midpoint', 'ecosystem quality', 'terrestrial eutrophication')	'ATR BM, HT+LT, + CCS (MDEA), 98 (average), digestate incineration' (megajoule, CH, None)	CO2 transport and storage	2.79166e-06
('ILCD 2.0 2018 midpoint', 'ecosystem quality', 'terrestrial eutrophication')	'ATR BM, HT+LT, + CCS (MDEA), 98 (average), digestate incineration' (megajoule, CH, None)	Direct CO2 emissions	0
('ILCD 2.0 2018 midpoint', 'ecosystem quality', 'terrestrial eutrophication')	'ATR BM, HT+LT, + CCS (MDEA), 98 (average), digestate incineration' (megajoule, CH, None)	Electricity from/to grid	3.06515e-05
('ILCD 2.0 2018 midpoint', 'ecosystem quality', 'terrestrial eutrophication')	'ATR BM, HT+LT, + CCS (MDEA), 98 (average), digestate incineration' (megajoule, CH, None)	Emissions from fuel burning in furnace	0.000106488
('ILCD 2.0 2018 midpoint', 'ecosystem quality', 'terrestrial eutrophication')	'ATR BM, HT+LT, + CCS (MDEA), 98 (average), digestate incineration' (megajoule, CH, None)	Fuel supply chain	0.000183954
('ILCD 2.0 2018 midpoint', 'ecosystem quality', 'terrestrial eutrophication')	'ATR BM, HT+LT, + CCS (MDEA), 98 (average), digestate incineration' (megajoule, CH, None)	Plant infrastructure	1.03808e-05
('ILCD 2.0 2018 midpoint', 'ecosystem quality', 'terrestrial eutrophication')	'ATR BM, HT+LT, + CCS (MDEA), 98 (average), digestate incineration' (megajoule, CH, None)	Water supply	2.44598e-07
('ILCD 2.0 2018 midpoint', 'human health', 'carcinogenic effects')	'ATR BM, HT+LT, + CCS (MDEA), 98 (average), digestate incineration' (megajoule, CH, None)	Catalysts&adsorbents	2.32399e-11
('ILCD 2.0 2018 midpoint', 'human health', 'carcinogenic effects')	'ATR BM, HT+LT, + CCS (MDEA), 98 (average), digestate incineration' (megajoule, CH, None)	CO2 transport and storage	3.69164e-12
('ILCD 2.0 2018 midpoint', 'human health', 'carcinogenic effects')	'ATR BM, HT+LT, + CCS (MDEA), 98 (average), digestate incineration' (megajoule, CH, None)	Direct CO2 emissions	0
('ILCD 2.0 2018 midpoint', 'human health', 'carcinogenic effects')	'ATR BM, HT+LT, + CCS (MDEA), 98 (average), digestate incineration' (megajoule, CH, None)	Electricity from/to grid	2.53154e-11
('ILCD 2.0 2018 midpoint', 'human health', 'carcinogenic effects')	'ATR BM, HT+LT, + CCS (MDEA), 98 (average), digestate incineration' (megajoule, CH, None)	Emissions from fuel burning in furnace	0
('ILCD 2.0 2018 midpoint', 'human health', 'carcinogenic effects')	'ATR BM, HT+LT, + CCS (MDEA), 98 (average), digestate incineration' (megajoule, CH, None)	Fuel supply chain	3.46697e-10
('ILCD 2.0 2018 midpoint', 'human health', 'carcinogenic effects')	'ATR BM, HT+LT, + CCS (MDEA), 98 (average), digestate incineration' (megajoule, CH, None)	Plant infrastructure	7.30488e-11
('ILCD 2.0 2018 midpoint', 'human health', 'carcinogenic effects')	'ATR BM, HT+LT, + CCS (MDEA), 98 (average), digestate incineration' (megajoule, CH, None)	Water supply	9.08745e-13
('ILCD 2.0 2018 midpoint', 'human health', 'ionising radiation')	'ATR BM, HT+LT, + CCS (MDEA), 98 (average), digestate incineration' (megajoule, CH, None)	Catalysts&adsorbents	6.50284e-06
('ILCD 2.0 2018 midpoint', 'human health', 'ionising radiation')	'ATR BM, HT+LT, + CCS (MDEA), 98 (average), digestate incineration' (megajoule, CH, None)	CO2 transport and storage	0.000152354
('ILCD 2.0 2018 midpoint', 'human health', 'ionising radiation')	'ATR BM, HT+LT, + CCS (MDEA), 98 (average), digestate incineration' (megajoule, CH, None)	Direct CO2 emissions	0
('ILCD 2.0 2018 midpoint', 'human health', 'ionising radiation')	'ATR BM, HT+LT, + CCS (MDEA), 98 (average), digestate incineration' (megajoule, CH, None)	Electricity from/to grid	0.00204104
('ILCD 2.0 2018 midpoint', 'human health', 'ionising radiation')	'ATR BM, HT+LT, + CCS (MDEA), 98 (average), digestate incineration' (megajoule, CH, None)	Emissions from fuel burning in furnace	0
('ILCD 2.0 2018 midpoint', 'human health', 'ionising radiation')	'ATR BM, HT+LT, + CCS (MDEA), 98 (average), digestate incineration' (megajoule, CH, None)	Fuel supply chain	0.00206
('ILCD 2.0 2018 midpoint', 'human health', 'ionising radiation')	'ATR BM, HT+LT, + CCS (MDEA), 98 (average), digestate incineration' (megajoule, CH, None)	Plant infrastructure	0.000106411
('ILCD 2.0 2018 midpoint', 'human health', 'ionising radiation')	'ATR BM, HT+LT, + CCS (MDEA), 98 (average), digestate incineration' (megajoule, CH, None)	Water supply	3.82124e-06
('ILCD 2.0 2018 midpoint', 'human health', 'non-carcinogenic effects')	'ATR BM, HT+LT, + CCS (MDEA), 98 (average), digestate incineration' (megajoule, CH, None)	Catalysts&adsorbents	1.68319e-10
('ILCD 2.0 2018 midpoint', 'human health', 'non-carcinogenic effects')	'ATR BM, HT+LT, + CCS (MDEA), 98 (average), digestate incineration' (megajoule, CH, None)	CO2 transport and storage	3.21761e-11
('ILCD 2.0 2018 midpoint', 'human health', 'non-carcinogenic effects')	'ATR BM, HT+LT, + CCS (MDEA), 98 (average), digestate incineration' (megajoule, CH, None)	Direct CO2 emissions	0
('ILCD 2.0 2018 midpoint', 'human health', 'non-carcinogenic effects')	'ATR BM, HT+LT, + CCS (MDEA), 98 (average), digestate incineration' (megajoule, CH, None)	Electricity from/to grid	3.66868e-10
('ILCD 2.0 2018 midpoint', 'human health', 'non-carcinogenic effects')	'ATR BM, HT+LT, + CCS (MDEA), 98 (average), digestate incineration' (megajoule, CH, None)	Emissions from fuel burning in furnace	0
('ILCD 2.0 2018 midpoint', 'human health', 'non-carcinogenic effects')	'ATR BM, HT+LT, + CCS (MDEA), 98 (average), digestate incineration' (megajoule, CH, None)	Fuel supply chain	3.21407e-09
('ILCD 2.0 2018 midpoint', 'human health', 'non-carcinogenic effects')	'ATR BM, HT+LT, + CCS (MDEA), 98 (average), digestate incineration' (megajoule, CH, None)	Plant infrastructure	5.72601e-10
('ILCD 2.0 2018 midpoint', 'human health', 'non-carcinogenic effects')	'ATR BM, HT+LT, + CCS (MDEA), 98 (average), digestate incineration' (megajoule, CH, None)	Water supply	6.85547e-12
('ILCD 2.0 2018 midpoint', 'human health', 'ozone layer depletion')	'ATR BM, HT+LT, + CCS (MDEA), 98 (average), digestate incineration' (megajoule, CH, None)	Catalysts&adsorbents	1.38511e-11
('ILCD 2.0 2018 midpoint', 'human health', 'ozone layer depletion')	'ATR BM, HT+LT, + CCS (MDEA), 98 (average), digestate incineration' (megajoule, CH, None)	CO2 transport and storage	2.47261e-11
('ILCD 2.0 2018 midpoint', 'human health', 'ozone layer depletion')	'ATR BM, HT+LT, + CCS (MDEA), 98 (average), digestate incineration' (megajoule, CH, None)	Direct CO2 emissions	0
('ILCD 2.0 2018 midpoint', 'human health', 'ozone layer depletion')	'ATR BM, HT+LT, + CCS (MDEA), 98 (average), digestate incineration' (megajoule, CH, None)	Electricity from/to grid	3.16155e-10
('ILCD 2.0 2018 midpoint', 'human health', 'ozone layer depletion')	'ATR BM, HT+LT, + CCS (MDEA), 98 (average), digestate incineration' (megajoule, CH, None)	Emissions from fuel burning in furnace	0
('ILCD 2.0 2018 midpoint', 'human health', 'ozone layer depletion')	'ATR BM, HT+LT, + CCS (MDEA), 98 (average), digestate incineration' (megajoule, CH, None)	Fuel supply chain	9.73203e-10
('ILCD 2.0 2018 midpoint', 'human health', 'ozone layer depletion')	'ATR BM, HT+LT, + CCS (MDEA), 98 (average), digestate incineration' (megajoule, CH, None)	Plant infrastructure	4.70935e-11
('ILCD 2.0 2018 midpoint', 'human health', 'ozone layer depletion')	'ATR BM, HT+LT, + CCS (MDEA), 98 (average), digestate incineration' (megajoule, CH, None)	Water supply	1.53782e-11
('ILCD 2.0 2018 midpoint', 'human health', 'photochemical ozone creation')	'ATR BM, HT+LT, + CCS (MDEA), 98 (average), digestate incineration' (megajoule, CH, None)	Catalysts&adsorbents	1.11653e-06
('ILCD 2.0 2018 midpoint', 'human health', 'photochemical ozone creation')	'ATR BM, HT+LT, + CCS (MDEA), 98 (average), digestate incineration' (megajoule, CH, None)	CO2 transport and storage	7.16988e-07
('ILCD 2.0 2018 midpoint', 'human health', 'photochemical ozone creation')	'ATR BM, HT+LT, + CCS (MDEA), 98 (average), digestate incineration' (megajoule, CH, None)	Direct CO2 emissions	0
('ILCD 2.0 2018 midpoint', 'human health', 'photochemical ozone creation')	'ATR BM, HT+LT, + CCS (MDEA), 98 (average), digestate incineration' (megajoule, CH, None)	Electricity from/to grid	7.60143e-06
('ILCD 2.0 2018 midpoint', 'human health', 'photochemical ozone creation')	'ATR BM, HT+LT, + CCS (MDEA), 98 (average), digestate incineration' (megajoule, CH, None)	Emissions from fuel burning in furnace	2.49973e-05
('ILCD 2.0 2018 midpoint', 'human health', 'photochemical ozone creation')	'ATR BM, HT+LT, + CCS (MDEA), 98 (average), digestate incineration' (megajoule, CH, None)	Fuel supply chain	3.26026e-05
('ILCD 2.0 2018 midpoint', 'human health', 'photochemical ozone creation')	'ATR BM, HT+LT, + CCS (MDEA), 98 (average), digestate incineration' (megajoule, CH, None)	Plant infrastructure	2.97279e-06
('ILCD 2.0 2018 midpoint', 'human health', 'photochemical ozone creation')	'ATR BM, HT+LT, + CCS (MDEA), 98 (average), digestate incineration' (megajoule, CH, None)	Water supply	7.74425e-08
('ILCD 2.0 2018 midpoint', 'human health', 'respiratory effects, inorganics')	'ATR BM, HT+LT, + CCS (MDEA), 98 (average), digestate incineration' (megajoule, CH, None)	Catalysts&adsorbents	1.45044e-11
('ILCD 2.0 2018 midpoint', 'human health', 'respiratory effects, inorganics')	'ATR BM, HT+LT, + CCS (MDEA), 98 (average), digestate incineration' (megajoule, CH, None)	CO2 transport and storage	5.53135e-12
('ILCD 2.0 2018 midpoint', 'human health', 'respiratory effects, inorganics')	'ATR BM, HT+LT, + CCS (MDEA), 98 (average), digestate incineration' (megajoule, CH, None)	Direct CO2 emissions	0
('ILCD 2.0 2018 midpoint', 'human health', 'respiratory effects, inorganics')	'ATR BM, HT+LT, + CCS (MDEA), 98 (average), digestate incineration' (megajoule, CH, None)	Electricity from/to grid	5.59012e-11
('ILCD 2.0 2018 midpoint', 'human health', 'respiratory effects, inorganics')	'ATR BM, HT+LT, + CCS (MDEA), 98 (average), digestate incineration' (megajoule, CH, None)	Emissions from fuel burning in furnace	3.99956e-11
('ILCD 2.0 2018 midpoint', 'human health', 'respiratory effects, inorganics')	'ATR BM, HT+LT, + CCS (MDEA), 98 (average), digestate incineration' (megajoule, CH, None)	Fuel supply chain	8.9363e-10
('ILCD 2.0 2018 midpoint', 'human health', 'respiratory effects, inorganics')	'ATR BM, HT+LT, + CCS (MDEA), 98 (average), digestate incineration' (megajoule, CH, None)	Plant infrastructure	4.70314e-11
('ILCD 2.0 2018 midpoint', 'human health', 'respiratory effects, inorganics')	'ATR BM, HT+LT, + CCS (MDEA), 98 (average), digestate incineration' (megajoule, CH, None)	Water supply	1.74323e-12
('ILCD 2.0 2018 midpoint', 'resources', 'fossils')	'ATR BM, HT+LT, + CCS (MDEA), 98 (average), digestate incineration' (megajoule, CH, None)	Catalysts&adsorbents	0.00122557
('ILCD 2.0 2018 midpoint', 'resources', 'fossils')	'ATR BM, HT+LT, + CCS (MDEA), 98 (average), digestate incineration' (megajoule, CH, None)	CO2 transport and storage	0.0065887
('ILCD 2.0 2018 midpoint', 'resources', 'fossils')	'ATR BM, HT+LT, + CCS (MDEA), 98 (average), digestate incineration' (megajoule, CH, None)	Direct CO2 emissions	0
('ILCD 2.0 2018 midpoint', 'resources', 'fossils')	'ATR BM, HT+LT, + CCS (MDEA), 98 (average), digestate incineration' (megajoule, CH, None)	Electricity from/to grid	0.0859705
('ILCD 2.0 2018 midpoint', 'resources', 'fossils')	'ATR BM, HT+LT, + CCS (MDEA), 98 (average), digestate incineration' (megajoule, CH, None)	Emissions from fuel burning in furnace	0
('ILCD 2.0 2018 midpoint', 'resources', 'fossils')	'ATR BM, HT+LT, + CCS (MDEA), 98 (average), digestate incineration' (megajoule, CH, None)	Fuel supply chain	0.158317
('ILCD 2.0 2018 midpoint', 'resources', 'fossils')	'ATR BM, HT+LT, + CCS (MDEA), 98 (average), digestate incineration' (megajoule, CH, None)	Plant infrastructure	0.00956902
('ILCD 2.0 2018 midpoint', 'resources', 'fossils')	'ATR BM, HT+LT, + CCS (MDEA), 98 (average), digestate incineration' (megajoule, CH, None)	Water supply	0.000352254
('ILCD 2.0 2018 midpoint', 'resources', 'land use')	'ATR BM, HT+LT, + CCS (MDEA), 98 (average), digestate incineration' (megajoule, CH, None)	Catalysts&adsorbents	0.00112991
('ILCD 2.0 2018 midpoint', 'resources', 'land use')	'ATR BM, HT+LT, + CCS (MDEA), 98 (average), digestate incineration' (megajoule, CH, None)	CO2 transport and storage	0.00269994
('ILCD 2.0 2018 midpoint', 'resources', 'land use')	'ATR BM, HT+LT, + CCS (MDEA), 98 (average), digestate incineration' (megajoule, CH, None)	Direct CO2 emissions	0
('ILCD 2.0 2018 midpoint', 'resources', 'land use')	'ATR BM, HT+LT, + CCS (MDEA), 98 (average), digestate incineration' (megajoule, CH, None)	Electricity from/to grid	0.0377822
('ILCD 2.0 2018 midpoint', 'resources', 'land use')	'ATR BM, HT+LT, + CCS (MDEA), 98 (average), digestate incineration' (megajoule, CH, None)	Emissions from fuel burning in furnace	0
('ILCD 2.0 2018 midpoint', 'resources', 'land use')	'ATR BM, HT+LT, + CCS (MDEA), 98 (average), digestate incineration' (megajoule, CH, None)	Fuel supply chain	0.14078
('ILCD 2.0 2018 midpoint', 'resources', 'land use')	'ATR BM, HT+LT, + CCS (MDEA), 98 (average), digestate incineration' (megajoule, CH, None)	Plant infrastructure	0.0215588
('ILCD 2.0 2018 midpoint', 'resources', 'land use')	'ATR BM, HT+LT, + CCS (MDEA), 98 (average), digestate incineration' (megajoule, CH, None)	Water supply	0.000178245
('ILCD 2.0 2018 midpoint', 'resources', 'minerals and metals')	'ATR BM, HT+LT, + CCS (MDEA), 98 (average), digestate incineration' (megajoule, CH, None)	Catalysts&adsorbents	1.55187e-08
('ILCD 2.0 2018 midpoint', 'resources', 'minerals and metals')	'ATR BM, HT+LT, + CCS (MDEA), 98 (average), digestate incineration' (megajoule, CH, None)	CO2 transport and storage	8.87035e-10
('ILCD 2.0 2018 midpoint', 'resources', 'minerals and metals')	'ATR BM, HT+LT, + CCS (MDEA), 98 (average), digestate incineration' (megajoule, CH, None)	Direct CO2 emissions	0
('ILCD 2.0 2018 midpoint', 'resources', 'minerals and metals')	'ATR BM, HT+LT, + CCS (MDEA), 98 (average), digestate incineration' (megajoule, CH, None)	Electricity from/to grid	8.57976e-09
('ILCD 2.0 2018 midpoint', 'resources', 'minerals and metals')	'ATR BM, HT+LT, + CCS (MDEA), 98 (average), digestate incineration' (megajoule, CH, None)	Emissions from fuel burning in furnace	0
('ILCD 2.0 2018 midpoint', 'resources', 'minerals and metals')	'ATR BM, HT+LT, + CCS (MDEA), 98 (average), digestate incineration' (megajoule, CH, None)	Fuel supply chain	1.24661e-06
('ILCD 2.0 2018 midpoint', 'resources', 'minerals and metals')	'ATR BM, HT+LT, + CCS (MDEA), 98 (average), digestate incineration' (megajoule, CH, None)	Plant infrastructure	1.81183e-07
('ILCD 2.0 2018 midpoint', 'resources', 'minerals and metals')	'ATR BM, HT+LT, + CCS (MDEA), 98 (average), digestate incineration' (megajoule, CH, None)	Water supply	6.76658e-10
('ReCiPe Midpoint (H) V1.13', 'metal depletion', 'MDP')	'ATR BM, HT+LT, + CCS (MDEA), 98 (average), digestate incineration' (megajoule, CH, None)	Catalysts&adsorbents	0.00028327
('ReCiPe Midpoint (H) V1.13', 'metal depletion', 'MDP')	'ATR BM, HT+LT, + CCS (MDEA), 98 (average), digestate incineration' (megajoule, CH, None)	CO2 transport and storage	3.90566e-06
('ReCiPe Midpoint (H) V1.13', 'metal depletion', 'MDP')	'ATR BM, HT+LT, + CCS (MDEA), 98 (average), digestate incineration' (megajoule, CH, None)	Direct CO2 emissions	0
('ReCiPe Midpoint (H) V1.13', 'metal depletion', 'MDP')	'ATR BM, HT+LT, + CCS (MDEA), 98 (average), digestate incineration' (megajoule, CH, None)	Electricity from/to grid	3.08149e-05
('ReCiPe Midpoint (H) V1.13', 'metal depletion', 'MDP')	'ATR BM, HT+LT, + CCS (MDEA), 98 (average), digestate incineration' (megajoule, CH, None)	Emissions from fuel burning in furnace	0
('ReCiPe Midpoint (H) V1.13', 'metal depletion', 'MDP')	'ATR BM, HT+LT, + CCS (MDEA), 98 (average), digestate incineration' (megajoule, CH, None)	Fuel supply chain	0.00318383
('ReCiPe Midpoint (H) V1.13', 'metal depletion', 'MDP')	'ATR BM, HT+LT, + CCS (MDEA), 98 (average), digestate incineration' (megajoule, CH, None)	Plant infrastructure	0.000575174
('ReCiPe Midpoint (H) V1.13', 'metal depletion', 'MDP')	'ATR BM, HT+LT, + CCS (MDEA), 98 (average), digestate incineration' (megajoule, CH, None)	Water supply	2.07628e-06
('cumulative energy demand', 'fossil', 'non-renewable energy resources, fossil')	'ATR BM, HT+LT, + CCS (VPSA), 98 (average), cut-off approach' (megajoule, CH, None)	Catalysts&adsorbents	0.00104087
('cumulative energy demand', 'fossil', 'non-renewable energy resources, fossil')	'ATR BM, HT+LT, + CCS (VPSA), 98 (average), cut-off approach' (megajoule, CH, None)	CO2 transport and storage	0.00356432
('cumulative energy demand', 'fossil', 'non-renewable energy resources, fossil')	'ATR BM, HT+LT, + CCS (VPSA), 98 (average), cut-off approach' (megajoule, CH, None)	Direct CO2 emissions	0
('cumulative energy demand', 'fossil', 'non-renewable energy resources, fossil')	'ATR BM, HT+LT, + CCS (VPSA), 98 (average), cut-off approach' (megajoule, CH, None)	Electricity from/to grid	0.0636453
('cumulative energy demand', 'fossil', 'non-renewable energy resources, fossil')	'ATR BM, HT+LT, + CCS (VPSA), 98 (average), cut-off approach' (megajoule, CH, None)	Emissions from fuel burning in furnace	0
('cumulative energy demand', 'fossil', 'non-renewable energy resources, fossil')	'ATR BM, HT+LT, + CCS (VPSA), 98 (average), cut-off approach' (megajoule, CH, None)	Fuel supply chain	0.117524
('cumulative energy demand', 'fossil', 'non-renewable energy resources, fossil')	'ATR BM, HT+LT, + CCS (VPSA), 98 (average), cut-off approach' (megajoule, CH, None)	Plant infrastructure	0.00693805
('cumulative energy demand', 'fossil', 'non-renewable energy resources, fossil')	'ATR BM, HT+LT, + CCS (VPSA), 98 (average), cut-off approach' (megajoule, CH, None)	Water supply	0.000277398
('cumulative energy demand', 'nuclear', 'non-renewable energy resources, nuclear')	'ATR BM, HT+LT, + CCS (VPSA), 98 (average), cut-off approach' (megajoule, CH, None)	Catalysts&adsorbents	8.69457e-05
('cumulative energy demand', 'nuclear', 'non-renewable energy resources, nuclear')	'ATR BM, HT+LT, + CCS (VPSA), 98 (average), cut-off approach' (megajoule, CH, None)	CO2 transport and storage	0.00269673
('cumulative energy demand', 'nuclear', 'non-renewable energy resources, nuclear')	'ATR BM, HT+LT, + CCS (VPSA), 98 (average), cut-off approach' (megajoule, CH, None)	Direct CO2 emissions	0
('cumulative energy demand', 'nuclear', 'non-renewable energy resources, nuclear')	'ATR BM, HT+LT, + CCS (VPSA), 98 (average), cut-off approach' (megajoule, CH, None)	Electricity from/to grid	0.0502216
('cumulative energy demand', 'nuclear', 'non-renewable energy resources, nuclear')	'ATR BM, HT+LT, + CCS (VPSA), 98 (average), cut-off approach' (megajoule, CH, None)	Emissions from fuel burning in furnace	0
('cumulative energy demand', 'nuclear', 'non-renewable energy resources, nuclear')	'ATR BM, HT+LT, + CCS (VPSA), 98 (average), cut-off approach' (megajoule, CH, None)	Fuel supply chain	0.0313494
('cumulative energy demand', 'nuclear', 'non-renewable energy resources, nuclear')	'ATR BM, HT+LT, + CCS (VPSA), 98 (average), cut-off approach' (megajoule, CH, None)	Plant infrastructure	0.00171997
('cumulative energy demand', 'nuclear', 'non-renewable energy resources, nuclear')	'ATR BM, HT+LT, + CCS (VPSA), 98 (average), cut-off approach' (megajoule, CH, None)	Water supply	5.8647e-05
('cumulative energy demand', 'primary forest', 'non-renewable energy resources, primary forest')	'ATR BM, HT+LT, + CCS (VPSA), 98 (average), cut-off approach' (megajoule, CH, None)	Catalysts&adsorbents	2.14448e-08
('cumulative energy demand', 'primary forest', 'non-renewable energy resources, primary forest')	'ATR BM, HT+LT, + CCS (VPSA), 98 (average), cut-off approach' (megajoule, CH, None)	CO2 transport and storage	5.24757e-08
('cumulative energy demand', 'primary forest', 'non-renewable energy resources, primary forest')	'ATR BM, HT+LT, + CCS (VPSA), 98 (average), cut-off approach' (megajoule, CH, None)	Direct CO2 emissions	0
('cumulative energy demand', 'primary forest', 'non-renewable energy resources, primary forest')	'ATR BM, HT+LT, + CCS (VPSA), 98 (average), cut-off approach' (megajoule, CH, None)	Electricity from/to grid	4.42935e-07
('cumulative energy demand', 'primary forest', 'non-renewable energy resources, primary forest')	'ATR BM, HT+LT, + CCS (VPSA), 98 (average), cut-off approach' (megajoule, CH, None)	Emissions from fuel burning in furnace	0
('cumulative energy demand', 'primary forest', 'non-renewable energy resources, primary forest')	'ATR BM, HT+LT, + CCS (VPSA), 98 (average), cut-off approach' (megajoule, CH, None)	Fuel supply chain	2.09238e-06
('cumulative energy demand', 'primary forest', 'non-renewable energy resources, primary forest')	'ATR BM, HT+LT, + CCS (VPSA), 98 (average), cut-off approach' (megajoule, CH, None)	Plant infrastructure	3.70972e-07
('cumulative energy demand', 'primary forest', 'non-renewable energy resources, primary forest')	'ATR BM, HT+LT, + CCS (VPSA), 98 (average), cut-off approach' (megajoule, CH, None)	Water supply	4.68061e-09
('ILCD 2.0 2018 midpoint', 'climate change', 'climate change total')	'ATR BM, HT+LT, + CCS (VPSA), 98 (average), cut-off approach' (megajoule, CH, None)	Catalysts&adsorbents	9.12173e-05
('ILCD 2.0 2018 midpoint', 'climate change', 'climate change total')	'ATR BM, HT+LT, + CCS (VPSA), 98 (average), cut-off approach' (megajoule, CH, None)	CO2 transport and storage	0.000293554
('ILCD 2.0 2018 midpoint', 'climate change', 'climate change total')	'ATR BM, HT+LT, + CCS (VPSA), 98 (average), cut-off approach' (megajoule, CH, None)	Direct CO2 emissions	0.0014239
('ILCD 2.0 2018 midpoint', 'climate change', 'climate change total')	'ATR BM, HT+LT, + CCS (VPSA), 98 (average), cut-off approach' (megajoule, CH, None)	Electricity from/to grid	0.00526943
('ILCD 2.0 2018 midpoint', 'climate change', 'climate change total')	'ATR BM, HT+LT, + CCS (VPSA), 98 (average), cut-off approach' (megajoule, CH, None)	Emissions from fuel burning in furnace	0
('ILCD 2.0 2018 midpoint', 'climate change', 'climate change total')	'ATR BM, HT+LT, + CCS (VPSA), 98 (average), cut-off approach' (megajoule, CH, None)	Fuel supply chain	0.0889582
('ILCD 2.0 2018 midpoint', 'climate change', 'climate change total')	'ATR BM, HT+LT, + CCS (VPSA), 98 (average), cut-off approach' (megajoule, CH, None)	Plant infrastructure	0.000631278
('ILCD 2.0 2018 midpoint', 'climate change', 'climate change total')	'ATR BM, HT+LT, + CCS (VPSA), 98 (average), cut-off approach' (megajoule, CH, None)	Water supply	2.27992e-05
('ILCD 2.0 2018 midpoint', 'ecosystem quality', 'freshwater and terrestrial acidification')	'ATR BM, HT+LT, + CCS (VPSA), 98 (average), cut-off approach' (megajoule, CH, None)	Catalysts&adsorbents	7.85337e-06
('ILCD 2.0 2018 midpoint', 'ecosystem quality', 'freshwater and terrestrial acidification')	'ATR BM, HT+LT, + CCS (VPSA), 98 (average), cut-off approach' (megajoule, CH, None)	CO2 transport and storage	1.6434e-06
('ILCD 2.0 2018 midpoint', 'ecosystem quality', 'freshwater and terrestrial acidification')	'ATR BM, HT+LT, + CCS (VPSA), 98 (average), cut-off approach' (megajoule, CH, None)	Direct CO2 emissions	0
('ILCD 2.0 2018 midpoint', 'ecosystem quality', 'freshwater and terrestrial acidification')	'ATR BM, HT+LT, + CCS (VPSA), 98 (average), cut-off approach' (megajoule, CH, None)	Electricity from/to grid	2.72611e-05
('ILCD 2.0 2018 midpoint', 'ecosystem quality', 'freshwater and terrestrial acidification')	'ATR BM, HT+LT, + CCS (VPSA), 98 (average), cut-off approach' (megajoule, CH, None)	Emissions from fuel burning in furnace	1.8498e-05
('ILCD 2.0 2018 midpoint', 'ecosystem quality', 'freshwater and terrestrial acidification')	'ATR BM, HT+LT, + CCS (VPSA), 98 (average), cut-off approach' (megajoule, CH, None)	Fuel supply chain	0.000125693
('ILCD 2.0 2018 midpoint', 'ecosystem quality', 'freshwater and terrestrial acidification')	'ATR BM, HT+LT, + CCS (VPSA), 98 (average), cut-off approach' (megajoule, CH, None)	Plant infrastructure	7.89889e-06
('ILCD 2.0 2018 midpoint', 'ecosystem quality', 'freshwater and terrestrial acidification')	'ATR BM, HT+LT, + CCS (VPSA), 98 (average), cut-off approach' (megajoule, CH, None)	Water supply	2.47424e-07
('ILCD 2.0 2018 midpoint', 'ecosystem quality', 'freshwater ecotoxicity')	'ATR BM, HT+LT, + CCS (VPSA), 98 (average), cut-off approach' (megajoule, CH, None)	Catalysts&adsorbents	0.000628182
('ILCD 2.0 2018 midpoint', 'ecosystem quality', 'freshwater ecotoxicity')	'ATR BM, HT+LT, + CCS (VPSA), 98 (average), cut-off approach' (megajoule, CH, None)	CO2 transport and storage	9.93802e-05
('ILCD 2.0 2018 midpoint', 'ecosystem quality', 'freshwater ecotoxicity')	'ATR BM, HT+LT, + CCS (VPSA), 98 (average), cut-off approach' (megajoule, CH, None)	Direct CO2 emissions	0
('ILCD 2.0 2018 midpoint', 'ecosystem quality', 'freshwater ecotoxicity')	'ATR BM, HT+LT, + CCS (VPSA), 98 (average), cut-off approach' (megajoule, CH, None)	Electricity from/to grid	0.00132705
('ILCD 2.0 2018 midpoint', 'ecosystem quality', 'freshwater ecotoxicity')	'ATR BM, HT+LT, + CCS (VPSA), 98 (average), cut-off approach' (megajoule, CH, None)	Emissions from fuel burning in furnace	0
('ILCD 2.0 2018 midpoint', 'ecosystem quality', 'freshwater ecotoxicity')	'ATR BM, HT+LT, + CCS (VPSA), 98 (average), cut-off approach' (megajoule, CH, None)	Fuel supply chain	0.0123717
('ILCD 2.0 2018 midpoint', 'ecosystem quality', 'freshwater ecotoxicity')	'ATR BM, HT+LT, + CCS (VPSA), 98 (average), cut-off approach' (megajoule, CH, None)	Plant infrastructure	0.00217871
('ILCD 2.0 2018 midpoint', 'ecosystem quality', 'freshwater ecotoxicity')	'ATR BM, HT+LT, + CCS (VPSA), 98 (average), cut-off approach' (megajoule, CH, None)	Water supply	3.76328e-05
('ILCD 2.0 2018 midpoint', 'ecosystem quality', 'marine eutrophication')	'ATR BM, HT+LT, + CCS (VPSA), 98 (average), cut-off approach' (megajoule, CH, None)	Catalysts&adsorbents	2.43506e-07
('ILCD 2.0 2018 midpoint', 'ecosystem quality', 'marine eutrophication')	'ATR BM, HT+LT, + CCS (VPSA), 98 (average), cut-off approach' (megajoule, CH, None)	CO2 transport and storage	2.98923e-07
('ILCD 2.0 2018 midpoint', 'ecosystem quality', 'marine eutrophication')	'ATR BM, HT+LT, + CCS (VPSA), 98 (average), cut-off approach' (megajoule, CH, None)	Direct CO2 emissions	0
('ILCD 2.0 2018 midpoint', 'ecosystem quality', 'marine eutrophication')	'ATR BM, HT+LT, + CCS (VPSA), 98 (average), cut-off approach' (megajoule, CH, None)	Electricity from/to grid	4.71103e-06
('ILCD 2.0 2018 midpoint', 'ecosystem quality', 'marine eutrophication')	'ATR BM, HT+LT, + CCS (VPSA), 98 (average), cut-off approach' (megajoule, CH, None)	Emissions from fuel burning in furnace	9.72394e-06
('ILCD 2.0 2018 midpoint', 'ecosystem quality', 'marine eutrophication')	'ATR BM, HT+LT, + CCS (VPSA), 98 (average), cut-off approach' (megajoule, CH, None)	Fuel supply chain	1.04441e-05
('ILCD 2.0 2018 midpoint', 'ecosystem quality', 'marine eutrophication')	'ATR BM, HT+LT, + CCS (VPSA), 98 (average), cut-off approach' (megajoule, CH, None)	Plant infrastructure	8.83638e-07
('ILCD 2.0 2018 midpoint', 'ecosystem quality', 'marine eutrophication')	'ATR BM, HT+LT, + CCS (VPSA), 98 (average), cut-off approach' (megajoule, CH, None)	Water supply	2.40939e-08
('ILCD 2.0 2018 midpoint', 'ecosystem quality', 'terrestrial eutrophication')	'ATR BM, HT+LT, + CCS (VPSA), 98 (average), cut-off approach' (megajoule, CH, None)	Catalysts&adsorbents	3.26269e-06
('ILCD 2.0 2018 midpoint', 'ecosystem quality', 'terrestrial eutrophication')	'ATR BM, HT+LT, + CCS (VPSA), 98 (average), cut-off approach' (megajoule, CH, None)	CO2 transport and storage	2.86096e-06
('ILCD 2.0 2018 midpoint', 'ecosystem quality', 'terrestrial eutrophication')	'ATR BM, HT+LT, + CCS (VPSA), 98 (average), cut-off approach' (megajoule, CH, None)	Direct CO2 emissions	0
('ILCD 2.0 2018 midpoint', 'ecosystem quality', 'terrestrial eutrophication')	'ATR BM, HT+LT, + CCS (VPSA), 98 (average), cut-off approach' (megajoule, CH, None)	Electricity from/to grid	4.37401e-05
('ILCD 2.0 2018 midpoint', 'ecosystem quality', 'terrestrial eutrophication')	'ATR BM, HT+LT, + CCS (VPSA), 98 (average), cut-off approach' (megajoule, CH, None)	Emissions from fuel burning in furnace	0.000106488
('ILCD 2.0 2018 midpoint', 'ecosystem quality', 'terrestrial eutrophication')	'ATR BM, HT+LT, + CCS (VPSA), 98 (average), cut-off approach' (megajoule, CH, None)	Fuel supply chain	0.000184863
('ILCD 2.0 2018 midpoint', 'ecosystem quality', 'terrestrial eutrophication')	'ATR BM, HT+LT, + CCS (VPSA), 98 (average), cut-off approach' (megajoule, CH, None)	Plant infrastructure	1.03808e-05
('ILCD 2.0 2018 midpoint', 'ecosystem quality', 'terrestrial eutrophication')	'ATR BM, HT+LT, + CCS (VPSA), 98 (average), cut-off approach' (megajoule, CH, None)	Water supply	2.44597e-07
('ILCD 2.0 2018 midpoint', 'human health', 'carcinogenic effects')	'ATR BM, HT+LT, + CCS (VPSA), 98 (average), cut-off approach' (megajoule, CH, None)	Catalysts&adsorbents	2.32399e-11
('ILCD 2.0 2018 midpoint', 'human health', 'carcinogenic effects')	'ATR BM, HT+LT, + CCS (VPSA), 98 (average), cut-off approach' (megajoule, CH, None)	CO2 transport and storage	3.78328e-12
('ILCD 2.0 2018 midpoint', 'human health', 'carcinogenic effects')	'ATR BM, HT+LT, + CCS (VPSA), 98 (average), cut-off approach' (megajoule, CH, None)	Direct CO2 emissions	0
('ILCD 2.0 2018 midpoint', 'human health', 'carcinogenic effects')	'ATR BM, HT+LT, + CCS (VPSA), 98 (average), cut-off approach' (megajoule, CH, None)	Electricity from/to grid	3.61255e-11
('ILCD 2.0 2018 midpoint', 'human health', 'carcinogenic effects')	'ATR BM, HT+LT, + CCS (VPSA), 98 (average), cut-off approach' (megajoule, CH, None)	Emissions from fuel burning in furnace	0
('ILCD 2.0 2018 midpoint', 'human health', 'carcinogenic effects')	'ATR BM, HT+LT, + CCS (VPSA), 98 (average), cut-off approach' (megajoule, CH, None)	Fuel supply chain	3.48412e-10
('ILCD 2.0 2018 midpoint', 'human health', 'carcinogenic effects')	'ATR BM, HT+LT, + CCS (VPSA), 98 (average), cut-off approach' (megajoule, CH, None)	Plant infrastructure	7.30486e-11
('ILCD 2.0 2018 midpoint', 'human health', 'carcinogenic effects')	'ATR BM, HT+LT, + CCS (VPSA), 98 (average), cut-off approach' (megajoule, CH, None)	Water supply	9.08743e-13
('ILCD 2.0 2018 midpoint', 'human health', 'ionising radiation')	'ATR BM, HT+LT, + CCS (VPSA), 98 (average), cut-off approach' (megajoule, CH, None)	Catalysts&adsorbents	6.50284e-06
('ILCD 2.0 2018 midpoint', 'human health', 'ionising radiation')	'ATR BM, HT+LT, + CCS (VPSA), 98 (average), cut-off approach' (megajoule, CH, None)	CO2 transport and storage	0.000156136
('ILCD 2.0 2018 midpoint', 'human health', 'ionising radiation')	'ATR BM, HT+LT, + CCS (VPSA), 98 (average), cut-off approach' (megajoule, CH, None)	Direct CO2 emissions	0
('ILCD 2.0 2018 midpoint', 'human health', 'ionising radiation')	'ATR BM, HT+LT, + CCS (VPSA), 98 (average), cut-off approach' (megajoule, CH, None)	Electricity from/to grid	0.00291259
('ILCD 2.0 2018 midpoint', 'human health', 'ionising radiation')	'ATR BM, HT+LT, + CCS (VPSA), 98 (average), cut-off approach' (megajoule, CH, None)	Emissions from fuel burning in furnace	0
('ILCD 2.0 2018 midpoint', 'human health', 'ionising radiation')	'ATR BM, HT+LT, + CCS (VPSA), 98 (average), cut-off approach' (megajoule, CH, None)	Fuel supply chain	0.00207019
('ILCD 2.0 2018 midpoint', 'human health', 'ionising radiation')	'ATR BM, HT+LT, + CCS (VPSA), 98 (average), cut-off approach' (megajoule, CH, None)	Plant infrastructure	0.00010641
('ILCD 2.0 2018 midpoint', 'human health', 'ionising radiation')	'ATR BM, HT+LT, + CCS (VPSA), 98 (average), cut-off approach' (megajoule, CH, None)	Water supply	3.82122e-06
('ILCD 2.0 2018 midpoint', 'human health', 'non-carcinogenic effects')	'ATR BM, HT+LT, + CCS (VPSA), 98 (average), cut-off approach' (megajoule, CH, None)	Catalysts&adsorbents	1.68319e-10
('ILCD 2.0 2018 midpoint', 'human health', 'non-carcinogenic effects')	'ATR BM, HT+LT, + CCS (VPSA), 98 (average), cut-off approach' (megajoule, CH, None)	CO2 transport and storage	3.29749e-11
('ILCD 2.0 2018 midpoint', 'human health', 'non-carcinogenic effects')	'ATR BM, HT+LT, + CCS (VPSA), 98 (average), cut-off approach' (megajoule, CH, None)	Direct CO2 emissions	0
('ILCD 2.0 2018 midpoint', 'human health', 'non-carcinogenic effects')	'ATR BM, HT+LT, + CCS (VPSA), 98 (average), cut-off approach' (megajoule, CH, None)	Electricity from/to grid	5.23526e-10
('ILCD 2.0 2018 midpoint', 'human health', 'non-carcinogenic effects')	'ATR BM, HT+LT, + CCS (VPSA), 98 (average), cut-off approach' (megajoule, CH, None)	Emissions from fuel burning in furnace	0
('ILCD 2.0 2018 midpoint', 'human health', 'non-carcinogenic effects')	'ATR BM, HT+LT, + CCS (VPSA), 98 (average), cut-off approach' (megajoule, CH, None)	Fuel supply chain	3.22996e-09
('ILCD 2.0 2018 midpoint', 'human health', 'non-carcinogenic effects')	'ATR BM, HT+LT, + CCS (VPSA), 98 (average), cut-off approach' (megajoule, CH, None)	Plant infrastructure	5.72599e-10
('ILCD 2.0 2018 midpoint', 'human health', 'non-carcinogenic effects')	'ATR BM, HT+LT, + CCS (VPSA), 98 (average), cut-off approach' (megajoule, CH, None)	Water supply	6.85545e-12
('ILCD 2.0 2018 midpoint', 'human health', 'ozone layer depletion')	'ATR BM, HT+LT, + CCS (VPSA), 98 (average), cut-off approach' (megajoule, CH, None)	Catalysts&adsorbents	1.38511e-11
('ILCD 2.0 2018 midpoint', 'human health', 'ozone layer depletion')	'ATR BM, HT+LT, + CCS (VPSA), 98 (average), cut-off approach' (megajoule, CH, None)	CO2 transport and storage	2.53399e-11
('ILCD 2.0 2018 midpoint', 'human health', 'ozone layer depletion')	'ATR BM, HT+LT, + CCS (VPSA), 98 (average), cut-off approach' (megajoule, CH, None)	Direct CO2 emissions	0
('ILCD 2.0 2018 midpoint', 'human health', 'ozone layer depletion')	'ATR BM, HT+LT, + CCS (VPSA), 98 (average), cut-off approach' (megajoule, CH, None)	Electricity from/to grid	4.51158e-10
('ILCD 2.0 2018 midpoint', 'human health', 'ozone layer depletion')	'ATR BM, HT+LT, + CCS (VPSA), 98 (average), cut-off approach' (megajoule, CH, None)	Emissions from fuel burning in furnace	0
('ILCD 2.0 2018 midpoint', 'human health', 'ozone layer depletion')	'ATR BM, HT+LT, + CCS (VPSA), 98 (average), cut-off approach' (megajoule, CH, None)	Fuel supply chain	9.78015e-10
('ILCD 2.0 2018 midpoint', 'human health', 'ozone layer depletion')	'ATR BM, HT+LT, + CCS (VPSA), 98 (average), cut-off approach' (megajoule, CH, None)	Plant infrastructure	4.70934e-11
('ILCD 2.0 2018 midpoint', 'human health', 'ozone layer depletion')	'ATR BM, HT+LT, + CCS (VPSA), 98 (average), cut-off approach' (megajoule, CH, None)	Water supply	1.53781e-11
('ILCD 2.0 2018 midpoint', 'human health', 'photochemical ozone creation')	'ATR BM, HT+LT, + CCS (VPSA), 98 (average), cut-off approach' (megajoule, CH, None)	Catalysts&adsorbents	1.11653e-06
('ILCD 2.0 2018 midpoint', 'human health', 'photochemical ozone creation')	'ATR BM, HT+LT, + CCS (VPSA), 98 (average), cut-off approach' (megajoule, CH, None)	CO2 transport and storage	7.34787e-07
('ILCD 2.0 2018 midpoint', 'human health', 'photochemical ozone creation')	'ATR BM, HT+LT, + CCS (VPSA), 98 (average), cut-off approach' (megajoule, CH, None)	Direct CO2 emissions	0
('ILCD 2.0 2018 midpoint', 'human health', 'photochemical ozone creation')	'ATR BM, HT+LT, + CCS (VPSA), 98 (average), cut-off approach' (megajoule, CH, None)	Electricity from/to grid	1.08473e-05
('ILCD 2.0 2018 midpoint', 'human health', 'photochemical ozone creation')	'ATR BM, HT+LT, + CCS (VPSA), 98 (average), cut-off approach' (megajoule, CH, None)	Emissions from fuel burning in furnace	2.49973e-05
('ILCD 2.0 2018 midpoint', 'human health', 'photochemical ozone creation')	'ATR BM, HT+LT, + CCS (VPSA), 98 (average), cut-off approach' (megajoule, CH, None)	Fuel supply chain	3.27638e-05
('ILCD 2.0 2018 midpoint', 'human health', 'photochemical ozone creation')	'ATR BM, HT+LT, + CCS (VPSA), 98 (average), cut-off approach' (megajoule, CH, None)	Plant infrastructure	2.97279e-06
('ILCD 2.0 2018 midpoint', 'human health', 'photochemical ozone creation')	'ATR BM, HT+LT, + CCS (VPSA), 98 (average), cut-off approach' (megajoule, CH, None)	Water supply	7.74423e-08
('ILCD 2.0 2018 midpoint', 'human health', 'respiratory effects, inorganics')	'ATR BM, HT+LT, + CCS (VPSA), 98 (average), cut-off approach' (megajoule, CH, None)	Catalysts&adsorbents	1.45044e-11
('ILCD 2.0 2018 midpoint', 'human health', 'respiratory effects, inorganics')	'ATR BM, HT+LT, + CCS (VPSA), 98 (average), cut-off approach' (megajoule, CH, None)	CO2 transport and storage	5.66866e-12
('ILCD 2.0 2018 midpoint', 'human health', 'respiratory effects, inorganics')	'ATR BM, HT+LT, + CCS (VPSA), 98 (average), cut-off approach' (megajoule, CH, None)	Direct CO2 emissions	0
('ILCD 2.0 2018 midpoint', 'human health', 'respiratory effects, inorganics')	'ATR BM, HT+LT, + CCS (VPSA), 98 (average), cut-off approach' (megajoule, CH, None)	Electricity from/to grid	7.97718e-11
('ILCD 2.0 2018 midpoint', 'human health', 'respiratory effects, inorganics')	'ATR BM, HT+LT, + CCS (VPSA), 98 (average), cut-off approach' (megajoule, CH, None)	Emissions from fuel burning in furnace	3.99956e-11
('ILCD 2.0 2018 midpoint', 'human health', 'respiratory effects, inorganics')	'ATR BM, HT+LT, + CCS (VPSA), 98 (average), cut-off approach' (megajoule, CH, None)	Fuel supply chain	8.98048e-10
('ILCD 2.0 2018 midpoint', 'human health', 'respiratory effects, inorganics')	'ATR BM, HT+LT, + CCS (VPSA), 98 (average), cut-off approach' (megajoule, CH, None)	Plant infrastructure	4.70312e-11
('ILCD 2.0 2018 midpoint', 'human health', 'respiratory effects, inorganics')	'ATR BM, HT+LT, + CCS (VPSA), 98 (average), cut-off approach' (megajoule, CH, None)	Water supply	1.74322e-12
('ILCD 2.0 2018 midpoint', 'resources', 'fossils')	'ATR BM, HT+LT, + CCS (VPSA), 98 (average), cut-off approach' (megajoule, CH, None)	Catalysts&adsorbents	0.00122557
('ILCD 2.0 2018 midpoint', 'resources', 'fossils')	'ATR BM, HT+LT, + CCS (VPSA), 98 (average), cut-off approach' (megajoule, CH, None)	CO2 transport and storage	0.00675226
('ILCD 2.0 2018 midpoint', 'resources', 'fossils')	'ATR BM, HT+LT, + CCS (VPSA), 98 (average), cut-off approach' (megajoule, CH, None)	Direct CO2 emissions	0
('ILCD 2.0 2018 midpoint', 'resources', 'fossils')	'ATR BM, HT+LT, + CCS (VPSA), 98 (average), cut-off approach' (megajoule, CH, None)	Electricity from/to grid	0.122681
('ILCD 2.0 2018 midpoint', 'resources', 'fossils')	'ATR BM, HT+LT, + CCS (VPSA), 98 (average), cut-off approach' (megajoule, CH, None)	Emissions from fuel burning in furnace	0
('ILCD 2.0 2018 midpoint', 'resources', 'fossils')	'ATR BM, HT+LT, + CCS (VPSA), 98 (average), cut-off approach' (megajoule, CH, None)	Fuel supply chain	0.1591
('ILCD 2.0 2018 midpoint', 'resources', 'fossils')	'ATR BM, HT+LT, + CCS (VPSA), 98 (average), cut-off approach' (megajoule, CH, None)	Plant infrastructure	0.009569
('ILCD 2.0 2018 midpoint', 'resources', 'fossils')	'ATR BM, HT+LT, + CCS (VPSA), 98 (average), cut-off approach' (megajoule, CH, None)	Water supply	0.000352253
('ILCD 2.0 2018 midpoint', 'resources', 'land use')	'ATR BM, HT+LT, + CCS (VPSA), 98 (average), cut-off approach' (megajoule, CH, None)	Catalysts&adsorbents	0.00112991
('ILCD 2.0 2018 midpoint', 'resources', 'land use')	'ATR BM, HT+LT, + CCS (VPSA), 98 (average), cut-off approach' (megajoule, CH, None)	CO2 transport and storage	0.00276696
('ILCD 2.0 2018 midpoint', 'resources', 'land use')	'ATR BM, HT+LT, + CCS (VPSA), 98 (average), cut-off approach' (megajoule, CH, None)	Direct CO2 emissions	0
('ILCD 2.0 2018 midpoint', 'resources', 'land use')	'ATR BM, HT+LT, + CCS (VPSA), 98 (average), cut-off approach' (megajoule, CH, None)	Electricity from/to grid	0.0539157
('ILCD 2.0 2018 midpoint', 'resources', 'land use')	'ATR BM, HT+LT, + CCS (VPSA), 98 (average), cut-off approach' (megajoule, CH, None)	Emissions from fuel burning in furnace	0
('ILCD 2.0 2018 midpoint', 'resources', 'land use')	'ATR BM, HT+LT, + CCS (VPSA), 98 (average), cut-off approach' (megajoule, CH, None)	Fuel supply chain	0.141476
('ILCD 2.0 2018 midpoint', 'resources', 'land use')	'ATR BM, HT+LT, + CCS (VPSA), 98 (average), cut-off approach' (megajoule, CH, None)	Plant infrastructure	0.0215587
('ILCD 2.0 2018 midpoint', 'resources', 'land use')	'ATR BM, HT+LT, + CCS (VPSA), 98 (average), cut-off approach' (megajoule, CH, None)	Water supply	0.000178245
('ILCD 2.0 2018 midpoint', 'resources', 'minerals and metals')	'ATR BM, HT+LT, + CCS (VPSA), 98 (average), cut-off approach' (megajoule, CH, None)	Catalysts&adsorbents	1.55187e-08
('ILCD 2.0 2018 midpoint', 'resources', 'minerals and metals')	'ATR BM, HT+LT, + CCS (VPSA), 98 (average), cut-off approach' (megajoule, CH, None)	CO2 transport and storage	9.09055e-10
('ILCD 2.0 2018 midpoint', 'resources', 'minerals and metals')	'ATR BM, HT+LT, + CCS (VPSA), 98 (average), cut-off approach' (megajoule, CH, None)	Direct CO2 emissions	0
('ILCD 2.0 2018 midpoint', 'resources', 'minerals and metals')	'ATR BM, HT+LT, + CCS (VPSA), 98 (average), cut-off approach' (megajoule, CH, None)	Electricity from/to grid	1.22434e-08
('ILCD 2.0 2018 midpoint', 'resources', 'minerals and metals')	'ATR BM, HT+LT, + CCS (VPSA), 98 (average), cut-off approach' (megajoule, CH, None)	Emissions from fuel burning in furnace	0
('ILCD 2.0 2018 midpoint', 'resources', 'minerals and metals')	'ATR BM, HT+LT, + CCS (VPSA), 98 (average), cut-off approach' (megajoule, CH, None)	Fuel supply chain	1.25277e-06
('ILCD 2.0 2018 midpoint', 'resources', 'minerals and metals')	'ATR BM, HT+LT, + CCS (VPSA), 98 (average), cut-off approach' (megajoule, CH, None)	Plant infrastructure	1.81182e-07
('ILCD 2.0 2018 midpoint', 'resources', 'minerals and metals')	'ATR BM, HT+LT, + CCS (VPSA), 98 (average), cut-off approach' (megajoule, CH, None)	Water supply	6.76656e-10
('ReCiPe Midpoint (H) V1.13', 'metal depletion', 'MDP')	'ATR BM, HT+LT, + CCS (VPSA), 98 (average), cut-off approach' (megajoule, CH, None)	Catalysts&adsorbents	0.00028327
('ReCiPe Midpoint (H) V1.13', 'metal depletion', 'MDP')	'ATR BM, HT+LT, + CCS (VPSA), 98 (average), cut-off approach' (megajoule, CH, None)	CO2 transport and storage	4.00261e-06
('ReCiPe Midpoint (H) V1.13', 'metal depletion', 'MDP')	'ATR BM, HT+LT, + CCS (VPSA), 98 (average), cut-off approach' (megajoule, CH, None)	Direct CO2 emissions	0
('ReCiPe Midpoint (H) V1.13', 'metal depletion', 'MDP')	'ATR BM, HT+LT, + CCS (VPSA), 98 (average), cut-off approach' (megajoule, CH, None)	Electricity from/to grid	4.39732e-05
('ReCiPe Midpoint (H) V1.13', 'metal depletion', 'MDP')	'ATR BM, HT+LT, + CCS (VPSA), 98 (average), cut-off approach' (megajoule, CH, None)	Emissions from fuel burning in furnace	0
('ReCiPe Midpoint (H) V1.13', 'metal depletion', 'MDP')	'ATR BM, HT+LT, + CCS (VPSA), 98 (average), cut-off approach' (megajoule, CH, None)	Fuel supply chain	0.00319958
('ReCiPe Midpoint (H) V1.13', 'metal depletion', 'MDP')	'ATR BM, HT+LT, + CCS (VPSA), 98 (average), cut-off approach' (megajoule, CH, None)	Plant infrastructure	0.000575172
('ReCiPe Midpoint (H) V1.13', 'metal depletion', 'MDP')	'ATR BM, HT+LT, + CCS (VPSA), 98 (average), cut-off approach' (megajoule, CH, None)	Water supply	2.07627e-06
('cumulative energy demand', 'fossil', 'non-renewable energy resources, fossil')	'ATR BM, HT+LT, + CCS (VPSA), 98 (average), digestate incineration' (megajoule, CH, None)	Catalysts&adsorbents	0.00104087
('cumulative energy demand', 'fossil', 'non-renewable energy resources, fossil')	'ATR BM, HT+LT, + CCS (VPSA), 98 (average), digestate incineration' (megajoule, CH, None)	CO2 transport and storage	0.00356432
('cumulative energy demand', 'fossil', 'non-renewable energy resources, fossil')	'ATR BM, HT+LT, + CCS (VPSA), 98 (average), digestate incineration' (megajoule, CH, None)	Direct CO2 emissions	0
('cumulative energy demand', 'fossil', 'non-renewable energy resources, fossil')	'ATR BM, HT+LT, + CCS (VPSA), 98 (average), digestate incineration' (megajoule, CH, None)	Electricity from/to grid	0.0636453
('cumulative energy demand', 'fossil', 'non-renewable energy resources, fossil')	'ATR BM, HT+LT, + CCS (VPSA), 98 (average), digestate incineration' (megajoule, CH, None)	Emissions from fuel burning in furnace	0
('cumulative energy demand', 'fossil', 'non-renewable energy resources, fossil')	'ATR BM, HT+LT, + CCS (VPSA), 98 (average), digestate incineration' (megajoule, CH, None)	Fuel supply chain	0.117524
('cumulative energy demand', 'fossil', 'non-renewable energy resources, fossil')	'ATR BM, HT+LT, + CCS (VPSA), 98 (average), digestate incineration' (megajoule, CH, None)	Plant infrastructure	0.00693805
('cumulative energy demand', 'fossil', 'non-renewable energy resources, fossil')	'ATR BM, HT+LT, + CCS (VPSA), 98 (average), digestate incineration' (megajoule, CH, None)	Water supply	0.000277398
('cumulative energy demand', 'nuclear', 'non-renewable energy resources, nuclear')	'ATR BM, HT+LT, + CCS (VPSA), 98 (average), digestate incineration' (megajoule, CH, None)	Catalysts&adsorbents	8.69457e-05
('cumulative energy demand', 'nuclear', 'non-renewable energy resources, nuclear')	'ATR BM, HT+LT, + CCS (VPSA), 98 (average), digestate incineration' (megajoule, CH, None)	CO2 transport and storage	0.00269673
('cumulative energy demand', 'nuclear', 'non-renewable energy resources, nuclear')	'ATR BM, HT+LT, + CCS (VPSA), 98 (average), digestate incineration' (megajoule, CH, None)	Direct CO2 emissions	0
('cumulative energy demand', 'nuclear', 'non-renewable energy resources, nuclear')	'ATR BM, HT+LT, + CCS (VPSA), 98 (average), digestate incineration' (megajoule, CH, None)	Electricity from/to grid	0.0502216
('cumulative energy demand', 'nuclear', 'non-renewable energy resources, nuclear')	'ATR BM, HT+LT, + CCS (VPSA), 98 (average), digestate incineration' (megajoule, CH, None)	Emissions from fuel burning in furnace	0
('cumulative energy demand', 'nuclear', 'non-renewable energy resources, nuclear')	'ATR BM, HT+LT, + CCS (VPSA), 98 (average), digestate incineration' (megajoule, CH, None)	Fuel supply chain	0.0313494
('cumulative energy demand', 'nuclear', 'non-renewable energy resources, nuclear')	'ATR BM, HT+LT, + CCS (VPSA), 98 (average), digestate incineration' (megajoule, CH, None)	Plant infrastructure	0.00171997
('cumulative energy demand', 'nuclear', 'non-renewable energy resources, nuclear')	'ATR BM, HT+LT, + CCS (VPSA), 98 (average), digestate incineration' (megajoule, CH, None)	Water supply	5.8647e-05
('cumulative energy demand', 'primary forest', 'non-renewable energy resources, primary forest')	'ATR BM, HT+LT, + CCS (VPSA), 98 (average), digestate incineration' (megajoule, CH, None)	Catalysts&adsorbents	2.14448e-08
('cumulative energy demand', 'primary forest', 'non-renewable energy resources, primary forest')	'ATR BM, HT+LT, + CCS (VPSA), 98 (average), digestate incineration' (megajoule, CH, None)	CO2 transport and storage	5.24757e-08
('cumulative energy demand', 'primary forest', 'non-renewable energy resources, primary forest')	'ATR BM, HT+LT, + CCS (VPSA), 98 (average), digestate incineration' (megajoule, CH, None)	Direct CO2 emissions	0
('cumulative energy demand', 'primary forest', 'non-renewable energy resources, primary forest')	'ATR BM, HT+LT, + CCS (VPSA), 98 (average), digestate incineration' (megajoule, CH, None)	Electricity from/to grid	4.42935e-07
('cumulative energy demand', 'primary forest', 'non-renewable energy resources, primary forest')	'ATR BM, HT+LT, + CCS (VPSA), 98 (average), digestate incineration' (megajoule, CH, None)	Emissions from fuel burning in furnace	0
('cumulative energy demand', 'primary forest', 'non-renewable energy resources, primary forest')	'ATR BM, HT+LT, + CCS (VPSA), 98 (average), digestate incineration' (megajoule, CH, None)	Fuel supply chain	2.09238e-06
('cumulative energy demand', 'primary forest', 'non-renewable energy resources, primary forest')	'ATR BM, HT+LT, + CCS (VPSA), 98 (average), digestate incineration' (megajoule, CH, None)	Plant infrastructure	3.70972e-07
('cumulative energy demand', 'primary forest', 'non-renewable energy resources, primary forest')	'ATR BM, HT+LT, + CCS (VPSA), 98 (average), digestate incineration' (megajoule, CH, None)	Water supply	4.68061e-09
('ILCD 2.0 2018 midpoint', 'climate change', 'climate change total')	'ATR BM, HT+LT, + CCS (VPSA), 98 (average), digestate incineration' (megajoule, CH, None)	Catalysts&adsorbents	9.12173e-05
('ILCD 2.0 2018 midpoint', 'climate change', 'climate change total')	'ATR BM, HT+LT, + CCS (VPSA), 98 (average), digestate incineration' (megajoule, CH, None)	CO2 transport and storage	0.000293554
('ILCD 2.0 2018 midpoint', 'climate change', 'climate change total')	'ATR BM, HT+LT, + CCS (VPSA), 98 (average), digestate incineration' (megajoule, CH, None)	Direct CO2 emissions	0.0014239
('ILCD 2.0 2018 midpoint', 'climate change', 'climate change total')	'ATR BM, HT+LT, + CCS (VPSA), 98 (average), digestate incineration' (megajoule, CH, None)	Electricity from/to grid	0.00526943
('ILCD 2.0 2018 midpoint', 'climate change', 'climate change total')	'ATR BM, HT+LT, + CCS (VPSA), 98 (average), digestate incineration' (megajoule, CH, None)	Emissions from fuel burning in furnace	0
('ILCD 2.0 2018 midpoint', 'climate change', 'climate change total')	'ATR BM, HT+LT, + CCS (VPSA), 98 (average), digestate incineration' (megajoule, CH, None)	Fuel supply chain	-0.0648553
('ILCD 2.0 2018 midpoint', 'climate change', 'climate change total')	'ATR BM, HT+LT, + CCS (VPSA), 98 (average), digestate incineration' (megajoule, CH, None)	Plant infrastructure	0.000631278
('ILCD 2.0 2018 midpoint', 'climate change', 'climate change total')	'ATR BM, HT+LT, + CCS (VPSA), 98 (average), digestate incineration' (megajoule, CH, None)	Water supply	2.27992e-05
('ILCD 2.0 2018 midpoint', 'ecosystem quality', 'freshwater and terrestrial acidification')	'ATR BM, HT+LT, + CCS (VPSA), 98 (average), digestate incineration' (megajoule, CH, None)	Catalysts&adsorbents	7.85337e-06
('ILCD 2.0 2018 midpoint', 'ecosystem quality', 'freshwater and terrestrial acidification')	'ATR BM, HT+LT, + CCS (VPSA), 98 (average), digestate incineration' (megajoule, CH, None)	CO2 transport and storage	1.6434e-06
('ILCD 2.0 2018 midpoint', 'ecosystem quality', 'freshwater and terrestrial acidification')	'ATR BM, HT+LT, + CCS (VPSA), 98 (average), digestate incineration' (megajoule, CH, None)	Direct CO2 emissions	0
('ILCD 2.0 2018 midpoint', 'ecosystem quality', 'freshwater and terrestrial acidification')	'ATR BM, HT+LT, + CCS (VPSA), 98 (average), digestate incineration' (megajoule, CH, None)	Electricity from/to grid	2.72611e-05
('ILCD 2.0 2018 midpoint', 'ecosystem quality', 'freshwater and terrestrial acidification')	'ATR BM, HT+LT, + CCS (VPSA), 98 (average), digestate incineration' (megajoule, CH, None)	Emissions from fuel burning in furnace	1.8498e-05
('ILCD 2.0 2018 midpoint', 'ecosystem quality', 'freshwater and terrestrial acidification')	'ATR BM, HT+LT, + CCS (VPSA), 98 (average), digestate incineration' (megajoule, CH, None)	Fuel supply chain	0.000125693
('ILCD 2.0 2018 midpoint', 'ecosystem quality', 'freshwater and terrestrial acidification')	'ATR BM, HT+LT, + CCS (VPSA), 98 (average), digestate incineration' (megajoule, CH, None)	Plant infrastructure	7.89889e-06
('ILCD 2.0 2018 midpoint', 'ecosystem quality', 'freshwater and terrestrial acidification')	'ATR BM, HT+LT, + CCS (VPSA), 98 (average), digestate incineration' (megajoule, CH, None)	Water supply	2.47424e-07
('ILCD 2.0 2018 midpoint', 'ecosystem quality', 'freshwater ecotoxicity')	'ATR BM, HT+LT, + CCS (VPSA), 98 (average), digestate incineration' (megajoule, CH, None)	Catalysts&adsorbents	0.000628182
('ILCD 2.0 2018 midpoint', 'ecosystem quality', 'freshwater ecotoxicity')	'ATR BM, HT+LT, + CCS (VPSA), 98 (average), digestate incineration' (megajoule, CH, None)	CO2 transport and storage	9.93802e-05
('ILCD 2.0 2018 midpoint', 'ecosystem quality', 'freshwater ecotoxicity')	'ATR BM, HT+LT, + CCS (VPSA), 98 (average), digestate incineration' (megajoule, CH, None)	Direct CO2 emissions	0
('ILCD 2.0 2018 midpoint', 'ecosystem quality', 'freshwater ecotoxicity')	'ATR BM, HT+LT, + CCS (VPSA), 98 (average), digestate incineration' (megajoule, CH, None)	Electricity from/to grid	0.00132705
('ILCD 2.0 2018 midpoint', 'ecosystem quality', 'freshwater ecotoxicity')	'ATR BM, HT+LT, + CCS (VPSA), 98 (average), digestate incineration' (megajoule, CH, None)	Emissions from fuel burning in furnace	0
('ILCD 2.0 2018 midpoint', 'ecosystem quality', 'freshwater ecotoxicity')	'ATR BM, HT+LT, + CCS (VPSA), 98 (average), digestate incineration' (megajoule, CH, None)	Fuel supply chain	0.0123717
('ILCD 2.0 2018 midpoint', 'ecosystem quality', 'freshwater ecotoxicity')	'ATR BM, HT+LT, + CCS (VPSA), 98 (average), digestate incineration' (megajoule, CH, None)	Plant infrastructure	0.00217871
('ILCD 2.0 2018 midpoint', 'ecosystem quality', 'freshwater ecotoxicity')	'ATR BM, HT+LT, + CCS (VPSA), 98 (average), digestate incineration' (megajoule, CH, None)	Water supply	3.76328e-05
('ILCD 2.0 2018 midpoint', 'ecosystem quality', 'marine eutrophication')	'ATR BM, HT+LT, + CCS (VPSA), 98 (average), digestate incineration' (megajoule, CH, None)	Catalysts&adsorbents	2.43506e-07
('ILCD 2.0 2018 midpoint', 'ecosystem quality', 'marine eutrophication')	'ATR BM, HT+LT, + CCS (VPSA), 98 (average), digestate incineration' (megajoule, CH, None)	CO2 transport and storage	2.98923e-07
('ILCD 2.0 2018 midpoint', 'ecosystem quality', 'marine eutrophication')	'ATR BM, HT+LT, + CCS (VPSA), 98 (average), digestate incineration' (megajoule, CH, None)	Direct CO2 emissions	0
('ILCD 2.0 2018 midpoint', 'ecosystem quality', 'marine eutrophication')	'ATR BM, HT+LT, + CCS (VPSA), 98 (average), digestate incineration' (megajoule, CH, None)	Electricity from/to grid	4.71103e-06
('ILCD 2.0 2018 midpoint', 'ecosystem quality', 'marine eutrophication')	'ATR BM, HT+LT, + CCS (VPSA), 98 (average), digestate incineration' (megajoule, CH, None)	Emissions from fuel burning in furnace	9.72394e-06
('ILCD 2.0 2018 midpoint', 'ecosystem quality', 'marine eutrophication')	'ATR BM, HT+LT, + CCS (VPSA), 98 (average), digestate incineration' (megajoule, CH, None)	Fuel supply chain	1.04441e-05
('ILCD 2.0 2018 midpoint', 'ecosystem quality', 'marine eutrophication')	'ATR BM, HT+LT, + CCS (VPSA), 98 (average), digestate incineration' (megajoule, CH, None)	Plant infrastructure	8.83638e-07
('ILCD 2.0 2018 midpoint', 'ecosystem quality', 'marine eutrophication')	'ATR BM, HT+LT, + CCS (VPSA), 98 (average), digestate incineration' (megajoule, CH, None)	Water supply	2.40939e-08
('ILCD 2.0 2018 midpoint', 'ecosystem quality', 'terrestrial eutrophication')	'ATR BM, HT+LT, + CCS (VPSA), 98 (average), digestate incineration' (megajoule, CH, None)	Catalysts&adsorbents	3.26269e-06
('ILCD 2.0 2018 midpoint', 'ecosystem quality', 'terrestrial eutrophication')	'ATR BM, HT+LT, + CCS (VPSA), 98 (average), digestate incineration' (megajoule, CH, None)	CO2 transport and storage	2.86096e-06
('ILCD 2.0 2018 midpoint', 'ecosystem quality', 'terrestrial eutrophication')	'ATR BM, HT+LT, + CCS (VPSA), 98 (average), digestate incineration' (megajoule, CH, None)	Direct CO2 emissions	0
('ILCD 2.0 2018 midpoint', 'ecosystem quality', 'terrestrial eutrophication')	'ATR BM, HT+LT, + CCS (VPSA), 98 (average), digestate incineration' (megajoule, CH, None)	Electricity from/to grid	4.37401e-05
('ILCD 2.0 2018 midpoint', 'ecosystem quality', 'terrestrial eutrophication')	'ATR BM, HT+LT, + CCS (VPSA), 98 (average), digestate incineration' (megajoule, CH, None)	Emissions from fuel burning in furnace	0.000106488
('ILCD 2.0 2018 midpoint', 'ecosystem quality', 'terrestrial eutrophication')	'ATR BM, HT+LT, + CCS (VPSA), 98 (average), digestate incineration' (megajoule, CH, None)	Fuel supply chain	0.000184863
('ILCD 2.0 2018 midpoint', 'ecosystem quality', 'terrestrial eutrophication')	'ATR BM, HT+LT, + CCS (VPSA), 98 (average), digestate incineration' (megajoule, CH, None)	Plant infrastructure	1.03808e-05
('ILCD 2.0 2018 midpoint', 'ecosystem quality', 'terrestrial eutrophication')	'ATR BM, HT+LT, + CCS (VPSA), 98 (average), digestate incineration' (megajoule, CH, None)	Water supply	2.44597e-07
('ILCD 2.0 2018 midpoint', 'human health', 'carcinogenic effects')	'ATR BM, HT+LT, + CCS (VPSA), 98 (average), digestate incineration' (megajoule, CH, None)	Catalysts&adsorbents	2.32399e-11
('ILCD 2.0 2018 midpoint', 'human health', 'carcinogenic effects')	'ATR BM, HT+LT, + CCS (VPSA), 98 (average), digestate incineration' (megajoule, CH, None)	CO2 transport and storage	3.78328e-12
('ILCD 2.0 2018 midpoint', 'human health', 'carcinogenic effects')	'ATR BM, HT+LT, + CCS (VPSA), 98 (average), digestate incineration' (megajoule, CH, None)	Direct CO2 emissions	0
('ILCD 2.0 2018 midpoint', 'human health', 'carcinogenic effects')	'ATR BM, HT+LT, + CCS (VPSA), 98 (average), digestate incineration' (megajoule, CH, None)	Electricity from/to grid	3.61255e-11
('ILCD 2.0 2018 midpoint', 'human health', 'carcinogenic effects')	'ATR BM, HT+LT, + CCS (VPSA), 98 (average), digestate incineration' (megajoule, CH, None)	Emissions from fuel burning in furnace	0
('ILCD 2.0 2018 midpoint', 'human health', 'carcinogenic effects')	'ATR BM, HT+LT, + CCS (VPSA), 98 (average), digestate incineration' (megajoule, CH, None)	Fuel supply chain	3.48412e-10
('ILCD 2.0 2018 midpoint', 'human health', 'carcinogenic effects')	'ATR BM, HT+LT, + CCS (VPSA), 98 (average), digestate incineration' (megajoule, CH, None)	Plant infrastructure	7.30486e-11
('ILCD 2.0 2018 midpoint', 'human health', 'carcinogenic effects')	'ATR BM, HT+LT, + CCS (VPSA), 98 (average), digestate incineration' (megajoule, CH, None)	Water supply	9.08743e-13
('ILCD 2.0 2018 midpoint', 'human health', 'ionising radiation')	'ATR BM, HT+LT, + CCS (VPSA), 98 (average), digestate incineration' (megajoule, CH, None)	Catalysts&adsorbents	6.50284e-06
('ILCD 2.0 2018 midpoint', 'human health', 'ionising radiation')	'ATR BM, HT+LT, + CCS (VPSA), 98 (average), digestate incineration' (megajoule, CH, None)	CO2 transport and storage	0.000156136
('ILCD 2.0 2018 midpoint', 'human health', 'ionising radiation')	'ATR BM, HT+LT, + CCS (VPSA), 98 (average), digestate incineration' (megajoule, CH, None)	Direct CO2 emissions	0
('ILCD 2.0 2018 midpoint', 'human health', 'ionising radiation')	'ATR BM, HT+LT, + CCS (VPSA), 98 (average), digestate incineration' (megajoule, CH, None)	Electricity from/to grid	0.00291259
('ILCD 2.0 2018 midpoint', 'human health', 'ionising radiation')	'ATR BM, HT+LT, + CCS (VPSA), 98 (average), digestate incineration' (megajoule, CH, None)	Emissions from fuel burning in furnace	0
('ILCD 2.0 2018 midpoint', 'human health', 'ionising radiation')	'ATR BM, HT+LT, + CCS (VPSA), 98 (average), digestate incineration' (megajoule, CH, None)	Fuel supply chain	0.00207019
('ILCD 2.0 2018 midpoint', 'human health', 'ionising radiation')	'ATR BM, HT+LT, + CCS (VPSA), 98 (average), digestate incineration' (megajoule, CH, None)	Plant infrastructure	0.00010641
('ILCD 2.0 2018 midpoint', 'human health', 'ionising radiation')	'ATR BM, HT+LT, + CCS (VPSA), 98 (average), digestate incineration' (megajoule, CH, None)	Water supply	3.82122e-06
('ILCD 2.0 2018 midpoint', 'human health', 'non-carcinogenic effects')	'ATR BM, HT+LT, + CCS (VPSA), 98 (average), digestate incineration' (megajoule, CH, None)	Catalysts&adsorbents	1.68319e-10
('ILCD 2.0 2018 midpoint', 'human health', 'non-carcinogenic effects')	'ATR BM, HT+LT, + CCS (VPSA), 98 (average), digestate incineration' (megajoule, CH, None)	CO2 transport and storage	3.29749e-11
('ILCD 2.0 2018 midpoint', 'human health', 'non-carcinogenic effects')	'ATR BM, HT+LT, + CCS (VPSA), 98 (average), digestate incineration' (megajoule, CH, None)	Direct CO2 emissions	0
('ILCD 2.0 2018 midpoint', 'human health', 'non-carcinogenic effects')	'ATR BM, HT+LT, + CCS (VPSA), 98 (average), digestate incineration' (megajoule, CH, None)	Electricity from/to grid	5.23526e-10
('ILCD 2.0 2018 midpoint', 'human health', 'non-carcinogenic effects')	'ATR BM, HT+LT, + CCS (VPSA), 98 (average), digestate incineration' (megajoule, CH, None)	Emissions from fuel burning in furnace	0
('ILCD 2.0 2018 midpoint', 'human health', 'non-carcinogenic effects')	'ATR BM, HT+LT, + CCS (VPSA), 98 (average), digestate incineration' (megajoule, CH, None)	Fuel supply chain	3.22996e-09
('ILCD 2.0 2018 midpoint', 'human health', 'non-carcinogenic effects')	'ATR BM, HT+LT, + CCS (VPSA), 98 (average), digestate incineration' (megajoule, CH, None)	Plant infrastructure	5.72599e-10
('ILCD 2.0 2018 midpoint', 'human health', 'non-carcinogenic effects')	'ATR BM, HT+LT, + CCS (VPSA), 98 (average), digestate incineration' (megajoule, CH, None)	Water supply	6.85545e-12
('ILCD 2.0 2018 midpoint', 'human health', 'ozone layer depletion')	'ATR BM, HT+LT, + CCS (VPSA), 98 (average), digestate incineration' (megajoule, CH, None)	Catalysts&adsorbents	1.38511e-11
('ILCD 2.0 2018 midpoint', 'human health', 'ozone layer depletion')	'ATR BM, HT+LT, + CCS (VPSA), 98 (average), digestate incineration' (megajoule, CH, None)	CO2 transport and storage	2.53399e-11
('ILCD 2.0 2018 midpoint', 'human health', 'ozone layer depletion')	'ATR BM, HT+LT, + CCS (VPSA), 98 (average), digestate incineration' (megajoule, CH, None)	Direct CO2 emissions	0
('ILCD 2.0 2018 midpoint', 'human health', 'ozone layer depletion')	'ATR BM, HT+LT, + CCS (VPSA), 98 (average), digestate incineration' (megajoule, CH, None)	Electricity from/to grid	4.51158e-10
('ILCD 2.0 2018 midpoint', 'human health', 'ozone layer depletion')	'ATR BM, HT+LT, + CCS (VPSA), 98 (average), digestate incineration' (megajoule, CH, None)	Emissions from fuel burning in furnace	0
('ILCD 2.0 2018 midpoint', 'human health', 'ozone layer depletion')	'ATR BM, HT+LT, + CCS (VPSA), 98 (average), digestate incineration' (megajoule, CH, None)	Fuel supply chain	9.78015e-10
('ILCD 2.0 2018 midpoint', 'human health', 'ozone layer depletion')	'ATR BM, HT+LT, + CCS (VPSA), 98 (average), digestate incineration' (megajoule, CH, None)	Plant infrastructure	4.70934e-11
('ILCD 2.0 2018 midpoint', 'human health', 'ozone layer depletion')	'ATR BM, HT+LT, + CCS (VPSA), 98 (average), digestate incineration' (megajoule, CH, None)	Water supply	1.53781e-11
('ILCD 2.0 2018 midpoint', 'human health', 'photochemical ozone creation')	'ATR BM, HT+LT, + CCS (VPSA), 98 (average), digestate incineration' (megajoule, CH, None)	Catalysts&adsorbents	1.11653e-06
('ILCD 2.0 2018 midpoint', 'human health', 'photochemical ozone creation')	'ATR BM, HT+LT, + CCS (VPSA), 98 (average), digestate incineration' (megajoule, CH, None)	CO2 transport and storage	7.34787e-07
('ILCD 2.0 2018 midpoint', 'human health', 'photochemical ozone creation')	'ATR BM, HT+LT, + CCS (VPSA), 98 (average), digestate incineration' (megajoule, CH, None)	Direct CO2 emissions	0
('ILCD 2.0 2018 midpoint', 'human health', 'photochemical ozone creation')	'ATR BM, HT+LT, + CCS (VPSA), 98 (average), digestate incineration' (megajoule, CH, None)	Electricity from/to grid	1.08473e-05
('ILCD 2.0 2018 midpoint', 'human health', 'photochemical ozone creation')	'ATR BM, HT+LT, + CCS (VPSA), 98 (average), digestate incineration' (megajoule, CH, None)	Emissions from fuel burning in furnace	2.49973e-05
('ILCD 2.0 2018 midpoint', 'human health', 'photochemical ozone creation')	'ATR BM, HT+LT, + CCS (VPSA), 98 (average), digestate incineration' (megajoule, CH, None)	Fuel supply chain	3.27638e-05
('ILCD 2.0 2018 midpoint', 'human health', 'photochemical ozone creation')	'ATR BM, HT+LT, + CCS (VPSA), 98 (average), digestate incineration' (megajoule, CH, None)	Plant infrastructure	2.97279e-06
('ILCD 2.0 2018 midpoint', 'human health', 'photochemical ozone creation')	'ATR BM, HT+LT, + CCS (VPSA), 98 (average), digestate incineration' (megajoule, CH, None)	Water supply	7.74423e-08
('ILCD 2.0 2018 midpoint', 'human health', 'respiratory effects, inorganics')	'ATR BM, HT+LT, + CCS (VPSA), 98 (average), digestate incineration' (megajoule, CH, None)	Catalysts&adsorbents	1.45044e-11
('ILCD 2.0 2018 midpoint', 'human health', 'respiratory effects, inorganics')	'ATR BM, HT+LT, + CCS (VPSA), 98 (average), digestate incineration' (megajoule, CH, None)	CO2 transport and storage	5.66866e-12
('ILCD 2.0 2018 midpoint', 'human health', 'respiratory effects, inorganics')	'ATR BM, HT+LT, + CCS (VPSA), 98 (average), digestate incineration' (megajoule, CH, None)	Direct CO2 emissions	0
('ILCD 2.0 2018 midpoint', 'human health', 'respiratory effects, inorganics')	'ATR BM, HT+LT, + CCS (VPSA), 98 (average), digestate incineration' (megajoule, CH, None)	Electricity from/to grid	7.97718e-11
('ILCD 2.0 2018 midpoint', 'human health', 'respiratory effects, inorganics')	'ATR BM, HT+LT, + CCS (VPSA), 98 (average), digestate incineration' (megajoule, CH, None)	Emissions from fuel burning in furnace	3.99956e-11
('ILCD 2.0 2018 midpoint', 'human health', 'respiratory effects, inorganics')	'ATR BM, HT+LT, + CCS (VPSA), 98 (average), digestate incineration' (megajoule, CH, None)	Fuel supply chain	8.98048e-10
('ILCD 2.0 2018 midpoint', 'human health', 'respiratory effects, inorganics')	'ATR BM, HT+LT, + CCS (VPSA), 98 (average), digestate incineration' (megajoule, CH, None)	Plant infrastructure	4.70312e-11
('ILCD 2.0 2018 midpoint', 'human health', 'respiratory effects, inorganics')	'ATR BM, HT+LT, + CCS (VPSA), 98 (average), digestate incineration' (megajoule, CH, None)	Water supply	1.74322e-12
('ILCD 2.0 2018 midpoint', 'resources', 'fossils')	'ATR BM, HT+LT, + CCS (VPSA), 98 (average), digestate incineration' (megajoule, CH, None)	Catalysts&adsorbents	0.00122557
('ILCD 2.0 2018 midpoint', 'resources', 'fossils')	'ATR BM, HT+LT, + CCS (VPSA), 98 (average), digestate incineration' (megajoule, CH, None)	CO2 transport and storage	0.00675226
('ILCD 2.0 2018 midpoint', 'resources', 'fossils')	'ATR BM, HT+LT, + CCS (VPSA), 98 (average), digestate incineration' (megajoule, CH, None)	Direct CO2 emissions	0
('ILCD 2.0 2018 midpoint', 'resources', 'fossils')	'ATR BM, HT+LT, + CCS (VPSA), 98 (average), digestate incineration' (megajoule, CH, None)	Electricity from/to grid	0.122681
('ILCD 2.0 2018 midpoint', 'resources', 'fossils')	'ATR BM, HT+LT, + CCS (VPSA), 98 (average), digestate incineration' (megajoule, CH, None)	Emissions from fuel burning in furnace	0
('ILCD 2.0 2018 midpoint', 'resources', 'fossils')	'ATR BM, HT+LT, + CCS (VPSA), 98 (average), digestate incineration' (megajoule, CH, None)	Fuel supply chain	0.1591
('ILCD 2.0 2018 midpoint', 'resources', 'fossils')	'ATR BM, HT+LT, + CCS (VPSA), 98 (average), digestate incineration' (megajoule, CH, None)	Plant infrastructure	0.009569
('ILCD 2.0 2018 midpoint', 'resources', 'fossils')	'ATR BM, HT+LT, + CCS (VPSA), 98 (average), digestate incineration' (megajoule, CH, None)	Water supply	0.000352253
('ILCD 2.0 2018 midpoint', 'resources', 'land use')	'ATR BM, HT+LT, + CCS (VPSA), 98 (average), digestate incineration' (megajoule, CH, None)	Catalysts&adsorbents	0.00112991
('ILCD 2.0 2018 midpoint', 'resources', 'land use')	'ATR BM, HT+LT, + CCS (VPSA), 98 (average), digestate incineration' (megajoule, CH, None)	CO2 transport and storage	0.00276696
('ILCD 2.0 2018 midpoint', 'resources', 'land use')	'ATR BM, HT+LT, + CCS (VPSA), 98 (average), digestate incineration' (megajoule, CH, None)	Direct CO2 emissions	0
('ILCD 2.0 2018 midpoint', 'resources', 'land use')	'ATR BM, HT+LT, + CCS (VPSA), 98 (average), digestate incineration' (megajoule, CH, None)	Electricity from/to grid	0.0539157
('ILCD 2.0 2018 midpoint', 'resources', 'land use')	'ATR BM, HT+LT, + CCS (VPSA), 98 (average), digestate incineration' (megajoule, CH, None)	Emissions from fuel burning in furnace	0
('ILCD 2.0 2018 midpoint', 'resources', 'land use')	'ATR BM, HT+LT, + CCS (VPSA), 98 (average), digestate incineration' (megajoule, CH, None)	Fuel supply chain	0.141476
('ILCD 2.0 2018 midpoint', 'resources', 'land use')	'ATR BM, HT+LT, + CCS (VPSA), 98 (average), digestate incineration' (megajoule, CH, None)	Plant infrastructure	0.0215587
('ILCD 2.0 2018 midpoint', 'resources', 'land use')	'ATR BM, HT+LT, + CCS (VPSA), 98 (average), digestate incineration' (megajoule, CH, None)	Water supply	0.000178245
('ILCD 2.0 2018 midpoint', 'resources', 'minerals and metals')	'ATR BM, HT+LT, + CCS (VPSA), 98 (average), digestate incineration' (megajoule, CH, None)	Catalysts&adsorbents	1.55187e-08
('ILCD 2.0 2018 midpoint', 'resources', 'minerals and metals')	'ATR BM, HT+LT, + CCS (VPSA), 98 (average), digestate incineration' (megajoule, CH, None)	CO2 transport and storage	9.09055e-10
('ILCD 2.0 2018 midpoint', 'resources', 'minerals and metals')	'ATR BM, HT+LT, + CCS (VPSA), 98 (average), digestate incineration' (megajoule, CH, None)	Direct CO2 emissions	0
('ILCD 2.0 2018 midpoint', 'resources', 'minerals and metals')	'ATR BM, HT+LT, + CCS (VPSA), 98 (average), digestate incineration' (megajoule, CH, None)	Electricity from/to grid	1.22434e-08
('ILCD 2.0 2018 midpoint', 'resources', 'minerals and metals')	'ATR BM, HT+LT, + CCS (VPSA), 98 (average), digestate incineration' (megajoule, CH, None)	Emissions from fuel burning in furnace	0
('ILCD 2.0 2018 midpoint', 'resources', 'minerals and metals')	'ATR BM, HT+LT, + CCS (VPSA), 98 (average), digestate incineration' (megajoule, CH, None)	Fuel supply chain	1.25277e-06
('ILCD 2.0 2018 midpoint', 'resources', 'minerals and metals')	'ATR BM, HT+LT, + CCS (VPSA), 98 (average), digestate incineration' (megajoule, CH, None)	Plant infrastructure	1.81182e-07
('ILCD 2.0 2018 midpoint', 'resources', 'minerals and metals')	'ATR BM, HT+LT, + CCS (VPSA), 98 (average), digestate incineration' (megajoule, CH, None)	Water supply	6.76656e-10
('ReCiPe Midpoint (H) V1.13', 'metal depletion', 'MDP')	'ATR BM, HT+LT, + CCS (VPSA), 98 (average), digestate incineration' (megajoule, CH, None)	Catalysts&adsorbents	0.00028327
('ReCiPe Midpoint (H) V1.13', 'metal depletion', 'MDP')	'ATR BM, HT+LT, + CCS (VPSA), 98 (average), digestate incineration' (megajoule, CH, None)	CO2 transport and storage	4.00261e-06
('ReCiPe Midpoint (H) V1.13', 'metal depletion', 'MDP')	'ATR BM, HT+LT, + CCS (VPSA), 98 (average), digestate incineration' (megajoule, CH, None)	Direct CO2 emissions	0
('ReCiPe Midpoint (H) V1.13', 'metal depletion', 'MDP')	'ATR BM, HT+LT, + CCS (VPSA), 98 (average), digestate incineration' (megajoule, CH, None)	Electricity from/to grid	4.39732e-05
('ReCiPe Midpoint (H) V1.13', 'metal depletion', 'MDP')	'ATR BM, HT+LT, + CCS (VPSA), 98 (average), digestate incineration' (megajoule, CH, None)	Emissions from fuel burning in furnace	0
('ReCiPe Midpoint (H) V1.13', 'metal depletion', 'MDP')	'ATR BM, HT+LT, + CCS (VPSA), 98 (average), digestate incineration' (megajoule, CH, None)	Fuel supply chain	0.00319958
('ReCiPe Midpoint (H) V1.13', 'metal depletion', 'MDP')	'ATR BM, HT+LT, + CCS (VPSA), 98 (average), digestate incineration' (megajoule, CH, None)	Plant infrastructure	0.000575172
('ReCiPe Midpoint (H) V1.13', 'metal depletion', 'MDP')	'ATR BM, HT+LT, + CCS (VPSA), 98 (average), digestate incineration' (megajoule, CH, None)	Water supply	2.07627e-06
('cumulative energy demand', 'fossil', 'non-renewable energy resources, fossil')	'ATR BM, HT+LT, + CCS (MDEA), 90 (average)' (megajoule, CH, None)	Catalysts&adsorbents	0.00104087
('cumulative energy demand', 'fossil', 'non-renewable energy resources, fossil')	'ATR BM, HT+LT, + CCS (MDEA), 90 (average)' (megajoule, CH, None)	CO2 transport and storage	0.00319407
('cumulative energy demand', 'fossil', 'non-renewable energy resources, fossil')	'ATR BM, HT+LT, + CCS (MDEA), 90 (average)' (megajoule, CH, None)	Direct CO2 emissions	0
('cumulative energy demand', 'fossil', 'non-renewable energy resources, fossil')	'ATR BM, HT+LT, + CCS (MDEA), 90 (average)' (megajoule, CH, None)	Electricity from/to grid	0.0414881
('cumulative energy demand', 'fossil', 'non-renewable energy resources, fossil')	'ATR BM, HT+LT, + CCS (MDEA), 90 (average)' (megajoule, CH, None)	Emissions from fuel burning in furnace	0
('cumulative energy demand', 'fossil', 'non-renewable energy resources, fossil')	'ATR BM, HT+LT, + CCS (MDEA), 90 (average)' (megajoule, CH, None)	Fuel supply chain	0.116946
('cumulative energy demand', 'fossil', 'non-renewable energy resources, fossil')	'ATR BM, HT+LT, + CCS (MDEA), 90 (average)' (megajoule, CH, None)	Plant infrastructure	0.00693806
('cumulative energy demand', 'fossil', 'non-renewable energy resources, fossil')	'ATR BM, HT+LT, + CCS (MDEA), 90 (average)' (megajoule, CH, None)	Water supply	0.000277399
('cumulative energy demand', 'nuclear', 'non-renewable energy resources, nuclear')	'ATR BM, HT+LT, + CCS (MDEA), 90 (average)' (megajoule, CH, None)	Catalysts&adsorbents	8.69457e-05
('cumulative energy demand', 'nuclear', 'non-renewable energy resources, nuclear')	'ATR BM, HT+LT, + CCS (MDEA), 90 (average)' (megajoule, CH, None)	CO2 transport and storage	0.0024166
('cumulative energy demand', 'nuclear', 'non-renewable energy resources, nuclear')	'ATR BM, HT+LT, + CCS (MDEA), 90 (average)' (megajoule, CH, None)	Direct CO2 emissions	0
('cumulative energy demand', 'nuclear', 'non-renewable energy resources, nuclear')	'ATR BM, HT+LT, + CCS (MDEA), 90 (average)' (megajoule, CH, None)	Electricity from/to grid	0.0327377
('cumulative energy demand', 'nuclear', 'non-renewable energy resources, nuclear')	'ATR BM, HT+LT, + CCS (MDEA), 90 (average)' (megajoule, CH, None)	Emissions from fuel burning in furnace	0
('cumulative energy demand', 'nuclear', 'non-renewable energy resources, nuclear')	'ATR BM, HT+LT, + CCS (MDEA), 90 (average)' (megajoule, CH, None)	Fuel supply chain	0.0311952
('cumulative energy demand', 'nuclear', 'non-renewable energy resources, nuclear')	'ATR BM, HT+LT, + CCS (MDEA), 90 (average)' (megajoule, CH, None)	Plant infrastructure	0.00171998
('cumulative energy demand', 'nuclear', 'non-renewable energy resources, nuclear')	'ATR BM, HT+LT, + CCS (MDEA), 90 (average)' (megajoule, CH, None)	Water supply	5.86471e-05
('cumulative energy demand', 'primary forest', 'non-renewable energy resources, primary forest')	'ATR BM, HT+LT, + CCS (MDEA), 90 (average)' (megajoule, CH, None)	Catalysts&adsorbents	2.14448e-08
('cumulative energy demand', 'primary forest', 'non-renewable energy resources, primary forest')	'ATR BM, HT+LT, + CCS (MDEA), 90 (average)' (megajoule, CH, None)	CO2 transport and storage	4.70246e-08
('cumulative energy demand', 'primary forest', 'non-renewable energy resources, primary forest')	'ATR BM, HT+LT, + CCS (MDEA), 90 (average)' (megajoule, CH, None)	Direct CO2 emissions	0
('cumulative energy demand', 'primary forest', 'non-renewable energy resources, primary forest')	'ATR BM, HT+LT, + CCS (MDEA), 90 (average)' (megajoule, CH, None)	Electricity from/to grid	2.88733e-07
('cumulative energy demand', 'primary forest', 'non-renewable energy resources, primary forest')	'ATR BM, HT+LT, + CCS (MDEA), 90 (average)' (megajoule, CH, None)	Emissions from fuel burning in furnace	0
('cumulative energy demand', 'primary forest', 'non-renewable energy resources, primary forest')	'ATR BM, HT+LT, + CCS (MDEA), 90 (average)' (megajoule, CH, None)	Fuel supply chain	2.08208e-06
('cumulative energy demand', 'primary forest', 'non-renewable energy resources, primary forest')	'ATR BM, HT+LT, + CCS (MDEA), 90 (average)' (megajoule, CH, None)	Plant infrastructure	3.70972e-07
('cumulative energy demand', 'primary forest', 'non-renewable energy resources, primary forest')	'ATR BM, HT+LT, + CCS (MDEA), 90 (average)' (megajoule, CH, None)	Water supply	4.68063e-09
('ILCD 2.0 2018 midpoint', 'climate change', 'climate change total')	'ATR BM, HT+LT, + CCS (MDEA), 90 (average)' (megajoule, CH, None)	Catalysts&adsorbents	9.12173e-05
('ILCD 2.0 2018 midpoint', 'climate change', 'climate change total')	'ATR BM, HT+LT, + CCS (MDEA), 90 (average)' (megajoule, CH, None)	CO2 transport and storage	0.00026306
('ILCD 2.0 2018 midpoint', 'climate change', 'climate change total')	'ATR BM, HT+LT, + CCS (MDEA), 90 (average)' (megajoule, CH, None)	Direct CO2 emissions	0.0103782
('ILCD 2.0 2018 midpoint', 'climate change', 'climate change total')	'ATR BM, HT+LT, + CCS (MDEA), 90 (average)' (megajoule, CH, None)	Electricity from/to grid	0.00343495
('ILCD 2.0 2018 midpoint', 'climate change', 'climate change total')	'ATR BM, HT+LT, + CCS (MDEA), 90 (average)' (megajoule, CH, None)	Emissions from fuel burning in furnace	0
('ILCD 2.0 2018 midpoint', 'climate change', 'climate change total')	'ATR BM, HT+LT, + CCS (MDEA), 90 (average)' (megajoule, CH, None)	Fuel supply chain	-0.100381
('ILCD 2.0 2018 midpoint', 'climate change', 'climate change total')	'ATR BM, HT+LT, + CCS (MDEA), 90 (average)' (megajoule, CH, None)	Plant infrastructure	0.000631279
('ILCD 2.0 2018 midpoint', 'climate change', 'climate change total')	'ATR BM, HT+LT, + CCS (MDEA), 90 (average)' (megajoule, CH, None)	Water supply	2.27993e-05
('ILCD 2.0 2018 midpoint', 'ecosystem quality', 'freshwater and terrestrial acidification')	'ATR BM, HT+LT, + CCS (MDEA), 90 (average)' (megajoule, CH, None)	Catalysts&adsorbents	7.85337e-06
('ILCD 2.0 2018 midpoint', 'ecosystem quality', 'freshwater and terrestrial acidification')	'ATR BM, HT+LT, + CCS (MDEA), 90 (average)' (megajoule, CH, None)	CO2 transport and storage	1.47269e-06
('ILCD 2.0 2018 midpoint', 'ecosystem quality', 'freshwater and terrestrial acidification')	'ATR BM, HT+LT, + CCS (MDEA), 90 (average)' (megajoule, CH, None)	Direct CO2 emissions	0
('ILCD 2.0 2018 midpoint', 'ecosystem quality', 'freshwater and terrestrial acidification')	'ATR BM, HT+LT, + CCS (MDEA), 90 (average)' (megajoule, CH, None)	Electricity from/to grid	1.77705e-05
('ILCD 2.0 2018 midpoint', 'ecosystem quality', 'freshwater and terrestrial acidification')	'ATR BM, HT+LT, + CCS (MDEA), 90 (average)' (megajoule, CH, None)	Emissions from fuel burning in furnace	1.8498e-05
('ILCD 2.0 2018 midpoint', 'ecosystem quality', 'freshwater and terrestrial acidification')	'ATR BM, HT+LT, + CCS (MDEA), 90 (average)' (megajoule, CH, None)	Fuel supply chain	0.000125075
('ILCD 2.0 2018 midpoint', 'ecosystem quality', 'freshwater and terrestrial acidification')	'ATR BM, HT+LT, + CCS (MDEA), 90 (average)' (megajoule, CH, None)	Plant infrastructure	7.89891e-06
('ILCD 2.0 2018 midpoint', 'ecosystem quality', 'freshwater and terrestrial acidification')	'ATR BM, HT+LT, + CCS (MDEA), 90 (average)' (megajoule, CH, None)	Water supply	2.47425e-07
('ILCD 2.0 2018 midpoint', 'ecosystem quality', 'freshwater ecotoxicity')	'ATR BM, HT+LT, + CCS (MDEA), 90 (average)' (megajoule, CH, None)	Catalysts&adsorbents	0.000628182
('ILCD 2.0 2018 midpoint', 'ecosystem quality', 'freshwater ecotoxicity')	'ATR BM, HT+LT, + CCS (MDEA), 90 (average)' (megajoule, CH, None)	CO2 transport and storage	8.90568e-05
('ILCD 2.0 2018 midpoint', 'ecosystem quality', 'freshwater ecotoxicity')	'ATR BM, HT+LT, + CCS (MDEA), 90 (average)' (megajoule, CH, None)	Direct CO2 emissions	0
('ILCD 2.0 2018 midpoint', 'ecosystem quality', 'freshwater ecotoxicity')	'ATR BM, HT+LT, + CCS (MDEA), 90 (average)' (megajoule, CH, None)	Electricity from/to grid	0.000865053
('ILCD 2.0 2018 midpoint', 'ecosystem quality', 'freshwater ecotoxicity')	'ATR BM, HT+LT, + CCS (MDEA), 90 (average)' (megajoule, CH, None)	Emissions from fuel burning in furnace	0
('ILCD 2.0 2018 midpoint', 'ecosystem quality', 'freshwater ecotoxicity')	'ATR BM, HT+LT, + CCS (MDEA), 90 (average)' (megajoule, CH, None)	Fuel supply chain	0.0123108
('ILCD 2.0 2018 midpoint', 'ecosystem quality', 'freshwater ecotoxicity')	'ATR BM, HT+LT, + CCS (MDEA), 90 (average)' (megajoule, CH, None)	Plant infrastructure	0.00217871
('ILCD 2.0 2018 midpoint', 'ecosystem quality', 'freshwater ecotoxicity')	'ATR BM, HT+LT, + CCS (MDEA), 90 (average)' (megajoule, CH, None)	Water supply	3.76329e-05
('ILCD 2.0 2018 midpoint', 'ecosystem quality', 'marine eutrophication')	'ATR BM, HT+LT, + CCS (MDEA), 90 (average)' (megajoule, CH, None)	Catalysts&adsorbents	2.43506e-07
('ILCD 2.0 2018 midpoint', 'ecosystem quality', 'marine eutrophication')	'ATR BM, HT+LT, + CCS (MDEA), 90 (average)' (megajoule, CH, None)	CO2 transport and storage	2.67872e-07
('ILCD 2.0 2018 midpoint', 'ecosystem quality', 'marine eutrophication')	'ATR BM, HT+LT, + CCS (MDEA), 90 (average)' (megajoule, CH, None)	Direct CO2 emissions	0
('ILCD 2.0 2018 midpoint', 'ecosystem quality', 'marine eutrophication')	'ATR BM, HT+LT, + CCS (MDEA), 90 (average)' (megajoule, CH, None)	Electricity from/to grid	3.07095e-06
('ILCD 2.0 2018 midpoint', 'ecosystem quality', 'marine eutrophication')	'ATR BM, HT+LT, + CCS (MDEA), 90 (average)' (megajoule, CH, None)	Emissions from fuel burning in furnace	9.72394e-06
('ILCD 2.0 2018 midpoint', 'ecosystem quality', 'marine eutrophication')	'ATR BM, HT+LT, + CCS (MDEA), 90 (average)' (megajoule, CH, None)	Fuel supply chain	1.03927e-05
('ILCD 2.0 2018 midpoint', 'ecosystem quality', 'marine eutrophication')	'ATR BM, HT+LT, + CCS (MDEA), 90 (average)' (megajoule, CH, None)	Plant infrastructure	8.8364e-07
('ILCD 2.0 2018 midpoint', 'ecosystem quality', 'marine eutrophication')	'ATR BM, HT+LT, + CCS (MDEA), 90 (average)' (megajoule, CH, None)	Water supply	2.40939e-08
('ILCD 2.0 2018 midpoint', 'ecosystem quality', 'terrestrial eutrophication')	'ATR BM, HT+LT, + CCS (MDEA), 90 (average)' (megajoule, CH, None)	Catalysts&adsorbents	3.26269e-06
('ILCD 2.0 2018 midpoint', 'ecosystem quality', 'terrestrial eutrophication')	'ATR BM, HT+LT, + CCS (MDEA), 90 (average)' (megajoule, CH, None)	CO2 transport and storage	2.56377e-06
('ILCD 2.0 2018 midpoint', 'ecosystem quality', 'terrestrial eutrophication')	'ATR BM, HT+LT, + CCS (MDEA), 90 (average)' (megajoule, CH, None)	Direct CO2 emissions	0
('ILCD 2.0 2018 midpoint', 'ecosystem quality', 'terrestrial eutrophication')	'ATR BM, HT+LT, + CCS (MDEA), 90 (average)' (megajoule, CH, None)	Electricity from/to grid	2.85126e-05
('ILCD 2.0 2018 midpoint', 'ecosystem quality', 'terrestrial eutrophication')	'ATR BM, HT+LT, + CCS (MDEA), 90 (average)' (megajoule, CH, None)	Emissions from fuel burning in furnace	0.000106488
('ILCD 2.0 2018 midpoint', 'ecosystem quality', 'terrestrial eutrophication')	'ATR BM, HT+LT, + CCS (MDEA), 90 (average)' (megajoule, CH, None)	Fuel supply chain	0.000183954
('ILCD 2.0 2018 midpoint', 'ecosystem quality', 'terrestrial eutrophication')	'ATR BM, HT+LT, + CCS (MDEA), 90 (average)' (megajoule, CH, None)	Plant infrastructure	1.03808e-05
('ILCD 2.0 2018 midpoint', 'ecosystem quality', 'terrestrial eutrophication')	'ATR BM, HT+LT, + CCS (MDEA), 90 (average)' (megajoule, CH, None)	Water supply	2.44598e-07
('ILCD 2.0 2018 midpoint', 'human health', 'carcinogenic effects')	'ATR BM, HT+LT, + CCS (MDEA), 90 (average)' (megajoule, CH, None)	Catalysts&adsorbents	2.32399e-11
('ILCD 2.0 2018 midpoint', 'human health', 'carcinogenic effects')	'ATR BM, HT+LT, + CCS (MDEA), 90 (average)' (megajoule, CH, None)	CO2 transport and storage	3.39028e-12
('ILCD 2.0 2018 midpoint', 'human health', 'carcinogenic effects')	'ATR BM, HT+LT, + CCS (MDEA), 90 (average)' (megajoule, CH, None)	Direct CO2 emissions	0
('ILCD 2.0 2018 midpoint', 'human health', 'carcinogenic effects')	'ATR BM, HT+LT, + CCS (MDEA), 90 (average)' (megajoule, CH, None)	Electricity from/to grid	2.35489e-11
('ILCD 2.0 2018 midpoint', 'human health', 'carcinogenic effects')	'ATR BM, HT+LT, + CCS (MDEA), 90 (average)' (megajoule, CH, None)	Emissions from fuel burning in furnace	0
('ILCD 2.0 2018 midpoint', 'human health', 'carcinogenic effects')	'ATR BM, HT+LT, + CCS (MDEA), 90 (average)' (megajoule, CH, None)	Fuel supply chain	3.46697e-10
('ILCD 2.0 2018 midpoint', 'human health', 'carcinogenic effects')	'ATR BM, HT+LT, + CCS (MDEA), 90 (average)' (megajoule, CH, None)	Plant infrastructure	7.30488e-11
('ILCD 2.0 2018 midpoint', 'human health', 'carcinogenic effects')	'ATR BM, HT+LT, + CCS (MDEA), 90 (average)' (megajoule, CH, None)	Water supply	9.08745e-13
('ILCD 2.0 2018 midpoint', 'human health', 'ionising radiation')	'ATR BM, HT+LT, + CCS (MDEA), 90 (average)' (megajoule, CH, None)	Catalysts&adsorbents	6.50284e-06
('ILCD 2.0 2018 midpoint', 'human health', 'ionising radiation')	'ATR BM, HT+LT, + CCS (MDEA), 90 (average)' (megajoule, CH, None)	CO2 transport and storage	0.000139917
('ILCD 2.0 2018 midpoint', 'human health', 'ionising radiation')	'ATR BM, HT+LT, + CCS (MDEA), 90 (average)' (megajoule, CH, None)	Direct CO2 emissions	0
('ILCD 2.0 2018 midpoint', 'human health', 'ionising radiation')	'ATR BM, HT+LT, + CCS (MDEA), 90 (average)' (megajoule, CH, None)	Electricity from/to grid	0.00189861
('ILCD 2.0 2018 midpoint', 'human health', 'ionising radiation')	'ATR BM, HT+LT, + CCS (MDEA), 90 (average)' (megajoule, CH, None)	Emissions from fuel burning in furnace	0
('ILCD 2.0 2018 midpoint', 'human health', 'ionising radiation')	'ATR BM, HT+LT, + CCS (MDEA), 90 (average)' (megajoule, CH, None)	Fuel supply chain	0.00206
('ILCD 2.0 2018 midpoint', 'human health', 'ionising radiation')	'ATR BM, HT+LT, + CCS (MDEA), 90 (average)' (megajoule, CH, None)	Plant infrastructure	0.000106411
('ILCD 2.0 2018 midpoint', 'human health', 'ionising radiation')	'ATR BM, HT+LT, + CCS (MDEA), 90 (average)' (megajoule, CH, None)	Water supply	3.82124e-06
('ILCD 2.0 2018 midpoint', 'human health', 'non-carcinogenic effects')	'ATR BM, HT+LT, + CCS (MDEA), 90 (average)' (megajoule, CH, None)	Catalysts&adsorbents	1.68319e-10
('ILCD 2.0 2018 midpoint', 'human health', 'non-carcinogenic effects')	'ATR BM, HT+LT, + CCS (MDEA), 90 (average)' (megajoule, CH, None)	CO2 transport and storage	2.95495e-11
('ILCD 2.0 2018 midpoint', 'human health', 'non-carcinogenic effects')	'ATR BM, HT+LT, + CCS (MDEA), 90 (average)' (megajoule, CH, None)	Direct CO2 emissions	0
('ILCD 2.0 2018 midpoint', 'human health', 'non-carcinogenic effects')	'ATR BM, HT+LT, + CCS (MDEA), 90 (average)' (megajoule, CH, None)	Electricity from/to grid	3.41268e-10
('ILCD 2.0 2018 midpoint', 'human health', 'non-carcinogenic effects')	'ATR BM, HT+LT, + CCS (MDEA), 90 (average)' (megajoule, CH, None)	Emissions from fuel burning in furnace	0
('ILCD 2.0 2018 midpoint', 'human health', 'non-carcinogenic effects')	'ATR BM, HT+LT, + CCS (MDEA), 90 (average)' (megajoule, CH, None)	Fuel supply chain	3.21407e-09
('ILCD 2.0 2018 midpoint', 'human health', 'non-carcinogenic effects')	'ATR BM, HT+LT, + CCS (MDEA), 90 (average)' (megajoule, CH, None)	Plant infrastructure	5.72601e-10
('ILCD 2.0 2018 midpoint', 'human health', 'non-carcinogenic effects')	'ATR BM, HT+LT, + CCS (MDEA), 90 (average)' (megajoule, CH, None)	Water supply	6.85547e-12
('ILCD 2.0 2018 midpoint', 'human health', 'ozone layer depletion')	'ATR BM, HT+LT, + CCS (MDEA), 90 (average)' (megajoule, CH, None)	Catalysts&adsorbents	1.38511e-11
('ILCD 2.0 2018 midpoint', 'human health', 'ozone layer depletion')	'ATR BM, HT+LT, + CCS (MDEA), 90 (average)' (megajoule, CH, None)	CO2 transport and storage	2.27076e-11
('ILCD 2.0 2018 midpoint', 'human health', 'ozone layer depletion')	'ATR BM, HT+LT, + CCS (MDEA), 90 (average)' (megajoule, CH, None)	Direct CO2 emissions	0
('ILCD 2.0 2018 midpoint', 'human health', 'ozone layer depletion')	'ATR BM, HT+LT, + CCS (MDEA), 90 (average)' (megajoule, CH, None)	Electricity from/to grid	2.94094e-10
('ILCD 2.0 2018 midpoint', 'human health', 'ozone layer depletion')	'ATR BM, HT+LT, + CCS (MDEA), 90 (average)' (megajoule, CH, None)	Emissions from fuel burning in furnace	0
('ILCD 2.0 2018 midpoint', 'human health', 'ozone layer depletion')	'ATR BM, HT+LT, + CCS (MDEA), 90 (average)' (megajoule, CH, None)	Fuel supply chain	9.73203e-10
('ILCD 2.0 2018 midpoint', 'human health', 'ozone layer depletion')	'ATR BM, HT+LT, + CCS (MDEA), 90 (average)' (megajoule, CH, None)	Plant infrastructure	4.70935e-11
('ILCD 2.0 2018 midpoint', 'human health', 'ozone layer depletion')	'ATR BM, HT+LT, + CCS (MDEA), 90 (average)' (megajoule, CH, None)	Water supply	1.53782e-11
('ILCD 2.0 2018 midpoint', 'human health', 'photochemical ozone creation')	'ATR BM, HT+LT, + CCS (MDEA), 90 (average)' (megajoule, CH, None)	Catalysts&adsorbents	1.11653e-06
('ILCD 2.0 2018 midpoint', 'human health', 'photochemical ozone creation')	'ATR BM, HT+LT, + CCS (MDEA), 90 (average)' (megajoule, CH, None)	CO2 transport and storage	6.58458e-07
('ILCD 2.0 2018 midpoint', 'human health', 'photochemical ozone creation')	'ATR BM, HT+LT, + CCS (MDEA), 90 (average)' (megajoule, CH, None)	Direct CO2 emissions	0
('ILCD 2.0 2018 midpoint', 'human health', 'photochemical ozone creation')	'ATR BM, HT+LT, + CCS (MDEA), 90 (average)' (megajoule, CH, None)	Electricity from/to grid	7.07099e-06
('ILCD 2.0 2018 midpoint', 'human health', 'photochemical ozone creation')	'ATR BM, HT+LT, + CCS (MDEA), 90 (average)' (megajoule, CH, None)	Emissions from fuel burning in furnace	2.49973e-05
('ILCD 2.0 2018 midpoint', 'human health', 'photochemical ozone creation')	'ATR BM, HT+LT, + CCS (MDEA), 90 (average)' (megajoule, CH, None)	Fuel supply chain	3.26026e-05
('ILCD 2.0 2018 midpoint', 'human health', 'photochemical ozone creation')	'ATR BM, HT+LT, + CCS (MDEA), 90 (average)' (megajoule, CH, None)	Plant infrastructure	2.97279e-06
('ILCD 2.0 2018 midpoint', 'human health', 'photochemical ozone creation')	'ATR BM, HT+LT, + CCS (MDEA), 90 (average)' (megajoule, CH, None)	Water supply	7.74425e-08
('ILCD 2.0 2018 midpoint', 'human health', 'respiratory effects, inorganics')	'ATR BM, HT+LT, + CCS (MDEA), 90 (average)' (megajoule, CH, None)	Catalysts&adsorbents	1.45044e-11
('ILCD 2.0 2018 midpoint', 'human health', 'respiratory effects, inorganics')	'ATR BM, HT+LT, + CCS (MDEA), 90 (average)' (megajoule, CH, None)	CO2 transport and storage	5.07981e-12
('ILCD 2.0 2018 midpoint', 'human health', 'respiratory effects, inorganics')	'ATR BM, HT+LT, + CCS (MDEA), 90 (average)' (megajoule, CH, None)	Direct CO2 emissions	0
('ILCD 2.0 2018 midpoint', 'human health', 'respiratory effects, inorganics')	'ATR BM, HT+LT, + CCS (MDEA), 90 (average)' (megajoule, CH, None)	Electricity from/to grid	5.20003e-11
('ILCD 2.0 2018 midpoint', 'human health', 'respiratory effects, inorganics')	'ATR BM, HT+LT, + CCS (MDEA), 90 (average)' (megajoule, CH, None)	Emissions from fuel burning in furnace	3.99956e-11
('ILCD 2.0 2018 midpoint', 'human health', 'respiratory effects, inorganics')	'ATR BM, HT+LT, + CCS (MDEA), 90 (average)' (megajoule, CH, None)	Fuel supply chain	8.9363e-10
('ILCD 2.0 2018 midpoint', 'human health', 'respiratory effects, inorganics')	'ATR BM, HT+LT, + CCS (MDEA), 90 (average)' (megajoule, CH, None)	Plant infrastructure	4.70314e-11
('ILCD 2.0 2018 midpoint', 'human health', 'respiratory effects, inorganics')	'ATR BM, HT+LT, + CCS (MDEA), 90 (average)' (megajoule, CH, None)	Water supply	1.74323e-12
('ILCD 2.0 2018 midpoint', 'resources', 'fossils')	'ATR BM, HT+LT, + CCS (MDEA), 90 (average)' (megajoule, CH, None)	Catalysts&adsorbents	0.00122557
('ILCD 2.0 2018 midpoint', 'resources', 'fossils')	'ATR BM, HT+LT, + CCS (MDEA), 90 (average)' (megajoule, CH, None)	CO2 transport and storage	0.00605085
('ILCD 2.0 2018 midpoint', 'resources', 'fossils')	'ATR BM, HT+LT, + CCS (MDEA), 90 (average)' (megajoule, CH, None)	Direct CO2 emissions	0
('ILCD 2.0 2018 midpoint', 'resources', 'fossils')	'ATR BM, HT+LT, + CCS (MDEA), 90 (average)' (megajoule, CH, None)	Electricity from/to grid	0.0799714
('ILCD 2.0 2018 midpoint', 'resources', 'fossils')	'ATR BM, HT+LT, + CCS (MDEA), 90 (average)' (megajoule, CH, None)	Emissions from fuel burning in furnace	0
('ILCD 2.0 2018 midpoint', 'resources', 'fossils')	'ATR BM, HT+LT, + CCS (MDEA), 90 (average)' (megajoule, CH, None)	Fuel supply chain	0.158317
('ILCD 2.0 2018 midpoint', 'resources', 'fossils')	'ATR BM, HT+LT, + CCS (MDEA), 90 (average)' (megajoule, CH, None)	Plant infrastructure	0.00956902
('ILCD 2.0 2018 midpoint', 'resources', 'fossils')	'ATR BM, HT+LT, + CCS (MDEA), 90 (average)' (megajoule, CH, None)	Water supply	0.000352254
('ILCD 2.0 2018 midpoint', 'resources', 'land use')	'ATR BM, HT+LT, + CCS (MDEA), 90 (average)' (megajoule, CH, None)	Catalysts&adsorbents	0.00112991
('ILCD 2.0 2018 midpoint', 'resources', 'land use')	'ATR BM, HT+LT, + CCS (MDEA), 90 (average)' (megajoule, CH, None)	CO2 transport and storage	0.00247954
('ILCD 2.0 2018 midpoint', 'resources', 'land use')	'ATR BM, HT+LT, + CCS (MDEA), 90 (average)' (megajoule, CH, None)	Direct CO2 emissions	0
('ILCD 2.0 2018 midpoint', 'resources', 'land use')	'ATR BM, HT+LT, + CCS (MDEA), 90 (average)' (megajoule, CH, None)	Electricity from/to grid	0.0351457
('ILCD 2.0 2018 midpoint', 'resources', 'land use')	'ATR BM, HT+LT, + CCS (MDEA), 90 (average)' (megajoule, CH, None)	Emissions from fuel burning in furnace	0
('ILCD 2.0 2018 midpoint', 'resources', 'land use')	'ATR BM, HT+LT, + CCS (MDEA), 90 (average)' (megajoule, CH, None)	Fuel supply chain	0.14078
('ILCD 2.0 2018 midpoint', 'resources', 'land use')	'ATR BM, HT+LT, + CCS (MDEA), 90 (average)' (megajoule, CH, None)	Plant infrastructure	0.0215588
('ILCD 2.0 2018 midpoint', 'resources', 'land use')	'ATR BM, HT+LT, + CCS (MDEA), 90 (average)' (megajoule, CH, None)	Water supply	0.000178245
('ILCD 2.0 2018 midpoint', 'resources', 'minerals and metals')	'ATR BM, HT+LT, + CCS (MDEA), 90 (average)' (megajoule, CH, None)	Catalysts&adsorbents	1.55187e-08
('ILCD 2.0 2018 midpoint', 'resources', 'minerals and metals')	'ATR BM, HT+LT, + CCS (MDEA), 90 (average)' (megajoule, CH, None)	CO2 transport and storage	8.14624e-10
('ILCD 2.0 2018 midpoint', 'resources', 'minerals and metals')	'ATR BM, HT+LT, + CCS (MDEA), 90 (average)' (megajoule, CH, None)	Direct CO2 emissions	0
('ILCD 2.0 2018 midpoint', 'resources', 'minerals and metals')	'ATR BM, HT+LT, + CCS (MDEA), 90 (average)' (megajoule, CH, None)	Electricity from/to grid	7.98105e-09
('ILCD 2.0 2018 midpoint', 'resources', 'minerals and metals')	'ATR BM, HT+LT, + CCS (MDEA), 90 (average)' (megajoule, CH, None)	Emissions from fuel burning in furnace	0
('ILCD 2.0 2018 midpoint', 'resources', 'minerals and metals')	'ATR BM, HT+LT, + CCS (MDEA), 90 (average)' (megajoule, CH, None)	Fuel supply chain	1.24661e-06
('ILCD 2.0 2018 midpoint', 'resources', 'minerals and metals')	'ATR BM, HT+LT, + CCS (MDEA), 90 (average)' (megajoule, CH, None)	Plant infrastructure	1.81183e-07
('ILCD 2.0 2018 midpoint', 'resources', 'minerals and metals')	'ATR BM, HT+LT, + CCS (MDEA), 90 (average)' (megajoule, CH, None)	Water supply	6.76658e-10
('ReCiPe Midpoint (H) V1.13', 'metal depletion', 'MDP')	'ATR BM, HT+LT, + CCS (MDEA), 90 (average)' (megajoule, CH, None)	Catalysts&adsorbents	0.00028327
('ReCiPe Midpoint (H) V1.13', 'metal depletion', 'MDP')	'ATR BM, HT+LT, + CCS (MDEA), 90 (average)' (megajoule, CH, None)	CO2 transport and storage	3.58683e-06
('ReCiPe Midpoint (H) V1.13', 'metal depletion', 'MDP')	'ATR BM, HT+LT, + CCS (MDEA), 90 (average)' (megajoule, CH, None)	Direct CO2 emissions	0
('ReCiPe Midpoint (H) V1.13', 'metal depletion', 'MDP')	'ATR BM, HT+LT, + CCS (MDEA), 90 (average)' (megajoule, CH, None)	Electricity from/to grid	2.86645e-05
('ReCiPe Midpoint (H) V1.13', 'metal depletion', 'MDP')	'ATR BM, HT+LT, + CCS (MDEA), 90 (average)' (megajoule, CH, None)	Emissions from fuel burning in furnace	0
('ReCiPe Midpoint (H) V1.13', 'metal depletion', 'MDP')	'ATR BM, HT+LT, + CCS (MDEA), 90 (average)' (megajoule, CH, None)	Fuel supply chain	0.00318383
('ReCiPe Midpoint (H) V1.13', 'metal depletion', 'MDP')	'ATR BM, HT+LT, + CCS (MDEA), 90 (average)' (megajoule, CH, None)	Plant infrastructure	0.000575174
('ReCiPe Midpoint (H) V1.13', 'metal depletion', 'MDP')	'ATR BM, HT+LT, + CCS (MDEA), 90 (average)' (megajoule, CH, None)	Water supply	2.07628e-06
('cumulative energy demand', 'fossil', 'non-renewable energy resources, fossil')	'ATR BM, HT+LT, + CCS (MDEA), 90 (lower bound)' (megajoule, CH, None)	Catalysts&adsorbents	0.00118945
('cumulative energy demand', 'fossil', 'non-renewable energy resources, fossil')	'ATR BM, HT+LT, + CCS (MDEA), 90 (lower bound)' (megajoule, CH, None)	CO2 transport and storage	0.00319407
('cumulative energy demand', 'fossil', 'non-renewable energy resources, fossil')	'ATR BM, HT+LT, + CCS (MDEA), 90 (lower bound)' (megajoule, CH, None)	Direct CO2 emissions	0
('cumulative energy demand', 'fossil', 'non-renewable energy resources, fossil')	'ATR BM, HT+LT, + CCS (MDEA), 90 (lower bound)' (megajoule, CH, None)	Electricity from/to grid	0.041406
('cumulative energy demand', 'fossil', 'non-renewable energy resources, fossil')	'ATR BM, HT+LT, + CCS (MDEA), 90 (lower bound)' (megajoule, CH, None)	Emissions from fuel burning in furnace	0
('cumulative energy demand', 'fossil', 'non-renewable energy resources, fossil')	'ATR BM, HT+LT, + CCS (MDEA), 90 (lower bound)' (megajoule, CH, None)	Fuel supply chain	0.116946
('cumulative energy demand', 'fossil', 'non-renewable energy resources, fossil')	'ATR BM, HT+LT, + CCS (MDEA), 90 (lower bound)' (megajoule, CH, None)	Plant infrastructure	0.00693806
('cumulative energy demand', 'fossil', 'non-renewable energy resources, fossil')	'ATR BM, HT+LT, + CCS (MDEA), 90 (lower bound)' (megajoule, CH, None)	Water supply	0.000277399
('cumulative energy demand', 'nuclear', 'non-renewable energy resources, nuclear')	'ATR BM, HT+LT, + CCS (MDEA), 90 (lower bound)' (megajoule, CH, None)	Catalysts&adsorbents	9.61237e-05
('cumulative energy demand', 'nuclear', 'non-renewable energy resources, nuclear')	'ATR BM, HT+LT, + CCS (MDEA), 90 (lower bound)' (megajoule, CH, None)	CO2 transport and storage	0.0024166
('cumulative energy demand', 'nuclear', 'non-renewable energy resources, nuclear')	'ATR BM, HT+LT, + CCS (MDEA), 90 (lower bound)' (megajoule, CH, None)	Direct CO2 emissions	0
('cumulative energy demand', 'nuclear', 'non-renewable energy resources, nuclear')	'ATR BM, HT+LT, + CCS (MDEA), 90 (lower bound)' (megajoule, CH, None)	Electricity from/to grid	0.0326729
('cumulative energy demand', 'nuclear', 'non-renewable energy resources, nuclear')	'ATR BM, HT+LT, + CCS (MDEA), 90 (lower bound)' (megajoule, CH, None)	Emissions from fuel burning in furnace	0
('cumulative energy demand', 'nuclear', 'non-renewable energy resources, nuclear')	'ATR BM, HT+LT, + CCS (MDEA), 90 (lower bound)' (megajoule, CH, None)	Fuel supply chain	0.0311952
('cumulative energy demand', 'nuclear', 'non-renewable energy resources, nuclear')	'ATR BM, HT+LT, + CCS (MDEA), 90 (lower bound)' (megajoule, CH, None)	Plant infrastructure	0.00171998
('cumulative energy demand', 'nuclear', 'non-renewable energy resources, nuclear')	'ATR BM, HT+LT, + CCS (MDEA), 90 (lower bound)' (megajoule, CH, None)	Water supply	5.86471e-05
('cumulative energy demand', 'primary forest', 'non-renewable energy resources, primary forest')	'ATR BM, HT+LT, + CCS (MDEA), 90 (lower bound)' (megajoule, CH, None)	Catalysts&adsorbents	2.22228e-08
('cumulative energy demand', 'primary forest', 'non-renewable energy resources, primary forest')	'ATR BM, HT+LT, + CCS (MDEA), 90 (lower bound)' (megajoule, CH, None)	CO2 transport and storage	4.70246e-08
('cumulative energy demand', 'primary forest', 'non-renewable energy resources, primary forest')	'ATR BM, HT+LT, + CCS (MDEA), 90 (lower bound)' (megajoule, CH, None)	Direct CO2 emissions	0
('cumulative energy demand', 'primary forest', 'non-renewable energy resources, primary forest')	'ATR BM, HT+LT, + CCS (MDEA), 90 (lower bound)' (megajoule, CH, None)	Electricity from/to grid	2.88162e-07
('cumulative energy demand', 'primary forest', 'non-renewable energy resources, primary forest')	'ATR BM, HT+LT, + CCS (MDEA), 90 (lower bound)' (megajoule, CH, None)	Emissions from fuel burning in furnace	0
('cumulative energy demand', 'primary forest', 'non-renewable energy resources, primary forest')	'ATR BM, HT+LT, + CCS (MDEA), 90 (lower bound)' (megajoule, CH, None)	Fuel supply chain	2.08208e-06
('cumulative energy demand', 'primary forest', 'non-renewable energy resources, primary forest')	'ATR BM, HT+LT, + CCS (MDEA), 90 (lower bound)' (megajoule, CH, None)	Plant infrastructure	3.70972e-07
('cumulative energy demand', 'primary forest', 'non-renewable energy resources, primary forest')	'ATR BM, HT+LT, + CCS (MDEA), 90 (lower bound)' (megajoule, CH, None)	Water supply	4.68063e-09
('ILCD 2.0 2018 midpoint', 'climate change', 'climate change total')	'ATR BM, HT+LT, + CCS (MDEA), 90 (lower bound)' (megajoule, CH, None)	Catalysts&adsorbents	9.75925e-05
('ILCD 2.0 2018 midpoint', 'climate change', 'climate change total')	'ATR BM, HT+LT, + CCS (MDEA), 90 (lower bound)' (megajoule, CH, None)	CO2 transport and storage	0.00026306
('ILCD 2.0 2018 midpoint', 'climate change', 'climate change total')	'ATR BM, HT+LT, + CCS (MDEA), 90 (lower bound)' (megajoule, CH, None)	Direct CO2 emissions	0.0103782
('ILCD 2.0 2018 midpoint', 'climate change', 'climate change total')	'ATR BM, HT+LT, + CCS (MDEA), 90 (lower bound)' (megajoule, CH, None)	Electricity from/to grid	0.00342816
('ILCD 2.0 2018 midpoint', 'climate change', 'climate change total')	'ATR BM, HT+LT, + CCS (MDEA), 90 (lower bound)' (megajoule, CH, None)	Emissions from fuel burning in furnace	0
('ILCD 2.0 2018 midpoint', 'climate change', 'climate change total')	'ATR BM, HT+LT, + CCS (MDEA), 90 (lower bound)' (megajoule, CH, None)	Fuel supply chain	-0.100381
('ILCD 2.0 2018 midpoint', 'climate change', 'climate change total')	'ATR BM, HT+LT, + CCS (MDEA), 90 (lower bound)' (megajoule, CH, None)	Plant infrastructure	0.000631279
('ILCD 2.0 2018 midpoint', 'climate change', 'climate change total')	'ATR BM, HT+LT, + CCS (MDEA), 90 (lower bound)' (megajoule, CH, None)	Water supply	2.27993e-05
('ILCD 2.0 2018 midpoint', 'ecosystem quality', 'freshwater and terrestrial acidification')	'ATR BM, HT+LT, + CCS (MDEA), 90 (lower bound)' (megajoule, CH, None)	Catalysts&adsorbents	7.88126e-06
('ILCD 2.0 2018 midpoint', 'ecosystem quality', 'freshwater and terrestrial acidification')	'ATR BM, HT+LT, + CCS (MDEA), 90 (lower bound)' (megajoule, CH, None)	CO2 transport and storage	1.47269e-06
('ILCD 2.0 2018 midpoint', 'ecosystem quality', 'freshwater and terrestrial acidification')	'ATR BM, HT+LT, + CCS (MDEA), 90 (lower bound)' (megajoule, CH, None)	Direct CO2 emissions	0
('ILCD 2.0 2018 midpoint', 'ecosystem quality', 'freshwater and terrestrial acidification')	'ATR BM, HT+LT, + CCS (MDEA), 90 (lower bound)' (megajoule, CH, None)	Electricity from/to grid	1.77354e-05
('ILCD 2.0 2018 midpoint', 'ecosystem quality', 'freshwater and terrestrial acidification')	'ATR BM, HT+LT, + CCS (MDEA), 90 (lower bound)' (megajoule, CH, None)	Emissions from fuel burning in furnace	1.8498e-05
('ILCD 2.0 2018 midpoint', 'ecosystem quality', 'freshwater and terrestrial acidification')	'ATR BM, HT+LT, + CCS (MDEA), 90 (lower bound)' (megajoule, CH, None)	Fuel supply chain	0.000125075
('ILCD 2.0 2018 midpoint', 'ecosystem quality', 'freshwater and terrestrial acidification')	'ATR BM, HT+LT, + CCS (MDEA), 90 (lower bound)' (megajoule, CH, None)	Plant infrastructure	7.89891e-06
('ILCD 2.0 2018 midpoint', 'ecosystem quality', 'freshwater and terrestrial acidification')	'ATR BM, HT+LT, + CCS (MDEA), 90 (lower bound)' (megajoule, CH, None)	Water supply	2.47425e-07
('ILCD 2.0 2018 midpoint', 'ecosystem quality', 'freshwater ecotoxicity')	'ATR BM, HT+LT, + CCS (MDEA), 90 (lower bound)' (megajoule, CH, None)	Catalysts&adsorbents	0.000631449
('ILCD 2.0 2018 midpoint', 'ecosystem quality', 'freshwater ecotoxicity')	'ATR BM, HT+LT, + CCS (MDEA), 90 (lower bound)' (megajoule, CH, None)	CO2 transport and storage	8.90568e-05
('ILCD 2.0 2018 midpoint', 'ecosystem quality', 'freshwater ecotoxicity')	'ATR BM, HT+LT, + CCS (MDEA), 90 (lower bound)' (megajoule, CH, None)	Direct CO2 emissions	0
('ILCD 2.0 2018 midpoint', 'ecosystem quality', 'freshwater ecotoxicity')	'ATR BM, HT+LT, + CCS (MDEA), 90 (lower bound)' (megajoule, CH, None)	Electricity from/to grid	0.000863343
('ILCD 2.0 2018 midpoint', 'ecosystem quality', 'freshwater ecotoxicity')	'ATR BM, HT+LT, + CCS (MDEA), 90 (lower bound)' (megajoule, CH, None)	Emissions from fuel burning in furnace	0
('ILCD 2.0 2018 midpoint', 'ecosystem quality', 'freshwater ecotoxicity')	'ATR BM, HT+LT, + CCS (MDEA), 90 (lower bound)' (megajoule, CH, None)	Fuel supply chain	0.0123108
('ILCD 2.0 2018 midpoint', 'ecosystem quality', 'freshwater ecotoxicity')	'ATR BM, HT+LT, + CCS (MDEA), 90 (lower bound)' (megajoule, CH, None)	Plant infrastructure	0.00217871
('ILCD 2.0 2018 midpoint', 'ecosystem quality', 'freshwater ecotoxicity')	'ATR BM, HT+LT, + CCS (MDEA), 90 (lower bound)' (megajoule, CH, None)	Water supply	3.76329e-05
('ILCD 2.0 2018 midpoint', 'ecosystem quality', 'marine eutrophication')	'ATR BM, HT+LT, + CCS (MDEA), 90 (lower bound)' (megajoule, CH, None)	Catalysts&adsorbents	2.59878e-07
('ILCD 2.0 2018 midpoint', 'ecosystem quality', 'marine eutrophication')	'ATR BM, HT+LT, + CCS (MDEA), 90 (lower bound)' (megajoule, CH, None)	CO2 transport and storage	2.67872e-07
('ILCD 2.0 2018 midpoint', 'ecosystem quality', 'marine eutrophication')	'ATR BM, HT+LT, + CCS (MDEA), 90 (lower bound)' (megajoule, CH, None)	Direct CO2 emissions	0
('ILCD 2.0 2018 midpoint', 'ecosystem quality', 'marine eutrophication')	'ATR BM, HT+LT, + CCS (MDEA), 90 (lower bound)' (megajoule, CH, None)	Electricity from/to grid	3.06488e-06
('ILCD 2.0 2018 midpoint', 'ecosystem quality', 'marine eutrophication')	'ATR BM, HT+LT, + CCS (MDEA), 90 (lower bound)' (megajoule, CH, None)	Emissions from fuel burning in furnace	9.72394e-06
('ILCD 2.0 2018 midpoint', 'ecosystem quality', 'marine eutrophication')	'ATR BM, HT+LT, + CCS (MDEA), 90 (lower bound)' (megajoule, CH, None)	Fuel supply chain	1.03927e-05
('ILCD 2.0 2018 midpoint', 'ecosystem quality', 'marine eutrophication')	'ATR BM, HT+LT, + CCS (MDEA), 90 (lower bound)' (megajoule, CH, None)	Plant infrastructure	8.8364e-07
('ILCD 2.0 2018 midpoint', 'ecosystem quality', 'marine eutrophication')	'ATR BM, HT+LT, + CCS (MDEA), 90 (lower bound)' (megajoule, CH, None)	Water supply	2.40939e-08
('ILCD 2.0 2018 midpoint', 'ecosystem quality', 'terrestrial eutrophication')	'ATR BM, HT+LT, + CCS (MDEA), 90 (lower bound)' (megajoule, CH, None)	Catalysts&adsorbents	3.32121e-06
('ILCD 2.0 2018 midpoint', 'ecosystem quality', 'terrestrial eutrophication')	'ATR BM, HT+LT, + CCS (MDEA), 90 (lower bound)' (megajoule, CH, None)	CO2 transport and storage	2.56377e-06
('ILCD 2.0 2018 midpoint', 'ecosystem quality', 'terrestrial eutrophication')	'ATR BM, HT+LT, + CCS (MDEA), 90 (lower bound)' (megajoule, CH, None)	Direct CO2 emissions	0
('ILCD 2.0 2018 midpoint', 'ecosystem quality', 'terrestrial eutrophication')	'ATR BM, HT+LT, + CCS (MDEA), 90 (lower bound)' (megajoule, CH, None)	Electricity from/to grid	2.84562e-05
('ILCD 2.0 2018 midpoint', 'ecosystem quality', 'terrestrial eutrophication')	'ATR BM, HT+LT, + CCS (MDEA), 90 (lower bound)' (megajoule, CH, None)	Emissions from fuel burning in furnace	0.000106488
('ILCD 2.0 2018 midpoint', 'ecosystem quality', 'terrestrial eutrophication')	'ATR BM, HT+LT, + CCS (MDEA), 90 (lower bound)' (megajoule, CH, None)	Fuel supply chain	0.000183954
('ILCD 2.0 2018 midpoint', 'ecosystem quality', 'terrestrial eutrophication')	'ATR BM, HT+LT, + CCS (MDEA), 90 (lower bound)' (megajoule, CH, None)	Plant infrastructure	1.03808e-05
('ILCD 2.0 2018 midpoint', 'ecosystem quality', 'terrestrial eutrophication')	'ATR BM, HT+LT, + CCS (MDEA), 90 (lower bound)' (megajoule, CH, None)	Water supply	2.44598e-07
('ILCD 2.0 2018 midpoint', 'human health', 'carcinogenic effects')	'ATR BM, HT+LT, + CCS (MDEA), 90 (lower bound)' (megajoule, CH, None)	Catalysts&adsorbents	2.33182e-11
('ILCD 2.0 2018 midpoint', 'human health', 'carcinogenic effects')	'ATR BM, HT+LT, + CCS (MDEA), 90 (lower bound)' (megajoule, CH, None)	CO2 transport and storage	3.39028e-12
('ILCD 2.0 2018 midpoint', 'human health', 'carcinogenic effects')	'ATR BM, HT+LT, + CCS (MDEA), 90 (lower bound)' (megajoule, CH, None)	Direct CO2 emissions	0
('ILCD 2.0 2018 midpoint', 'human health', 'carcinogenic effects')	'ATR BM, HT+LT, + CCS (MDEA), 90 (lower bound)' (megajoule, CH, None)	Electricity from/to grid	2.35023e-11
('ILCD 2.0 2018 midpoint', 'human health', 'carcinogenic effects')	'ATR BM, HT+LT, + CCS (MDEA), 90 (lower bound)' (megajoule, CH, None)	Emissions from fuel burning in furnace	0
('ILCD 2.0 2018 midpoint', 'human health', 'carcinogenic effects')	'ATR BM, HT+LT, + CCS (MDEA), 90 (lower bound)' (megajoule, CH, None)	Fuel supply chain	3.46697e-10
('ILCD 2.0 2018 midpoint', 'human health', 'carcinogenic effects')	'ATR BM, HT+LT, + CCS (MDEA), 90 (lower bound)' (megajoule, CH, None)	Plant infrastructure	7.30488e-11
('ILCD 2.0 2018 midpoint', 'human health', 'carcinogenic effects')	'ATR BM, HT+LT, + CCS (MDEA), 90 (lower bound)' (megajoule, CH, None)	Water supply	9.08745e-13
('ILCD 2.0 2018 midpoint', 'human health', 'ionising radiation')	'ATR BM, HT+LT, + CCS (MDEA), 90 (lower bound)' (megajoule, CH, None)	Catalysts&adsorbents	6.95e-06
('ILCD 2.0 2018 midpoint', 'human health', 'ionising radiation')	'ATR BM, HT+LT, + CCS (MDEA), 90 (lower bound)' (megajoule, CH, None)	CO2 transport and storage	0.000139917
('ILCD 2.0 2018 midpoint', 'human health', 'ionising radiation')	'ATR BM, HT+LT, + CCS (MDEA), 90 (lower bound)' (megajoule, CH, None)	Direct CO2 emissions	0
('ILCD 2.0 2018 midpoint', 'human health', 'ionising radiation')	'ATR BM, HT+LT, + CCS (MDEA), 90 (lower bound)' (megajoule, CH, None)	Electricity from/to grid	0.00189486
('ILCD 2.0 2018 midpoint', 'human health', 'ionising radiation')	'ATR BM, HT+LT, + CCS (MDEA), 90 (lower bound)' (megajoule, CH, None)	Emissions from fuel burning in furnace	0
('ILCD 2.0 2018 midpoint', 'human health', 'ionising radiation')	'ATR BM, HT+LT, + CCS (MDEA), 90 (lower bound)' (megajoule, CH, None)	Fuel supply chain	0.00206
('ILCD 2.0 2018 midpoint', 'human health', 'ionising radiation')	'ATR BM, HT+LT, + CCS (MDEA), 90 (lower bound)' (megajoule, CH, None)	Plant infrastructure	0.000106411
('ILCD 2.0 2018 midpoint', 'human health', 'ionising radiation')	'ATR BM, HT+LT, + CCS (MDEA), 90 (lower bound)' (megajoule, CH, None)	Water supply	3.82124e-06
('ILCD 2.0 2018 midpoint', 'human health', 'non-carcinogenic effects')	'ATR BM, HT+LT, + CCS (MDEA), 90 (lower bound)' (megajoule, CH, None)	Catalysts&adsorbents	1.68787e-10
('ILCD 2.0 2018 midpoint', 'human health', 'non-carcinogenic effects')	'ATR BM, HT+LT, + CCS (MDEA), 90 (lower bound)' (megajoule, CH, None)	CO2 transport and storage	2.95495e-11
('ILCD 2.0 2018 midpoint', 'human health', 'non-carcinogenic effects')	'ATR BM, HT+LT, + CCS (MDEA), 90 (lower bound)' (megajoule, CH, None)	Direct CO2 emissions	0
('ILCD 2.0 2018 midpoint', 'human health', 'non-carcinogenic effects')	'ATR BM, HT+LT, + CCS (MDEA), 90 (lower bound)' (megajoule, CH, None)	Electricity from/to grid	3.40593e-10
('ILCD 2.0 2018 midpoint', 'human health', 'non-carcinogenic effects')	'ATR BM, HT+LT, + CCS (MDEA), 90 (lower bound)' (megajoule, CH, None)	Emissions from fuel burning in furnace	0
('ILCD 2.0 2018 midpoint', 'human health', 'non-carcinogenic effects')	'ATR BM, HT+LT, + CCS (MDEA), 90 (lower bound)' (megajoule, CH, None)	Fuel supply chain	3.21407e-09
('ILCD 2.0 2018 midpoint', 'human health', 'non-carcinogenic effects')	'ATR BM, HT+LT, + CCS (MDEA), 90 (lower bound)' (megajoule, CH, None)	Plant infrastructure	5.72601e-10
('ILCD 2.0 2018 midpoint', 'human health', 'non-carcinogenic effects')	'ATR BM, HT+LT, + CCS (MDEA), 90 (lower bound)' (megajoule, CH, None)	Water supply	6.85547e-12
('ILCD 2.0 2018 midpoint', 'human health', 'ozone layer depletion')	'ATR BM, HT+LT, + CCS (MDEA), 90 (lower bound)' (megajoule, CH, None)	Catalysts&adsorbents	1.41481e-11
('ILCD 2.0 2018 midpoint', 'human health', 'ozone layer depletion')	'ATR BM, HT+LT, + CCS (MDEA), 90 (lower bound)' (megajoule, CH, None)	CO2 transport and storage	2.27076e-11
('ILCD 2.0 2018 midpoint', 'human health', 'ozone layer depletion')	'ATR BM, HT+LT, + CCS (MDEA), 90 (lower bound)' (megajoule, CH, None)	Direct CO2 emissions	0
('ILCD 2.0 2018 midpoint', 'human health', 'ozone layer depletion')	'ATR BM, HT+LT, + CCS (MDEA), 90 (lower bound)' (megajoule, CH, None)	Electricity from/to grid	2.93512e-10
('ILCD 2.0 2018 midpoint', 'human health', 'ozone layer depletion')	'ATR BM, HT+LT, + CCS (MDEA), 90 (lower bound)' (megajoule, CH, None)	Emissions from fuel burning in furnace	0
('ILCD 2.0 2018 midpoint', 'human health', 'ozone layer depletion')	'ATR BM, HT+LT, + CCS (MDEA), 90 (lower bound)' (megajoule, CH, None)	Fuel supply chain	9.73203e-10
('ILCD 2.0 2018 midpoint', 'human health', 'ozone layer depletion')	'ATR BM, HT+LT, + CCS (MDEA), 90 (lower bound)' (megajoule, CH, None)	Plant infrastructure	4.70935e-11
('ILCD 2.0 2018 midpoint', 'human health', 'ozone layer depletion')	'ATR BM, HT+LT, + CCS (MDEA), 90 (lower bound)' (megajoule, CH, None)	Water supply	1.53782e-11
('ILCD 2.0 2018 midpoint', 'human health', 'photochemical ozone creation')	'ATR BM, HT+LT, + CCS (MDEA), 90 (lower bound)' (megajoule, CH, None)	Catalysts&adsorbents	1.1345e-06
('ILCD 2.0 2018 midpoint', 'human health', 'photochemical ozone creation')	'ATR BM, HT+LT, + CCS (MDEA), 90 (lower bound)' (megajoule, CH, None)	CO2 transport and storage	6.58458e-07
('ILCD 2.0 2018 midpoint', 'human health', 'photochemical ozone creation')	'ATR BM, HT+LT, + CCS (MDEA), 90 (lower bound)' (megajoule, CH, None)	Direct CO2 emissions	0
('ILCD 2.0 2018 midpoint', 'human health', 'photochemical ozone creation')	'ATR BM, HT+LT, + CCS (MDEA), 90 (lower bound)' (megajoule, CH, None)	Electricity from/to grid	7.05701e-06
('ILCD 2.0 2018 midpoint', 'human health', 'photochemical ozone creation')	'ATR BM, HT+LT, + CCS (MDEA), 90 (lower bound)' (megajoule, CH, None)	Emissions from fuel burning in furnace	2.49973e-05
('ILCD 2.0 2018 midpoint', 'human health', 'photochemical ozone creation')	'ATR BM, HT+LT, + CCS (MDEA), 90 (lower bound)' (megajoule, CH, None)	Fuel supply chain	3.26026e-05
('ILCD 2.0 2018 midpoint', 'human health', 'photochemical ozone creation')	'ATR BM, HT+LT, + CCS (MDEA), 90 (lower bound)' (megajoule, CH, None)	Plant infrastructure	2.97279e-06
('ILCD 2.0 2018 midpoint', 'human health', 'photochemical ozone creation')	'ATR BM, HT+LT, + CCS (MDEA), 90 (lower bound)' (megajoule, CH, None)	Water supply	7.74425e-08
('ILCD 2.0 2018 midpoint', 'human health', 'respiratory effects, inorganics')	'ATR BM, HT+LT, + CCS (MDEA), 90 (lower bound)' (megajoule, CH, None)	Catalysts&adsorbents	1.47362e-11
('ILCD 2.0 2018 midpoint', 'human health', 'respiratory effects, inorganics')	'ATR BM, HT+LT, + CCS (MDEA), 90 (lower bound)' (megajoule, CH, None)	CO2 transport and storage	5.07981e-12
('ILCD 2.0 2018 midpoint', 'human health', 'respiratory effects, inorganics')	'ATR BM, HT+LT, + CCS (MDEA), 90 (lower bound)' (megajoule, CH, None)	Direct CO2 emissions	0
('ILCD 2.0 2018 midpoint', 'human health', 'respiratory effects, inorganics')	'ATR BM, HT+LT, + CCS (MDEA), 90 (lower bound)' (megajoule, CH, None)	Electricity from/to grid	5.18975e-11
('ILCD 2.0 2018 midpoint', 'human health', 'respiratory effects, inorganics')	'ATR BM, HT+LT, + CCS (MDEA), 90 (lower bound)' (megajoule, CH, None)	Emissions from fuel burning in furnace	3.99956e-11
('ILCD 2.0 2018 midpoint', 'human health', 'respiratory effects, inorganics')	'ATR BM, HT+LT, + CCS (MDEA), 90 (lower bound)' (megajoule, CH, None)	Fuel supply chain	8.9363e-10
('ILCD 2.0 2018 midpoint', 'human health', 'respiratory effects, inorganics')	'ATR BM, HT+LT, + CCS (MDEA), 90 (lower bound)' (megajoule, CH, None)	Plant infrastructure	4.70314e-11
('ILCD 2.0 2018 midpoint', 'human health', 'respiratory effects, inorganics')	'ATR BM, HT+LT, + CCS (MDEA), 90 (lower bound)' (megajoule, CH, None)	Water supply	1.74323e-12
('ILCD 2.0 2018 midpoint', 'resources', 'fossils')	'ATR BM, HT+LT, + CCS (MDEA), 90 (lower bound)' (megajoule, CH, None)	Catalysts&adsorbents	0.00138009
('ILCD 2.0 2018 midpoint', 'resources', 'fossils')	'ATR BM, HT+LT, + CCS (MDEA), 90 (lower bound)' (megajoule, CH, None)	CO2 transport and storage	0.00605085
('ILCD 2.0 2018 midpoint', 'resources', 'fossils')	'ATR BM, HT+LT, + CCS (MDEA), 90 (lower bound)' (megajoule, CH, None)	Direct CO2 emissions	0
('ILCD 2.0 2018 midpoint', 'resources', 'fossils')	'ATR BM, HT+LT, + CCS (MDEA), 90 (lower bound)' (megajoule, CH, None)	Electricity from/to grid	0.0798133
('ILCD 2.0 2018 midpoint', 'resources', 'fossils')	'ATR BM, HT+LT, + CCS (MDEA), 90 (lower bound)' (megajoule, CH, None)	Emissions from fuel burning in furnace	0
('ILCD 2.0 2018 midpoint', 'resources', 'fossils')	'ATR BM, HT+LT, + CCS (MDEA), 90 (lower bound)' (megajoule, CH, None)	Fuel supply chain	0.158317
('ILCD 2.0 2018 midpoint', 'resources', 'fossils')	'ATR BM, HT+LT, + CCS (MDEA), 90 (lower bound)' (megajoule, CH, None)	Plant infrastructure	0.00956902
('ILCD 2.0 2018 midpoint', 'resources', 'fossils')	'ATR BM, HT+LT, + CCS (MDEA), 90 (lower bound)' (megajoule, CH, None)	Water supply	0.000352254
('ILCD 2.0 2018 midpoint', 'resources', 'land use')	'ATR BM, HT+LT, + CCS (MDEA), 90 (lower bound)' (megajoule, CH, None)	Catalysts&adsorbents	0.00114993
('ILCD 2.0 2018 midpoint', 'resources', 'land use')	'ATR BM, HT+LT, + CCS (MDEA), 90 (lower bound)' (megajoule, CH, None)	CO2 transport and storage	0.00247954
('ILCD 2.0 2018 midpoint', 'resources', 'land use')	'ATR BM, HT+LT, + CCS (MDEA), 90 (lower bound)' (megajoule, CH, None)	Direct CO2 emissions	0
('ILCD 2.0 2018 midpoint', 'resources', 'land use')	'ATR BM, HT+LT, + CCS (MDEA), 90 (lower bound)' (megajoule, CH, None)	Electricity from/to grid	0.0350762
('ILCD 2.0 2018 midpoint', 'resources', 'land use')	'ATR BM, HT+LT, + CCS (MDEA), 90 (lower bound)' (megajoule, CH, None)	Emissions from fuel burning in furnace	0
('ILCD 2.0 2018 midpoint', 'resources', 'land use')	'ATR BM, HT+LT, + CCS (MDEA), 90 (lower bound)' (megajoule, CH, None)	Fuel supply chain	0.14078
('ILCD 2.0 2018 midpoint', 'resources', 'land use')	'ATR BM, HT+LT, + CCS (MDEA), 90 (lower bound)' (megajoule, CH, None)	Plant infrastructure	0.0215588
('ILCD 2.0 2018 midpoint', 'resources', 'land use')	'ATR BM, HT+LT, + CCS (MDEA), 90 (lower bound)' (megajoule, CH, None)	Water supply	0.000178245
('ILCD 2.0 2018 midpoint', 'resources', 'minerals and metals')	'ATR BM, HT+LT, + CCS (MDEA), 90 (lower bound)' (megajoule, CH, None)	Catalysts&adsorbents	1.5601e-08
('ILCD 2.0 2018 midpoint', 'resources', 'minerals and metals')	'ATR BM, HT+LT, + CCS (MDEA), 90 (lower bound)' (megajoule, CH, None)	CO2 transport and storage	8.14624e-10
('ILCD 2.0 2018 midpoint', 'resources', 'minerals and metals')	'ATR BM, HT+LT, + CCS (MDEA), 90 (lower bound)' (megajoule, CH, None)	Direct CO2 emissions	0
('ILCD 2.0 2018 midpoint', 'resources', 'minerals and metals')	'ATR BM, HT+LT, + CCS (MDEA), 90 (lower bound)' (megajoule, CH, None)	Electricity from/to grid	7.96527e-09
('ILCD 2.0 2018 midpoint', 'resources', 'minerals and metals')	'ATR BM, HT+LT, + CCS (MDEA), 90 (lower bound)' (megajoule, CH, None)	Emissions from fuel burning in furnace	0
('ILCD 2.0 2018 midpoint', 'resources', 'minerals and metals')	'ATR BM, HT+LT, + CCS (MDEA), 90 (lower bound)' (megajoule, CH, None)	Fuel supply chain	1.24661e-06
('ILCD 2.0 2018 midpoint', 'resources', 'minerals and metals')	'ATR BM, HT+LT, + CCS (MDEA), 90 (lower bound)' (megajoule, CH, None)	Plant infrastructure	1.81183e-07
('ILCD 2.0 2018 midpoint', 'resources', 'minerals and metals')	'ATR BM, HT+LT, + CCS (MDEA), 90 (lower bound)' (megajoule, CH, None)	Water supply	6.76658e-10
('ReCiPe Midpoint (H) V1.13', 'metal depletion', 'MDP')	'ATR BM, HT+LT, + CCS (MDEA), 90 (lower bound)' (megajoule, CH, None)	Catalysts&adsorbents	0.00028353
('ReCiPe Midpoint (H) V1.13', 'metal depletion', 'MDP')	'ATR BM, HT+LT, + CCS (MDEA), 90 (lower bound)' (megajoule, CH, None)	CO2 transport and storage	3.58683e-06
('ReCiPe Midpoint (H) V1.13', 'metal depletion', 'MDP')	'ATR BM, HT+LT, + CCS (MDEA), 90 (lower bound)' (megajoule, CH, None)	Direct CO2 emissions	0
('ReCiPe Midpoint (H) V1.13', 'metal depletion', 'MDP')	'ATR BM, HT+LT, + CCS (MDEA), 90 (lower bound)' (megajoule, CH, None)	Electricity from/to grid	2.86079e-05
('ReCiPe Midpoint (H) V1.13', 'metal depletion', 'MDP')	'ATR BM, HT+LT, + CCS (MDEA), 90 (lower bound)' (megajoule, CH, None)	Emissions from fuel burning in furnace	0
('ReCiPe Midpoint (H) V1.13', 'metal depletion', 'MDP')	'ATR BM, HT+LT, + CCS (MDEA), 90 (lower bound)' (megajoule, CH, None)	Fuel supply chain	0.00318383
('ReCiPe Midpoint (H) V1.13', 'metal depletion', 'MDP')	'ATR BM, HT+LT, + CCS (MDEA), 90 (lower bound)' (megajoule, CH, None)	Plant infrastructure	0.000575174
('ReCiPe Midpoint (H) V1.13', 'metal depletion', 'MDP')	'ATR BM, HT+LT, + CCS (MDEA), 90 (lower bound)' (megajoule, CH, None)	Water supply	2.07628e-06
('cumulative energy demand', 'fossil', 'non-renewable energy resources, fossil')	'ATR BM, HT+LT, + CCS (MDEA), 90 (upper bound)' (megajoule, CH, None)	Catalysts&adsorbents	0.00118945
('cumulative energy demand', 'fossil', 'non-renewable energy resources, fossil')	'ATR BM, HT+LT, + CCS (MDEA), 90 (upper bound)' (megajoule, CH, None)	CO2 transport and storage	0.00319407
('cumulative energy demand', 'fossil', 'non-renewable energy resources, fossil')	'ATR BM, HT+LT, + CCS (MDEA), 90 (upper bound)' (megajoule, CH, None)	Direct CO2 emissions	0
('cumulative energy demand', 'fossil', 'non-renewable energy resources, fossil')	'ATR BM, HT+LT, + CCS (MDEA), 90 (upper bound)' (megajoule, CH, None)	Electricity from/to grid	0.0415701
('cumulative energy demand', 'fossil', 'non-renewable energy resources, fossil')	'ATR BM, HT+LT, + CCS (MDEA), 90 (upper bound)' (megajoule, CH, None)	Emissions from fuel burning in furnace	0
('cumulative energy demand', 'fossil', 'non-renewable energy resources, fossil')	'ATR BM, HT+LT, + CCS (MDEA), 90 (upper bound)' (megajoule, CH, None)	Fuel supply chain	0.116946
('cumulative energy demand', 'fossil', 'non-renewable energy resources, fossil')	'ATR BM, HT+LT, + CCS (MDEA), 90 (upper bound)' (megajoule, CH, None)	Plant infrastructure	0.00693806
('cumulative energy demand', 'fossil', 'non-renewable energy resources, fossil')	'ATR BM, HT+LT, + CCS (MDEA), 90 (upper bound)' (megajoule, CH, None)	Water supply	0.000277399
('cumulative energy demand', 'nuclear', 'non-renewable energy resources, nuclear')	'ATR BM, HT+LT, + CCS (MDEA), 90 (upper bound)' (megajoule, CH, None)	Catalysts&adsorbents	9.61237e-05
('cumulative energy demand', 'nuclear', 'non-renewable energy resources, nuclear')	'ATR BM, HT+LT, + CCS (MDEA), 90 (upper bound)' (megajoule, CH, None)	CO2 transport and storage	0.0024166
('cumulative energy demand', 'nuclear', 'non-renewable energy resources, nuclear')	'ATR BM, HT+LT, + CCS (MDEA), 90 (upper bound)' (megajoule, CH, None)	Direct CO2 emissions	0
('cumulative energy demand', 'nuclear', 'non-renewable energy resources, nuclear')	'ATR BM, HT+LT, + CCS (MDEA), 90 (upper bound)' (megajoule, CH, None)	Electricity from/to grid	0.0328024
('cumulative energy demand', 'nuclear', 'non-renewable energy resources, nuclear')	'ATR BM, HT+LT, + CCS (MDEA), 90 (upper bound)' (megajoule, CH, None)	Emissions from fuel burning in furnace	0
('cumulative energy demand', 'nuclear', 'non-renewable energy resources, nuclear')	'ATR BM, HT+LT, + CCS (MDEA), 90 (upper bound)' (megajoule, CH, None)	Fuel supply chain	0.0311952
('cumulative energy demand', 'nuclear', 'non-renewable energy resources, nuclear')	'ATR BM, HT+LT, + CCS (MDEA), 90 (upper bound)' (megajoule, CH, None)	Plant infrastructure	0.00171998
('cumulative energy demand', 'nuclear', 'non-renewable energy resources, nuclear')	'ATR BM, HT+LT, + CCS (MDEA), 90 (upper bound)' (megajoule, CH, None)	Water supply	5.86471e-05
('cumulative energy demand', 'primary forest', 'non-renewable energy resources, primary forest')	'ATR BM, HT+LT, + CCS (MDEA), 90 (upper bound)' (megajoule, CH, None)	Catalysts&adsorbents	2.22228e-08
('cumulative energy demand', 'primary forest', 'non-renewable energy resources, primary forest')	'ATR BM, HT+LT, + CCS (MDEA), 90 (upper bound)' (megajoule, CH, None)	CO2 transport and storage	4.70246e-08
('cumulative energy demand', 'primary forest', 'non-renewable energy resources, primary forest')	'ATR BM, HT+LT, + CCS (MDEA), 90 (upper bound)' (megajoule, CH, None)	Direct CO2 emissions	0
('cumulative energy demand', 'primary forest', 'non-renewable energy resources, primary forest')	'ATR BM, HT+LT, + CCS (MDEA), 90 (upper bound)' (megajoule, CH, None)	Electricity from/to grid	2.89304e-07
('cumulative energy demand', 'primary forest', 'non-renewable energy resources, primary forest')	'ATR BM, HT+LT, + CCS (MDEA), 90 (upper bound)' (megajoule, CH, None)	Emissions from fuel burning in furnace	0
('cumulative energy demand', 'primary forest', 'non-renewable energy resources, primary forest')	'ATR BM, HT+LT, + CCS (MDEA), 90 (upper bound)' (megajoule, CH, None)	Fuel supply chain	2.08208e-06
('cumulative energy demand', 'primary forest', 'non-renewable energy resources, primary forest')	'ATR BM, HT+LT, + CCS (MDEA), 90 (upper bound)' (megajoule, CH, None)	Plant infrastructure	3.70972e-07
('cumulative energy demand', 'primary forest', 'non-renewable energy resources, primary forest')	'ATR BM, HT+LT, + CCS (MDEA), 90 (upper bound)' (megajoule, CH, None)	Water supply	4.68063e-09
('ILCD 2.0 2018 midpoint', 'climate change', 'climate change total')	'ATR BM, HT+LT, + CCS (MDEA), 90 (upper bound)' (megajoule, CH, None)	Catalysts&adsorbents	9.75925e-05
('ILCD 2.0 2018 midpoint', 'climate change', 'climate change total')	'ATR BM, HT+LT, + CCS (MDEA), 90 (upper bound)' (megajoule, CH, None)	CO2 transport and storage	0.00026306
('ILCD 2.0 2018 midpoint', 'climate change', 'climate change total')	'ATR BM, HT+LT, + CCS (MDEA), 90 (upper bound)' (megajoule, CH, None)	Direct CO2 emissions	0.0103782
('ILCD 2.0 2018 midpoint', 'climate change', 'climate change total')	'ATR BM, HT+LT, + CCS (MDEA), 90 (upper bound)' (megajoule, CH, None)	Electricity from/to grid	0.00344174
('ILCD 2.0 2018 midpoint', 'climate change', 'climate change total')	'ATR BM, HT+LT, + CCS (MDEA), 90 (upper bound)' (megajoule, CH, None)	Emissions from fuel burning in furnace	0
('ILCD 2.0 2018 midpoint', 'climate change', 'climate change total')	'ATR BM, HT+LT, + CCS (MDEA), 90 (upper bound)' (megajoule, CH, None)	Fuel supply chain	-0.100381
('ILCD 2.0 2018 midpoint', 'climate change', 'climate change total')	'ATR BM, HT+LT, + CCS (MDEA), 90 (upper bound)' (megajoule, CH, None)	Plant infrastructure	0.000631279
('ILCD 2.0 2018 midpoint', 'climate change', 'climate change total')	'ATR BM, HT+LT, + CCS (MDEA), 90 (upper bound)' (megajoule, CH, None)	Water supply	2.27993e-05
('ILCD 2.0 2018 midpoint', 'ecosystem quality', 'freshwater and terrestrial acidification')	'ATR BM, HT+LT, + CCS (MDEA), 90 (upper bound)' (megajoule, CH, None)	Catalysts&adsorbents	7.88126e-06
('ILCD 2.0 2018 midpoint', 'ecosystem quality', 'freshwater and terrestrial acidification')	'ATR BM, HT+LT, + CCS (MDEA), 90 (upper bound)' (megajoule, CH, None)	CO2 transport and storage	1.47269e-06
('ILCD 2.0 2018 midpoint', 'ecosystem quality', 'freshwater and terrestrial acidification')	'ATR BM, HT+LT, + CCS (MDEA), 90 (upper bound)' (megajoule, CH, None)	Direct CO2 emissions	0
('ILCD 2.0 2018 midpoint', 'ecosystem quality', 'freshwater and terrestrial acidification')	'ATR BM, HT+LT, + CCS (MDEA), 90 (upper bound)' (megajoule, CH, None)	Electricity from/to grid	1.78057e-05
('ILCD 2.0 2018 midpoint', 'ecosystem quality', 'freshwater and terrestrial acidification')	'ATR BM, HT+LT, + CCS (MDEA), 90 (upper bound)' (megajoule, CH, None)	Emissions from fuel burning in furnace	1.8498e-05
('ILCD 2.0 2018 midpoint', 'ecosystem quality', 'freshwater and terrestrial acidification')	'ATR BM, HT+LT, + CCS (MDEA), 90 (upper bound)' (megajoule, CH, None)	Fuel supply chain	0.000125075
('ILCD 2.0 2018 midpoint', 'ecosystem quality', 'freshwater and terrestrial acidification')	'ATR BM, HT+LT, + CCS (MDEA), 90 (upper bound)' (megajoule, CH, None)	Plant infrastructure	7.89891e-06
('ILCD 2.0 2018 midpoint', 'ecosystem quality', 'freshwater and terrestrial acidification')	'ATR BM, HT+LT, + CCS (MDEA), 90 (upper bound)' (megajoule, CH, None)	Water supply	2.47425e-07
('ILCD 2.0 2018 midpoint', 'ecosystem quality', 'freshwater ecotoxicity')	'ATR BM, HT+LT, + CCS (MDEA), 90 (upper bound)' (megajoule, CH, None)	Catalysts&adsorbents	0.000631449
('ILCD 2.0 2018 midpoint', 'ecosystem quality', 'freshwater ecotoxicity')	'ATR BM, HT+LT, + CCS (MDEA), 90 (upper bound)' (megajoule, CH, None)	CO2 transport and storage	8.90568e-05
('ILCD 2.0 2018 midpoint', 'ecosystem quality', 'freshwater ecotoxicity')	'ATR BM, HT+LT, + CCS (MDEA), 90 (upper bound)' (megajoule, CH, None)	Direct CO2 emissions	0
('ILCD 2.0 2018 midpoint', 'ecosystem quality', 'freshwater ecotoxicity')	'ATR BM, HT+LT, + CCS (MDEA), 90 (upper bound)' (megajoule, CH, None)	Electricity from/to grid	0.000866763
('ILCD 2.0 2018 midpoint', 'ecosystem quality', 'freshwater ecotoxicity')	'ATR BM, HT+LT, + CCS (MDEA), 90 (upper bound)' (megajoule, CH, None)	Emissions from fuel burning in furnace	0
('ILCD 2.0 2018 midpoint', 'ecosystem quality', 'freshwater ecotoxicity')	'ATR BM, HT+LT, + CCS (MDEA), 90 (upper bound)' (megajoule, CH, None)	Fuel supply chain	0.0123108
('ILCD 2.0 2018 midpoint', 'ecosystem quality', 'freshwater ecotoxicity')	'ATR BM, HT+LT, + CCS (MDEA), 90 (upper bound)' (megajoule, CH, None)	Plant infrastructure	0.00217871
('ILCD 2.0 2018 midpoint', 'ecosystem quality', 'freshwater ecotoxicity')	'ATR BM, HT+LT, + CCS (MDEA), 90 (upper bound)' (megajoule, CH, None)	Water supply	3.76329e-05
('ILCD 2.0 2018 midpoint', 'ecosystem quality', 'marine eutrophication')	'ATR BM, HT+LT, + CCS (MDEA), 90 (upper bound)' (megajoule, CH, None)	Catalysts&adsorbents	2.59878e-07
('ILCD 2.0 2018 midpoint', 'ecosystem quality', 'marine eutrophication')	'ATR BM, HT+LT, + CCS (MDEA), 90 (upper bound)' (megajoule, CH, None)	CO2 transport and storage	2.67872e-07
('ILCD 2.0 2018 midpoint', 'ecosystem quality', 'marine eutrophication')	'ATR BM, HT+LT, + CCS (MDEA), 90 (upper bound)' (megajoule, CH, None)	Direct CO2 emissions	0
('ILCD 2.0 2018 midpoint', 'ecosystem quality', 'marine eutrophication')	'ATR BM, HT+LT, + CCS (MDEA), 90 (upper bound)' (megajoule, CH, None)	Electricity from/to grid	3.07702e-06
('ILCD 2.0 2018 midpoint', 'ecosystem quality', 'marine eutrophication')	'ATR BM, HT+LT, + CCS (MDEA), 90 (upper bound)' (megajoule, CH, None)	Emissions from fuel burning in furnace	9.72394e-06
('ILCD 2.0 2018 midpoint', 'ecosystem quality', 'marine eutrophication')	'ATR BM, HT+LT, + CCS (MDEA), 90 (upper bound)' (megajoule, CH, None)	Fuel supply chain	1.03927e-05
('ILCD 2.0 2018 midpoint', 'ecosystem quality', 'marine eutrophication')	'ATR BM, HT+LT, + CCS (MDEA), 90 (upper bound)' (megajoule, CH, None)	Plant infrastructure	8.8364e-07
('ILCD 2.0 2018 midpoint', 'ecosystem quality', 'marine eutrophication')	'ATR BM, HT+LT, + CCS (MDEA), 90 (upper bound)' (megajoule, CH, None)	Water supply	2.40939e-08
('ILCD 2.0 2018 midpoint', 'ecosystem quality', 'terrestrial eutrophication')	'ATR BM, HT+LT, + CCS (MDEA), 90 (upper bound)' (megajoule, CH, None)	Catalysts&adsorbents	3.32121e-06
('ILCD 2.0 2018 midpoint', 'ecosystem quality', 'terrestrial eutrophication')	'ATR BM, HT+LT, + CCS (MDEA), 90 (upper bound)' (megajoule, CH, None)	CO2 transport and storage	2.56377e-06
('ILCD 2.0 2018 midpoint', 'ecosystem quality', 'terrestrial eutrophication')	'ATR BM, HT+LT, + CCS (MDEA), 90 (upper bound)' (megajoule, CH, None)	Direct CO2 emissions	0
('ILCD 2.0 2018 midpoint', 'ecosystem quality', 'terrestrial eutrophication')	'ATR BM, HT+LT, + CCS (MDEA), 90 (upper bound)' (megajoule, CH, None)	Electricity from/to grid	2.85689e-05
('ILCD 2.0 2018 midpoint', 'ecosystem quality', 'terrestrial eutrophication')	'ATR BM, HT+LT, + CCS (MDEA), 90 (upper bound)' (megajoule, CH, None)	Emissions from fuel burning in furnace	0.000106488
('ILCD 2.0 2018 midpoint', 'ecosystem quality', 'terrestrial eutrophication')	'ATR BM, HT+LT, + CCS (MDEA), 90 (upper bound)' (megajoule, CH, None)	Fuel supply chain	0.000183954
('ILCD 2.0 2018 midpoint', 'ecosystem quality', 'terrestrial eutrophication')	'ATR BM, HT+LT, + CCS (MDEA), 90 (upper bound)' (megajoule, CH, None)	Plant infrastructure	1.03808e-05
('ILCD 2.0 2018 midpoint', 'ecosystem quality', 'terrestrial eutrophication')	'ATR BM, HT+LT, + CCS (MDEA), 90 (upper bound)' (megajoule, CH, None)	Water supply	2.44598e-07
('ILCD 2.0 2018 midpoint', 'human health', 'carcinogenic effects')	'ATR BM, HT+LT, + CCS (MDEA), 90 (upper bound)' (megajoule, CH, None)	Catalysts&adsorbents	2.33182e-11
('ILCD 2.0 2018 midpoint', 'human health', 'carcinogenic effects')	'ATR BM, HT+LT, + CCS (MDEA), 90 (upper bound)' (megajoule, CH, None)	CO2 transport and storage	3.39028e-12
('ILCD 2.0 2018 midpoint', 'human health', 'carcinogenic effects')	'ATR BM, HT+LT, + CCS (MDEA), 90 (upper bound)' (megajoule, CH, None)	Direct CO2 emissions	0
('ILCD 2.0 2018 midpoint', 'human health', 'carcinogenic effects')	'ATR BM, HT+LT, + CCS (MDEA), 90 (upper bound)' (megajoule, CH, None)	Electricity from/to grid	2.35954e-11
('ILCD 2.0 2018 midpoint', 'human health', 'carcinogenic effects')	'ATR BM, HT+LT, + CCS (MDEA), 90 (upper bound)' (megajoule, CH, None)	Emissions from fuel burning in furnace	0
('ILCD 2.0 2018 midpoint', 'human health', 'carcinogenic effects')	'ATR BM, HT+LT, + CCS (MDEA), 90 (upper bound)' (megajoule, CH, None)	Fuel supply chain	3.46697e-10
('ILCD 2.0 2018 midpoint', 'human health', 'carcinogenic effects')	'ATR BM, HT+LT, + CCS (MDEA), 90 (upper bound)' (megajoule, CH, None)	Plant infrastructure	7.30488e-11
('ILCD 2.0 2018 midpoint', 'human health', 'carcinogenic effects')	'ATR BM, HT+LT, + CCS (MDEA), 90 (upper bound)' (megajoule, CH, None)	Water supply	9.08745e-13
('ILCD 2.0 2018 midpoint', 'human health', 'ionising radiation')	'ATR BM, HT+LT, + CCS (MDEA), 90 (upper bound)' (megajoule, CH, None)	Catalysts&adsorbents	6.95e-06
('ILCD 2.0 2018 midpoint', 'human health', 'ionising radiation')	'ATR BM, HT+LT, + CCS (MDEA), 90 (upper bound)' (megajoule, CH, None)	CO2 transport and storage	0.000139917
('ILCD 2.0 2018 midpoint', 'human health', 'ionising radiation')	'ATR BM, HT+LT, + CCS (MDEA), 90 (upper bound)' (megajoule, CH, None)	Direct CO2 emissions	0
('ILCD 2.0 2018 midpoint', 'human health', 'ionising radiation')	'ATR BM, HT+LT, + CCS (MDEA), 90 (upper bound)' (megajoule, CH, None)	Electricity from/to grid	0.00190236
('ILCD 2.0 2018 midpoint', 'human health', 'ionising radiation')	'ATR BM, HT+LT, + CCS (MDEA), 90 (upper bound)' (megajoule, CH, None)	Emissions from fuel burning in furnace	0
('ILCD 2.0 2018 midpoint', 'human health', 'ionising radiation')	'ATR BM, HT+LT, + CCS (MDEA), 90 (upper bound)' (megajoule, CH, None)	Fuel supply chain	0.00206
('ILCD 2.0 2018 midpoint', 'human health', 'ionising radiation')	'ATR BM, HT+LT, + CCS (MDEA), 90 (upper bound)' (megajoule, CH, None)	Plant infrastructure	0.000106411
('ILCD 2.0 2018 midpoint', 'human health', 'ionising radiation')	'ATR BM, HT+LT, + CCS (MDEA), 90 (upper bound)' (megajoule, CH, None)	Water supply	3.82124e-06
('ILCD 2.0 2018 midpoint', 'human health', 'non-carcinogenic effects')	'ATR BM, HT+LT, + CCS (MDEA), 90 (upper bound)' (megajoule, CH, None)	Catalysts&adsorbents	1.68787e-10
('ILCD 2.0 2018 midpoint', 'human health', 'non-carcinogenic effects')	'ATR BM, HT+LT, + CCS (MDEA), 90 (upper bound)' (megajoule, CH, None)	CO2 transport and storage	2.95495e-11
('ILCD 2.0 2018 midpoint', 'human health', 'non-carcinogenic effects')	'ATR BM, HT+LT, + CCS (MDEA), 90 (upper bound)' (megajoule, CH, None)	Direct CO2 emissions	0
('ILCD 2.0 2018 midpoint', 'human health', 'non-carcinogenic effects')	'ATR BM, HT+LT, + CCS (MDEA), 90 (upper bound)' (megajoule, CH, None)	Electricity from/to grid	3.41942e-10
('ILCD 2.0 2018 midpoint', 'human health', 'non-carcinogenic effects')	'ATR BM, HT+LT, + CCS (MDEA), 90 (upper bound)' (megajoule, CH, None)	Emissions from fuel burning in furnace	0
('ILCD 2.0 2018 midpoint', 'human health', 'non-carcinogenic effects')	'ATR BM, HT+LT, + CCS (MDEA), 90 (upper bound)' (megajoule, CH, None)	Fuel supply chain	3.21407e-09
('ILCD 2.0 2018 midpoint', 'human health', 'non-carcinogenic effects')	'ATR BM, HT+LT, + CCS (MDEA), 90 (upper bound)' (megajoule, CH, None)	Plant infrastructure	5.72601e-10
('ILCD 2.0 2018 midpoint', 'human health', 'non-carcinogenic effects')	'ATR BM, HT+LT, + CCS (MDEA), 90 (upper bound)' (megajoule, CH, None)	Water supply	6.85547e-12
('ILCD 2.0 2018 midpoint', 'human health', 'ozone layer depletion')	'ATR BM, HT+LT, + CCS (MDEA), 90 (upper bound)' (megajoule, CH, None)	Catalysts&adsorbents	1.41481e-11
('ILCD 2.0 2018 midpoint', 'human health', 'ozone layer depletion')	'ATR BM, HT+LT, + CCS (MDEA), 90 (upper bound)' (megajoule, CH, None)	CO2 transport and storage	2.27076e-11
('ILCD 2.0 2018 midpoint', 'human health', 'ozone layer depletion')	'ATR BM, HT+LT, + CCS (MDEA), 90 (upper bound)' (megajoule, CH, None)	Direct CO2 emissions	0
('ILCD 2.0 2018 midpoint', 'human health', 'ozone layer depletion')	'ATR BM, HT+LT, + CCS (MDEA), 90 (upper bound)' (megajoule, CH, None)	Electricity from/to grid	2.94675e-10
('ILCD 2.0 2018 midpoint', 'human health', 'ozone layer depletion')	'ATR BM, HT+LT, + CCS (MDEA), 90 (upper bound)' (megajoule, CH, None)	Emissions from fuel burning in furnace	0
('ILCD 2.0 2018 midpoint', 'human health', 'ozone layer depletion')	'ATR BM, HT+LT, + CCS (MDEA), 90 (upper bound)' (megajoule, CH, None)	Fuel supply chain	9.73203e-10
('ILCD 2.0 2018 midpoint', 'human health', 'ozone layer depletion')	'ATR BM, HT+LT, + CCS (MDEA), 90 (upper bound)' (megajoule, CH, None)	Plant infrastructure	4.70935e-11
('ILCD 2.0 2018 midpoint', 'human health', 'ozone layer depletion')	'ATR BM, HT+LT, + CCS (MDEA), 90 (upper bound)' (megajoule, CH, None)	Water supply	1.53782e-11
('ILCD 2.0 2018 midpoint', 'human health', 'photochemical ozone creation')	'ATR BM, HT+LT, + CCS (MDEA), 90 (upper bound)' (megajoule, CH, None)	Catalysts&adsorbents	1.1345e-06
('ILCD 2.0 2018 midpoint', 'human health', 'photochemical ozone creation')	'ATR BM, HT+LT, + CCS (MDEA), 90 (upper bound)' (megajoule, CH, None)	CO2 transport and storage	6.58458e-07
('ILCD 2.0 2018 midpoint', 'human health', 'photochemical ozone creation')	'ATR BM, HT+LT, + CCS (MDEA), 90 (upper bound)' (megajoule, CH, None)	Direct CO2 emissions	0
('ILCD 2.0 2018 midpoint', 'human health', 'photochemical ozone creation')	'ATR BM, HT+LT, + CCS (MDEA), 90 (upper bound)' (megajoule, CH, None)	Electricity from/to grid	7.08497e-06
('ILCD 2.0 2018 midpoint', 'human health', 'photochemical ozone creation')	'ATR BM, HT+LT, + CCS (MDEA), 90 (upper bound)' (megajoule, CH, None)	Emissions from fuel burning in furnace	2.49973e-05
('ILCD 2.0 2018 midpoint', 'human health', 'photochemical ozone creation')	'ATR BM, HT+LT, + CCS (MDEA), 90 (upper bound)' (megajoule, CH, None)	Fuel supply chain	3.26026e-05
('ILCD 2.0 2018 midpoint', 'human health', 'photochemical ozone creation')	'ATR BM, HT+LT, + CCS (MDEA), 90 (upper bound)' (megajoule, CH, None)	Plant infrastructure	2.97279e-06
('ILCD 2.0 2018 midpoint', 'human health', 'photochemical ozone creation')	'ATR BM, HT+LT, + CCS (MDEA), 90 (upper bound)' (megajoule, CH, None)	Water supply	7.74425e-08
('ILCD 2.0 2018 midpoint', 'human health', 'respiratory effects, inorganics')	'ATR BM, HT+LT, + CCS (MDEA), 90 (upper bound)' (megajoule, CH, None)	Catalysts&adsorbents	1.47362e-11
('ILCD 2.0 2018 midpoint', 'human health', 'respiratory effects, inorganics')	'ATR BM, HT+LT, + CCS (MDEA), 90 (upper bound)' (megajoule, CH, None)	CO2 transport and storage	5.07981e-12
('ILCD 2.0 2018 midpoint', 'human health', 'respiratory effects, inorganics')	'ATR BM, HT+LT, + CCS (MDEA), 90 (upper bound)' (megajoule, CH, None)	Direct CO2 emissions	0
('ILCD 2.0 2018 midpoint', 'human health', 'respiratory effects, inorganics')	'ATR BM, HT+LT, + CCS (MDEA), 90 (upper bound)' (megajoule, CH, None)	Electricity from/to grid	5.21031e-11
('ILCD 2.0 2018 midpoint', 'human health', 'respiratory effects, inorganics')	'ATR BM, HT+LT, + CCS (MDEA), 90 (upper bound)' (megajoule, CH, None)	Emissions from fuel burning in furnace	3.99956e-11
('ILCD 2.0 2018 midpoint', 'human health', 'respiratory effects, inorganics')	'ATR BM, HT+LT, + CCS (MDEA), 90 (upper bound)' (megajoule, CH, None)	Fuel supply chain	8.9363e-10
('ILCD 2.0 2018 midpoint', 'human health', 'respiratory effects, inorganics')	'ATR BM, HT+LT, + CCS (MDEA), 90 (upper bound)' (megajoule, CH, None)	Plant infrastructure	4.70314e-11
('ILCD 2.0 2018 midpoint', 'human health', 'respiratory effects, inorganics')	'ATR BM, HT+LT, + CCS (MDEA), 90 (upper bound)' (megajoule, CH, None)	Water supply	1.74323e-12
('ILCD 2.0 2018 midpoint', 'resources', 'fossils')	'ATR BM, HT+LT, + CCS (MDEA), 90 (upper bound)' (megajoule, CH, None)	Catalysts&adsorbents	0.00138009
('ILCD 2.0 2018 midpoint', 'resources', 'fossils')	'ATR BM, HT+LT, + CCS (MDEA), 90 (upper bound)' (megajoule, CH, None)	CO2 transport and storage	0.00605085
('ILCD 2.0 2018 midpoint', 'resources', 'fossils')	'ATR BM, HT+LT, + CCS (MDEA), 90 (upper bound)' (megajoule, CH, None)	Direct CO2 emissions	0
('ILCD 2.0 2018 midpoint', 'resources', 'fossils')	'ATR BM, HT+LT, + CCS (MDEA), 90 (upper bound)' (megajoule, CH, None)	Electricity from/to grid	0.0801295
('ILCD 2.0 2018 midpoint', 'resources', 'fossils')	'ATR BM, HT+LT, + CCS (MDEA), 90 (upper bound)' (megajoule, CH, None)	Emissions from fuel burning in furnace	0
('ILCD 2.0 2018 midpoint', 'resources', 'fossils')	'ATR BM, HT+LT, + CCS (MDEA), 90 (upper bound)' (megajoule, CH, None)	Fuel supply chain	0.158317
('ILCD 2.0 2018 midpoint', 'resources', 'fossils')	'ATR BM, HT+LT, + CCS (MDEA), 90 (upper bound)' (megajoule, CH, None)	Plant infrastructure	0.00956902
('ILCD 2.0 2018 midpoint', 'resources', 'fossils')	'ATR BM, HT+LT, + CCS (MDEA), 90 (upper bound)' (megajoule, CH, None)	Water supply	0.000352254
('ILCD 2.0 2018 midpoint', 'resources', 'land use')	'ATR BM, HT+LT, + CCS (MDEA), 90 (upper bound)' (megajoule, CH, None)	Catalysts&adsorbents	0.00114993
('ILCD 2.0 2018 midpoint', 'resources', 'land use')	'ATR BM, HT+LT, + CCS (MDEA), 90 (upper bound)' (megajoule, CH, None)	CO2 transport and storage	0.00247954
('ILCD 2.0 2018 midpoint', 'resources', 'land use')	'ATR BM, HT+LT, + CCS (MDEA), 90 (upper bound)' (megajoule, CH, None)	Direct CO2 emissions	0
('ILCD 2.0 2018 midpoint', 'resources', 'land use')	'ATR BM, HT+LT, + CCS (MDEA), 90 (upper bound)' (megajoule, CH, None)	Electricity from/to grid	0.0352151
('ILCD 2.0 2018 midpoint', 'resources', 'land use')	'ATR BM, HT+LT, + CCS (MDEA), 90 (upper bound)' (megajoule, CH, None)	Emissions from fuel burning in furnace	0
('ILCD 2.0 2018 midpoint', 'resources', 'land use')	'ATR BM, HT+LT, + CCS (MDEA), 90 (upper bound)' (megajoule, CH, None)	Fuel supply chain	0.14078
('ILCD 2.0 2018 midpoint', 'resources', 'land use')	'ATR BM, HT+LT, + CCS (MDEA), 90 (upper bound)' (megajoule, CH, None)	Plant infrastructure	0.0215588
('ILCD 2.0 2018 midpoint', 'resources', 'land use')	'ATR BM, HT+LT, + CCS (MDEA), 90 (upper bound)' (megajoule, CH, None)	Water supply	0.000178245
('ILCD 2.0 2018 midpoint', 'resources', 'minerals and metals')	'ATR BM, HT+LT, + CCS (MDEA), 90 (upper bound)' (megajoule, CH, None)	Catalysts&adsorbents	1.5601e-08
('ILCD 2.0 2018 midpoint', 'resources', 'minerals and metals')	'ATR BM, HT+LT, + CCS (MDEA), 90 (upper bound)' (megajoule, CH, None)	CO2 transport and storage	8.14624e-10
('ILCD 2.0 2018 midpoint', 'resources', 'minerals and metals')	'ATR BM, HT+LT, + CCS (MDEA), 90 (upper bound)' (megajoule, CH, None)	Direct CO2 emissions	0
('ILCD 2.0 2018 midpoint', 'resources', 'minerals and metals')	'ATR BM, HT+LT, + CCS (MDEA), 90 (upper bound)' (megajoule, CH, None)	Electricity from/to grid	7.99682e-09
('ILCD 2.0 2018 midpoint', 'resources', 'minerals and metals')	'ATR BM, HT+LT, + CCS (MDEA), 90 (upper bound)' (megajoule, CH, None)	Emissions from fuel burning in furnace	0
('ILCD 2.0 2018 midpoint', 'resources', 'minerals and metals')	'ATR BM, HT+LT, + CCS (MDEA), 90 (upper bound)' (megajoule, CH, None)	Fuel supply chain	1.24661e-06
('ILCD 2.0 2018 midpoint', 'resources', 'minerals and metals')	'ATR BM, HT+LT, + CCS (MDEA), 90 (upper bound)' (megajoule, CH, None)	Plant infrastructure	1.81183e-07
('ILCD 2.0 2018 midpoint', 'resources', 'minerals and metals')	'ATR BM, HT+LT, + CCS (MDEA), 90 (upper bound)' (megajoule, CH, None)	Water supply	6.76658e-10
('ReCiPe Midpoint (H) V1.13', 'metal depletion', 'MDP')	'ATR BM, HT+LT, + CCS (MDEA), 90 (upper bound)' (megajoule, CH, None)	Catalysts&adsorbents	0.00028353
('ReCiPe Midpoint (H) V1.13', 'metal depletion', 'MDP')	'ATR BM, HT+LT, + CCS (MDEA), 90 (upper bound)' (megajoule, CH, None)	CO2 transport and storage	3.58683e-06
('ReCiPe Midpoint (H) V1.13', 'metal depletion', 'MDP')	'ATR BM, HT+LT, + CCS (MDEA), 90 (upper bound)' (megajoule, CH, None)	Direct CO2 emissions	0
('ReCiPe Midpoint (H) V1.13', 'metal depletion', 'MDP')	'ATR BM, HT+LT, + CCS (MDEA), 90 (upper bound)' (megajoule, CH, None)	Electricity from/to grid	2.87212e-05
('ReCiPe Midpoint (H) V1.13', 'metal depletion', 'MDP')	'ATR BM, HT+LT, + CCS (MDEA), 90 (upper bound)' (megajoule, CH, None)	Emissions from fuel burning in furnace	0
('ReCiPe Midpoint (H) V1.13', 'metal depletion', 'MDP')	'ATR BM, HT+LT, + CCS (MDEA), 90 (upper bound)' (megajoule, CH, None)	Fuel supply chain	0.00318383
('ReCiPe Midpoint (H) V1.13', 'metal depletion', 'MDP')	'ATR BM, HT+LT, + CCS (MDEA), 90 (upper bound)' (megajoule, CH, None)	Plant infrastructure	0.000575174
('ReCiPe Midpoint (H) V1.13', 'metal depletion', 'MDP')	'ATR BM, HT+LT, + CCS (MDEA), 90 (upper bound)' (megajoule, CH, None)	Water supply	2.07628e-06
('cumulative energy demand', 'fossil', 'non-renewable energy resources, fossil')	'ATR BM, HT+LT, + CCS (MDEA), 98 (average)' (megajoule, CH, None)	Catalysts&adsorbents	0.00104087
('cumulative energy demand', 'fossil', 'non-renewable energy resources, fossil')	'ATR BM, HT+LT, + CCS (MDEA), 98 (average)' (megajoule, CH, None)	CO2 transport and storage	0.00347798
('cumulative energy demand', 'fossil', 'non-renewable energy resources, fossil')	'ATR BM, HT+LT, + CCS (MDEA), 98 (average)' (megajoule, CH, None)	Direct CO2 emissions	0
('cumulative energy demand', 'fossil', 'non-renewable energy resources, fossil')	'ATR BM, HT+LT, + CCS (MDEA), 98 (average)' (megajoule, CH, None)	Electricity from/to grid	0.0446003
('cumulative energy demand', 'fossil', 'non-renewable energy resources, fossil')	'ATR BM, HT+LT, + CCS (MDEA), 98 (average)' (megajoule, CH, None)	Emissions from fuel burning in furnace	0
('cumulative energy demand', 'fossil', 'non-renewable energy resources, fossil')	'ATR BM, HT+LT, + CCS (MDEA), 98 (average)' (megajoule, CH, None)	Fuel supply chain	0.116946
('cumulative energy demand', 'fossil', 'non-renewable energy resources, fossil')	'ATR BM, HT+LT, + CCS (MDEA), 98 (average)' (megajoule, CH, None)	Plant infrastructure	0.00693806
('cumulative energy demand', 'fossil', 'non-renewable energy resources, fossil')	'ATR BM, HT+LT, + CCS (MDEA), 98 (average)' (megajoule, CH, None)	Water supply	0.000277399
('cumulative energy demand', 'nuclear', 'non-renewable energy resources, nuclear')	'ATR BM, HT+LT, + CCS (MDEA), 98 (average)' (megajoule, CH, None)	Catalysts&adsorbents	8.69457e-05
('cumulative energy demand', 'nuclear', 'non-renewable energy resources, nuclear')	'ATR BM, HT+LT, + CCS (MDEA), 98 (average)' (megajoule, CH, None)	CO2 transport and storage	0.00263141
('cumulative energy demand', 'nuclear', 'non-renewable energy resources, nuclear')	'ATR BM, HT+LT, + CCS (MDEA), 98 (average)' (megajoule, CH, None)	Direct CO2 emissions	0
('cumulative energy demand', 'nuclear', 'non-renewable energy resources, nuclear')	'ATR BM, HT+LT, + CCS (MDEA), 98 (average)' (megajoule, CH, None)	Electricity from/to grid	0.0351935
('cumulative energy demand', 'nuclear', 'non-renewable energy resources, nuclear')	'ATR BM, HT+LT, + CCS (MDEA), 98 (average)' (megajoule, CH, None)	Emissions from fuel burning in furnace	0
('cumulative energy demand', 'nuclear', 'non-renewable energy resources, nuclear')	'ATR BM, HT+LT, + CCS (MDEA), 98 (average)' (megajoule, CH, None)	Fuel supply chain	0.0311952
('cumulative energy demand', 'nuclear', 'non-renewable energy resources, nuclear')	'ATR BM, HT+LT, + CCS (MDEA), 98 (average)' (megajoule, CH, None)	Plant infrastructure	0.00171998
('cumulative energy demand', 'nuclear', 'non-renewable energy resources, nuclear')	'ATR BM, HT+LT, + CCS (MDEA), 98 (average)' (megajoule, CH, None)	Water supply	5.86471e-05
('cumulative energy demand', 'primary forest', 'non-renewable energy resources, primary forest')	'ATR BM, HT+LT, + CCS (MDEA), 98 (average)' (megajoule, CH, None)	Catalysts&adsorbents	2.14448e-08
('cumulative energy demand', 'primary forest', 'non-renewable energy resources, primary forest')	'ATR BM, HT+LT, + CCS (MDEA), 98 (average)' (megajoule, CH, None)	CO2 transport and storage	5.12046e-08
('cumulative energy demand', 'primary forest', 'non-renewable energy resources, primary forest')	'ATR BM, HT+LT, + CCS (MDEA), 98 (average)' (megajoule, CH, None)	Direct CO2 emissions	0
('cumulative energy demand', 'primary forest', 'non-renewable energy resources, primary forest')	'ATR BM, HT+LT, + CCS (MDEA), 98 (average)' (megajoule, CH, None)	Electricity from/to grid	3.10393e-07
('cumulative energy demand', 'primary forest', 'non-renewable energy resources, primary forest')	'ATR BM, HT+LT, + CCS (MDEA), 98 (average)' (megajoule, CH, None)	Emissions from fuel burning in furnace	0
('cumulative energy demand', 'primary forest', 'non-renewable energy resources, primary forest')	'ATR BM, HT+LT, + CCS (MDEA), 98 (average)' (megajoule, CH, None)	Fuel supply chain	2.08208e-06
('cumulative energy demand', 'primary forest', 'non-renewable energy resources, primary forest')	'ATR BM, HT+LT, + CCS (MDEA), 98 (average)' (megajoule, CH, None)	Plant infrastructure	3.70972e-07
('cumulative energy demand', 'primary forest', 'non-renewable energy resources, primary forest')	'ATR BM, HT+LT, + CCS (MDEA), 98 (average)' (megajoule, CH, None)	Water supply	4.68063e-09
('ILCD 2.0 2018 midpoint', 'climate change', 'climate change total')	'ATR BM, HT+LT, + CCS (MDEA), 98 (average)' (megajoule, CH, None)	Catalysts&adsorbents	9.12173e-05
('ILCD 2.0 2018 midpoint', 'climate change', 'climate change total')	'ATR BM, HT+LT, + CCS (MDEA), 98 (average)' (megajoule, CH, None)	CO2 transport and storage	0.000286444
('ILCD 2.0 2018 midpoint', 'climate change', 'climate change total')	'ATR BM, HT+LT, + CCS (MDEA), 98 (average)' (megajoule, CH, None)	Direct CO2 emissions	0.0047197
('ILCD 2.0 2018 midpoint', 'climate change', 'climate change total')	'ATR BM, HT+LT, + CCS (MDEA), 98 (average)' (megajoule, CH, None)	Electricity from/to grid	0.00369263
('ILCD 2.0 2018 midpoint', 'climate change', 'climate change total')	'ATR BM, HT+LT, + CCS (MDEA), 98 (average)' (megajoule, CH, None)	Emissions from fuel burning in furnace	0
('ILCD 2.0 2018 midpoint', 'climate change', 'climate change total')	'ATR BM, HT+LT, + CCS (MDEA), 98 (average)' (megajoule, CH, None)	Fuel supply chain	-0.100381
('ILCD 2.0 2018 midpoint', 'climate change', 'climate change total')	'ATR BM, HT+LT, + CCS (MDEA), 98 (average)' (megajoule, CH, None)	Plant infrastructure	0.000631279
('ILCD 2.0 2018 midpoint', 'climate change', 'climate change total')	'ATR BM, HT+LT, + CCS (MDEA), 98 (average)' (megajoule, CH, None)	Water supply	2.27993e-05
('ILCD 2.0 2018 midpoint', 'ecosystem quality', 'freshwater and terrestrial acidification')	'ATR BM, HT+LT, + CCS (MDEA), 98 (average)' (megajoule, CH, None)	Catalysts&adsorbents	7.85337e-06
('ILCD 2.0 2018 midpoint', 'ecosystem quality', 'freshwater and terrestrial acidification')	'ATR BM, HT+LT, + CCS (MDEA), 98 (average)' (megajoule, CH, None)	CO2 transport and storage	1.60359e-06
('ILCD 2.0 2018 midpoint', 'ecosystem quality', 'freshwater and terrestrial acidification')	'ATR BM, HT+LT, + CCS (MDEA), 98 (average)' (megajoule, CH, None)	Direct CO2 emissions	0
('ILCD 2.0 2018 midpoint', 'ecosystem quality', 'freshwater and terrestrial acidification')	'ATR BM, HT+LT, + CCS (MDEA), 98 (average)' (megajoule, CH, None)	Electricity from/to grid	1.91036e-05
('ILCD 2.0 2018 midpoint', 'ecosystem quality', 'freshwater and terrestrial acidification')	'ATR BM, HT+LT, + CCS (MDEA), 98 (average)' (megajoule, CH, None)	Emissions from fuel burning in furnace	1.8498e-05
('ILCD 2.0 2018 midpoint', 'ecosystem quality', 'freshwater and terrestrial acidification')	'ATR BM, HT+LT, + CCS (MDEA), 98 (average)' (megajoule, CH, None)	Fuel supply chain	0.000125075
('ILCD 2.0 2018 midpoint', 'ecosystem quality', 'freshwater and terrestrial acidification')	'ATR BM, HT+LT, + CCS (MDEA), 98 (average)' (megajoule, CH, None)	Plant infrastructure	7.89891e-06
('ILCD 2.0 2018 midpoint', 'ecosystem quality', 'freshwater and terrestrial acidification')	'ATR BM, HT+LT, + CCS (MDEA), 98 (average)' (megajoule, CH, None)	Water supply	2.47425e-07
('ILCD 2.0 2018 midpoint', 'ecosystem quality', 'freshwater ecotoxicity')	'ATR BM, HT+LT, + CCS (MDEA), 98 (average)' (megajoule, CH, None)	Catalysts&adsorbents	0.000628182
('ILCD 2.0 2018 midpoint', 'ecosystem quality', 'freshwater ecotoxicity')	'ATR BM, HT+LT, + CCS (MDEA), 98 (average)' (megajoule, CH, None)	CO2 transport and storage	9.69729e-05
('ILCD 2.0 2018 midpoint', 'ecosystem quality', 'freshwater ecotoxicity')	'ATR BM, HT+LT, + CCS (MDEA), 98 (average)' (megajoule, CH, None)	Direct CO2 emissions	0
('ILCD 2.0 2018 midpoint', 'ecosystem quality', 'freshwater ecotoxicity')	'ATR BM, HT+LT, + CCS (MDEA), 98 (average)' (megajoule, CH, None)	Electricity from/to grid	0.000929946
('ILCD 2.0 2018 midpoint', 'ecosystem quality', 'freshwater ecotoxicity')	'ATR BM, HT+LT, + CCS (MDEA), 98 (average)' (megajoule, CH, None)	Emissions from fuel burning in furnace	0
('ILCD 2.0 2018 midpoint', 'ecosystem quality', 'freshwater ecotoxicity')	'ATR BM, HT+LT, + CCS (MDEA), 98 (average)' (megajoule, CH, None)	Fuel supply chain	0.0123108
('ILCD 2.0 2018 midpoint', 'ecosystem quality', 'freshwater ecotoxicity')	'ATR BM, HT+LT, + CCS (MDEA), 98 (average)' (megajoule, CH, None)	Plant infrastructure	0.00217871
('ILCD 2.0 2018 midpoint', 'ecosystem quality', 'freshwater ecotoxicity')	'ATR BM, HT+LT, + CCS (MDEA), 98 (average)' (megajoule, CH, None)	Water supply	3.76329e-05
('ILCD 2.0 2018 midpoint', 'ecosystem quality', 'marine eutrophication')	'ATR BM, HT+LT, + CCS (MDEA), 98 (average)' (megajoule, CH, None)	Catalysts&adsorbents	2.43506e-07
('ILCD 2.0 2018 midpoint', 'ecosystem quality', 'marine eutrophication')	'ATR BM, HT+LT, + CCS (MDEA), 98 (average)' (megajoule, CH, None)	CO2 transport and storage	2.91682e-07
('ILCD 2.0 2018 midpoint', 'ecosystem quality', 'marine eutrophication')	'ATR BM, HT+LT, + CCS (MDEA), 98 (average)' (megajoule, CH, None)	Direct CO2 emissions	0
('ILCD 2.0 2018 midpoint', 'ecosystem quality', 'marine eutrophication')	'ATR BM, HT+LT, + CCS (MDEA), 98 (average)' (megajoule, CH, None)	Electricity from/to grid	3.30132e-06
('ILCD 2.0 2018 midpoint', 'ecosystem quality', 'marine eutrophication')	'ATR BM, HT+LT, + CCS (MDEA), 98 (average)' (megajoule, CH, None)	Emissions from fuel burning in furnace	9.72394e-06
('ILCD 2.0 2018 midpoint', 'ecosystem quality', 'marine eutrophication')	'ATR BM, HT+LT, + CCS (MDEA), 98 (average)' (megajoule, CH, None)	Fuel supply chain	1.03927e-05
('ILCD 2.0 2018 midpoint', 'ecosystem quality', 'marine eutrophication')	'ATR BM, HT+LT, + CCS (MDEA), 98 (average)' (megajoule, CH, None)	Plant infrastructure	8.8364e-07
('ILCD 2.0 2018 midpoint', 'ecosystem quality', 'marine eutrophication')	'ATR BM, HT+LT, + CCS (MDEA), 98 (average)' (megajoule, CH, None)	Water supply	2.40939e-08
('ILCD 2.0 2018 midpoint', 'ecosystem quality', 'terrestrial eutrophication')	'ATR BM, HT+LT, + CCS (MDEA), 98 (average)' (megajoule, CH, None)	Catalysts&adsorbents	3.26269e-06
('ILCD 2.0 2018 midpoint', 'ecosystem quality', 'terrestrial eutrophication')	'ATR BM, HT+LT, + CCS (MDEA), 98 (average)' (megajoule, CH, None)	CO2 transport and storage	2.79166e-06
('ILCD 2.0 2018 midpoint', 'ecosystem quality', 'terrestrial eutrophication')	'ATR BM, HT+LT, + CCS (MDEA), 98 (average)' (megajoule, CH, None)	Direct CO2 emissions	0
('ILCD 2.0 2018 midpoint', 'ecosystem quality', 'terrestrial eutrophication')	'ATR BM, HT+LT, + CCS (MDEA), 98 (average)' (megajoule, CH, None)	Electricity from/to grid	3.06515e-05
('ILCD 2.0 2018 midpoint', 'ecosystem quality', 'terrestrial eutrophication')	'ATR BM, HT+LT, + CCS (MDEA), 98 (average)' (megajoule, CH, None)	Emissions from fuel burning in furnace	0.000106488
('ILCD 2.0 2018 midpoint', 'ecosystem quality', 'terrestrial eutrophication')	'ATR BM, HT+LT, + CCS (MDEA), 98 (average)' (megajoule, CH, None)	Fuel supply chain	0.000183954
('ILCD 2.0 2018 midpoint', 'ecosystem quality', 'terrestrial eutrophication')	'ATR BM, HT+LT, + CCS (MDEA), 98 (average)' (megajoule, CH, None)	Plant infrastructure	1.03808e-05
('ILCD 2.0 2018 midpoint', 'ecosystem quality', 'terrestrial eutrophication')	'ATR BM, HT+LT, + CCS (MDEA), 98 (average)' (megajoule, CH, None)	Water supply	2.44598e-07
('ILCD 2.0 2018 midpoint', 'human health', 'carcinogenic effects')	'ATR BM, HT+LT, + CCS (MDEA), 98 (average)' (megajoule, CH, None)	Catalysts&adsorbents	2.32399e-11
('ILCD 2.0 2018 midpoint', 'human health', 'carcinogenic effects')	'ATR BM, HT+LT, + CCS (MDEA), 98 (average)' (megajoule, CH, None)	CO2 transport and storage	3.69164e-12
('ILCD 2.0 2018 midpoint', 'human health', 'carcinogenic effects')	'ATR BM, HT+LT, + CCS (MDEA), 98 (average)' (megajoule, CH, None)	Direct CO2 emissions	0
('ILCD 2.0 2018 midpoint', 'human health', 'carcinogenic effects')	'ATR BM, HT+LT, + CCS (MDEA), 98 (average)' (megajoule, CH, None)	Electricity from/to grid	2.53154e-11
('ILCD 2.0 2018 midpoint', 'human health', 'carcinogenic effects')	'ATR BM, HT+LT, + CCS (MDEA), 98 (average)' (megajoule, CH, None)	Emissions from fuel burning in furnace	0
('ILCD 2.0 2018 midpoint', 'human health', 'carcinogenic effects')	'ATR BM, HT+LT, + CCS (MDEA), 98 (average)' (megajoule, CH, None)	Fuel supply chain	3.46697e-10
('ILCD 2.0 2018 midpoint', 'human health', 'carcinogenic effects')	'ATR BM, HT+LT, + CCS (MDEA), 98 (average)' (megajoule, CH, None)	Plant infrastructure	7.30488e-11
('ILCD 2.0 2018 midpoint', 'human health', 'carcinogenic effects')	'ATR BM, HT+LT, + CCS (MDEA), 98 (average)' (megajoule, CH, None)	Water supply	9.08745e-13
('ILCD 2.0 2018 midpoint', 'human health', 'ionising radiation')	'ATR BM, HT+LT, + CCS (MDEA), 98 (average)' (megajoule, CH, None)	Catalysts&adsorbents	6.50284e-06
('ILCD 2.0 2018 midpoint', 'human health', 'ionising radiation')	'ATR BM, HT+LT, + CCS (MDEA), 98 (average)' (megajoule, CH, None)	CO2 transport and storage	0.000152354
('ILCD 2.0 2018 midpoint', 'human health', 'ionising radiation')	'ATR BM, HT+LT, + CCS (MDEA), 98 (average)' (megajoule, CH, None)	Direct CO2 emissions	0
('ILCD 2.0 2018 midpoint', 'human health', 'ionising radiation')	'ATR BM, HT+LT, + CCS (MDEA), 98 (average)' (megajoule, CH, None)	Electricity from/to grid	0.00204104
('ILCD 2.0 2018 midpoint', 'human health', 'ionising radiation')	'ATR BM, HT+LT, + CCS (MDEA), 98 (average)' (megajoule, CH, None)	Emissions from fuel burning in furnace	0
('ILCD 2.0 2018 midpoint', 'human health', 'ionising radiation')	'ATR BM, HT+LT, + CCS (MDEA), 98 (average)' (megajoule, CH, None)	Fuel supply chain	0.00206
('ILCD 2.0 2018 midpoint', 'human health', 'ionising radiation')	'ATR BM, HT+LT, + CCS (MDEA), 98 (average)' (megajoule, CH, None)	Plant infrastructure	0.000106411
('ILCD 2.0 2018 midpoint', 'human health', 'ionising radiation')	'ATR BM, HT+LT, + CCS (MDEA), 98 (average)' (megajoule, CH, None)	Water supply	3.82124e-06
('ILCD 2.0 2018 midpoint', 'human health', 'non-carcinogenic effects')	'ATR BM, HT+LT, + CCS (MDEA), 98 (average)' (megajoule, CH, None)	Catalysts&adsorbents	1.68319e-10
('ILCD 2.0 2018 midpoint', 'human health', 'non-carcinogenic effects')	'ATR BM, HT+LT, + CCS (MDEA), 98 (average)' (megajoule, CH, None)	CO2 transport and storage	3.21761e-11
('ILCD 2.0 2018 midpoint', 'human health', 'non-carcinogenic effects')	'ATR BM, HT+LT, + CCS (MDEA), 98 (average)' (megajoule, CH, None)	Direct CO2 emissions	0
('ILCD 2.0 2018 midpoint', 'human health', 'non-carcinogenic effects')	'ATR BM, HT+LT, + CCS (MDEA), 98 (average)' (megajoule, CH, None)	Electricity from/to grid	3.66868e-10
('ILCD 2.0 2018 midpoint', 'human health', 'non-carcinogenic effects')	'ATR BM, HT+LT, + CCS (MDEA), 98 (average)' (megajoule, CH, None)	Emissions from fuel burning in furnace	0
('ILCD 2.0 2018 midpoint', 'human health', 'non-carcinogenic effects')	'ATR BM, HT+LT, + CCS (MDEA), 98 (average)' (megajoule, CH, None)	Fuel supply chain	3.21407e-09
('ILCD 2.0 2018 midpoint', 'human health', 'non-carcinogenic effects')	'ATR BM, HT+LT, + CCS (MDEA), 98 (average)' (megajoule, CH, None)	Plant infrastructure	5.72601e-10
('ILCD 2.0 2018 midpoint', 'human health', 'non-carcinogenic effects')	'ATR BM, HT+LT, + CCS (MDEA), 98 (average)' (megajoule, CH, None)	Water supply	6.85547e-12
('ILCD 2.0 2018 midpoint', 'human health', 'ozone layer depletion')	'ATR BM, HT+LT, + CCS (MDEA), 98 (average)' (megajoule, CH, None)	Catalysts&adsorbents	1.38511e-11
('ILCD 2.0 2018 midpoint', 'human health', 'ozone layer depletion')	'ATR BM, HT+LT, + CCS (MDEA), 98 (average)' (megajoule, CH, None)	CO2 transport and storage	2.47261e-11
('ILCD 2.0 2018 midpoint', 'human health', 'ozone layer depletion')	'ATR BM, HT+LT, + CCS (MDEA), 98 (average)' (megajoule, CH, None)	Direct CO2 emissions	0
('ILCD 2.0 2018 midpoint', 'human health', 'ozone layer depletion')	'ATR BM, HT+LT, + CCS (MDEA), 98 (average)' (megajoule, CH, None)	Electricity from/to grid	3.16155e-10
('ILCD 2.0 2018 midpoint', 'human health', 'ozone layer depletion')	'ATR BM, HT+LT, + CCS (MDEA), 98 (average)' (megajoule, CH, None)	Emissions from fuel burning in furnace	0
('ILCD 2.0 2018 midpoint', 'human health', 'ozone layer depletion')	'ATR BM, HT+LT, + CCS (MDEA), 98 (average)' (megajoule, CH, None)	Fuel supply chain	9.73203e-10
('ILCD 2.0 2018 midpoint', 'human health', 'ozone layer depletion')	'ATR BM, HT+LT, + CCS (MDEA), 98 (average)' (megajoule, CH, None)	Plant infrastructure	4.70935e-11
('ILCD 2.0 2018 midpoint', 'human health', 'ozone layer depletion')	'ATR BM, HT+LT, + CCS (MDEA), 98 (average)' (megajoule, CH, None)	Water supply	1.53782e-11
('ILCD 2.0 2018 midpoint', 'human health', 'photochemical ozone creation')	'ATR BM, HT+LT, + CCS (MDEA), 98 (average)' (megajoule, CH, None)	Catalysts&adsorbents	1.11653e-06
('ILCD 2.0 2018 midpoint', 'human health', 'photochemical ozone creation')	'ATR BM, HT+LT, + CCS (MDEA), 98 (average)' (megajoule, CH, None)	CO2 transport and storage	7.16988e-07
('ILCD 2.0 2018 midpoint', 'human health', 'photochemical ozone creation')	'ATR BM, HT+LT, + CCS (MDEA), 98 (average)' (megajoule, CH, None)	Direct CO2 emissions	0
('ILCD 2.0 2018 midpoint', 'human health', 'photochemical ozone creation')	'ATR BM, HT+LT, + CCS (MDEA), 98 (average)' (megajoule, CH, None)	Electricity from/to grid	7.60143e-06
('ILCD 2.0 2018 midpoint', 'human health', 'photochemical ozone creation')	'ATR BM, HT+LT, + CCS (MDEA), 98 (average)' (megajoule, CH, None)	Emissions from fuel burning in furnace	2.49973e-05
('ILCD 2.0 2018 midpoint', 'human health', 'photochemical ozone creation')	'ATR BM, HT+LT, + CCS (MDEA), 98 (average)' (megajoule, CH, None)	Fuel supply chain	3.26026e-05
('ILCD 2.0 2018 midpoint', 'human health', 'photochemical ozone creation')	'ATR BM, HT+LT, + CCS (MDEA), 98 (average)' (megajoule, CH, None)	Plant infrastructure	2.97279e-06
('ILCD 2.0 2018 midpoint', 'human health', 'photochemical ozone creation')	'ATR BM, HT+LT, + CCS (MDEA), 98 (average)' (megajoule, CH, None)	Water supply	7.74425e-08
('ILCD 2.0 2018 midpoint', 'human health', 'respiratory effects, inorganics')	'ATR BM, HT+LT, + CCS (MDEA), 98 (average)' (megajoule, CH, None)	Catalysts&adsorbents	1.45044e-11
('ILCD 2.0 2018 midpoint', 'human health', 'respiratory effects, inorganics')	'ATR BM, HT+LT, + CCS (MDEA), 98 (average)' (megajoule, CH, None)	CO2 transport and storage	5.53135e-12
('ILCD 2.0 2018 midpoint', 'human health', 'respiratory effects, inorganics')	'ATR BM, HT+LT, + CCS (MDEA), 98 (average)' (megajoule, CH, None)	Direct CO2 emissions	0
('ILCD 2.0 2018 midpoint', 'human health', 'respiratory effects, inorganics')	'ATR BM, HT+LT, + CCS (MDEA), 98 (average)' (megajoule, CH, None)	Electricity from/to grid	5.59012e-11
('ILCD 2.0 2018 midpoint', 'human health', 'respiratory effects, inorganics')	'ATR BM, HT+LT, + CCS (MDEA), 98 (average)' (megajoule, CH, None)	Emissions from fuel burning in furnace	3.99956e-11
('ILCD 2.0 2018 midpoint', 'human health', 'respiratory effects, inorganics')	'ATR BM, HT+LT, + CCS (MDEA), 98 (average)' (megajoule, CH, None)	Fuel supply chain	8.9363e-10
('ILCD 2.0 2018 midpoint', 'human health', 'respiratory effects, inorganics')	'ATR BM, HT+LT, + CCS (MDEA), 98 (average)' (megajoule, CH, None)	Plant infrastructure	4.70314e-11
('ILCD 2.0 2018 midpoint', 'human health', 'respiratory effects, inorganics')	'ATR BM, HT+LT, + CCS (MDEA), 98 (average)' (megajoule, CH, None)	Water supply	1.74323e-12
('ILCD 2.0 2018 midpoint', 'resources', 'fossils')	'ATR BM, HT+LT, + CCS (MDEA), 98 (average)' (megajoule, CH, None)	Catalysts&adsorbents	0.00122557
('ILCD 2.0 2018 midpoint', 'resources', 'fossils')	'ATR BM, HT+LT, + CCS (MDEA), 98 (average)' (megajoule, CH, None)	CO2 transport and storage	0.0065887
('ILCD 2.0 2018 midpoint', 'resources', 'fossils')	'ATR BM, HT+LT, + CCS (MDEA), 98 (average)' (megajoule, CH, None)	Direct CO2 emissions	0
('ILCD 2.0 2018 midpoint', 'resources', 'fossils')	'ATR BM, HT+LT, + CCS (MDEA), 98 (average)' (megajoule, CH, None)	Electricity from/to grid	0.0859705
('ILCD 2.0 2018 midpoint', 'resources', 'fossils')	'ATR BM, HT+LT, + CCS (MDEA), 98 (average)' (megajoule, CH, None)	Emissions from fuel burning in furnace	0
('ILCD 2.0 2018 midpoint', 'resources', 'fossils')	'ATR BM, HT+LT, + CCS (MDEA), 98 (average)' (megajoule, CH, None)	Fuel supply chain	0.158317
('ILCD 2.0 2018 midpoint', 'resources', 'fossils')	'ATR BM, HT+LT, + CCS (MDEA), 98 (average)' (megajoule, CH, None)	Plant infrastructure	0.00956902
('ILCD 2.0 2018 midpoint', 'resources', 'fossils')	'ATR BM, HT+LT, + CCS (MDEA), 98 (average)' (megajoule, CH, None)	Water supply	0.000352254
('ILCD 2.0 2018 midpoint', 'resources', 'land use')	'ATR BM, HT+LT, + CCS (MDEA), 98 (average)' (megajoule, CH, None)	Catalysts&adsorbents	0.00112991
('ILCD 2.0 2018 midpoint', 'resources', 'land use')	'ATR BM, HT+LT, + CCS (MDEA), 98 (average)' (megajoule, CH, None)	CO2 transport and storage	0.00269994
('ILCD 2.0 2018 midpoint', 'resources', 'land use')	'ATR BM, HT+LT, + CCS (MDEA), 98 (average)' (megajoule, CH, None)	Direct CO2 emissions	0
('ILCD 2.0 2018 midpoint', 'resources', 'land use')	'ATR BM, HT+LT, + CCS (MDEA), 98 (average)' (megajoule, CH, None)	Electricity from/to grid	0.0377822
('ILCD 2.0 2018 midpoint', 'resources', 'land use')	'ATR BM, HT+LT, + CCS (MDEA), 98 (average)' (megajoule, CH, None)	Emissions from fuel burning in furnace	0
('ILCD 2.0 2018 midpoint', 'resources', 'land use')	'ATR BM, HT+LT, + CCS (MDEA), 98 (average)' (megajoule, CH, None)	Fuel supply chain	0.14078
('ILCD 2.0 2018 midpoint', 'resources', 'land use')	'ATR BM, HT+LT, + CCS (MDEA), 98 (average)' (megajoule, CH, None)	Plant infrastructure	0.0215588
('ILCD 2.0 2018 midpoint', 'resources', 'land use')	'ATR BM, HT+LT, + CCS (MDEA), 98 (average)' (megajoule, CH, None)	Water supply	0.000178245
('ILCD 2.0 2018 midpoint', 'resources', 'minerals and metals')	'ATR BM, HT+LT, + CCS (MDEA), 98 (average)' (megajoule, CH, None)	Catalysts&adsorbents	1.55187e-08
('ILCD 2.0 2018 midpoint', 'resources', 'minerals and metals')	'ATR BM, HT+LT, + CCS (MDEA), 98 (average)' (megajoule, CH, None)	CO2 transport and storage	8.87035e-10
('ILCD 2.0 2018 midpoint', 'resources', 'minerals and metals')	'ATR BM, HT+LT, + CCS (MDEA), 98 (average)' (megajoule, CH, None)	Direct CO2 emissions	0
('ILCD 2.0 2018 midpoint', 'resources', 'minerals and metals')	'ATR BM, HT+LT, + CCS (MDEA), 98 (average)' (megajoule, CH, None)	Electricity from/to grid	8.57976e-09
('ILCD 2.0 2018 midpoint', 'resources', 'minerals and metals')	'ATR BM, HT+LT, + CCS (MDEA), 98 (average)' (megajoule, CH, None)	Emissions from fuel burning in furnace	0
('ILCD 2.0 2018 midpoint', 'resources', 'minerals and metals')	'ATR BM, HT+LT, + CCS (MDEA), 98 (average)' (megajoule, CH, None)	Fuel supply chain	1.24661e-06
('ILCD 2.0 2018 midpoint', 'resources', 'minerals and metals')	'ATR BM, HT+LT, + CCS (MDEA), 98 (average)' (megajoule, CH, None)	Plant infrastructure	1.81183e-07
('ILCD 2.0 2018 midpoint', 'resources', 'minerals and metals')	'ATR BM, HT+LT, + CCS (MDEA), 98 (average)' (megajoule, CH, None)	Water supply	6.76658e-10
('ReCiPe Midpoint (H) V1.13', 'metal depletion', 'MDP')	'ATR BM, HT+LT, + CCS (MDEA), 98 (average)' (megajoule, CH, None)	Catalysts&adsorbents	0.00028327
('ReCiPe Midpoint (H) V1.13', 'metal depletion', 'MDP')	'ATR BM, HT+LT, + CCS (MDEA), 98 (average)' (megajoule, CH, None)	CO2 transport and storage	3.90566e-06
('ReCiPe Midpoint (H) V1.13', 'metal depletion', 'MDP')	'ATR BM, HT+LT, + CCS (MDEA), 98 (average)' (megajoule, CH, None)	Direct CO2 emissions	0
('ReCiPe Midpoint (H) V1.13', 'metal depletion', 'MDP')	'ATR BM, HT+LT, + CCS (MDEA), 98 (average)' (megajoule, CH, None)	Electricity from/to grid	3.08149e-05
('ReCiPe Midpoint (H) V1.13', 'metal depletion', 'MDP')	'ATR BM, HT+LT, + CCS (MDEA), 98 (average)' (megajoule, CH, None)	Emissions from fuel burning in furnace	0
('ReCiPe Midpoint (H) V1.13', 'metal depletion', 'MDP')	'ATR BM, HT+LT, + CCS (MDEA), 98 (average)' (megajoule, CH, None)	Fuel supply chain	0.00318383
('ReCiPe Midpoint (H) V1.13', 'metal depletion', 'MDP')	'ATR BM, HT+LT, + CCS (MDEA), 98 (average)' (megajoule, CH, None)	Plant infrastructure	0.000575174
('ReCiPe Midpoint (H) V1.13', 'metal depletion', 'MDP')	'ATR BM, HT+LT, + CCS (MDEA), 98 (average)' (megajoule, CH, None)	Water supply	2.07628e-06
('cumulative energy demand', 'fossil', 'non-renewable energy resources, fossil')	'ATR BM, HT+LT, + CCS (MDEA), 98 (average), maximum C uptake' (megajoule, CH, None)	Catalysts&adsorbents	0.00104087
('cumulative energy demand', 'fossil', 'non-renewable energy resources, fossil')	'ATR BM, HT+LT, + CCS (MDEA), 98 (average), maximum C uptake' (megajoule, CH, None)	CO2 transport and storage	0.00347798
('cumulative energy demand', 'fossil', 'non-renewable energy resources, fossil')	'ATR BM, HT+LT, + CCS (MDEA), 98 (average), maximum C uptake' (megajoule, CH, None)	Direct CO2 emissions	0
('cumulative energy demand', 'fossil', 'non-renewable energy resources, fossil')	'ATR BM, HT+LT, + CCS (MDEA), 98 (average), maximum C uptake' (megajoule, CH, None)	Electricity from/to grid	0.0446003
('cumulative energy demand', 'fossil', 'non-renewable energy resources, fossil')	'ATR BM, HT+LT, + CCS (MDEA), 98 (average), maximum C uptake' (megajoule, CH, None)	Emissions from fuel burning in furnace	0
('cumulative energy demand', 'fossil', 'non-renewable energy resources, fossil')	'ATR BM, HT+LT, + CCS (MDEA), 98 (average), maximum C uptake' (megajoule, CH, None)	Fuel supply chain	0.116946
('cumulative energy demand', 'fossil', 'non-renewable energy resources, fossil')	'ATR BM, HT+LT, + CCS (MDEA), 98 (average), maximum C uptake' (megajoule, CH, None)	Plant infrastructure	0.00693806
('cumulative energy demand', 'fossil', 'non-renewable energy resources, fossil')	'ATR BM, HT+LT, + CCS (MDEA), 98 (average), maximum C uptake' (megajoule, CH, None)	Water supply	0.000277399
('cumulative energy demand', 'nuclear', 'non-renewable energy resources, nuclear')	'ATR BM, HT+LT, + CCS (MDEA), 98 (average), maximum C uptake' (megajoule, CH, None)	Catalysts&adsorbents	8.69457e-05
('cumulative energy demand', 'nuclear', 'non-renewable energy resources, nuclear')	'ATR BM, HT+LT, + CCS (MDEA), 98 (average), maximum C uptake' (megajoule, CH, None)	CO2 transport and storage	0.00263141
('cumulative energy demand', 'nuclear', 'non-renewable energy resources, nuclear')	'ATR BM, HT+LT, + CCS (MDEA), 98 (average), maximum C uptake' (megajoule, CH, None)	Direct CO2 emissions	0
('cumulative energy demand', 'nuclear', 'non-renewable energy resources, nuclear')	'ATR BM, HT+LT, + CCS (MDEA), 98 (average), maximum C uptake' (megajoule, CH, None)	Electricity from/to grid	0.0351935
('cumulative energy demand', 'nuclear', 'non-renewable energy resources, nuclear')	'ATR BM, HT+LT, + CCS (MDEA), 98 (average), maximum C uptake' (megajoule, CH, None)	Emissions from fuel burning in furnace	0
('cumulative energy demand', 'nuclear', 'non-renewable energy resources, nuclear')	'ATR BM, HT+LT, + CCS (MDEA), 98 (average), maximum C uptake' (megajoule, CH, None)	Fuel supply chain	0.0311952
('cumulative energy demand', 'nuclear', 'non-renewable energy resources, nuclear')	'ATR BM, HT+LT, + CCS (MDEA), 98 (average), maximum C uptake' (megajoule, CH, None)	Plant infrastructure	0.00171998
('cumulative energy demand', 'nuclear', 'non-renewable energy resources, nuclear')	'ATR BM, HT+LT, + CCS (MDEA), 98 (average), maximum C uptake' (megajoule, CH, None)	Water supply	5.86471e-05
('cumulative energy demand', 'primary forest', 'non-renewable energy resources, primary forest')	'ATR BM, HT+LT, + CCS (MDEA), 98 (average), maximum C uptake' (megajoule, CH, None)	Catalysts&adsorbents	2.14448e-08
('cumulative energy demand', 'primary forest', 'non-renewable energy resources, primary forest')	'ATR BM, HT+LT, + CCS (MDEA), 98 (average), maximum C uptake' (megajoule, CH, None)	CO2 transport and storage	5.12046e-08
('cumulative energy demand', 'primary forest', 'non-renewable energy resources, primary forest')	'ATR BM, HT+LT, + CCS (MDEA), 98 (average), maximum C uptake' (megajoule, CH, None)	Direct CO2 emissions	0
('cumulative energy demand', 'primary forest', 'non-renewable energy resources, primary forest')	'ATR BM, HT+LT, + CCS (MDEA), 98 (average), maximum C uptake' (megajoule, CH, None)	Electricity from/to grid	3.10393e-07
('cumulative energy demand', 'primary forest', 'non-renewable energy resources, primary forest')	'ATR BM, HT+LT, + CCS (MDEA), 98 (average), maximum C uptake' (megajoule, CH, None)	Emissions from fuel burning in furnace	0
('cumulative energy demand', 'primary forest', 'non-renewable energy resources, primary forest')	'ATR BM, HT+LT, + CCS (MDEA), 98 (average), maximum C uptake' (megajoule, CH, None)	Fuel supply chain	2.08208e-06
('cumulative energy demand', 'primary forest', 'non-renewable energy resources, primary forest')	'ATR BM, HT+LT, + CCS (MDEA), 98 (average), maximum C uptake' (megajoule, CH, None)	Plant infrastructure	3.70972e-07
('cumulative energy demand', 'primary forest', 'non-renewable energy resources, primary forest')	'ATR BM, HT+LT, + CCS (MDEA), 98 (average), maximum C uptake' (megajoule, CH, None)	Water supply	4.68063e-09
('ILCD 2.0 2018 midpoint', 'climate change', 'climate change total')	'ATR BM, HT+LT, + CCS (MDEA), 98 (average), maximum C uptake' (megajoule, CH, None)	Catalysts&adsorbents	9.12173e-05
('ILCD 2.0 2018 midpoint', 'climate change', 'climate change total')	'ATR BM, HT+LT, + CCS (MDEA), 98 (average), maximum C uptake' (megajoule, CH, None)	CO2 transport and storage	0.000286444
('ILCD 2.0 2018 midpoint', 'climate change', 'climate change total')	'ATR BM, HT+LT, + CCS (MDEA), 98 (average), maximum C uptake' (megajoule, CH, None)	Direct CO2 emissions	0.0047197
('ILCD 2.0 2018 midpoint', 'climate change', 'climate change total')	'ATR BM, HT+LT, + CCS (MDEA), 98 (average), maximum C uptake' (megajoule, CH, None)	Electricity from/to grid	0.00369263
('ILCD 2.0 2018 midpoint', 'climate change', 'climate change total')	'ATR BM, HT+LT, + CCS (MDEA), 98 (average), maximum C uptake' (megajoule, CH, None)	Emissions from fuel burning in furnace	0
('ILCD 2.0 2018 midpoint', 'climate change', 'climate change total')	'ATR BM, HT+LT, + CCS (MDEA), 98 (average), maximum C uptake' (megajoule, CH, None)	Fuel supply chain	-0.145828
('ILCD 2.0 2018 midpoint', 'climate change', 'climate change total')	'ATR BM, HT+LT, + CCS (MDEA), 98 (average), maximum C uptake' (megajoule, CH, None)	Plant infrastructure	0.000631279
('ILCD 2.0 2018 midpoint', 'climate change', 'climate change total')	'ATR BM, HT+LT, + CCS (MDEA), 98 (average), maximum C uptake' (megajoule, CH, None)	Water supply	2.27993e-05
('ILCD 2.0 2018 midpoint', 'ecosystem quality', 'freshwater and terrestrial acidification')	'ATR BM, HT+LT, + CCS (MDEA), 98 (average), maximum C uptake' (megajoule, CH, None)	Catalysts&adsorbents	7.85337e-06
('ILCD 2.0 2018 midpoint', 'ecosystem quality', 'freshwater and terrestrial acidification')	'ATR BM, HT+LT, + CCS (MDEA), 98 (average), maximum C uptake' (megajoule, CH, None)	CO2 transport and storage	1.60359e-06
('ILCD 2.0 2018 midpoint', 'ecosystem quality', 'freshwater and terrestrial acidification')	'ATR BM, HT+LT, + CCS (MDEA), 98 (average), maximum C uptake' (megajoule, CH, None)	Direct CO2 emissions	0
('ILCD 2.0 2018 midpoint', 'ecosystem quality', 'freshwater and terrestrial acidification')	'ATR BM, HT+LT, + CCS (MDEA), 98 (average), maximum C uptake' (megajoule, CH, None)	Electricity from/to grid	1.91036e-05
('ILCD 2.0 2018 midpoint', 'ecosystem quality', 'freshwater and terrestrial acidification')	'ATR BM, HT+LT, + CCS (MDEA), 98 (average), maximum C uptake' (megajoule, CH, None)	Emissions from fuel burning in furnace	1.8498e-05
('ILCD 2.0 2018 midpoint', 'ecosystem quality', 'freshwater and terrestrial acidification')	'ATR BM, HT+LT, + CCS (MDEA), 98 (average), maximum C uptake' (megajoule, CH, None)	Fuel supply chain	0.000125075
('ILCD 2.0 2018 midpoint', 'ecosystem quality', 'freshwater and terrestrial acidification')	'ATR BM, HT+LT, + CCS (MDEA), 98 (average), maximum C uptake' (megajoule, CH, None)	Plant infrastructure	7.89891e-06
('ILCD 2.0 2018 midpoint', 'ecosystem quality', 'freshwater and terrestrial acidification')	'ATR BM, HT+LT, + CCS (MDEA), 98 (average), maximum C uptake' (megajoule, CH, None)	Water supply	2.47425e-07
('ILCD 2.0 2018 midpoint', 'ecosystem quality', 'freshwater ecotoxicity')	'ATR BM, HT+LT, + CCS (MDEA), 98 (average), maximum C uptake' (megajoule, CH, None)	Catalysts&adsorbents	0.000628182
('ILCD 2.0 2018 midpoint', 'ecosystem quality', 'freshwater ecotoxicity')	'ATR BM, HT+LT, + CCS (MDEA), 98 (average), maximum C uptake' (megajoule, CH, None)	CO2 transport and storage	9.69729e-05
('ILCD 2.0 2018 midpoint', 'ecosystem quality', 'freshwater ecotoxicity')	'ATR BM, HT+LT, + CCS (MDEA), 98 (average), maximum C uptake' (megajoule, CH, None)	Direct CO2 emissions	0
('ILCD 2.0 2018 midpoint', 'ecosystem quality', 'freshwater ecotoxicity')	'ATR BM, HT+LT, + CCS (MDEA), 98 (average), maximum C uptake' (megajoule, CH, None)	Electricity from/to grid	0.000929946
('ILCD 2.0 2018 midpoint', 'ecosystem quality', 'freshwater ecotoxicity')	'ATR BM, HT+LT, + CCS (MDEA), 98 (average), maximum C uptake' (megajoule, CH, None)	Emissions from fuel burning in furnace	0
('ILCD 2.0 2018 midpoint', 'ecosystem quality', 'freshwater ecotoxicity')	'ATR BM, HT+LT, + CCS (MDEA), 98 (average), maximum C uptake' (megajoule, CH, None)	Fuel supply chain	0.0123108
('ILCD 2.0 2018 midpoint', 'ecosystem quality', 'freshwater ecotoxicity')	'ATR BM, HT+LT, + CCS (MDEA), 98 (average), maximum C uptake' (megajoule, CH, None)	Plant infrastructure	0.00217871
('ILCD 2.0 2018 midpoint', 'ecosystem quality', 'freshwater ecotoxicity')	'ATR BM, HT+LT, + CCS (MDEA), 98 (average), maximum C uptake' (megajoule, CH, None)	Water supply	3.76329e-05
('ILCD 2.0 2018 midpoint', 'ecosystem quality', 'marine eutrophication')	'ATR BM, HT+LT, + CCS (MDEA), 98 (average), maximum C uptake' (megajoule, CH, None)	Catalysts&adsorbents	2.43506e-07
('ILCD 2.0 2018 midpoint', 'ecosystem quality', 'marine eutrophication')	'ATR BM, HT+LT, + CCS (MDEA), 98 (average), maximum C uptake' (megajoule, CH, None)	CO2 transport and storage	2.91682e-07
('ILCD 2.0 2018 midpoint', 'ecosystem quality', 'marine eutrophication')	'ATR BM, HT+LT, + CCS (MDEA), 98 (average), maximum C uptake' (megajoule, CH, None)	Direct CO2 emissions	0
('ILCD 2.0 2018 midpoint', 'ecosystem quality', 'marine eutrophication')	'ATR BM, HT+LT, + CCS (MDEA), 98 (average), maximum C uptake' (megajoule, CH, None)	Electricity from/to grid	3.30132e-06
('ILCD 2.0 2018 midpoint', 'ecosystem quality', 'marine eutrophication')	'ATR BM, HT+LT, + CCS (MDEA), 98 (average), maximum C uptake' (megajoule, CH, None)	Emissions from fuel burning in furnace	9.72394e-06
('ILCD 2.0 2018 midpoint', 'ecosystem quality', 'marine eutrophication')	'ATR BM, HT+LT, + CCS (MDEA), 98 (average), maximum C uptake' (megajoule, CH, None)	Fuel supply chain	1.03927e-05
('ILCD 2.0 2018 midpoint', 'ecosystem quality', 'marine eutrophication')	'ATR BM, HT+LT, + CCS (MDEA), 98 (average), maximum C uptake' (megajoule, CH, None)	Plant infrastructure	8.8364e-07
('ILCD 2.0 2018 midpoint', 'ecosystem quality', 'marine eutrophication')	'ATR BM, HT+LT, + CCS (MDEA), 98 (average), maximum C uptake' (megajoule, CH, None)	Water supply	2.40939e-08
('ILCD 2.0 2018 midpoint', 'ecosystem quality', 'terrestrial eutrophication')	'ATR BM, HT+LT, + CCS (MDEA), 98 (average), maximum C uptake' (megajoule, CH, None)	Catalysts&adsorbents	3.26269e-06
('ILCD 2.0 2018 midpoint', 'ecosystem quality', 'terrestrial eutrophication')	'ATR BM, HT+LT, + CCS (MDEA), 98 (average), maximum C uptake' (megajoule, CH, None)	CO2 transport and storage	2.79166e-06
('ILCD 2.0 2018 midpoint', 'ecosystem quality', 'terrestrial eutrophication')	'ATR BM, HT+LT, + CCS (MDEA), 98 (average), maximum C uptake' (megajoule, CH, None)	Direct CO2 emissions	0
('ILCD 2.0 2018 midpoint', 'ecosystem quality', 'terrestrial eutrophication')	'ATR BM, HT+LT, + CCS (MDEA), 98 (average), maximum C uptake' (megajoule, CH, None)	Electricity from/to grid	3.06515e-05
('ILCD 2.0 2018 midpoint', 'ecosystem quality', 'terrestrial eutrophication')	'ATR BM, HT+LT, + CCS (MDEA), 98 (average), maximum C uptake' (megajoule, CH, None)	Emissions from fuel burning in furnace	0.000106488
('ILCD 2.0 2018 midpoint', 'ecosystem quality', 'terrestrial eutrophication')	'ATR BM, HT+LT, + CCS (MDEA), 98 (average), maximum C uptake' (megajoule, CH, None)	Fuel supply chain	0.000183954
('ILCD 2.0 2018 midpoint', 'ecosystem quality', 'terrestrial eutrophication')	'ATR BM, HT+LT, + CCS (MDEA), 98 (average), maximum C uptake' (megajoule, CH, None)	Plant infrastructure	1.03808e-05
('ILCD 2.0 2018 midpoint', 'ecosystem quality', 'terrestrial eutrophication')	'ATR BM, HT+LT, + CCS (MDEA), 98 (average), maximum C uptake' (megajoule, CH, None)	Water supply	2.44598e-07
('ILCD 2.0 2018 midpoint', 'human health', 'carcinogenic effects')	'ATR BM, HT+LT, + CCS (MDEA), 98 (average), maximum C uptake' (megajoule, CH, None)	Catalysts&adsorbents	2.32399e-11
('ILCD 2.0 2018 midpoint', 'human health', 'carcinogenic effects')	'ATR BM, HT+LT, + CCS (MDEA), 98 (average), maximum C uptake' (megajoule, CH, None)	CO2 transport and storage	3.69164e-12
('ILCD 2.0 2018 midpoint', 'human health', 'carcinogenic effects')	'ATR BM, HT+LT, + CCS (MDEA), 98 (average), maximum C uptake' (megajoule, CH, None)	Direct CO2 emissions	0
('ILCD 2.0 2018 midpoint', 'human health', 'carcinogenic effects')	'ATR BM, HT+LT, + CCS (MDEA), 98 (average), maximum C uptake' (megajoule, CH, None)	Electricity from/to grid	2.53154e-11
('ILCD 2.0 2018 midpoint', 'human health', 'carcinogenic effects')	'ATR BM, HT+LT, + CCS (MDEA), 98 (average), maximum C uptake' (megajoule, CH, None)	Emissions from fuel burning in furnace	0
('ILCD 2.0 2018 midpoint', 'human health', 'carcinogenic effects')	'ATR BM, HT+LT, + CCS (MDEA), 98 (average), maximum C uptake' (megajoule, CH, None)	Fuel supply chain	3.46697e-10
('ILCD 2.0 2018 midpoint', 'human health', 'carcinogenic effects')	'ATR BM, HT+LT, + CCS (MDEA), 98 (average), maximum C uptake' (megajoule, CH, None)	Plant infrastructure	7.30488e-11
('ILCD 2.0 2018 midpoint', 'human health', 'carcinogenic effects')	'ATR BM, HT+LT, + CCS (MDEA), 98 (average), maximum C uptake' (megajoule, CH, None)	Water supply	9.08745e-13
('ILCD 2.0 2018 midpoint', 'human health', 'ionising radiation')	'ATR BM, HT+LT, + CCS (MDEA), 98 (average), maximum C uptake' (megajoule, CH, None)	Catalysts&adsorbents	6.50284e-06
('ILCD 2.0 2018 midpoint', 'human health', 'ionising radiation')	'ATR BM, HT+LT, + CCS (MDEA), 98 (average), maximum C uptake' (megajoule, CH, None)	CO2 transport and storage	0.000152354
('ILCD 2.0 2018 midpoint', 'human health', 'ionising radiation')	'ATR BM, HT+LT, + CCS (MDEA), 98 (average), maximum C uptake' (megajoule, CH, None)	Direct CO2 emissions	0
('ILCD 2.0 2018 midpoint', 'human health', 'ionising radiation')	'ATR BM, HT+LT, + CCS (MDEA), 98 (average), maximum C uptake' (megajoule, CH, None)	Electricity from/to grid	0.00204104
('ILCD 2.0 2018 midpoint', 'human health', 'ionising radiation')	'ATR BM, HT+LT, + CCS (MDEA), 98 (average), maximum C uptake' (megajoule, CH, None)	Emissions from fuel burning in furnace	0
('ILCD 2.0 2018 midpoint', 'human health', 'ionising radiation')	'ATR BM, HT+LT, + CCS (MDEA), 98 (average), maximum C uptake' (megajoule, CH, None)	Fuel supply chain	0.00206
('ILCD 2.0 2018 midpoint', 'human health', 'ionising radiation')	'ATR BM, HT+LT, + CCS (MDEA), 98 (average), maximum C uptake' (megajoule, CH, None)	Plant infrastructure	0.000106411
('ILCD 2.0 2018 midpoint', 'human health', 'ionising radiation')	'ATR BM, HT+LT, + CCS (MDEA), 98 (average), maximum C uptake' (megajoule, CH, None)	Water supply	3.82124e-06
('ILCD 2.0 2018 midpoint', 'human health', 'non-carcinogenic effects')	'ATR BM, HT+LT, + CCS (MDEA), 98 (average), maximum C uptake' (megajoule, CH, None)	Catalysts&adsorbents	1.68319e-10
('ILCD 2.0 2018 midpoint', 'human health', 'non-carcinogenic effects')	'ATR BM, HT+LT, + CCS (MDEA), 98 (average), maximum C uptake' (megajoule, CH, None)	CO2 transport and storage	3.21761e-11
('ILCD 2.0 2018 midpoint', 'human health', 'non-carcinogenic effects')	'ATR BM, HT+LT, + CCS (MDEA), 98 (average), maximum C uptake' (megajoule, CH, None)	Direct CO2 emissions	0
('ILCD 2.0 2018 midpoint', 'human health', 'non-carcinogenic effects')	'ATR BM, HT+LT, + CCS (MDEA), 98 (average), maximum C uptake' (megajoule, CH, None)	Electricity from/to grid	3.66868e-10
('ILCD 2.0 2018 midpoint', 'human health', 'non-carcinogenic effects')	'ATR BM, HT+LT, + CCS (MDEA), 98 (average), maximum C uptake' (megajoule, CH, None)	Emissions from fuel burning in furnace	0
('ILCD 2.0 2018 midpoint', 'human health', 'non-carcinogenic effects')	'ATR BM, HT+LT, + CCS (MDEA), 98 (average), maximum C uptake' (megajoule, CH, None)	Fuel supply chain	3.21407e-09
('ILCD 2.0 2018 midpoint', 'human health', 'non-carcinogenic effects')	'ATR BM, HT+LT, + CCS (MDEA), 98 (average), maximum C uptake' (megajoule, CH, None)	Plant infrastructure	5.72601e-10
('ILCD 2.0 2018 midpoint', 'human health', 'non-carcinogenic effects')	'ATR BM, HT+LT, + CCS (MDEA), 98 (average), maximum C uptake' (megajoule, CH, None)	Water supply	6.85547e-12
('ILCD 2.0 2018 midpoint', 'human health', 'ozone layer depletion')	'ATR BM, HT+LT, + CCS (MDEA), 98 (average), maximum C uptake' (megajoule, CH, None)	Catalysts&adsorbents	1.38511e-11
('ILCD 2.0 2018 midpoint', 'human health', 'ozone layer depletion')	'ATR BM, HT+LT, + CCS (MDEA), 98 (average), maximum C uptake' (megajoule, CH, None)	CO2 transport and storage	2.47261e-11
('ILCD 2.0 2018 midpoint', 'human health', 'ozone layer depletion')	'ATR BM, HT+LT, + CCS (MDEA), 98 (average), maximum C uptake' (megajoule, CH, None)	Direct CO2 emissions	0
('ILCD 2.0 2018 midpoint', 'human health', 'ozone layer depletion')	'ATR BM, HT+LT, + CCS (MDEA), 98 (average), maximum C uptake' (megajoule, CH, None)	Electricity from/to grid	3.16155e-10
('ILCD 2.0 2018 midpoint', 'human health', 'ozone layer depletion')	'ATR BM, HT+LT, + CCS (MDEA), 98 (average), maximum C uptake' (megajoule, CH, None)	Emissions from fuel burning in furnace	0
('ILCD 2.0 2018 midpoint', 'human health', 'ozone layer depletion')	'ATR BM, HT+LT, + CCS (MDEA), 98 (average), maximum C uptake' (megajoule, CH, None)	Fuel supply chain	9.73203e-10
('ILCD 2.0 2018 midpoint', 'human health', 'ozone layer depletion')	'ATR BM, HT+LT, + CCS (MDEA), 98 (average), maximum C uptake' (megajoule, CH, None)	Plant infrastructure	4.70935e-11
('ILCD 2.0 2018 midpoint', 'human health', 'ozone layer depletion')	'ATR BM, HT+LT, + CCS (MDEA), 98 (average), maximum C uptake' (megajoule, CH, None)	Water supply	1.53782e-11
('ILCD 2.0 2018 midpoint', 'human health', 'photochemical ozone creation')	'ATR BM, HT+LT, + CCS (MDEA), 98 (average), maximum C uptake' (megajoule, CH, None)	Catalysts&adsorbents	1.11653e-06
('ILCD 2.0 2018 midpoint', 'human health', 'photochemical ozone creation')	'ATR BM, HT+LT, + CCS (MDEA), 98 (average), maximum C uptake' (megajoule, CH, None)	CO2 transport and storage	7.16988e-07
('ILCD 2.0 2018 midpoint', 'human health', 'photochemical ozone creation')	'ATR BM, HT+LT, + CCS (MDEA), 98 (average), maximum C uptake' (megajoule, CH, None)	Direct CO2 emissions	0
('ILCD 2.0 2018 midpoint', 'human health', 'photochemical ozone creation')	'ATR BM, HT+LT, + CCS (MDEA), 98 (average), maximum C uptake' (megajoule, CH, None)	Electricity from/to grid	7.60143e-06
('ILCD 2.0 2018 midpoint', 'human health', 'photochemical ozone creation')	'ATR BM, HT+LT, + CCS (MDEA), 98 (average), maximum C uptake' (megajoule, CH, None)	Emissions from fuel burning in furnace	2.49973e-05
('ILCD 2.0 2018 midpoint', 'human health', 'photochemical ozone creation')	'ATR BM, HT+LT, + CCS (MDEA), 98 (average), maximum C uptake' (megajoule, CH, None)	Fuel supply chain	3.26026e-05
('ILCD 2.0 2018 midpoint', 'human health', 'photochemical ozone creation')	'ATR BM, HT+LT, + CCS (MDEA), 98 (average), maximum C uptake' (megajoule, CH, None)	Plant infrastructure	2.97279e-06
('ILCD 2.0 2018 midpoint', 'human health', 'photochemical ozone creation')	'ATR BM, HT+LT, + CCS (MDEA), 98 (average), maximum C uptake' (megajoule, CH, None)	Water supply	7.74425e-08
('ILCD 2.0 2018 midpoint', 'human health', 'respiratory effects, inorganics')	'ATR BM, HT+LT, + CCS (MDEA), 98 (average), maximum C uptake' (megajoule, CH, None)	Catalysts&adsorbents	1.45044e-11
('ILCD 2.0 2018 midpoint', 'human health', 'respiratory effects, inorganics')	'ATR BM, HT+LT, + CCS (MDEA), 98 (average), maximum C uptake' (megajoule, CH, None)	CO2 transport and storage	5.53135e-12
('ILCD 2.0 2018 midpoint', 'human health', 'respiratory effects, inorganics')	'ATR BM, HT+LT, + CCS (MDEA), 98 (average), maximum C uptake' (megajoule, CH, None)	Direct CO2 emissions	0
('ILCD 2.0 2018 midpoint', 'human health', 'respiratory effects, inorganics')	'ATR BM, HT+LT, + CCS (MDEA), 98 (average), maximum C uptake' (megajoule, CH, None)	Electricity from/to grid	5.59012e-11
('ILCD 2.0 2018 midpoint', 'human health', 'respiratory effects, inorganics')	'ATR BM, HT+LT, + CCS (MDEA), 98 (average), maximum C uptake' (megajoule, CH, None)	Emissions from fuel burning in furnace	3.99956e-11
('ILCD 2.0 2018 midpoint', 'human health', 'respiratory effects, inorganics')	'ATR BM, HT+LT, + CCS (MDEA), 98 (average), maximum C uptake' (megajoule, CH, None)	Fuel supply chain	8.9363e-10
('ILCD 2.0 2018 midpoint', 'human health', 'respiratory effects, inorganics')	'ATR BM, HT+LT, + CCS (MDEA), 98 (average), maximum C uptake' (megajoule, CH, None)	Plant infrastructure	4.70314e-11
('ILCD 2.0 2018 midpoint', 'human health', 'respiratory effects, inorganics')	'ATR BM, HT+LT, + CCS (MDEA), 98 (average), maximum C uptake' (megajoule, CH, None)	Water supply	1.74323e-12
('ILCD 2.0 2018 midpoint', 'resources', 'fossils')	'ATR BM, HT+LT, + CCS (MDEA), 98 (average), maximum C uptake' (megajoule, CH, None)	Catalysts&adsorbents	0.00122557
('ILCD 2.0 2018 midpoint', 'resources', 'fossils')	'ATR BM, HT+LT, + CCS (MDEA), 98 (average), maximum C uptake' (megajoule, CH, None)	CO2 transport and storage	0.0065887
('ILCD 2.0 2018 midpoint', 'resources', 'fossils')	'ATR BM, HT+LT, + CCS (MDEA), 98 (average), maximum C uptake' (megajoule, CH, None)	Direct CO2 emissions	0
('ILCD 2.0 2018 midpoint', 'resources', 'fossils')	'ATR BM, HT+LT, + CCS (MDEA), 98 (average), maximum C uptake' (megajoule, CH, None)	Electricity from/to grid	0.0859705
('ILCD 2.0 2018 midpoint', 'resources', 'fossils')	'ATR BM, HT+LT, + CCS (MDEA), 98 (average), maximum C uptake' (megajoule, CH, None)	Emissions from fuel burning in furnace	0
('ILCD 2.0 2018 midpoint', 'resources', 'fossils')	'ATR BM, HT+LT, + CCS (MDEA), 98 (average), maximum C uptake' (megajoule, CH, None)	Fuel supply chain	0.158317
('ILCD 2.0 2018 midpoint', 'resources', 'fossils')	'ATR BM, HT+LT, + CCS (MDEA), 98 (average), maximum C uptake' (megajoule, CH, None)	Plant infrastructure	0.00956902
('ILCD 2.0 2018 midpoint', 'resources', 'fossils')	'ATR BM, HT+LT, + CCS (MDEA), 98 (average), maximum C uptake' (megajoule, CH, None)	Water supply	0.000352254
('ILCD 2.0 2018 midpoint', 'resources', 'land use')	'ATR BM, HT+LT, + CCS (MDEA), 98 (average), maximum C uptake' (megajoule, CH, None)	Catalysts&adsorbents	0.00112991
('ILCD 2.0 2018 midpoint', 'resources', 'land use')	'ATR BM, HT+LT, + CCS (MDEA), 98 (average), maximum C uptake' (megajoule, CH, None)	CO2 transport and storage	0.00269994
('ILCD 2.0 2018 midpoint', 'resources', 'land use')	'ATR BM, HT+LT, + CCS (MDEA), 98 (average), maximum C uptake' (megajoule, CH, None)	Direct CO2 emissions	0
('ILCD 2.0 2018 midpoint', 'resources', 'land use')	'ATR BM, HT+LT, + CCS (MDEA), 98 (average), maximum C uptake' (megajoule, CH, None)	Electricity from/to grid	0.0377822
('ILCD 2.0 2018 midpoint', 'resources', 'land use')	'ATR BM, HT+LT, + CCS (MDEA), 98 (average), maximum C uptake' (megajoule, CH, None)	Emissions from fuel burning in furnace	0
('ILCD 2.0 2018 midpoint', 'resources', 'land use')	'ATR BM, HT+LT, + CCS (MDEA), 98 (average), maximum C uptake' (megajoule, CH, None)	Fuel supply chain	0.14078
('ILCD 2.0 2018 midpoint', 'resources', 'land use')	'ATR BM, HT+LT, + CCS (MDEA), 98 (average), maximum C uptake' (megajoule, CH, None)	Plant infrastructure	0.0215588
('ILCD 2.0 2018 midpoint', 'resources', 'land use')	'ATR BM, HT+LT, + CCS (MDEA), 98 (average), maximum C uptake' (megajoule, CH, None)	Water supply	0.000178245
('ILCD 2.0 2018 midpoint', 'resources', 'minerals and metals')	'ATR BM, HT+LT, + CCS (MDEA), 98 (average), maximum C uptake' (megajoule, CH, None)	Catalysts&adsorbents	1.55187e-08
('ILCD 2.0 2018 midpoint', 'resources', 'minerals and metals')	'ATR BM, HT+LT, + CCS (MDEA), 98 (average), maximum C uptake' (megajoule, CH, None)	CO2 transport and storage	8.87035e-10
('ILCD 2.0 2018 midpoint', 'resources', 'minerals and metals')	'ATR BM, HT+LT, + CCS (MDEA), 98 (average), maximum C uptake' (megajoule, CH, None)	Direct CO2 emissions	0
('ILCD 2.0 2018 midpoint', 'resources', 'minerals and metals')	'ATR BM, HT+LT, + CCS (MDEA), 98 (average), maximum C uptake' (megajoule, CH, None)	Electricity from/to grid	8.57976e-09
('ILCD 2.0 2018 midpoint', 'resources', 'minerals and metals')	'ATR BM, HT+LT, + CCS (MDEA), 98 (average), maximum C uptake' (megajoule, CH, None)	Emissions from fuel burning in furnace	0
('ILCD 2.0 2018 midpoint', 'resources', 'minerals and metals')	'ATR BM, HT+LT, + CCS (MDEA), 98 (average), maximum C uptake' (megajoule, CH, None)	Fuel supply chain	1.24661e-06
('ILCD 2.0 2018 midpoint', 'resources', 'minerals and metals')	'ATR BM, HT+LT, + CCS (MDEA), 98 (average), maximum C uptake' (megajoule, CH, None)	Plant infrastructure	1.81183e-07
('ILCD 2.0 2018 midpoint', 'resources', 'minerals and metals')	'ATR BM, HT+LT, + CCS (MDEA), 98 (average), maximum C uptake' (megajoule, CH, None)	Water supply	6.76658e-10
('ReCiPe Midpoint (H) V1.13', 'metal depletion', 'MDP')	'ATR BM, HT+LT, + CCS (MDEA), 98 (average), maximum C uptake' (megajoule, CH, None)	Catalysts&adsorbents	0.00028327
('ReCiPe Midpoint (H) V1.13', 'metal depletion', 'MDP')	'ATR BM, HT+LT, + CCS (MDEA), 98 (average), maximum C uptake' (megajoule, CH, None)	CO2 transport and storage	3.90566e-06
('ReCiPe Midpoint (H) V1.13', 'metal depletion', 'MDP')	'ATR BM, HT+LT, + CCS (MDEA), 98 (average), maximum C uptake' (megajoule, CH, None)	Direct CO2 emissions	0
('ReCiPe Midpoint (H) V1.13', 'metal depletion', 'MDP')	'ATR BM, HT+LT, + CCS (MDEA), 98 (average), maximum C uptake' (megajoule, CH, None)	Electricity from/to grid	3.08149e-05
('ReCiPe Midpoint (H) V1.13', 'metal depletion', 'MDP')	'ATR BM, HT+LT, + CCS (MDEA), 98 (average), maximum C uptake' (megajoule, CH, None)	Emissions from fuel burning in furnace	0
('ReCiPe Midpoint (H) V1.13', 'metal depletion', 'MDP')	'ATR BM, HT+LT, + CCS (MDEA), 98 (average), maximum C uptake' (megajoule, CH, None)	Fuel supply chain	0.00318383
('ReCiPe Midpoint (H) V1.13', 'metal depletion', 'MDP')	'ATR BM, HT+LT, + CCS (MDEA), 98 (average), maximum C uptake' (megajoule, CH, None)	Plant infrastructure	0.000575174
('ReCiPe Midpoint (H) V1.13', 'metal depletion', 'MDP')	'ATR BM, HT+LT, + CCS (MDEA), 98 (average), maximum C uptake' (megajoule, CH, None)	Water supply	2.07628e-06
('cumulative energy demand', 'fossil', 'non-renewable energy resources, fossil')	'ATR BM, HT+LT, + CCS (MDEA), 98 (lower bound)' (megajoule, CH, None)	Catalysts&adsorbents	0.00120265
('cumulative energy demand', 'fossil', 'non-renewable energy resources, fossil')	'ATR BM, HT+LT, + CCS (MDEA), 98 (lower bound)' (megajoule, CH, None)	CO2 transport and storage	0.00347798
('cumulative energy demand', 'fossil', 'non-renewable energy resources, fossil')	'ATR BM, HT+LT, + CCS (MDEA), 98 (lower bound)' (megajoule, CH, None)	Direct CO2 emissions	0
('cumulative energy demand', 'fossil', 'non-renewable energy resources, fossil')	'ATR BM, HT+LT, + CCS (MDEA), 98 (lower bound)' (megajoule, CH, None)	Electricity from/to grid	0.0444368
('cumulative energy demand', 'fossil', 'non-renewable energy resources, fossil')	'ATR BM, HT+LT, + CCS (MDEA), 98 (lower bound)' (megajoule, CH, None)	Emissions from fuel burning in furnace	0
('cumulative energy demand', 'fossil', 'non-renewable energy resources, fossil')	'ATR BM, HT+LT, + CCS (MDEA), 98 (lower bound)' (megajoule, CH, None)	Fuel supply chain	0.116946
('cumulative energy demand', 'fossil', 'non-renewable energy resources, fossil')	'ATR BM, HT+LT, + CCS (MDEA), 98 (lower bound)' (megajoule, CH, None)	Plant infrastructure	0.00693806
('cumulative energy demand', 'fossil', 'non-renewable energy resources, fossil')	'ATR BM, HT+LT, + CCS (MDEA), 98 (lower bound)' (megajoule, CH, None)	Water supply	0.000277399
('cumulative energy demand', 'nuclear', 'non-renewable energy resources, nuclear')	'ATR BM, HT+LT, + CCS (MDEA), 98 (lower bound)' (megajoule, CH, None)	Catalysts&adsorbents	9.69395e-05
('cumulative energy demand', 'nuclear', 'non-renewable energy resources, nuclear')	'ATR BM, HT+LT, + CCS (MDEA), 98 (lower bound)' (megajoule, CH, None)	CO2 transport and storage	0.00263141
('cumulative energy demand', 'nuclear', 'non-renewable energy resources, nuclear')	'ATR BM, HT+LT, + CCS (MDEA), 98 (lower bound)' (megajoule, CH, None)	Direct CO2 emissions	0
('cumulative energy demand', 'nuclear', 'non-renewable energy resources, nuclear')	'ATR BM, HT+LT, + CCS (MDEA), 98 (lower bound)' (megajoule, CH, None)	Electricity from/to grid	0.0350644
('cumulative energy demand', 'nuclear', 'non-renewable energy resources, nuclear')	'ATR BM, HT+LT, + CCS (MDEA), 98 (lower bound)' (megajoule, CH, None)	Emissions from fuel burning in furnace	0
('cumulative energy demand', 'nuclear', 'non-renewable energy resources, nuclear')	'ATR BM, HT+LT, + CCS (MDEA), 98 (lower bound)' (megajoule, CH, None)	Fuel supply chain	0.0311952
('cumulative energy demand', 'nuclear', 'non-renewable energy resources, nuclear')	'ATR BM, HT+LT, + CCS (MDEA), 98 (lower bound)' (megajoule, CH, None)	Plant infrastructure	0.00171998
('cumulative energy demand', 'nuclear', 'non-renewable energy resources, nuclear')	'ATR BM, HT+LT, + CCS (MDEA), 98 (lower bound)' (megajoule, CH, None)	Water supply	5.86471e-05
('cumulative energy demand', 'primary forest', 'non-renewable energy resources, primary forest')	'ATR BM, HT+LT, + CCS (MDEA), 98 (lower bound)' (megajoule, CH, None)	Catalysts&adsorbents	2.2292e-08
('cumulative energy demand', 'primary forest', 'non-renewable energy resources, primary forest')	'ATR BM, HT+LT, + CCS (MDEA), 98 (lower bound)' (megajoule, CH, None)	CO2 transport and storage	5.12046e-08
('cumulative energy demand', 'primary forest', 'non-renewable energy resources, primary forest')	'ATR BM, HT+LT, + CCS (MDEA), 98 (lower bound)' (megajoule, CH, None)	Direct CO2 emissions	0
('cumulative energy demand', 'primary forest', 'non-renewable energy resources, primary forest')	'ATR BM, HT+LT, + CCS (MDEA), 98 (lower bound)' (megajoule, CH, None)	Electricity from/to grid	3.09255e-07
('cumulative energy demand', 'primary forest', 'non-renewable energy resources, primary forest')	'ATR BM, HT+LT, + CCS (MDEA), 98 (lower bound)' (megajoule, CH, None)	Emissions from fuel burning in furnace	0
('cumulative energy demand', 'primary forest', 'non-renewable energy resources, primary forest')	'ATR BM, HT+LT, + CCS (MDEA), 98 (lower bound)' (megajoule, CH, None)	Fuel supply chain	2.08208e-06
('cumulative energy demand', 'primary forest', 'non-renewable energy resources, primary forest')	'ATR BM, HT+LT, + CCS (MDEA), 98 (lower bound)' (megajoule, CH, None)	Plant infrastructure	3.70972e-07
('cumulative energy demand', 'primary forest', 'non-renewable energy resources, primary forest')	'ATR BM, HT+LT, + CCS (MDEA), 98 (lower bound)' (megajoule, CH, None)	Water supply	4.68063e-09
('ILCD 2.0 2018 midpoint', 'climate change', 'climate change total')	'ATR BM, HT+LT, + CCS (MDEA), 98 (lower bound)' (megajoule, CH, None)	Catalysts&adsorbents	9.81592e-05
('ILCD 2.0 2018 midpoint', 'climate change', 'climate change total')	'ATR BM, HT+LT, + CCS (MDEA), 98 (lower bound)' (megajoule, CH, None)	CO2 transport and storage	0.000286444
('ILCD 2.0 2018 midpoint', 'climate change', 'climate change total')	'ATR BM, HT+LT, + CCS (MDEA), 98 (lower bound)' (megajoule, CH, None)	Direct CO2 emissions	0.0047197
('ILCD 2.0 2018 midpoint', 'climate change', 'climate change total')	'ATR BM, HT+LT, + CCS (MDEA), 98 (lower bound)' (megajoule, CH, None)	Electricity from/to grid	0.00367908
('ILCD 2.0 2018 midpoint', 'climate change', 'climate change total')	'ATR BM, HT+LT, + CCS (MDEA), 98 (lower bound)' (megajoule, CH, None)	Emissions from fuel burning in furnace	0
('ILCD 2.0 2018 midpoint', 'climate change', 'climate change total')	'ATR BM, HT+LT, + CCS (MDEA), 98 (lower bound)' (megajoule, CH, None)	Fuel supply chain	-0.100381
('ILCD 2.0 2018 midpoint', 'climate change', 'climate change total')	'ATR BM, HT+LT, + CCS (MDEA), 98 (lower bound)' (megajoule, CH, None)	Plant infrastructure	0.000631279
('ILCD 2.0 2018 midpoint', 'climate change', 'climate change total')	'ATR BM, HT+LT, + CCS (MDEA), 98 (lower bound)' (megajoule, CH, None)	Water supply	2.27993e-05
('ILCD 2.0 2018 midpoint', 'ecosystem quality', 'freshwater and terrestrial acidification')	'ATR BM, HT+LT, + CCS (MDEA), 98 (lower bound)' (megajoule, CH, None)	Catalysts&adsorbents	7.88374e-06
('ILCD 2.0 2018 midpoint', 'ecosystem quality', 'freshwater and terrestrial acidification')	'ATR BM, HT+LT, + CCS (MDEA), 98 (lower bound)' (megajoule, CH, None)	CO2 transport and storage	1.60359e-06
('ILCD 2.0 2018 midpoint', 'ecosystem quality', 'freshwater and terrestrial acidification')	'ATR BM, HT+LT, + CCS (MDEA), 98 (lower bound)' (megajoule, CH, None)	Direct CO2 emissions	0
('ILCD 2.0 2018 midpoint', 'ecosystem quality', 'freshwater and terrestrial acidification')	'ATR BM, HT+LT, + CCS (MDEA), 98 (lower bound)' (megajoule, CH, None)	Electricity from/to grid	1.90336e-05
('ILCD 2.0 2018 midpoint', 'ecosystem quality', 'freshwater and terrestrial acidification')	'ATR BM, HT+LT, + CCS (MDEA), 98 (lower bound)' (megajoule, CH, None)	Emissions from fuel burning in furnace	1.8498e-05
('ILCD 2.0 2018 midpoint', 'ecosystem quality', 'freshwater and terrestrial acidification')	'ATR BM, HT+LT, + CCS (MDEA), 98 (lower bound)' (megajoule, CH, None)	Fuel supply chain	0.000125075
('ILCD 2.0 2018 midpoint', 'ecosystem quality', 'freshwater and terrestrial acidification')	'ATR BM, HT+LT, + CCS (MDEA), 98 (lower bound)' (megajoule, CH, None)	Plant infrastructure	7.89891e-06
('ILCD 2.0 2018 midpoint', 'ecosystem quality', 'freshwater and terrestrial acidification')	'ATR BM, HT+LT, + CCS (MDEA), 98 (lower bound)' (megajoule, CH, None)	Water supply	2.47425e-07
('ILCD 2.0 2018 midpoint', 'ecosystem quality', 'freshwater ecotoxicity')	'ATR BM, HT+LT, + CCS (MDEA), 98 (lower bound)' (megajoule, CH, None)	Catalysts&adsorbents	0.00063174
('ILCD 2.0 2018 midpoint', 'ecosystem quality', 'freshwater ecotoxicity')	'ATR BM, HT+LT, + CCS (MDEA), 98 (lower bound)' (megajoule, CH, None)	CO2 transport and storage	9.69729e-05
('ILCD 2.0 2018 midpoint', 'ecosystem quality', 'freshwater ecotoxicity')	'ATR BM, HT+LT, + CCS (MDEA), 98 (lower bound)' (megajoule, CH, None)	Direct CO2 emissions	0
('ILCD 2.0 2018 midpoint', 'ecosystem quality', 'freshwater ecotoxicity')	'ATR BM, HT+LT, + CCS (MDEA), 98 (lower bound)' (megajoule, CH, None)	Electricity from/to grid	0.000926536
('ILCD 2.0 2018 midpoint', 'ecosystem quality', 'freshwater ecotoxicity')	'ATR BM, HT+LT, + CCS (MDEA), 98 (lower bound)' (megajoule, CH, None)	Emissions from fuel burning in furnace	0
('ILCD 2.0 2018 midpoint', 'ecosystem quality', 'freshwater ecotoxicity')	'ATR BM, HT+LT, + CCS (MDEA), 98 (lower bound)' (megajoule, CH, None)	Fuel supply chain	0.0123108
('ILCD 2.0 2018 midpoint', 'ecosystem quality', 'freshwater ecotoxicity')	'ATR BM, HT+LT, + CCS (MDEA), 98 (lower bound)' (megajoule, CH, None)	Plant infrastructure	0.00217871
('ILCD 2.0 2018 midpoint', 'ecosystem quality', 'freshwater ecotoxicity')	'ATR BM, HT+LT, + CCS (MDEA), 98 (lower bound)' (megajoule, CH, None)	Water supply	3.76329e-05
('ILCD 2.0 2018 midpoint', 'ecosystem quality', 'marine eutrophication')	'ATR BM, HT+LT, + CCS (MDEA), 98 (lower bound)' (megajoule, CH, None)	Catalysts&adsorbents	2.61333e-07
('ILCD 2.0 2018 midpoint', 'ecosystem quality', 'marine eutrophication')	'ATR BM, HT+LT, + CCS (MDEA), 98 (lower bound)' (megajoule, CH, None)	CO2 transport and storage	2.91682e-07
('ILCD 2.0 2018 midpoint', 'ecosystem quality', 'marine eutrophication')	'ATR BM, HT+LT, + CCS (MDEA), 98 (lower bound)' (megajoule, CH, None)	Direct CO2 emissions	0
('ILCD 2.0 2018 midpoint', 'ecosystem quality', 'marine eutrophication')	'ATR BM, HT+LT, + CCS (MDEA), 98 (lower bound)' (megajoule, CH, None)	Electricity from/to grid	3.28921e-06
('ILCD 2.0 2018 midpoint', 'ecosystem quality', 'marine eutrophication')	'ATR BM, HT+LT, + CCS (MDEA), 98 (lower bound)' (megajoule, CH, None)	Emissions from fuel burning in furnace	9.72394e-06
('ILCD 2.0 2018 midpoint', 'ecosystem quality', 'marine eutrophication')	'ATR BM, HT+LT, + CCS (MDEA), 98 (lower bound)' (megajoule, CH, None)	Fuel supply chain	1.03927e-05
('ILCD 2.0 2018 midpoint', 'ecosystem quality', 'marine eutrophication')	'ATR BM, HT+LT, + CCS (MDEA), 98 (lower bound)' (megajoule, CH, None)	Plant infrastructure	8.8364e-07
('ILCD 2.0 2018 midpoint', 'ecosystem quality', 'marine eutrophication')	'ATR BM, HT+LT, + CCS (MDEA), 98 (lower bound)' (megajoule, CH, None)	Water supply	2.40939e-08
('ILCD 2.0 2018 midpoint', 'ecosystem quality', 'terrestrial eutrophication')	'ATR BM, HT+LT, + CCS (MDEA), 98 (lower bound)' (megajoule, CH, None)	Catalysts&adsorbents	3.32642e-06
('ILCD 2.0 2018 midpoint', 'ecosystem quality', 'terrestrial eutrophication')	'ATR BM, HT+LT, + CCS (MDEA), 98 (lower bound)' (megajoule, CH, None)	CO2 transport and storage	2.79166e-06
('ILCD 2.0 2018 midpoint', 'ecosystem quality', 'terrestrial eutrophication')	'ATR BM, HT+LT, + CCS (MDEA), 98 (lower bound)' (megajoule, CH, None)	Direct CO2 emissions	0
('ILCD 2.0 2018 midpoint', 'ecosystem quality', 'terrestrial eutrophication')	'ATR BM, HT+LT, + CCS (MDEA), 98 (lower bound)' (megajoule, CH, None)	Electricity from/to grid	3.05391e-05
('ILCD 2.0 2018 midpoint', 'ecosystem quality', 'terrestrial eutrophication')	'ATR BM, HT+LT, + CCS (MDEA), 98 (lower bound)' (megajoule, CH, None)	Emissions from fuel burning in furnace	0.000106488
('ILCD 2.0 2018 midpoint', 'ecosystem quality', 'terrestrial eutrophication')	'ATR BM, HT+LT, + CCS (MDEA), 98 (lower bound)' (megajoule, CH, None)	Fuel supply chain	0.000183954
('ILCD 2.0 2018 midpoint', 'ecosystem quality', 'terrestrial eutrophication')	'ATR BM, HT+LT, + CCS (MDEA), 98 (lower bound)' (megajoule, CH, None)	Plant infrastructure	1.03808e-05
('ILCD 2.0 2018 midpoint', 'ecosystem quality', 'terrestrial eutrophication')	'ATR BM, HT+LT, + CCS (MDEA), 98 (lower bound)' (megajoule, CH, None)	Water supply	2.44598e-07
('ILCD 2.0 2018 midpoint', 'human health', 'carcinogenic effects')	'ATR BM, HT+LT, + CCS (MDEA), 98 (lower bound)' (megajoule, CH, None)	Catalysts&adsorbents	2.33251e-11
('ILCD 2.0 2018 midpoint', 'human health', 'carcinogenic effects')	'ATR BM, HT+LT, + CCS (MDEA), 98 (lower bound)' (megajoule, CH, None)	CO2 transport and storage	3.69164e-12
('ILCD 2.0 2018 midpoint', 'human health', 'carcinogenic effects')	'ATR BM, HT+LT, + CCS (MDEA), 98 (lower bound)' (megajoule, CH, None)	Direct CO2 emissions	0
('ILCD 2.0 2018 midpoint', 'human health', 'carcinogenic effects')	'ATR BM, HT+LT, + CCS (MDEA), 98 (lower bound)' (megajoule, CH, None)	Electricity from/to grid	2.52226e-11
('ILCD 2.0 2018 midpoint', 'human health', 'carcinogenic effects')	'ATR BM, HT+LT, + CCS (MDEA), 98 (lower bound)' (megajoule, CH, None)	Emissions from fuel burning in furnace	0
('ILCD 2.0 2018 midpoint', 'human health', 'carcinogenic effects')	'ATR BM, HT+LT, + CCS (MDEA), 98 (lower bound)' (megajoule, CH, None)	Fuel supply chain	3.46697e-10
('ILCD 2.0 2018 midpoint', 'human health', 'carcinogenic effects')	'ATR BM, HT+LT, + CCS (MDEA), 98 (lower bound)' (megajoule, CH, None)	Plant infrastructure	7.30488e-11
('ILCD 2.0 2018 midpoint', 'human health', 'carcinogenic effects')	'ATR BM, HT+LT, + CCS (MDEA), 98 (lower bound)' (megajoule, CH, None)	Water supply	9.08745e-13
('ILCD 2.0 2018 midpoint', 'human health', 'ionising radiation')	'ATR BM, HT+LT, + CCS (MDEA), 98 (lower bound)' (megajoule, CH, None)	Catalysts&adsorbents	6.98975e-06
('ILCD 2.0 2018 midpoint', 'human health', 'ionising radiation')	'ATR BM, HT+LT, + CCS (MDEA), 98 (lower bound)' (megajoule, CH, None)	CO2 transport and storage	0.000152354
('ILCD 2.0 2018 midpoint', 'human health', 'ionising radiation')	'ATR BM, HT+LT, + CCS (MDEA), 98 (lower bound)' (megajoule, CH, None)	Direct CO2 emissions	0
('ILCD 2.0 2018 midpoint', 'human health', 'ionising radiation')	'ATR BM, HT+LT, + CCS (MDEA), 98 (lower bound)' (megajoule, CH, None)	Electricity from/to grid	0.00203355
('ILCD 2.0 2018 midpoint', 'human health', 'ionising radiation')	'ATR BM, HT+LT, + CCS (MDEA), 98 (lower bound)' (megajoule, CH, None)	Emissions from fuel burning in furnace	0
('ILCD 2.0 2018 midpoint', 'human health', 'ionising radiation')	'ATR BM, HT+LT, + CCS (MDEA), 98 (lower bound)' (megajoule, CH, None)	Fuel supply chain	0.00206
('ILCD 2.0 2018 midpoint', 'human health', 'ionising radiation')	'ATR BM, HT+LT, + CCS (MDEA), 98 (lower bound)' (megajoule, CH, None)	Plant infrastructure	0.000106411
('ILCD 2.0 2018 midpoint', 'human health', 'ionising radiation')	'ATR BM, HT+LT, + CCS (MDEA), 98 (lower bound)' (megajoule, CH, None)	Water supply	3.82124e-06
('ILCD 2.0 2018 midpoint', 'human health', 'non-carcinogenic effects')	'ATR BM, HT+LT, + CCS (MDEA), 98 (lower bound)' (megajoule, CH, None)	Catalysts&adsorbents	1.68829e-10
('ILCD 2.0 2018 midpoint', 'human health', 'non-carcinogenic effects')	'ATR BM, HT+LT, + CCS (MDEA), 98 (lower bound)' (megajoule, CH, None)	CO2 transport and storage	3.21761e-11
('ILCD 2.0 2018 midpoint', 'human health', 'non-carcinogenic effects')	'ATR BM, HT+LT, + CCS (MDEA), 98 (lower bound)' (megajoule, CH, None)	Direct CO2 emissions	0
('ILCD 2.0 2018 midpoint', 'human health', 'non-carcinogenic effects')	'ATR BM, HT+LT, + CCS (MDEA), 98 (lower bound)' (megajoule, CH, None)	Electricity from/to grid	3.65523e-10
('ILCD 2.0 2018 midpoint', 'human health', 'non-carcinogenic effects')	'ATR BM, HT+LT, + CCS (MDEA), 98 (lower bound)' (megajoule, CH, None)	Emissions from fuel burning in furnace	0
('ILCD 2.0 2018 midpoint', 'human health', 'non-carcinogenic effects')	'ATR BM, HT+LT, + CCS (MDEA), 98 (lower bound)' (megajoule, CH, None)	Fuel supply chain	3.21407e-09
('ILCD 2.0 2018 midpoint', 'human health', 'non-carcinogenic effects')	'ATR BM, HT+LT, + CCS (MDEA), 98 (lower bound)' (megajoule, CH, None)	Plant infrastructure	5.72601e-10
('ILCD 2.0 2018 midpoint', 'human health', 'non-carcinogenic effects')	'ATR BM, HT+LT, + CCS (MDEA), 98 (lower bound)' (megajoule, CH, None)	Water supply	6.85547e-12
('ILCD 2.0 2018 midpoint', 'human health', 'ozone layer depletion')	'ATR BM, HT+LT, + CCS (MDEA), 98 (lower bound)' (megajoule, CH, None)	Catalysts&adsorbents	1.41745e-11
('ILCD 2.0 2018 midpoint', 'human health', 'ozone layer depletion')	'ATR BM, HT+LT, + CCS (MDEA), 98 (lower bound)' (megajoule, CH, None)	CO2 transport and storage	2.47261e-11
('ILCD 2.0 2018 midpoint', 'human health', 'ozone layer depletion')	'ATR BM, HT+LT, + CCS (MDEA), 98 (lower bound)' (megajoule, CH, None)	Direct CO2 emissions	0
('ILCD 2.0 2018 midpoint', 'human health', 'ozone layer depletion')	'ATR BM, HT+LT, + CCS (MDEA), 98 (lower bound)' (megajoule, CH, None)	Electricity from/to grid	3.14996e-10
('ILCD 2.0 2018 midpoint', 'human health', 'ozone layer depletion')	'ATR BM, HT+LT, + CCS (MDEA), 98 (lower bound)' (megajoule, CH, None)	Emissions from fuel burning in furnace	0
('ILCD 2.0 2018 midpoint', 'human health', 'ozone layer depletion')	'ATR BM, HT+LT, + CCS (MDEA), 98 (lower bound)' (megajoule, CH, None)	Fuel supply chain	9.73203e-10
('ILCD 2.0 2018 midpoint', 'human health', 'ozone layer depletion')	'ATR BM, HT+LT, + CCS (MDEA), 98 (lower bound)' (megajoule, CH, None)	Plant infrastructure	4.70935e-11
('ILCD 2.0 2018 midpoint', 'human health', 'ozone layer depletion')	'ATR BM, HT+LT, + CCS (MDEA), 98 (lower bound)' (megajoule, CH, None)	Water supply	1.53782e-11
('ILCD 2.0 2018 midpoint', 'human health', 'photochemical ozone creation')	'ATR BM, HT+LT, + CCS (MDEA), 98 (lower bound)' (megajoule, CH, None)	Catalysts&adsorbents	1.13609e-06
('ILCD 2.0 2018 midpoint', 'human health', 'photochemical ozone creation')	'ATR BM, HT+LT, + CCS (MDEA), 98 (lower bound)' (megajoule, CH, None)	CO2 transport and storage	7.16988e-07
('ILCD 2.0 2018 midpoint', 'human health', 'photochemical ozone creation')	'ATR BM, HT+LT, + CCS (MDEA), 98 (lower bound)' (megajoule, CH, None)	Direct CO2 emissions	0
('ILCD 2.0 2018 midpoint', 'human health', 'photochemical ozone creation')	'ATR BM, HT+LT, + CCS (MDEA), 98 (lower bound)' (megajoule, CH, None)	Electricity from/to grid	7.57355e-06
('ILCD 2.0 2018 midpoint', 'human health', 'photochemical ozone creation')	'ATR BM, HT+LT, + CCS (MDEA), 98 (lower bound)' (megajoule, CH, None)	Emissions from fuel burning in furnace	2.49973e-05
('ILCD 2.0 2018 midpoint', 'human health', 'photochemical ozone creation')	'ATR BM, HT+LT, + CCS (MDEA), 98 (lower bound)' (megajoule, CH, None)	Fuel supply chain	3.26026e-05
('ILCD 2.0 2018 midpoint', 'human health', 'photochemical ozone creation')	'ATR BM, HT+LT, + CCS (MDEA), 98 (lower bound)' (megajoule, CH, None)	Plant infrastructure	2.97279e-06
('ILCD 2.0 2018 midpoint', 'human health', 'photochemical ozone creation')	'ATR BM, HT+LT, + CCS (MDEA), 98 (lower bound)' (megajoule, CH, None)	Water supply	7.74425e-08
('ILCD 2.0 2018 midpoint', 'human health', 'respiratory effects, inorganics')	'ATR BM, HT+LT, + CCS (MDEA), 98 (lower bound)' (megajoule, CH, None)	Catalysts&adsorbents	1.47568e-11
('ILCD 2.0 2018 midpoint', 'human health', 'respiratory effects, inorganics')	'ATR BM, HT+LT, + CCS (MDEA), 98 (lower bound)' (megajoule, CH, None)	CO2 transport and storage	5.53135e-12
('ILCD 2.0 2018 midpoint', 'human health', 'respiratory effects, inorganics')	'ATR BM, HT+LT, + CCS (MDEA), 98 (lower bound)' (megajoule, CH, None)	Direct CO2 emissions	0
('ILCD 2.0 2018 midpoint', 'human health', 'respiratory effects, inorganics')	'ATR BM, HT+LT, + CCS (MDEA), 98 (lower bound)' (megajoule, CH, None)	Electricity from/to grid	5.56962e-11
('ILCD 2.0 2018 midpoint', 'human health', 'respiratory effects, inorganics')	'ATR BM, HT+LT, + CCS (MDEA), 98 (lower bound)' (megajoule, CH, None)	Emissions from fuel burning in furnace	3.99956e-11
('ILCD 2.0 2018 midpoint', 'human health', 'respiratory effects, inorganics')	'ATR BM, HT+LT, + CCS (MDEA), 98 (lower bound)' (megajoule, CH, None)	Fuel supply chain	8.9363e-10
('ILCD 2.0 2018 midpoint', 'human health', 'respiratory effects, inorganics')	'ATR BM, HT+LT, + CCS (MDEA), 98 (lower bound)' (megajoule, CH, None)	Plant infrastructure	4.70314e-11
('ILCD 2.0 2018 midpoint', 'human health', 'respiratory effects, inorganics')	'ATR BM, HT+LT, + CCS (MDEA), 98 (lower bound)' (megajoule, CH, None)	Water supply	1.74323e-12
('ILCD 2.0 2018 midpoint', 'resources', 'fossils')	'ATR BM, HT+LT, + CCS (MDEA), 98 (lower bound)' (megajoule, CH, None)	Catalysts&adsorbents	0.00139382
('ILCD 2.0 2018 midpoint', 'resources', 'fossils')	'ATR BM, HT+LT, + CCS (MDEA), 98 (lower bound)' (megajoule, CH, None)	CO2 transport and storage	0.0065887
('ILCD 2.0 2018 midpoint', 'resources', 'fossils')	'ATR BM, HT+LT, + CCS (MDEA), 98 (lower bound)' (megajoule, CH, None)	Direct CO2 emissions	0
('ILCD 2.0 2018 midpoint', 'resources', 'fossils')	'ATR BM, HT+LT, + CCS (MDEA), 98 (lower bound)' (megajoule, CH, None)	Electricity from/to grid	0.0856552
('ILCD 2.0 2018 midpoint', 'resources', 'fossils')	'ATR BM, HT+LT, + CCS (MDEA), 98 (lower bound)' (megajoule, CH, None)	Emissions from fuel burning in furnace	0
('ILCD 2.0 2018 midpoint', 'resources', 'fossils')	'ATR BM, HT+LT, + CCS (MDEA), 98 (lower bound)' (megajoule, CH, None)	Fuel supply chain	0.158317
('ILCD 2.0 2018 midpoint', 'resources', 'fossils')	'ATR BM, HT+LT, + CCS (MDEA), 98 (lower bound)' (megajoule, CH, None)	Plant infrastructure	0.00956902
('ILCD 2.0 2018 midpoint', 'resources', 'fossils')	'ATR BM, HT+LT, + CCS (MDEA), 98 (lower bound)' (megajoule, CH, None)	Water supply	0.000352254
('ILCD 2.0 2018 midpoint', 'resources', 'land use')	'ATR BM, HT+LT, + CCS (MDEA), 98 (lower bound)' (megajoule, CH, None)	Catalysts&adsorbents	0.00115171
('ILCD 2.0 2018 midpoint', 'resources', 'land use')	'ATR BM, HT+LT, + CCS (MDEA), 98 (lower bound)' (megajoule, CH, None)	CO2 transport and storage	0.00269994
('ILCD 2.0 2018 midpoint', 'resources', 'land use')	'ATR BM, HT+LT, + CCS (MDEA), 98 (lower bound)' (megajoule, CH, None)	Direct CO2 emissions	0
('ILCD 2.0 2018 midpoint', 'resources', 'land use')	'ATR BM, HT+LT, + CCS (MDEA), 98 (lower bound)' (megajoule, CH, None)	Electricity from/to grid	0.0376436
('ILCD 2.0 2018 midpoint', 'resources', 'land use')	'ATR BM, HT+LT, + CCS (MDEA), 98 (lower bound)' (megajoule, CH, None)	Emissions from fuel burning in furnace	0
('ILCD 2.0 2018 midpoint', 'resources', 'land use')	'ATR BM, HT+LT, + CCS (MDEA), 98 (lower bound)' (megajoule, CH, None)	Fuel supply chain	0.14078
('ILCD 2.0 2018 midpoint', 'resources', 'land use')	'ATR BM, HT+LT, + CCS (MDEA), 98 (lower bound)' (megajoule, CH, None)	Plant infrastructure	0.0215588
('ILCD 2.0 2018 midpoint', 'resources', 'land use')	'ATR BM, HT+LT, + CCS (MDEA), 98 (lower bound)' (megajoule, CH, None)	Water supply	0.000178245
('ILCD 2.0 2018 midpoint', 'resources', 'minerals and metals')	'ATR BM, HT+LT, + CCS (MDEA), 98 (lower bound)' (megajoule, CH, None)	Catalysts&adsorbents	1.56083e-08
('ILCD 2.0 2018 midpoint', 'resources', 'minerals and metals')	'ATR BM, HT+LT, + CCS (MDEA), 98 (lower bound)' (megajoule, CH, None)	CO2 transport and storage	8.87035e-10
('ILCD 2.0 2018 midpoint', 'resources', 'minerals and metals')	'ATR BM, HT+LT, + CCS (MDEA), 98 (lower bound)' (megajoule, CH, None)	Direct CO2 emissions	0
('ILCD 2.0 2018 midpoint', 'resources', 'minerals and metals')	'ATR BM, HT+LT, + CCS (MDEA), 98 (lower bound)' (megajoule, CH, None)	Electricity from/to grid	8.54829e-09
('ILCD 2.0 2018 midpoint', 'resources', 'minerals and metals')	'ATR BM, HT+LT, + CCS (MDEA), 98 (lower bound)' (megajoule, CH, None)	Emissions from fuel burning in furnace	0
('ILCD 2.0 2018 midpoint', 'resources', 'minerals and metals')	'ATR BM, HT+LT, + CCS (MDEA), 98 (lower bound)' (megajoule, CH, None)	Fuel supply chain	1.24661e-06
('ILCD 2.0 2018 midpoint', 'resources', 'minerals and metals')	'ATR BM, HT+LT, + CCS (MDEA), 98 (lower bound)' (megajoule, CH, None)	Plant infrastructure	1.81183e-07
('ILCD 2.0 2018 midpoint', 'resources', 'minerals and metals')	'ATR BM, HT+LT, + CCS (MDEA), 98 (lower bound)' (megajoule, CH, None)	Water supply	6.76658e-10
('ReCiPe Midpoint (H) V1.13', 'metal depletion', 'MDP')	'ATR BM, HT+LT, + CCS (MDEA), 98 (lower bound)' (megajoule, CH, None)	Catalysts&adsorbents	0.000283553
('ReCiPe Midpoint (H) V1.13', 'metal depletion', 'MDP')	'ATR BM, HT+LT, + CCS (MDEA), 98 (lower bound)' (megajoule, CH, None)	CO2 transport and storage	3.90566e-06
('ReCiPe Midpoint (H) V1.13', 'metal depletion', 'MDP')	'ATR BM, HT+LT, + CCS (MDEA), 98 (lower bound)' (megajoule, CH, None)	Direct CO2 emissions	0
('ReCiPe Midpoint (H) V1.13', 'metal depletion', 'MDP')	'ATR BM, HT+LT, + CCS (MDEA), 98 (lower bound)' (megajoule, CH, None)	Electricity from/to grid	3.07018e-05
('ReCiPe Midpoint (H) V1.13', 'metal depletion', 'MDP')	'ATR BM, HT+LT, + CCS (MDEA), 98 (lower bound)' (megajoule, CH, None)	Emissions from fuel burning in furnace	0
('ReCiPe Midpoint (H) V1.13', 'metal depletion', 'MDP')	'ATR BM, HT+LT, + CCS (MDEA), 98 (lower bound)' (megajoule, CH, None)	Fuel supply chain	0.00318383
('ReCiPe Midpoint (H) V1.13', 'metal depletion', 'MDP')	'ATR BM, HT+LT, + CCS (MDEA), 98 (lower bound)' (megajoule, CH, None)	Plant infrastructure	0.000575174
('ReCiPe Midpoint (H) V1.13', 'metal depletion', 'MDP')	'ATR BM, HT+LT, + CCS (MDEA), 98 (lower bound)' (megajoule, CH, None)	Water supply	2.07628e-06
('cumulative energy demand', 'fossil', 'non-renewable energy resources, fossil')	'ATR BM, HT+LT, + CCS (MDEA), 98 (upper bound)' (megajoule, CH, None)	Catalysts&adsorbents	0.00120265
('cumulative energy demand', 'fossil', 'non-renewable energy resources, fossil')	'ATR BM, HT+LT, + CCS (MDEA), 98 (upper bound)' (megajoule, CH, None)	CO2 transport and storage	0.00347798
('cumulative energy demand', 'fossil', 'non-renewable energy resources, fossil')	'ATR BM, HT+LT, + CCS (MDEA), 98 (upper bound)' (megajoule, CH, None)	Direct CO2 emissions	0
('cumulative energy demand', 'fossil', 'non-renewable energy resources, fossil')	'ATR BM, HT+LT, + CCS (MDEA), 98 (upper bound)' (megajoule, CH, None)	Electricity from/to grid	0.0447639
('cumulative energy demand', 'fossil', 'non-renewable energy resources, fossil')	'ATR BM, HT+LT, + CCS (MDEA), 98 (upper bound)' (megajoule, CH, None)	Emissions from fuel burning in furnace	0
('cumulative energy demand', 'fossil', 'non-renewable energy resources, fossil')	'ATR BM, HT+LT, + CCS (MDEA), 98 (upper bound)' (megajoule, CH, None)	Fuel supply chain	0.116946
('cumulative energy demand', 'fossil', 'non-renewable energy resources, fossil')	'ATR BM, HT+LT, + CCS (MDEA), 98 (upper bound)' (megajoule, CH, None)	Plant infrastructure	0.00693806
('cumulative energy demand', 'fossil', 'non-renewable energy resources, fossil')	'ATR BM, HT+LT, + CCS (MDEA), 98 (upper bound)' (megajoule, CH, None)	Water supply	0.000277399
('cumulative energy demand', 'nuclear', 'non-renewable energy resources, nuclear')	'ATR BM, HT+LT, + CCS (MDEA), 98 (upper bound)' (megajoule, CH, None)	Catalysts&adsorbents	9.69395e-05
('cumulative energy demand', 'nuclear', 'non-renewable energy resources, nuclear')	'ATR BM, HT+LT, + CCS (MDEA), 98 (upper bound)' (megajoule, CH, None)	CO2 transport and storage	0.00263141
('cumulative energy demand', 'nuclear', 'non-renewable energy resources, nuclear')	'ATR BM, HT+LT, + CCS (MDEA), 98 (upper bound)' (megajoule, CH, None)	Direct CO2 emissions	0
('cumulative energy demand', 'nuclear', 'non-renewable energy resources, nuclear')	'ATR BM, HT+LT, + CCS (MDEA), 98 (upper bound)' (megajoule, CH, None)	Electricity from/to grid	0.0353226
('cumulative energy demand', 'nuclear', 'non-renewable energy resources, nuclear')	'ATR BM, HT+LT, + CCS (MDEA), 98 (upper bound)' (megajoule, CH, None)	Emissions from fuel burning in furnace	0
('cumulative energy demand', 'nuclear', 'non-renewable energy resources, nuclear')	'ATR BM, HT+LT, + CCS (MDEA), 98 (upper bound)' (megajoule, CH, None)	Fuel supply chain	0.0311952
('cumulative energy demand', 'nuclear', 'non-renewable energy resources, nuclear')	'ATR BM, HT+LT, + CCS (MDEA), 98 (upper bound)' (megajoule, CH, None)	Plant infrastructure	0.00171998
('cumulative energy demand', 'nuclear', 'non-renewable energy resources, nuclear')	'ATR BM, HT+LT, + CCS (MDEA), 98 (upper bound)' (megajoule, CH, None)	Water supply	5.86471e-05
('cumulative energy demand', 'primary forest', 'non-renewable energy resources, primary forest')	'ATR BM, HT+LT, + CCS (MDEA), 98 (upper bound)' (megajoule, CH, None)	Catalysts&adsorbents	2.2292e-08
('cumulative energy demand', 'primary forest', 'non-renewable energy resources, primary forest')	'ATR BM, HT+LT, + CCS (MDEA), 98 (upper bound)' (megajoule, CH, None)	CO2 transport and storage	5.12046e-08
('cumulative energy demand', 'primary forest', 'non-renewable energy resources, primary forest')	'ATR BM, HT+LT, + CCS (MDEA), 98 (upper bound)' (megajoule, CH, None)	Direct CO2 emissions	0
('cumulative energy demand', 'primary forest', 'non-renewable energy resources, primary forest')	'ATR BM, HT+LT, + CCS (MDEA), 98 (upper bound)' (megajoule, CH, None)	Electricity from/to grid	3.11531e-07
('cumulative energy demand', 'primary forest', 'non-renewable energy resources, primary forest')	'ATR BM, HT+LT, + CCS (MDEA), 98 (upper bound)' (megajoule, CH, None)	Emissions from fuel burning in furnace	0
('cumulative energy demand', 'primary forest', 'non-renewable energy resources, primary forest')	'ATR BM, HT+LT, + CCS (MDEA), 98 (upper bound)' (megajoule, CH, None)	Fuel supply chain	2.08208e-06
('cumulative energy demand', 'primary forest', 'non-renewable energy resources, primary forest')	'ATR BM, HT+LT, + CCS (MDEA), 98 (upper bound)' (megajoule, CH, None)	Plant infrastructure	3.70972e-07
('cumulative energy demand', 'primary forest', 'non-renewable energy resources, primary forest')	'ATR BM, HT+LT, + CCS (MDEA), 98 (upper bound)' (megajoule, CH, None)	Water supply	4.68063e-09
('ILCD 2.0 2018 midpoint', 'climate change', 'climate change total')	'ATR BM, HT+LT, + CCS (MDEA), 98 (upper bound)' (megajoule, CH, None)	Catalysts&adsorbents	9.81592e-05
('ILCD 2.0 2018 midpoint', 'climate change', 'climate change total')	'ATR BM, HT+LT, + CCS (MDEA), 98 (upper bound)' (megajoule, CH, None)	CO2 transport and storage	0.000286444
('ILCD 2.0 2018 midpoint', 'climate change', 'climate change total')	'ATR BM, HT+LT, + CCS (MDEA), 98 (upper bound)' (megajoule, CH, None)	Direct CO2 emissions	0.0047197
('ILCD 2.0 2018 midpoint', 'climate change', 'climate change total')	'ATR BM, HT+LT, + CCS (MDEA), 98 (upper bound)' (megajoule, CH, None)	Electricity from/to grid	0.00370617
('ILCD 2.0 2018 midpoint', 'climate change', 'climate change total')	'ATR BM, HT+LT, + CCS (MDEA), 98 (upper bound)' (megajoule, CH, None)	Emissions from fuel burning in furnace	0
('ILCD 2.0 2018 midpoint', 'climate change', 'climate change total')	'ATR BM, HT+LT, + CCS (MDEA), 98 (upper bound)' (megajoule, CH, None)	Fuel supply chain	-0.100381
('ILCD 2.0 2018 midpoint', 'climate change', 'climate change total')	'ATR BM, HT+LT, + CCS (MDEA), 98 (upper bound)' (megajoule, CH, None)	Plant infrastructure	0.000631279
('ILCD 2.0 2018 midpoint', 'climate change', 'climate change total')	'ATR BM, HT+LT, + CCS (MDEA), 98 (upper bound)' (megajoule, CH, None)	Water supply	2.27993e-05
('ILCD 2.0 2018 midpoint', 'ecosystem quality', 'freshwater and terrestrial acidification')	'ATR BM, HT+LT, + CCS (MDEA), 98 (upper bound)' (megajoule, CH, None)	Catalysts&adsorbents	7.88374e-06
('ILCD 2.0 2018 midpoint', 'ecosystem quality', 'freshwater and terrestrial acidification')	'ATR BM, HT+LT, + CCS (MDEA), 98 (upper bound)' (megajoule, CH, None)	CO2 transport and storage	1.60359e-06
('ILCD 2.0 2018 midpoint', 'ecosystem quality', 'freshwater and terrestrial acidification')	'ATR BM, HT+LT, + CCS (MDEA), 98 (upper bound)' (megajoule, CH, None)	Direct CO2 emissions	0
('ILCD 2.0 2018 midpoint', 'ecosystem quality', 'freshwater and terrestrial acidification')	'ATR BM, HT+LT, + CCS (MDEA), 98 (upper bound)' (megajoule, CH, None)	Electricity from/to grid	1.91737e-05
('ILCD 2.0 2018 midpoint', 'ecosystem quality', 'freshwater and terrestrial acidification')	'ATR BM, HT+LT, + CCS (MDEA), 98 (upper bound)' (megajoule, CH, None)	Emissions from fuel burning in furnace	1.8498e-05
('ILCD 2.0 2018 midpoint', 'ecosystem quality', 'freshwater and terrestrial acidification')	'ATR BM, HT+LT, + CCS (MDEA), 98 (upper bound)' (megajoule, CH, None)	Fuel supply chain	0.000125075
('ILCD 2.0 2018 midpoint', 'ecosystem quality', 'freshwater and terrestrial acidification')	'ATR BM, HT+LT, + CCS (MDEA), 98 (upper bound)' (megajoule, CH, None)	Plant infrastructure	7.89891e-06
('ILCD 2.0 2018 midpoint', 'ecosystem quality', 'freshwater and terrestrial acidification')	'ATR BM, HT+LT, + CCS (MDEA), 98 (upper bound)' (megajoule, CH, None)	Water supply	2.47425e-07
('ILCD 2.0 2018 midpoint', 'ecosystem quality', 'freshwater ecotoxicity')	'ATR BM, HT+LT, + CCS (MDEA), 98 (upper bound)' (megajoule, CH, None)	Catalysts&adsorbents	0.00063174
('ILCD 2.0 2018 midpoint', 'ecosystem quality', 'freshwater ecotoxicity')	'ATR BM, HT+LT, + CCS (MDEA), 98 (upper bound)' (megajoule, CH, None)	CO2 transport and storage	9.69729e-05
('ILCD 2.0 2018 midpoint', 'ecosystem quality', 'freshwater ecotoxicity')	'ATR BM, HT+LT, + CCS (MDEA), 98 (upper bound)' (megajoule, CH, None)	Direct CO2 emissions	0
('ILCD 2.0 2018 midpoint', 'ecosystem quality', 'freshwater ecotoxicity')	'ATR BM, HT+LT, + CCS (MDEA), 98 (upper bound)' (megajoule, CH, None)	Electricity from/to grid	0.000933357
('ILCD 2.0 2018 midpoint', 'ecosystem quality', 'freshwater ecotoxicity')	'ATR BM, HT+LT, + CCS (MDEA), 98 (upper bound)' (megajoule, CH, None)	Emissions from fuel burning in furnace	0
('ILCD 2.0 2018 midpoint', 'ecosystem quality', 'freshwater ecotoxicity')	'ATR BM, HT+LT, + CCS (MDEA), 98 (upper bound)' (megajoule, CH, None)	Fuel supply chain	0.0123108
('ILCD 2.0 2018 midpoint', 'ecosystem quality', 'freshwater ecotoxicity')	'ATR BM, HT+LT, + CCS (MDEA), 98 (upper bound)' (megajoule, CH, None)	Plant infrastructure	0.00217871
('ILCD 2.0 2018 midpoint', 'ecosystem quality', 'freshwater ecotoxicity')	'ATR BM, HT+LT, + CCS (MDEA), 98 (upper bound)' (megajoule, CH, None)	Water supply	3.76329e-05
('ILCD 2.0 2018 midpoint', 'ecosystem quality', 'marine eutrophication')	'ATR BM, HT+LT, + CCS (MDEA), 98 (upper bound)' (megajoule, CH, None)	Catalysts&adsorbents	2.61333e-07
('ILCD 2.0 2018 midpoint', 'ecosystem quality', 'marine eutrophication')	'ATR BM, HT+LT, + CCS (MDEA), 98 (upper bound)' (megajoule, CH, None)	CO2 transport and storage	2.91682e-07
('ILCD 2.0 2018 midpoint', 'ecosystem quality', 'marine eutrophication')	'ATR BM, HT+LT, + CCS (MDEA), 98 (upper bound)' (megajoule, CH, None)	Direct CO2 emissions	0
('ILCD 2.0 2018 midpoint', 'ecosystem quality', 'marine eutrophication')	'ATR BM, HT+LT, + CCS (MDEA), 98 (upper bound)' (megajoule, CH, None)	Electricity from/to grid	3.31343e-06
('ILCD 2.0 2018 midpoint', 'ecosystem quality', 'marine eutrophication')	'ATR BM, HT+LT, + CCS (MDEA), 98 (upper bound)' (megajoule, CH, None)	Emissions from fuel burning in furnace	9.72394e-06
('ILCD 2.0 2018 midpoint', 'ecosystem quality', 'marine eutrophication')	'ATR BM, HT+LT, + CCS (MDEA), 98 (upper bound)' (megajoule, CH, None)	Fuel supply chain	1.03927e-05
('ILCD 2.0 2018 midpoint', 'ecosystem quality', 'marine eutrophication')	'ATR BM, HT+LT, + CCS (MDEA), 98 (upper bound)' (megajoule, CH, None)	Plant infrastructure	8.8364e-07
('ILCD 2.0 2018 midpoint', 'ecosystem quality', 'marine eutrophication')	'ATR BM, HT+LT, + CCS (MDEA), 98 (upper bound)' (megajoule, CH, None)	Water supply	2.40939e-08
('ILCD 2.0 2018 midpoint', 'ecosystem quality', 'terrestrial eutrophication')	'ATR BM, HT+LT, + CCS (MDEA), 98 (upper bound)' (megajoule, CH, None)	Catalysts&adsorbents	3.32642e-06
('ILCD 2.0 2018 midpoint', 'ecosystem quality', 'terrestrial eutrophication')	'ATR BM, HT+LT, + CCS (MDEA), 98 (upper bound)' (megajoule, CH, None)	CO2 transport and storage	2.79166e-06
('ILCD 2.0 2018 midpoint', 'ecosystem quality', 'terrestrial eutrophication')	'ATR BM, HT+LT, + CCS (MDEA), 98 (upper bound)' (megajoule, CH, None)	Direct CO2 emissions	0
('ILCD 2.0 2018 midpoint', 'ecosystem quality', 'terrestrial eutrophication')	'ATR BM, HT+LT, + CCS (MDEA), 98 (upper bound)' (megajoule, CH, None)	Electricity from/to grid	3.07639e-05
('ILCD 2.0 2018 midpoint', 'ecosystem quality', 'terrestrial eutrophication')	'ATR BM, HT+LT, + CCS (MDEA), 98 (upper bound)' (megajoule, CH, None)	Emissions from fuel burning in furnace	0.000106488
('ILCD 2.0 2018 midpoint', 'ecosystem quality', 'terrestrial eutrophication')	'ATR BM, HT+LT, + CCS (MDEA), 98 (upper bound)' (megajoule, CH, None)	Fuel supply chain	0.000183954
('ILCD 2.0 2018 midpoint', 'ecosystem quality', 'terrestrial eutrophication')	'ATR BM, HT+LT, + CCS (MDEA), 98 (upper bound)' (megajoule, CH, None)	Plant infrastructure	1.03808e-05
('ILCD 2.0 2018 midpoint', 'ecosystem quality', 'terrestrial eutrophication')	'ATR BM, HT+LT, + CCS (MDEA), 98 (upper bound)' (megajoule, CH, None)	Water supply	2.44598e-07
('ILCD 2.0 2018 midpoint', 'human health', 'carcinogenic effects')	'ATR BM, HT+LT, + CCS (MDEA), 98 (upper bound)' (megajoule, CH, None)	Catalysts&adsorbents	2.33251e-11
('ILCD 2.0 2018 midpoint', 'human health', 'carcinogenic effects')	'ATR BM, HT+LT, + CCS (MDEA), 98 (upper bound)' (megajoule, CH, None)	CO2 transport and storage	3.69164e-12
('ILCD 2.0 2018 midpoint', 'human health', 'carcinogenic effects')	'ATR BM, HT+LT, + CCS (MDEA), 98 (upper bound)' (megajoule, CH, None)	Direct CO2 emissions	0
('ILCD 2.0 2018 midpoint', 'human health', 'carcinogenic effects')	'ATR BM, HT+LT, + CCS (MDEA), 98 (upper bound)' (megajoule, CH, None)	Electricity from/to grid	2.54083e-11
('ILCD 2.0 2018 midpoint', 'human health', 'carcinogenic effects')	'ATR BM, HT+LT, + CCS (MDEA), 98 (upper bound)' (megajoule, CH, None)	Emissions from fuel burning in furnace	0
('ILCD 2.0 2018 midpoint', 'human health', 'carcinogenic effects')	'ATR BM, HT+LT, + CCS (MDEA), 98 (upper bound)' (megajoule, CH, None)	Fuel supply chain	3.46697e-10
('ILCD 2.0 2018 midpoint', 'human health', 'carcinogenic effects')	'ATR BM, HT+LT, + CCS (MDEA), 98 (upper bound)' (megajoule, CH, None)	Plant infrastructure	7.30488e-11
('ILCD 2.0 2018 midpoint', 'human health', 'carcinogenic effects')	'ATR BM, HT+LT, + CCS (MDEA), 98 (upper bound)' (megajoule, CH, None)	Water supply	9.08745e-13
('ILCD 2.0 2018 midpoint', 'human health', 'ionising radiation')	'ATR BM, HT+LT, + CCS (MDEA), 98 (upper bound)' (megajoule, CH, None)	Catalysts&adsorbents	6.98975e-06
('ILCD 2.0 2018 midpoint', 'human health', 'ionising radiation')	'ATR BM, HT+LT, + CCS (MDEA), 98 (upper bound)' (megajoule, CH, None)	CO2 transport and storage	0.000152354
('ILCD 2.0 2018 midpoint', 'human health', 'ionising radiation')	'ATR BM, HT+LT, + CCS (MDEA), 98 (upper bound)' (megajoule, CH, None)	Direct CO2 emissions	0
('ILCD 2.0 2018 midpoint', 'human health', 'ionising radiation')	'ATR BM, HT+LT, + CCS (MDEA), 98 (upper bound)' (megajoule, CH, None)	Electricity from/to grid	0.00204852
('ILCD 2.0 2018 midpoint', 'human health', 'ionising radiation')	'ATR BM, HT+LT, + CCS (MDEA), 98 (upper bound)' (megajoule, CH, None)	Emissions from fuel burning in furnace	0
('ILCD 2.0 2018 midpoint', 'human health', 'ionising radiation')	'ATR BM, HT+LT, + CCS (MDEA), 98 (upper bound)' (megajoule, CH, None)	Fuel supply chain	0.00206
('ILCD 2.0 2018 midpoint', 'human health', 'ionising radiation')	'ATR BM, HT+LT, + CCS (MDEA), 98 (upper bound)' (megajoule, CH, None)	Plant infrastructure	0.000106411
('ILCD 2.0 2018 midpoint', 'human health', 'ionising radiation')	'ATR BM, HT+LT, + CCS (MDEA), 98 (upper bound)' (megajoule, CH, None)	Water supply	3.82124e-06
('ILCD 2.0 2018 midpoint', 'human health', 'non-carcinogenic effects')	'ATR BM, HT+LT, + CCS (MDEA), 98 (upper bound)' (megajoule, CH, None)	Catalysts&adsorbents	1.68829e-10
('ILCD 2.0 2018 midpoint', 'human health', 'non-carcinogenic effects')	'ATR BM, HT+LT, + CCS (MDEA), 98 (upper bound)' (megajoule, CH, None)	CO2 transport and storage	3.21761e-11
('ILCD 2.0 2018 midpoint', 'human health', 'non-carcinogenic effects')	'ATR BM, HT+LT, + CCS (MDEA), 98 (upper bound)' (megajoule, CH, None)	Direct CO2 emissions	0
('ILCD 2.0 2018 midpoint', 'human health', 'non-carcinogenic effects')	'ATR BM, HT+LT, + CCS (MDEA), 98 (upper bound)' (megajoule, CH, None)	Electricity from/to grid	3.68214e-10
('ILCD 2.0 2018 midpoint', 'human health', 'non-carcinogenic effects')	'ATR BM, HT+LT, + CCS (MDEA), 98 (upper bound)' (megajoule, CH, None)	Emissions from fuel burning in furnace	0
('ILCD 2.0 2018 midpoint', 'human health', 'non-carcinogenic effects')	'ATR BM, HT+LT, + CCS (MDEA), 98 (upper bound)' (megajoule, CH, None)	Fuel supply chain	3.21407e-09
('ILCD 2.0 2018 midpoint', 'human health', 'non-carcinogenic effects')	'ATR BM, HT+LT, + CCS (MDEA), 98 (upper bound)' (megajoule, CH, None)	Plant infrastructure	5.72601e-10
('ILCD 2.0 2018 midpoint', 'human health', 'non-carcinogenic effects')	'ATR BM, HT+LT, + CCS (MDEA), 98 (upper bound)' (megajoule, CH, None)	Water supply	6.85547e-12
('ILCD 2.0 2018 midpoint', 'human health', 'ozone layer depletion')	'ATR BM, HT+LT, + CCS (MDEA), 98 (upper bound)' (megajoule, CH, None)	Catalysts&adsorbents	1.41745e-11
('ILCD 2.0 2018 midpoint', 'human health', 'ozone layer depletion')	'ATR BM, HT+LT, + CCS (MDEA), 98 (upper bound)' (megajoule, CH, None)	CO2 transport and storage	2.47261e-11
('ILCD 2.0 2018 midpoint', 'human health', 'ozone layer depletion')	'ATR BM, HT+LT, + CCS (MDEA), 98 (upper bound)' (megajoule, CH, None)	Direct CO2 emissions	0
('ILCD 2.0 2018 midpoint', 'human health', 'ozone layer depletion')	'ATR BM, HT+LT, + CCS (MDEA), 98 (upper bound)' (megajoule, CH, None)	Electricity from/to grid	3.17315e-10
('ILCD 2.0 2018 midpoint', 'human health', 'ozone layer depletion')	'ATR BM, HT+LT, + CCS (MDEA), 98 (upper bound)' (megajoule, CH, None)	Emissions from fuel burning in furnace	0
('ILCD 2.0 2018 midpoint', 'human health', 'ozone layer depletion')	'ATR BM, HT+LT, + CCS (MDEA), 98 (upper bound)' (megajoule, CH, None)	Fuel supply chain	9.73203e-10
('ILCD 2.0 2018 midpoint', 'human health', 'ozone layer depletion')	'ATR BM, HT+LT, + CCS (MDEA), 98 (upper bound)' (megajoule, CH, None)	Plant infrastructure	4.70935e-11
('ILCD 2.0 2018 midpoint', 'human health', 'ozone layer depletion')	'ATR BM, HT+LT, + CCS (MDEA), 98 (upper bound)' (megajoule, CH, None)	Water supply	1.53782e-11
('ILCD 2.0 2018 midpoint', 'human health', 'photochemical ozone creation')	'ATR BM, HT+LT, + CCS (MDEA), 98 (upper bound)' (megajoule, CH, None)	Catalysts&adsorbents	1.13609e-06
('ILCD 2.0 2018 midpoint', 'human health', 'photochemical ozone creation')	'ATR BM, HT+LT, + CCS (MDEA), 98 (upper bound)' (megajoule, CH, None)	CO2 transport and storage	7.16988e-07
('ILCD 2.0 2018 midpoint', 'human health', 'photochemical ozone creation')	'ATR BM, HT+LT, + CCS (MDEA), 98 (upper bound)' (megajoule, CH, None)	Direct CO2 emissions	0
('ILCD 2.0 2018 midpoint', 'human health', 'photochemical ozone creation')	'ATR BM, HT+LT, + CCS (MDEA), 98 (upper bound)' (megajoule, CH, None)	Electricity from/to grid	7.62931e-06
('ILCD 2.0 2018 midpoint', 'human health', 'photochemical ozone creation')	'ATR BM, HT+LT, + CCS (MDEA), 98 (upper bound)' (megajoule, CH, None)	Emissions from fuel burning in furnace	2.49973e-05
('ILCD 2.0 2018 midpoint', 'human health', 'photochemical ozone creation')	'ATR BM, HT+LT, + CCS (MDEA), 98 (upper bound)' (megajoule, CH, None)	Fuel supply chain	3.26026e-05
('ILCD 2.0 2018 midpoint', 'human health', 'photochemical ozone creation')	'ATR BM, HT+LT, + CCS (MDEA), 98 (upper bound)' (megajoule, CH, None)	Plant infrastructure	2.97279e-06
('ILCD 2.0 2018 midpoint', 'human health', 'photochemical ozone creation')	'ATR BM, HT+LT, + CCS (MDEA), 98 (upper bound)' (megajoule, CH, None)	Water supply	7.74425e-08
('ILCD 2.0 2018 midpoint', 'human health', 'respiratory effects, inorganics')	'ATR BM, HT+LT, + CCS (MDEA), 98 (upper bound)' (megajoule, CH, None)	Catalysts&adsorbents	1.47568e-11
('ILCD 2.0 2018 midpoint', 'human health', 'respiratory effects, inorganics')	'ATR BM, HT+LT, + CCS (MDEA), 98 (upper bound)' (megajoule, CH, None)	CO2 transport and storage	5.53135e-12
('ILCD 2.0 2018 midpoint', 'human health', 'respiratory effects, inorganics')	'ATR BM, HT+LT, + CCS (MDEA), 98 (upper bound)' (megajoule, CH, None)	Direct CO2 emissions	0
('ILCD 2.0 2018 midpoint', 'human health', 'respiratory effects, inorganics')	'ATR BM, HT+LT, + CCS (MDEA), 98 (upper bound)' (megajoule, CH, None)	Electricity from/to grid	5.61062e-11
('ILCD 2.0 2018 midpoint', 'human health', 'respiratory effects, inorganics')	'ATR BM, HT+LT, + CCS (MDEA), 98 (upper bound)' (megajoule, CH, None)	Emissions from fuel burning in furnace	3.99956e-11
('ILCD 2.0 2018 midpoint', 'human health', 'respiratory effects, inorganics')	'ATR BM, HT+LT, + CCS (MDEA), 98 (upper bound)' (megajoule, CH, None)	Fuel supply chain	8.9363e-10
('ILCD 2.0 2018 midpoint', 'human health', 'respiratory effects, inorganics')	'ATR BM, HT+LT, + CCS (MDEA), 98 (upper bound)' (megajoule, CH, None)	Plant infrastructure	4.70314e-11
('ILCD 2.0 2018 midpoint', 'human health', 'respiratory effects, inorganics')	'ATR BM, HT+LT, + CCS (MDEA), 98 (upper bound)' (megajoule, CH, None)	Water supply	1.74323e-12
('ILCD 2.0 2018 midpoint', 'resources', 'fossils')	'ATR BM, HT+LT, + CCS (MDEA), 98 (upper bound)' (megajoule, CH, None)	Catalysts&adsorbents	0.00139382
('ILCD 2.0 2018 midpoint', 'resources', 'fossils')	'ATR BM, HT+LT, + CCS (MDEA), 98 (upper bound)' (megajoule, CH, None)	CO2 transport and storage	0.0065887
('ILCD 2.0 2018 midpoint', 'resources', 'fossils')	'ATR BM, HT+LT, + CCS (MDEA), 98 (upper bound)' (megajoule, CH, None)	Direct CO2 emissions	0
('ILCD 2.0 2018 midpoint', 'resources', 'fossils')	'ATR BM, HT+LT, + CCS (MDEA), 98 (upper bound)' (megajoule, CH, None)	Electricity from/to grid	0.0862859
('ILCD 2.0 2018 midpoint', 'resources', 'fossils')	'ATR BM, HT+LT, + CCS (MDEA), 98 (upper bound)' (megajoule, CH, None)	Emissions from fuel burning in furnace	0
('ILCD 2.0 2018 midpoint', 'resources', 'fossils')	'ATR BM, HT+LT, + CCS (MDEA), 98 (upper bound)' (megajoule, CH, None)	Fuel supply chain	0.158317
('ILCD 2.0 2018 midpoint', 'resources', 'fossils')	'ATR BM, HT+LT, + CCS (MDEA), 98 (upper bound)' (megajoule, CH, None)	Plant infrastructure	0.00956902
('ILCD 2.0 2018 midpoint', 'resources', 'fossils')	'ATR BM, HT+LT, + CCS (MDEA), 98 (upper bound)' (megajoule, CH, None)	Water supply	0.000352254
('ILCD 2.0 2018 midpoint', 'resources', 'land use')	'ATR BM, HT+LT, + CCS (MDEA), 98 (upper bound)' (megajoule, CH, None)	Catalysts&adsorbents	0.00115171
('ILCD 2.0 2018 midpoint', 'resources', 'land use')	'ATR BM, HT+LT, + CCS (MDEA), 98 (upper bound)' (megajoule, CH, None)	CO2 transport and storage	0.00269994
('ILCD 2.0 2018 midpoint', 'resources', 'land use')	'ATR BM, HT+LT, + CCS (MDEA), 98 (upper bound)' (megajoule, CH, None)	Direct CO2 emissions	0
('ILCD 2.0 2018 midpoint', 'resources', 'land use')	'ATR BM, HT+LT, + CCS (MDEA), 98 (upper bound)' (megajoule, CH, None)	Electricity from/to grid	0.0379207
('ILCD 2.0 2018 midpoint', 'resources', 'land use')	'ATR BM, HT+LT, + CCS (MDEA), 98 (upper bound)' (megajoule, CH, None)	Emissions from fuel burning in furnace	0
('ILCD 2.0 2018 midpoint', 'resources', 'land use')	'ATR BM, HT+LT, + CCS (MDEA), 98 (upper bound)' (megajoule, CH, None)	Fuel supply chain	0.14078
('ILCD 2.0 2018 midpoint', 'resources', 'land use')	'ATR BM, HT+LT, + CCS (MDEA), 98 (upper bound)' (megajoule, CH, None)	Plant infrastructure	0.0215588
('ILCD 2.0 2018 midpoint', 'resources', 'land use')	'ATR BM, HT+LT, + CCS (MDEA), 98 (upper bound)' (megajoule, CH, None)	Water supply	0.000178245
('ILCD 2.0 2018 midpoint', 'resources', 'minerals and metals')	'ATR BM, HT+LT, + CCS (MDEA), 98 (upper bound)' (megajoule, CH, None)	Catalysts&adsorbents	1.56083e-08
('ILCD 2.0 2018 midpoint', 'resources', 'minerals and metals')	'ATR BM, HT+LT, + CCS (MDEA), 98 (upper bound)' (megajoule, CH, None)	CO2 transport and storage	8.87035e-10
('ILCD 2.0 2018 midpoint', 'resources', 'minerals and metals')	'ATR BM, HT+LT, + CCS (MDEA), 98 (upper bound)' (megajoule, CH, None)	Direct CO2 emissions	0
('ILCD 2.0 2018 midpoint', 'resources', 'minerals and metals')	'ATR BM, HT+LT, + CCS (MDEA), 98 (upper bound)' (megajoule, CH, None)	Electricity from/to grid	8.61122e-09
('ILCD 2.0 2018 midpoint', 'resources', 'minerals and metals')	'ATR BM, HT+LT, + CCS (MDEA), 98 (upper bound)' (megajoule, CH, None)	Emissions from fuel burning in furnace	0
('ILCD 2.0 2018 midpoint', 'resources', 'minerals and metals')	'ATR BM, HT+LT, + CCS (MDEA), 98 (upper bound)' (megajoule, CH, None)	Fuel supply chain	1.24661e-06
('ILCD 2.0 2018 midpoint', 'resources', 'minerals and metals')	'ATR BM, HT+LT, + CCS (MDEA), 98 (upper bound)' (megajoule, CH, None)	Plant infrastructure	1.81183e-07
('ILCD 2.0 2018 midpoint', 'resources', 'minerals and metals')	'ATR BM, HT+LT, + CCS (MDEA), 98 (upper bound)' (megajoule, CH, None)	Water supply	6.76658e-10
('ReCiPe Midpoint (H) V1.13', 'metal depletion', 'MDP')	'ATR BM, HT+LT, + CCS (MDEA), 98 (upper bound)' (megajoule, CH, None)	Catalysts&adsorbents	0.000283553
('ReCiPe Midpoint (H) V1.13', 'metal depletion', 'MDP')	'ATR BM, HT+LT, + CCS (MDEA), 98 (upper bound)' (megajoule, CH, None)	CO2 transport and storage	3.90566e-06
('ReCiPe Midpoint (H) V1.13', 'metal depletion', 'MDP')	'ATR BM, HT+LT, + CCS (MDEA), 98 (upper bound)' (megajoule, CH, None)	Direct CO2 emissions	0
('ReCiPe Midpoint (H) V1.13', 'metal depletion', 'MDP')	'ATR BM, HT+LT, + CCS (MDEA), 98 (upper bound)' (megajoule, CH, None)	Electricity from/to grid	3.09279e-05
('ReCiPe Midpoint (H) V1.13', 'metal depletion', 'MDP')	'ATR BM, HT+LT, + CCS (MDEA), 98 (upper bound)' (megajoule, CH, None)	Emissions from fuel burning in furnace	0
('ReCiPe Midpoint (H) V1.13', 'metal depletion', 'MDP')	'ATR BM, HT+LT, + CCS (MDEA), 98 (upper bound)' (megajoule, CH, None)	Fuel supply chain	0.00318383
('ReCiPe Midpoint (H) V1.13', 'metal depletion', 'MDP')	'ATR BM, HT+LT, + CCS (MDEA), 98 (upper bound)' (megajoule, CH, None)	Plant infrastructure	0.000575174
('ReCiPe Midpoint (H) V1.13', 'metal depletion', 'MDP')	'ATR BM, HT+LT, + CCS (MDEA), 98 (upper bound)' (megajoule, CH, None)	Water supply	2.07628e-06
('cumulative energy demand', 'fossil', 'non-renewable energy resources, fossil')	'ATR BM, HT+LT, + CCS (VPSA), 98 (average)' (megajoule, CH, None)	Catalysts&adsorbents	0.00104087
('cumulative energy demand', 'fossil', 'non-renewable energy resources, fossil')	'ATR BM, HT+LT, + CCS (VPSA), 98 (average)' (megajoule, CH, None)	CO2 transport and storage	0.00356432
('cumulative energy demand', 'fossil', 'non-renewable energy resources, fossil')	'ATR BM, HT+LT, + CCS (VPSA), 98 (average)' (megajoule, CH, None)	Direct CO2 emissions	0
('cumulative energy demand', 'fossil', 'non-renewable energy resources, fossil')	'ATR BM, HT+LT, + CCS (VPSA), 98 (average)' (megajoule, CH, None)	Electricity from/to grid	0.0636453
('cumulative energy demand', 'fossil', 'non-renewable energy resources, fossil')	'ATR BM, HT+LT, + CCS (VPSA), 98 (average)' (megajoule, CH, None)	Emissions from fuel burning in furnace	0
('cumulative energy demand', 'fossil', 'non-renewable energy resources, fossil')	'ATR BM, HT+LT, + CCS (VPSA), 98 (average)' (megajoule, CH, None)	Fuel supply chain	0.117524
('cumulative energy demand', 'fossil', 'non-renewable energy resources, fossil')	'ATR BM, HT+LT, + CCS (VPSA), 98 (average)' (megajoule, CH, None)	Plant infrastructure	0.00693805
('cumulative energy demand', 'fossil', 'non-renewable energy resources, fossil')	'ATR BM, HT+LT, + CCS (VPSA), 98 (average)' (megajoule, CH, None)	Water supply	0.000277398
('cumulative energy demand', 'nuclear', 'non-renewable energy resources, nuclear')	'ATR BM, HT+LT, + CCS (VPSA), 98 (average)' (megajoule, CH, None)	Catalysts&adsorbents	8.69457e-05
('cumulative energy demand', 'nuclear', 'non-renewable energy resources, nuclear')	'ATR BM, HT+LT, + CCS (VPSA), 98 (average)' (megajoule, CH, None)	CO2 transport and storage	0.00269673
('cumulative energy demand', 'nuclear', 'non-renewable energy resources, nuclear')	'ATR BM, HT+LT, + CCS (VPSA), 98 (average)' (megajoule, CH, None)	Direct CO2 emissions	0
('cumulative energy demand', 'nuclear', 'non-renewable energy resources, nuclear')	'ATR BM, HT+LT, + CCS (VPSA), 98 (average)' (megajoule, CH, None)	Electricity from/to grid	0.0502216
('cumulative energy demand', 'nuclear', 'non-renewable energy resources, nuclear')	'ATR BM, HT+LT, + CCS (VPSA), 98 (average)' (megajoule, CH, None)	Emissions from fuel burning in furnace	0
('cumulative energy demand', 'nuclear', 'non-renewable energy resources, nuclear')	'ATR BM, HT+LT, + CCS (VPSA), 98 (average)' (megajoule, CH, None)	Fuel supply chain	0.0313494
('cumulative energy demand', 'nuclear', 'non-renewable energy resources, nuclear')	'ATR BM, HT+LT, + CCS (VPSA), 98 (average)' (megajoule, CH, None)	Plant infrastructure	0.00171997
('cumulative energy demand', 'nuclear', 'non-renewable energy resources, nuclear')	'ATR BM, HT+LT, + CCS (VPSA), 98 (average)' (megajoule, CH, None)	Water supply	5.8647e-05
('cumulative energy demand', 'primary forest', 'non-renewable energy resources, primary forest')	'ATR BM, HT+LT, + CCS (VPSA), 98 (average)' (megajoule, CH, None)	Catalysts&adsorbents	2.14448e-08
('cumulative energy demand', 'primary forest', 'non-renewable energy resources, primary forest')	'ATR BM, HT+LT, + CCS (VPSA), 98 (average)' (megajoule, CH, None)	CO2 transport and storage	5.24757e-08
('cumulative energy demand', 'primary forest', 'non-renewable energy resources, primary forest')	'ATR BM, HT+LT, + CCS (VPSA), 98 (average)' (megajoule, CH, None)	Direct CO2 emissions	0
('cumulative energy demand', 'primary forest', 'non-renewable energy resources, primary forest')	'ATR BM, HT+LT, + CCS (VPSA), 98 (average)' (megajoule, CH, None)	Electricity from/to grid	4.42935e-07
('cumulative energy demand', 'primary forest', 'non-renewable energy resources, primary forest')	'ATR BM, HT+LT, + CCS (VPSA), 98 (average)' (megajoule, CH, None)	Emissions from fuel burning in furnace	0
('cumulative energy demand', 'primary forest', 'non-renewable energy resources, primary forest')	'ATR BM, HT+LT, + CCS (VPSA), 98 (average)' (megajoule, CH, None)	Fuel supply chain	2.09238e-06
('cumulative energy demand', 'primary forest', 'non-renewable energy resources, primary forest')	'ATR BM, HT+LT, + CCS (VPSA), 98 (average)' (megajoule, CH, None)	Plant infrastructure	3.70972e-07
('cumulative energy demand', 'primary forest', 'non-renewable energy resources, primary forest')	'ATR BM, HT+LT, + CCS (VPSA), 98 (average)' (megajoule, CH, None)	Water supply	4.68061e-09
('ILCD 2.0 2018 midpoint', 'climate change', 'climate change total')	'ATR BM, HT+LT, + CCS (VPSA), 98 (average)' (megajoule, CH, None)	Catalysts&adsorbents	9.12173e-05
('ILCD 2.0 2018 midpoint', 'climate change', 'climate change total')	'ATR BM, HT+LT, + CCS (VPSA), 98 (average)' (megajoule, CH, None)	CO2 transport and storage	0.000293554
('ILCD 2.0 2018 midpoint', 'climate change', 'climate change total')	'ATR BM, HT+LT, + CCS (VPSA), 98 (average)' (megajoule, CH, None)	Direct CO2 emissions	0.0014239
('ILCD 2.0 2018 midpoint', 'climate change', 'climate change total')	'ATR BM, HT+LT, + CCS (VPSA), 98 (average)' (megajoule, CH, None)	Electricity from/to grid	0.00526943
('ILCD 2.0 2018 midpoint', 'climate change', 'climate change total')	'ATR BM, HT+LT, + CCS (VPSA), 98 (average)' (megajoule, CH, None)	Emissions from fuel burning in furnace	0
('ILCD 2.0 2018 midpoint', 'climate change', 'climate change total')	'ATR BM, HT+LT, + CCS (VPSA), 98 (average)' (megajoule, CH, None)	Fuel supply chain	-0.100877
('ILCD 2.0 2018 midpoint', 'climate change', 'climate change total')	'ATR BM, HT+LT, + CCS (VPSA), 98 (average)' (megajoule, CH, None)	Plant infrastructure	0.000631278
('ILCD 2.0 2018 midpoint', 'climate change', 'climate change total')	'ATR BM, HT+LT, + CCS (VPSA), 98 (average)' (megajoule, CH, None)	Water supply	2.27992e-05
('ILCD 2.0 2018 midpoint', 'ecosystem quality', 'freshwater and terrestrial acidification')	'ATR BM, HT+LT, + CCS (VPSA), 98 (average)' (megajoule, CH, None)	Catalysts&adsorbents	7.85337e-06
('ILCD 2.0 2018 midpoint', 'ecosystem quality', 'freshwater and terrestrial acidification')	'ATR BM, HT+LT, + CCS (VPSA), 98 (average)' (megajoule, CH, None)	CO2 transport and storage	1.6434e-06
('ILCD 2.0 2018 midpoint', 'ecosystem quality', 'freshwater and terrestrial acidification')	'ATR BM, HT+LT, + CCS (VPSA), 98 (average)' (megajoule, CH, None)	Direct CO2 emissions	0
('ILCD 2.0 2018 midpoint', 'ecosystem quality', 'freshwater and terrestrial acidification')	'ATR BM, HT+LT, + CCS (VPSA), 98 (average)' (megajoule, CH, None)	Electricity from/to grid	2.72611e-05
('ILCD 2.0 2018 midpoint', 'ecosystem quality', 'freshwater and terrestrial acidification')	'ATR BM, HT+LT, + CCS (VPSA), 98 (average)' (megajoule, CH, None)	Emissions from fuel burning in furnace	1.8498e-05
('ILCD 2.0 2018 midpoint', 'ecosystem quality', 'freshwater and terrestrial acidification')	'ATR BM, HT+LT, + CCS (VPSA), 98 (average)' (megajoule, CH, None)	Fuel supply chain	0.000125693
('ILCD 2.0 2018 midpoint', 'ecosystem quality', 'freshwater and terrestrial acidification')	'ATR BM, HT+LT, + CCS (VPSA), 98 (average)' (megajoule, CH, None)	Plant infrastructure	7.89889e-06
('ILCD 2.0 2018 midpoint', 'ecosystem quality', 'freshwater and terrestrial acidification')	'ATR BM, HT+LT, + CCS (VPSA), 98 (average)' (megajoule, CH, None)	Water supply	2.47424e-07
('ILCD 2.0 2018 midpoint', 'ecosystem quality', 'freshwater ecotoxicity')	'ATR BM, HT+LT, + CCS (VPSA), 98 (average)' (megajoule, CH, None)	Catalysts&adsorbents	0.000628182
('ILCD 2.0 2018 midpoint', 'ecosystem quality', 'freshwater ecotoxicity')	'ATR BM, HT+LT, + CCS (VPSA), 98 (average)' (megajoule, CH, None)	CO2 transport and storage	9.93802e-05
('ILCD 2.0 2018 midpoint', 'ecosystem quality', 'freshwater ecotoxicity')	'ATR BM, HT+LT, + CCS (VPSA), 98 (average)' (megajoule, CH, None)	Direct CO2 emissions	0
('ILCD 2.0 2018 midpoint', 'ecosystem quality', 'freshwater ecotoxicity')	'ATR BM, HT+LT, + CCS (VPSA), 98 (average)' (megajoule, CH, None)	Electricity from/to grid	0.00132705
('ILCD 2.0 2018 midpoint', 'ecosystem quality', 'freshwater ecotoxicity')	'ATR BM, HT+LT, + CCS (VPSA), 98 (average)' (megajoule, CH, None)	Emissions from fuel burning in furnace	0
('ILCD 2.0 2018 midpoint', 'ecosystem quality', 'freshwater ecotoxicity')	'ATR BM, HT+LT, + CCS (VPSA), 98 (average)' (megajoule, CH, None)	Fuel supply chain	0.0123717
('ILCD 2.0 2018 midpoint', 'ecosystem quality', 'freshwater ecotoxicity')	'ATR BM, HT+LT, + CCS (VPSA), 98 (average)' (megajoule, CH, None)	Plant infrastructure	0.00217871
('ILCD 2.0 2018 midpoint', 'ecosystem quality', 'freshwater ecotoxicity')	'ATR BM, HT+LT, + CCS (VPSA), 98 (average)' (megajoule, CH, None)	Water supply	3.76328e-05
('ILCD 2.0 2018 midpoint', 'ecosystem quality', 'marine eutrophication')	'ATR BM, HT+LT, + CCS (VPSA), 98 (average)' (megajoule, CH, None)	Catalysts&adsorbents	2.43506e-07
('ILCD 2.0 2018 midpoint', 'ecosystem quality', 'marine eutrophication')	'ATR BM, HT+LT, + CCS (VPSA), 98 (average)' (megajoule, CH, None)	CO2 transport and storage	2.98923e-07
('ILCD 2.0 2018 midpoint', 'ecosystem quality', 'marine eutrophication')	'ATR BM, HT+LT, + CCS (VPSA), 98 (average)' (megajoule, CH, None)	Direct CO2 emissions	0
('ILCD 2.0 2018 midpoint', 'ecosystem quality', 'marine eutrophication')	'ATR BM, HT+LT, + CCS (VPSA), 98 (average)' (megajoule, CH, None)	Electricity from/to grid	4.71103e-06
('ILCD 2.0 2018 midpoint', 'ecosystem quality', 'marine eutrophication')	'ATR BM, HT+LT, + CCS (VPSA), 98 (average)' (megajoule, CH, None)	Emissions from fuel burning in furnace	9.72394e-06
('ILCD 2.0 2018 midpoint', 'ecosystem quality', 'marine eutrophication')	'ATR BM, HT+LT, + CCS (VPSA), 98 (average)' (megajoule, CH, None)	Fuel supply chain	1.04441e-05
('ILCD 2.0 2018 midpoint', 'ecosystem quality', 'marine eutrophication')	'ATR BM, HT+LT, + CCS (VPSA), 98 (average)' (megajoule, CH, None)	Plant infrastructure	8.83638e-07
('ILCD 2.0 2018 midpoint', 'ecosystem quality', 'marine eutrophication')	'ATR BM, HT+LT, + CCS (VPSA), 98 (average)' (megajoule, CH, None)	Water supply	2.40939e-08
('ILCD 2.0 2018 midpoint', 'ecosystem quality', 'terrestrial eutrophication')	'ATR BM, HT+LT, + CCS (VPSA), 98 (average)' (megajoule, CH, None)	Catalysts&adsorbents	3.26269e-06
('ILCD 2.0 2018 midpoint', 'ecosystem quality', 'terrestrial eutrophication')	'ATR BM, HT+LT, + CCS (VPSA), 98 (average)' (megajoule, CH, None)	CO2 transport and storage	2.86096e-06
('ILCD 2.0 2018 midpoint', 'ecosystem quality', 'terrestrial eutrophication')	'ATR BM, HT+LT, + CCS (VPSA), 98 (average)' (megajoule, CH, None)	Direct CO2 emissions	0
('ILCD 2.0 2018 midpoint', 'ecosystem quality', 'terrestrial eutrophication')	'ATR BM, HT+LT, + CCS (VPSA), 98 (average)' (megajoule, CH, None)	Electricity from/to grid	4.37401e-05
('ILCD 2.0 2018 midpoint', 'ecosystem quality', 'terrestrial eutrophication')	'ATR BM, HT+LT, + CCS (VPSA), 98 (average)' (megajoule, CH, None)	Emissions from fuel burning in furnace	0.000106488
('ILCD 2.0 2018 midpoint', 'ecosystem quality', 'terrestrial eutrophication')	'ATR BM, HT+LT, + CCS (VPSA), 98 (average)' (megajoule, CH, None)	Fuel supply chain	0.000184863
('ILCD 2.0 2018 midpoint', 'ecosystem quality', 'terrestrial eutrophication')	'ATR BM, HT+LT, + CCS (VPSA), 98 (average)' (megajoule, CH, None)	Plant infrastructure	1.03808e-05
('ILCD 2.0 2018 midpoint', 'ecosystem quality', 'terrestrial eutrophication')	'ATR BM, HT+LT, + CCS (VPSA), 98 (average)' (megajoule, CH, None)	Water supply	2.44597e-07
('ILCD 2.0 2018 midpoint', 'human health', 'carcinogenic effects')	'ATR BM, HT+LT, + CCS (VPSA), 98 (average)' (megajoule, CH, None)	Catalysts&adsorbents	2.32399e-11
('ILCD 2.0 2018 midpoint', 'human health', 'carcinogenic effects')	'ATR BM, HT+LT, + CCS (VPSA), 98 (average)' (megajoule, CH, None)	CO2 transport and storage	3.78328e-12
('ILCD 2.0 2018 midpoint', 'human health', 'carcinogenic effects')	'ATR BM, HT+LT, + CCS (VPSA), 98 (average)' (megajoule, CH, None)	Direct CO2 emissions	0
('ILCD 2.0 2018 midpoint', 'human health', 'carcinogenic effects')	'ATR BM, HT+LT, + CCS (VPSA), 98 (average)' (megajoule, CH, None)	Electricity from/to grid	3.61255e-11
('ILCD 2.0 2018 midpoint', 'human health', 'carcinogenic effects')	'ATR BM, HT+LT, + CCS (VPSA), 98 (average)' (megajoule, CH, None)	Emissions from fuel burning in furnace	0
('ILCD 2.0 2018 midpoint', 'human health', 'carcinogenic effects')	'ATR BM, HT+LT, + CCS (VPSA), 98 (average)' (megajoule, CH, None)	Fuel supply chain	3.48412e-10
('ILCD 2.0 2018 midpoint', 'human health', 'carcinogenic effects')	'ATR BM, HT+LT, + CCS (VPSA), 98 (average)' (megajoule, CH, None)	Plant infrastructure	7.30486e-11
('ILCD 2.0 2018 midpoint', 'human health', 'carcinogenic effects')	'ATR BM, HT+LT, + CCS (VPSA), 98 (average)' (megajoule, CH, None)	Water supply	9.08743e-13
('ILCD 2.0 2018 midpoint', 'human health', 'ionising radiation')	'ATR BM, HT+LT, + CCS (VPSA), 98 (average)' (megajoule, CH, None)	Catalysts&adsorbents	6.50284e-06
('ILCD 2.0 2018 midpoint', 'human health', 'ionising radiation')	'ATR BM, HT+LT, + CCS (VPSA), 98 (average)' (megajoule, CH, None)	CO2 transport and storage	0.000156136
('ILCD 2.0 2018 midpoint', 'human health', 'ionising radiation')	'ATR BM, HT+LT, + CCS (VPSA), 98 (average)' (megajoule, CH, None)	Direct CO2 emissions	0
('ILCD 2.0 2018 midpoint', 'human health', 'ionising radiation')	'ATR BM, HT+LT, + CCS (VPSA), 98 (average)' (megajoule, CH, None)	Electricity from/to grid	0.00291259
('ILCD 2.0 2018 midpoint', 'human health', 'ionising radiation')	'ATR BM, HT+LT, + CCS (VPSA), 98 (average)' (megajoule, CH, None)	Emissions from fuel burning in furnace	0
('ILCD 2.0 2018 midpoint', 'human health', 'ionising radiation')	'ATR BM, HT+LT, + CCS (VPSA), 98 (average)' (megajoule, CH, None)	Fuel supply chain	0.00207019
('ILCD 2.0 2018 midpoint', 'human health', 'ionising radiation')	'ATR BM, HT+LT, + CCS (VPSA), 98 (average)' (megajoule, CH, None)	Plant infrastructure	0.00010641
('ILCD 2.0 2018 midpoint', 'human health', 'ionising radiation')	'ATR BM, HT+LT, + CCS (VPSA), 98 (average)' (megajoule, CH, None)	Water supply	3.82122e-06
('ILCD 2.0 2018 midpoint', 'human health', 'non-carcinogenic effects')	'ATR BM, HT+LT, + CCS (VPSA), 98 (average)' (megajoule, CH, None)	Catalysts&adsorbents	1.68319e-10
('ILCD 2.0 2018 midpoint', 'human health', 'non-carcinogenic effects')	'ATR BM, HT+LT, + CCS (VPSA), 98 (average)' (megajoule, CH, None)	CO2 transport and storage	3.29749e-11
('ILCD 2.0 2018 midpoint', 'human health', 'non-carcinogenic effects')	'ATR BM, HT+LT, + CCS (VPSA), 98 (average)' (megajoule, CH, None)	Direct CO2 emissions	0
('ILCD 2.0 2018 midpoint', 'human health', 'non-carcinogenic effects')	'ATR BM, HT+LT, + CCS (VPSA), 98 (average)' (megajoule, CH, None)	Electricity from/to grid	5.23526e-10
('ILCD 2.0 2018 midpoint', 'human health', 'non-carcinogenic effects')	'ATR BM, HT+LT, + CCS (VPSA), 98 (average)' (megajoule, CH, None)	Emissions from fuel burning in furnace	0
('ILCD 2.0 2018 midpoint', 'human health', 'non-carcinogenic effects')	'ATR BM, HT+LT, + CCS (VPSA), 98 (average)' (megajoule, CH, None)	Fuel supply chain	3.22996e-09
('ILCD 2.0 2018 midpoint', 'human health', 'non-carcinogenic effects')	'ATR BM, HT+LT, + CCS (VPSA), 98 (average)' (megajoule, CH, None)	Plant infrastructure	5.72599e-10
('ILCD 2.0 2018 midpoint', 'human health', 'non-carcinogenic effects')	'ATR BM, HT+LT, + CCS (VPSA), 98 (average)' (megajoule, CH, None)	Water supply	6.85545e-12
('ILCD 2.0 2018 midpoint', 'human health', 'ozone layer depletion')	'ATR BM, HT+LT, + CCS (VPSA), 98 (average)' (megajoule, CH, None)	Catalysts&adsorbents	1.38511e-11
('ILCD 2.0 2018 midpoint', 'human health', 'ozone layer depletion')	'ATR BM, HT+LT, + CCS (VPSA), 98 (average)' (megajoule, CH, None)	CO2 transport and storage	2.53399e-11
('ILCD 2.0 2018 midpoint', 'human health', 'ozone layer depletion')	'ATR BM, HT+LT, + CCS (VPSA), 98 (average)' (megajoule, CH, None)	Direct CO2 emissions	0
('ILCD 2.0 2018 midpoint', 'human health', 'ozone layer depletion')	'ATR BM, HT+LT, + CCS (VPSA), 98 (average)' (megajoule, CH, None)	Electricity from/to grid	4.51158e-10
('ILCD 2.0 2018 midpoint', 'human health', 'ozone layer depletion')	'ATR BM, HT+LT, + CCS (VPSA), 98 (average)' (megajoule, CH, None)	Emissions from fuel burning in furnace	0
('ILCD 2.0 2018 midpoint', 'human health', 'ozone layer depletion')	'ATR BM, HT+LT, + CCS (VPSA), 98 (average)' (megajoule, CH, None)	Fuel supply chain	9.78015e-10
('ILCD 2.0 2018 midpoint', 'human health', 'ozone layer depletion')	'ATR BM, HT+LT, + CCS (VPSA), 98 (average)' (megajoule, CH, None)	Plant infrastructure	4.70934e-11
('ILCD 2.0 2018 midpoint', 'human health', 'ozone layer depletion')	'ATR BM, HT+LT, + CCS (VPSA), 98 (average)' (megajoule, CH, None)	Water supply	1.53781e-11
('ILCD 2.0 2018 midpoint', 'human health', 'photochemical ozone creation')	'ATR BM, HT+LT, + CCS (VPSA), 98 (average)' (megajoule, CH, None)	Catalysts&adsorbents	1.11653e-06
('ILCD 2.0 2018 midpoint', 'human health', 'photochemical ozone creation')	'ATR BM, HT+LT, + CCS (VPSA), 98 (average)' (megajoule, CH, None)	CO2 transport and storage	7.34787e-07
('ILCD 2.0 2018 midpoint', 'human health', 'photochemical ozone creation')	'ATR BM, HT+LT, + CCS (VPSA), 98 (average)' (megajoule, CH, None)	Direct CO2 emissions	0
('ILCD 2.0 2018 midpoint', 'human health', 'photochemical ozone creation')	'ATR BM, HT+LT, + CCS (VPSA), 98 (average)' (megajoule, CH, None)	Electricity from/to grid	1.08473e-05
('ILCD 2.0 2018 midpoint', 'human health', 'photochemical ozone creation')	'ATR BM, HT+LT, + CCS (VPSA), 98 (average)' (megajoule, CH, None)	Emissions from fuel burning in furnace	2.49973e-05
('ILCD 2.0 2018 midpoint', 'human health', 'photochemical ozone creation')	'ATR BM, HT+LT, + CCS (VPSA), 98 (average)' (megajoule, CH, None)	Fuel supply chain	3.27638e-05
('ILCD 2.0 2018 midpoint', 'human health', 'photochemical ozone creation')	'ATR BM, HT+LT, + CCS (VPSA), 98 (average)' (megajoule, CH, None)	Plant infrastructure	2.97279e-06
('ILCD 2.0 2018 midpoint', 'human health', 'photochemical ozone creation')	'ATR BM, HT+LT, + CCS (VPSA), 98 (average)' (megajoule, CH, None)	Water supply	7.74423e-08
('ILCD 2.0 2018 midpoint', 'human health', 'respiratory effects, inorganics')	'ATR BM, HT+LT, + CCS (VPSA), 98 (average)' (megajoule, CH, None)	Catalysts&adsorbents	1.45044e-11
('ILCD 2.0 2018 midpoint', 'human health', 'respiratory effects, inorganics')	'ATR BM, HT+LT, + CCS (VPSA), 98 (average)' (megajoule, CH, None)	CO2 transport and storage	5.66866e-12
('ILCD 2.0 2018 midpoint', 'human health', 'respiratory effects, inorganics')	'ATR BM, HT+LT, + CCS (VPSA), 98 (average)' (megajoule, CH, None)	Direct CO2 emissions	0
('ILCD 2.0 2018 midpoint', 'human health', 'respiratory effects, inorganics')	'ATR BM, HT+LT, + CCS (VPSA), 98 (average)' (megajoule, CH, None)	Electricity from/to grid	7.97718e-11
('ILCD 2.0 2018 midpoint', 'human health', 'respiratory effects, inorganics')	'ATR BM, HT+LT, + CCS (VPSA), 98 (average)' (megajoule, CH, None)	Emissions from fuel burning in furnace	3.99956e-11
('ILCD 2.0 2018 midpoint', 'human health', 'respiratory effects, inorganics')	'ATR BM, HT+LT, + CCS (VPSA), 98 (average)' (megajoule, CH, None)	Fuel supply chain	8.98048e-10
('ILCD 2.0 2018 midpoint', 'human health', 'respiratory effects, inorganics')	'ATR BM, HT+LT, + CCS (VPSA), 98 (average)' (megajoule, CH, None)	Plant infrastructure	4.70312e-11
('ILCD 2.0 2018 midpoint', 'human health', 'respiratory effects, inorganics')	'ATR BM, HT+LT, + CCS (VPSA), 98 (average)' (megajoule, CH, None)	Water supply	1.74322e-12
('ILCD 2.0 2018 midpoint', 'resources', 'fossils')	'ATR BM, HT+LT, + CCS (VPSA), 98 (average)' (megajoule, CH, None)	Catalysts&adsorbents	0.00122557
('ILCD 2.0 2018 midpoint', 'resources', 'fossils')	'ATR BM, HT+LT, + CCS (VPSA), 98 (average)' (megajoule, CH, None)	CO2 transport and storage	0.00675226
('ILCD 2.0 2018 midpoint', 'resources', 'fossils')	'ATR BM, HT+LT, + CCS (VPSA), 98 (average)' (megajoule, CH, None)	Direct CO2 emissions	0
('ILCD 2.0 2018 midpoint', 'resources', 'fossils')	'ATR BM, HT+LT, + CCS (VPSA), 98 (average)' (megajoule, CH, None)	Electricity from/to grid	0.122681
('ILCD 2.0 2018 midpoint', 'resources', 'fossils')	'ATR BM, HT+LT, + CCS (VPSA), 98 (average)' (megajoule, CH, None)	Emissions from fuel burning in furnace	0
('ILCD 2.0 2018 midpoint', 'resources', 'fossils')	'ATR BM, HT+LT, + CCS (VPSA), 98 (average)' (megajoule, CH, None)	Fuel supply chain	0.1591
('ILCD 2.0 2018 midpoint', 'resources', 'fossils')	'ATR BM, HT+LT, + CCS (VPSA), 98 (average)' (megajoule, CH, None)	Plant infrastructure	0.009569
('ILCD 2.0 2018 midpoint', 'resources', 'fossils')	'ATR BM, HT+LT, + CCS (VPSA), 98 (average)' (megajoule, CH, None)	Water supply	0.000352253
('ILCD 2.0 2018 midpoint', 'resources', 'land use')	'ATR BM, HT+LT, + CCS (VPSA), 98 (average)' (megajoule, CH, None)	Catalysts&adsorbents	0.00112991
('ILCD 2.0 2018 midpoint', 'resources', 'land use')	'ATR BM, HT+LT, + CCS (VPSA), 98 (average)' (megajoule, CH, None)	CO2 transport and storage	0.00276696
('ILCD 2.0 2018 midpoint', 'resources', 'land use')	'ATR BM, HT+LT, + CCS (VPSA), 98 (average)' (megajoule, CH, None)	Direct CO2 emissions	0
('ILCD 2.0 2018 midpoint', 'resources', 'land use')	'ATR BM, HT+LT, + CCS (VPSA), 98 (average)' (megajoule, CH, None)	Electricity from/to grid	0.0539157
('ILCD 2.0 2018 midpoint', 'resources', 'land use')	'ATR BM, HT+LT, + CCS (VPSA), 98 (average)' (megajoule, CH, None)	Emissions from fuel burning in furnace	0
('ILCD 2.0 2018 midpoint', 'resources', 'land use')	'ATR BM, HT+LT, + CCS (VPSA), 98 (average)' (megajoule, CH, None)	Fuel supply chain	0.141476
('ILCD 2.0 2018 midpoint', 'resources', 'land use')	'ATR BM, HT+LT, + CCS (VPSA), 98 (average)' (megajoule, CH, None)	Plant infrastructure	0.0215587
('ILCD 2.0 2018 midpoint', 'resources', 'land use')	'ATR BM, HT+LT, + CCS (VPSA), 98 (average)' (megajoule, CH, None)	Water supply	0.000178245
('ILCD 2.0 2018 midpoint', 'resources', 'minerals and metals')	'ATR BM, HT+LT, + CCS (VPSA), 98 (average)' (megajoule, CH, None)	Catalysts&adsorbents	1.55187e-08
('ILCD 2.0 2018 midpoint', 'resources', 'minerals and metals')	'ATR BM, HT+LT, + CCS (VPSA), 98 (average)' (megajoule, CH, None)	CO2 transport and storage	9.09055e-10
('ILCD 2.0 2018 midpoint', 'resources', 'minerals and metals')	'ATR BM, HT+LT, + CCS (VPSA), 98 (average)' (megajoule, CH, None)	Direct CO2 emissions	0
('ILCD 2.0 2018 midpoint', 'resources', 'minerals and metals')	'ATR BM, HT+LT, + CCS (VPSA), 98 (average)' (megajoule, CH, None)	Electricity from/to grid	1.22434e-08
('ILCD 2.0 2018 midpoint', 'resources', 'minerals and metals')	'ATR BM, HT+LT, + CCS (VPSA), 98 (average)' (megajoule, CH, None)	Emissions from fuel burning in furnace	0
('ILCD 2.0 2018 midpoint', 'resources', 'minerals and metals')	'ATR BM, HT+LT, + CCS (VPSA), 98 (average)' (megajoule, CH, None)	Fuel supply chain	1.25277e-06
('ILCD 2.0 2018 midpoint', 'resources', 'minerals and metals')	'ATR BM, HT+LT, + CCS (VPSA), 98 (average)' (megajoule, CH, None)	Plant infrastructure	1.81182e-07
('ILCD 2.0 2018 midpoint', 'resources', 'minerals and metals')	'ATR BM, HT+LT, + CCS (VPSA), 98 (average)' (megajoule, CH, None)	Water supply	6.76656e-10
('ReCiPe Midpoint (H) V1.13', 'metal depletion', 'MDP')	'ATR BM, HT+LT, + CCS (VPSA), 98 (average)' (megajoule, CH, None)	Catalysts&adsorbents	0.00028327
('ReCiPe Midpoint (H) V1.13', 'metal depletion', 'MDP')	'ATR BM, HT+LT, + CCS (VPSA), 98 (average)' (megajoule, CH, None)	CO2 transport and storage	4.00261e-06
('ReCiPe Midpoint (H) V1.13', 'metal depletion', 'MDP')	'ATR BM, HT+LT, + CCS (VPSA), 98 (average)' (megajoule, CH, None)	Direct CO2 emissions	0
('ReCiPe Midpoint (H) V1.13', 'metal depletion', 'MDP')	'ATR BM, HT+LT, + CCS (VPSA), 98 (average)' (megajoule, CH, None)	Electricity from/to grid	4.39732e-05
('ReCiPe Midpoint (H) V1.13', 'metal depletion', 'MDP')	'ATR BM, HT+LT, + CCS (VPSA), 98 (average)' (megajoule, CH, None)	Emissions from fuel burning in furnace	0
('ReCiPe Midpoint (H) V1.13', 'metal depletion', 'MDP')	'ATR BM, HT+LT, + CCS (VPSA), 98 (average)' (megajoule, CH, None)	Fuel supply chain	0.00319958
('ReCiPe Midpoint (H) V1.13', 'metal depletion', 'MDP')	'ATR BM, HT+LT, + CCS (VPSA), 98 (average)' (megajoule, CH, None)	Plant infrastructure	0.000575172
('ReCiPe Midpoint (H) V1.13', 'metal depletion', 'MDP')	'ATR BM, HT+LT, + CCS (VPSA), 98 (average)' (megajoule, CH, None)	Water supply	2.07627e-06
('cumulative energy demand', 'fossil', 'non-renewable energy resources, fossil')	'ATR BM, HT+LT, + CCS (VPSA), 98 (average), maximum C uptake' (megajoule, CH, None)	Catalysts&adsorbents	0.00104087
('cumulative energy demand', 'fossil', 'non-renewable energy resources, fossil')	'ATR BM, HT+LT, + CCS (VPSA), 98 (average), maximum C uptake' (megajoule, CH, None)	CO2 transport and storage	0.00356432
[truncated: 14,830 more rows]

## Sheet: LCI_H2 electrolysis
cutoff	20
Database	H2 from Electrolysis
[truncated: 188 more rows]

## Sheet: Carbon balance
	Properties of Biomethane and Natural gas
[truncated: 98 more rows]
